# Supplementary material
Source: PubMed Central journal article supplement (PMC7256942)
Supplement: oc0c00312_si_001.pdf [file oc0c00312_si_001.pdf]

## Supporting Information

### **Role of Structural Dynamics in Selectivity and Mechanism of Non-Heme Fe(II) and 2-Oxoglutarate-Dependent Oxygenases Involved in DNA Repair**

Sodiq O. Waheed,<sup>a</sup> Rajeev Ramanan,<sup>a</sup> Shobhit S. Chaturvedi,<sup>a</sup> Nicolai Lehnert,<sup>b</sup> Christopher J. Schofield,<sup>c</sup> Christo Z. Christov,<sup>a\*</sup> and Tatyana G. Karabancheva-Christova<sup>a\*</sup>

<sup>a</sup> Department of Chemistry, Michigan Technological University, Houghton, Michigan 49931, USA.

<sup>b</sup> Department of Chemistry, University of Michigan, Ann Arbor, Michigan 48109, USA.

<sup>c</sup> The Chemistry Research Laboratory, The Department of Chemistry, Mansfield Road, University of Oxford, Oxford, OX1 3TA, United Kingdom.

**\*Corresponding authors:** C.Z.C. (christov@mtu.edu), and T.G.K.C. (tatyana@mtu.edu)

### **Table of Contents**

| <b>List of Figures</b> |                                                                                                                                                                                                                        |    |
|------------------------|------------------------------------------------------------------------------------------------------------------------------------------------------------------------------------------------------------------------|----|
| <b>Figure S1</b>       | Average structure of AlkB-dsDNA (A) and the view of the active site (B) derived from Fe(III)-superoxo MD simulations.                                                                                                  | S4 |
| <b>Figure S2</b>       | RMSD Plots for AlkBH2-dsDNA (A), AlkB-ssDNA (B), AlkB-dsDNA (C) and the plot of distance between the distal oxygen (O <sub>d</sub> ) of the superoxide and C2 of 2OG (D) in the AlkBH2-dsDNA Fe(III)-superoxo complex. | S5 |
| <b>Figure S3</b>       | Centre of mass profile of the Fe(III)-superoxo AlkBH2-dsDNA, AlkB-ssDNA and AlkB-dsDNA                                                                                                                                 | S6 |
| <b>Figure S4</b>       | View of the structure of AlkBH2-dsDNA showing the location of the center of mass of the protein-DNA complex                                                                                                            | S6 |
| <b>Figure S5</b>       | View of the structure of AlkB-ssDNA showing the location of the center of mass of the protein-DNA complex                                                                                                              | S7 |
| <b>Figure S6</b>       | View of the structure of AlkB-dsDNA showing the location of the center of mass of the protein-DNA complex                                                                                                              | S7 |
| <b>Figure S7</b>       | Hydrogen bond interactions of Arg254 side chain with the non-coordinating carboxylate oxygen atom of Asp173 in AlkBH2-dsDNA during Fe(III)-superoxo MD simulation                                                      | S8 |
| <b>Figure S8</b>       | Hydrogen bond interactions of Arg210 side chain with the non-coordinating carboxylate oxygen atom of Asp133 in AlkB-ssDNA during Fe(III)-superoxo MD simulation                                                        | S8 |
| <b>Figure S9</b>       | Hydrogen bond interactions of Arg210 side chain with the non-coordinating carboxylate oxygen atom of Asp133 in AlkB-dsDNA during Fe(III)-superoxo MD simulation                                                        | S9 |
| <b>Figure S10</b>      | Stacking interaction of the iron coordinating residue His236 (His <sup>2</sup> ) with Phe195 and Phe197 in the Fe(III)-superoxo complex of AlkBH2-dsDNA                                                                | S9 |

|                   |                                                                                                                                                               |     |
|-------------------|---------------------------------------------------------------------------------------------------------------------------------------------------------------|-----|
| <b>Figure S11</b> | Stacking interactions of the iron coordinating residue His187 (His <sup>2</sup> ) with Phe154 and Trp178 in the Fe(III)-superoxo complex of AlkB-ssDNA        | S10 |
| <b>Figure S12</b> | Stacking interactions of the iron coordinating residue His187 (His <sup>2</sup> ) with Phe154 and Trp178 in the Fe(III)-superoxo complex of AlkB-dsDNA        | S10 |
| <b>Figure S13</b> | Dynamic cross correlation for the Fe(III)-superoxo complex of AlkB-ssDNA                                                                                      | S11 |
| <b>Figure S14</b> | Dynamic cross correlation for the Fe(III)-superoxo complex of AlkB-dsDNA                                                                                      | S12 |
| <b>Figure S15</b> | Annotation of the secondary structure of AlkBH2-dsDNA                                                                                                         | S13 |
| <b>Figure S16</b> | Annotation of the secondary structure of AlkBs                                                                                                                | S13 |
| <b>Figure S17</b> | PCA for the AlkB-ssDNA Fe(III)-superoxo MD simulation                                                                                                         | S14 |
| <b>Figure S18</b> | PCA for the AlkB-dsDNA Fe(III)-superoxo MD simulation                                                                                                         | S15 |
| <b>Figure S19</b> | View of the Average MD structure of AlkBH2-dsDNA with undamaged DNA                                                                                           | S16 |
| <b>Figure S20</b> | View of the Average MD structure of AlkB-ssDNA with undamaged DNA                                                                                             | S16 |
| <b>Figure S21</b> | View of the Average MD structure of AlkB-dsDNA with undamaged DNA                                                                                             | S17 |
| <b>Figure S22</b> | RMSD Plot for AlkBH2-dsDNA with undamaged DNA                                                                                                                 | S17 |
| <b>Figure S23</b> | RMSD Plot for AlkB-ssDNA with undamaged DNA                                                                                                                   | S18 |
| <b>Figure S24</b> | RMSD Plot for AlkB-dsDNA with undamaged DNA                                                                                                                   | S18 |
| <b>Figure S25</b> | The distance between Fe center (Fe) and N3 of the substrate in the AlkBH2-dsDNA Fe(III)-superoxo complex MD simulations                                       | S19 |
| <b>Figure S26</b> | The distance between Fe center (Fe) and N3 of the substrate in the AlkB-ssDNA Fe(III)-superoxo complex MD simulations                                         | S19 |
| <b>Figure S27</b> | The distance between Fe center (Fe) and N3 of the substrate in the AlkB-dsDNA Fe(III)-superoxo complex MD simulations                                         | S20 |
| <b>Figure S28</b> | The distance between distal oxygen (O <sub>d</sub> ) of the superoxide and C2 of 2OG in the AlkB-ssDNA Fe(III)-superoxo complex MD simulation                 | S20 |
| <b>Figure S29</b> | The distance between distal oxygen (O <sub>d</sub> ) of the superoxide and C2 of 2OG in AlkB-dsDNA Fe(III)-superoxo complex MD simulation                     | S21 |
| <b>Figure S30</b> | The reaction states geometries of the dioxygen activation step stationary points in AlkB-ssDNA                                                                | S22 |
| <b>Figure S31</b> | The reaction states geometries of the dioxygen activation step stationary points in AlkB-dsDNA                                                                | S23 |
| <b>Figure S32</b> | The reaction states geometries (IM3', IM5 and IM7) for the proposed ferryl flip mechanism stationary points in AlkBH2-dsDNA                                   | S24 |
| <b>Figure S33</b> | The reaction states geometries for the proposed ferryl flip mechanism stationary points via the direct hydrogen transfer from IM6 in the AlkBH2-dsDNA complex | S25 |
| <b>Figure S34</b> | RMSD plot for the Protein-DNA complex of AlkBH2-dsDNA Fe(II) five-coordinate enzyme-substrate complex MD Simulation                                           | S25 |

|                                                                                                       |                                                                                                                                                                                                                                              |                |
|-------------------------------------------------------------------------------------------------------|----------------------------------------------------------------------------------------------------------------------------------------------------------------------------------------------------------------------------------------------|----------------|
| <b>Figure S35</b>                                                                                     | The N <sup>ε</sup> (His <sup>1</sup> )-Fe-O5-O2 dihedral angle in AlkBH2-dsDNA Fe(II) five-coordinate enzyme-substrate complex MD Simulation                                                                                                 | S26            |
| <b>Figure S36</b>                                                                                     | RMSD plot for the Protein-DNA complex of AlkBH2-dsDNA “in-line” Fe(III)-superoxo complex MD simulation                                                                                                                                       | S26            |
| <b>Figure S37</b>                                                                                     | The distance between distal oxygen (O <sub>d</sub> ) of the superoxide and C2 of 2OG in AlkBH2-dsDNA “in-line” Fe(III)-superoxo complex MD simulation                                                                                        | S27            |
| <b>Figure S38</b>                                                                                     | The reaction states geometries of the dioxygen activation step stationary points of AlkBH2-dsDNA via “in-line” Fe(III)-superoxo complex                                                                                                      | S28            |
| <b>Figure S39</b>                                                                                     | RMSD Plots for AlkBH2-dsDNA (A), AlkB-ssDNA (B), AlkB-dsDNA (C) and the plot of the distance between the proximal oxygen (O <sub>p</sub> ) and the carbon of the methyl-group of m <sub>3</sub> C (D) in the ferryl complex of AlkBH2-dsDNA. | S29            |
| <b>Figure S40</b>                                                                                     | Centre of mass profile of the ferryl AlkBH2-dsDNA, AlkB-ssDNA and AlkB-dsDNA                                                                                                                                                                 | S30            |
| <b>Figure S41</b>                                                                                     | Distance between proximal oxygen (O <sub>p</sub> ) and the methyl carbon of m <sub>3</sub> C DNA substrate in the AlkB-ssDNA ferryl complex MD simulation                                                                                    | S30            |
| <b>Figure S42</b>                                                                                     | Distance between the proximal oxygen (O <sub>p</sub> ) and the methyl carbon of m <sub>3</sub> C DNA substrate in the AlkB-dsDNA ferryl complex MD simulation                                                                                | S31            |
| <b>Figure S43</b>                                                                                     | Dynamic cross correlation for the ferryl complex of AlkB-ssDNA                                                                                                                                                                               | S32            |
| <b>Figure S44</b>                                                                                     | Dynamic cross correlation for the ferryl complex of AlkB-dsDNA                                                                                                                                                                               | S33            |
| <b>Figure S45</b>                                                                                     | PCA for the AlkB-ssDNA ferryl MD simulation                                                                                                                                                                                                  | S34            |
| <b>Figure S46</b>                                                                                     | PCA for the AlkB-dsDNA ferryl MD simulation                                                                                                                                                                                                  | S35            |
| <b>Figure S47</b>                                                                                     | The reaction states geometries of the hydrogen atom abstraction and rebound hydroxylation steps stationary points in AlkB-ssDNA.                                                                                                             | S36            |
| <b>Figure S48</b>                                                                                     | The reaction states geometries of the hydrogen atom abstraction and rebound hydroxylation steps stationary points in AlkB-dsDNA.                                                                                                             | S37            |
| <b>Figure S49</b>                                                                                     | Optimized geometries of the rebound hydroxylation stationary points in AlkBH2-dsDNA.                                                                                                                                                         | S38            |
| <b>The cartesian coordinates of the QM/MM optimized QM region geometries of the stationary points</b> |                                                                                                                                                                                                                                              | <b>S43-S99</b> |
| <b>List of Tables</b>                                                                                 |                                                                                                                                                                                                                                              |                |
| <b>Table S1</b>                                                                                       | Calculated activation barriers (in kcal/mol) at B3LYP/def2-TZVP (BS2) for all the multiple snapshots with and without ZPE in AlkB-ssDNA                                                                                                      | S39            |
| <b>Table S2</b>                                                                                       | Selected distances and angles for the different snapshots RC2 and TS7 for HAT step in AlkB-ssDNA, calculated at B3LYP/def2-TZVP                                                                                                              | S39            |
| <b>Table S3</b>                                                                                       | Calculated activation barriers (in kcal/mol) at B3LYP/def2-TZVP (BS2) for all the multiple snapshots with and without ZPE in AlkB-dsDNA                                                                                                      | S40            |
| <b>Table S4</b>                                                                                       | Selected distances and angles for the different snapshots RC2 and TS7 for HAT step in AlkB-dsDNA, calculated at B3LYP/def2-TZVP                                                                                                              | S40            |
| <b>Table S5</b>                                                                                       | Calculated pK <sub>a</sub> values of the ionisable side chains of AlkBH2-dsDNA, AlkB-ssDNA and AlkB-dsDNA, done using Propka software                                                                                                        | S41            |
| <b>References</b>                                                                                     |                                                                                                                                                                                                                                              | <b>S99</b>     |

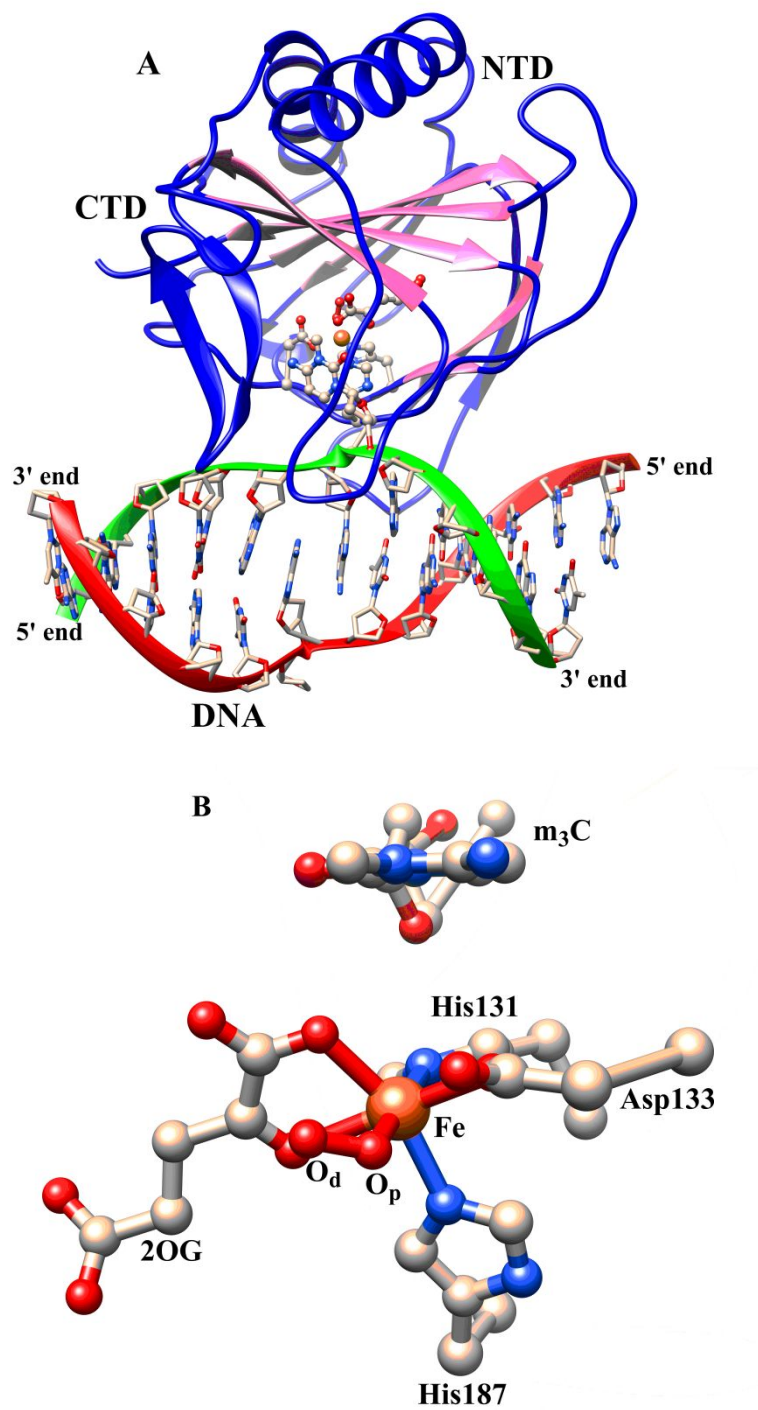

**Figure S1** Average structure of AlkB-dsDNA (A) and a view of the AlkB-dsDNA active site (B) derived from the Fe(III)-superoxo MD simulations. Coloring in (A): double stranded beta helix (DSBH) core fold (pink). m<sub>3</sub>C: 3-methylcytosine.

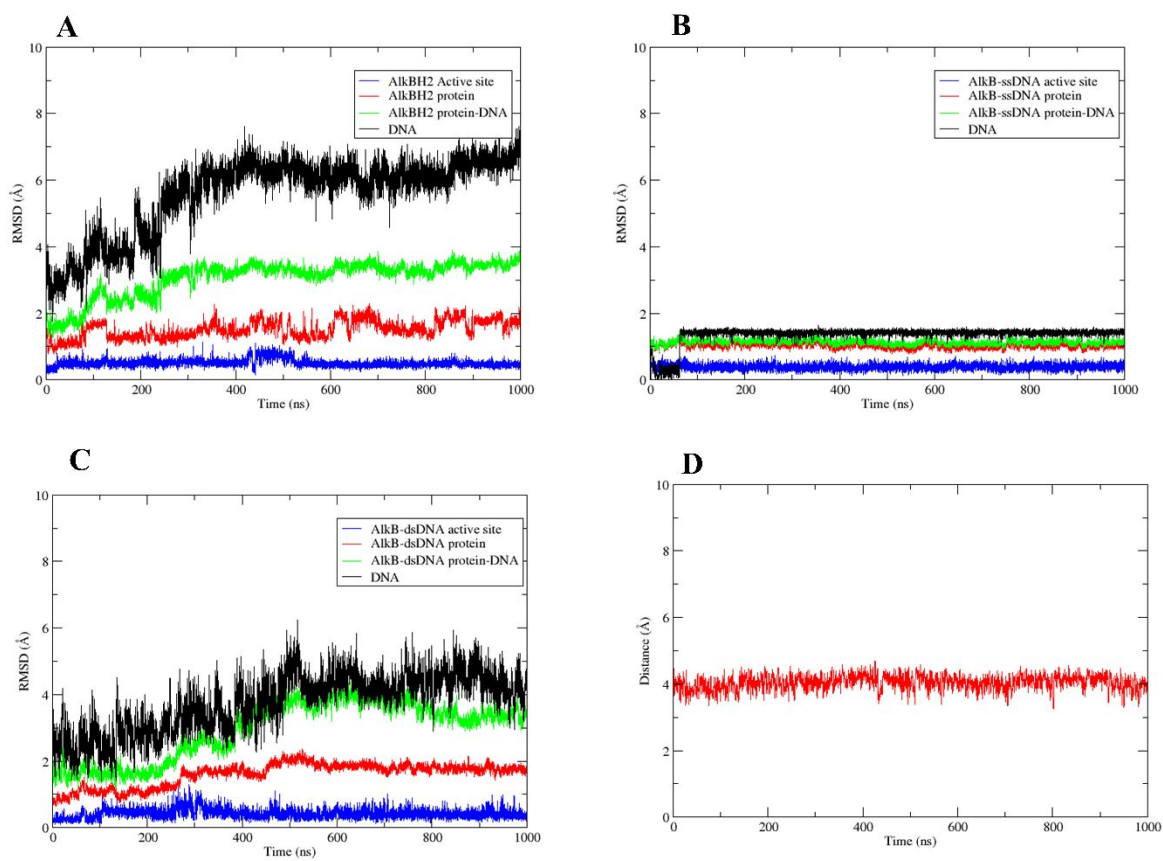

**Figure S2** RMSD Plots for AlkBH2-dsDNA (A), AlkB-ssDNA (B), AlkB-dsDNA (C) and plot of the distance between the distal oxygen ( $O_d$ ) of the superoxide and C2 of 2OG (D) in the AlkBH2-dsDNA Fe(III)-superoxo complex.

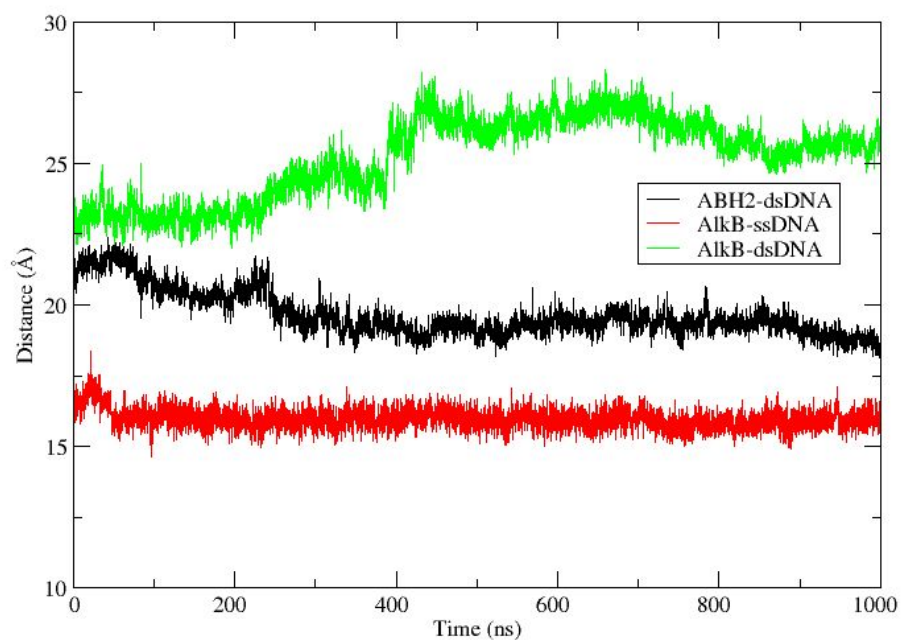

**Figure S3** Measured distances between the center of mass of the protein and the DNA molecule in the AlkBH2-dsDNA, AlkB-ssDNA and AlkB-dsDNA complexes, during MD simulations of the Fe(III)-superoxo intermediates.

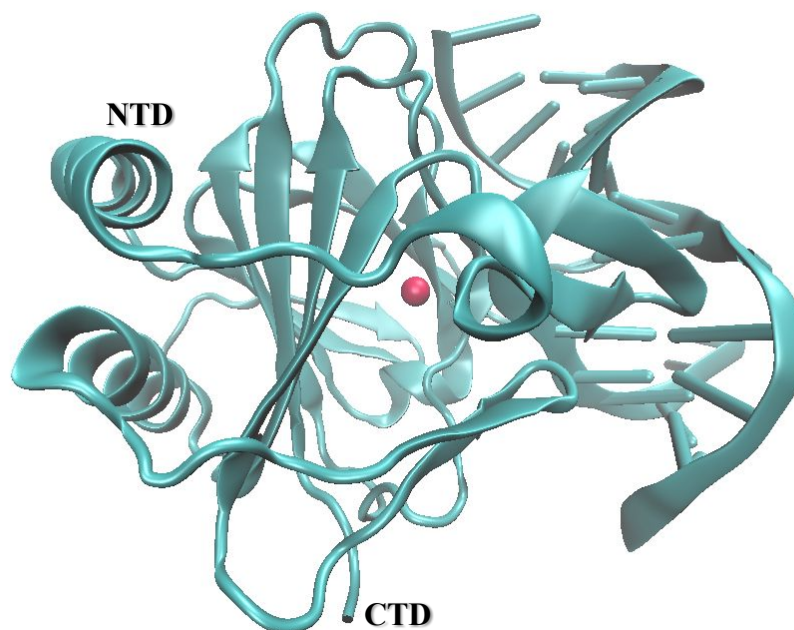

**Figure S4** View of the structure of AlkBH2-dsDNA showing the location of the center of mass (in red sphere) of the protein-DNA complex. NTD and CTD are N-terminal Domain and C-terminal Domain, respectively.

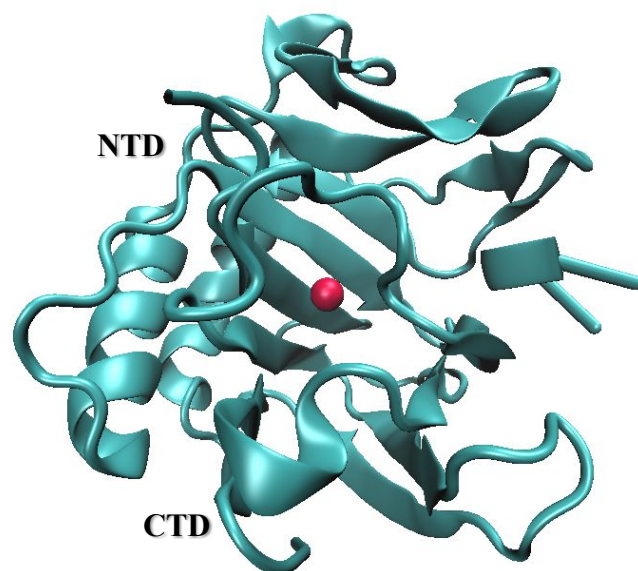

**Figure S5** View of the structure of AlkB-ssDNA showing the location of the center of mass (in red sphere) of the protein-DNA complex. NTD and CTD are N-terminal Domain and C-terminal Domain, respectively.

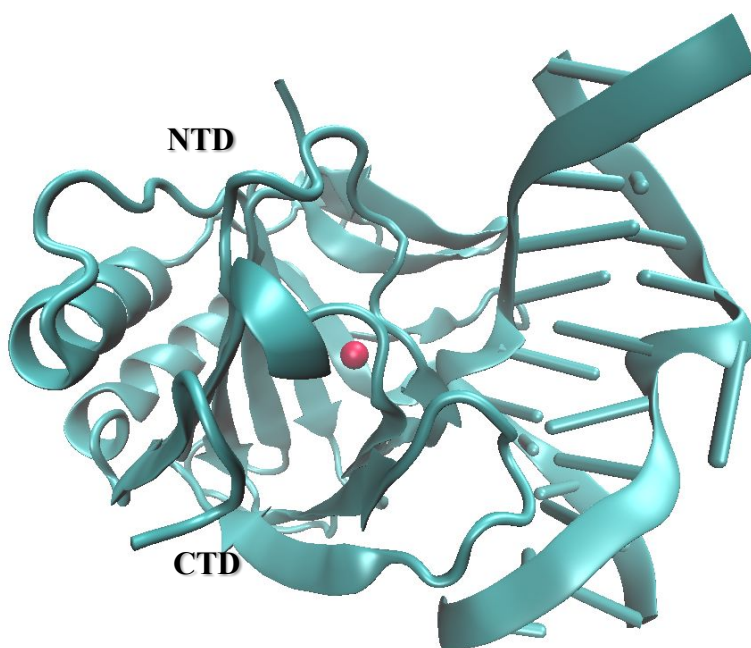

**Figure S6** View of the structure of AlkB-dsDNA showing the location of the center of mass (in red sphere) of the protein-DNA complex. NTD and CTD are N-terminal Domain and C-terminal Domain, respectively.

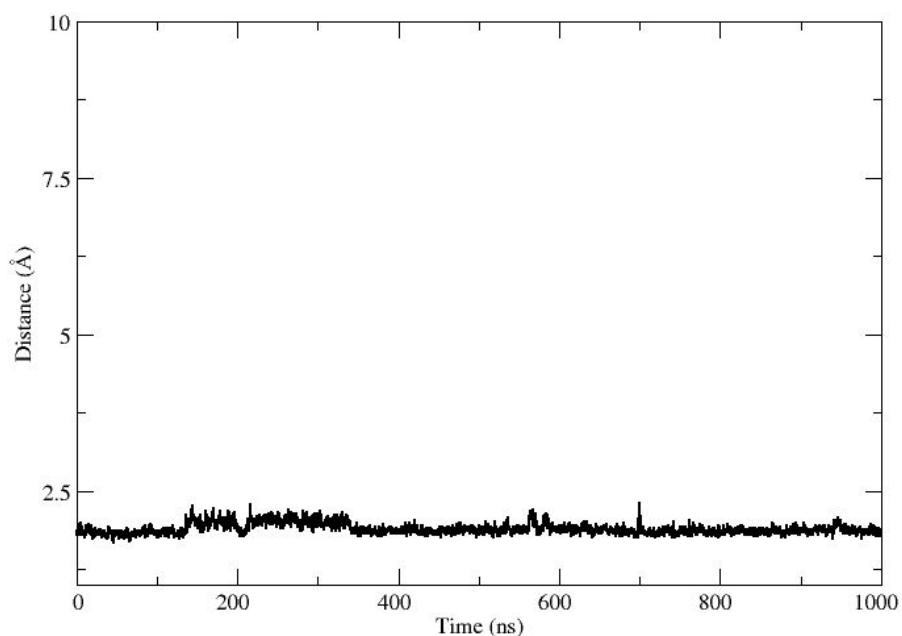

**Figure S7** Hydrogen bonding interaction of Arg254 side chain with the non metal ion coordinating carboxylate oxygen of Asp173 in the AlkBH2-dsDNA complex during the Fe(III)-superoxo MD simulations. The distance was measured between the center of mass of the atoms forming the guanidino group of Arg254 and the carboxylate of Asp173.

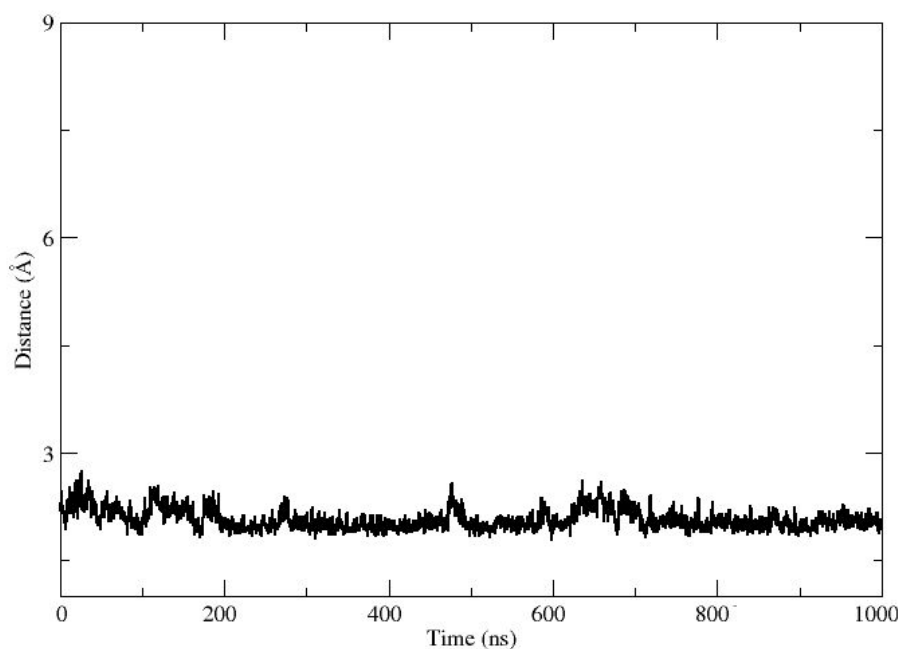

**Figure S8** Hydrogen bonding interaction of Arg210 side chain with the non metal ion coordinating carboxylate oxygen of Asp133 in the AlkB-ssDNA complex during the Fe(III)-superoxo MD simulations. The distance was measured between the center of mass of the atoms forming the guanidino group of Arg210 and the carboxylate of Asp133.



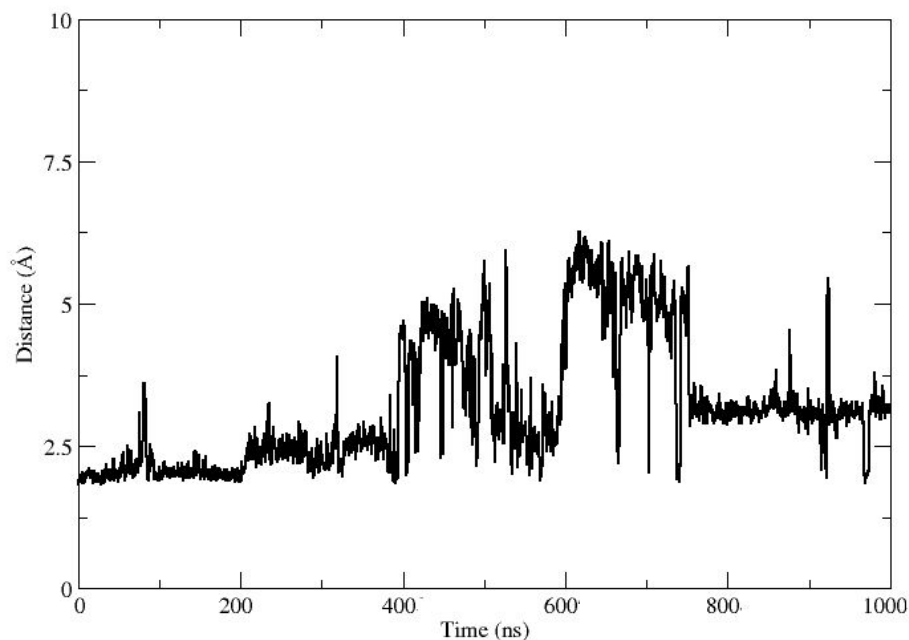

**Figure S9** Hydrogen bonding interaction of Arg210 side chain with the non meta ion coordinating carboxylate oxygen of Asp133 in the AlkB-dsDNA complex during the Fe(III)-superoxo MD simulations. The distance was measured between the center of mass of the atoms forming the guanidino group of Arg210 and the carboxylate of Asp133.

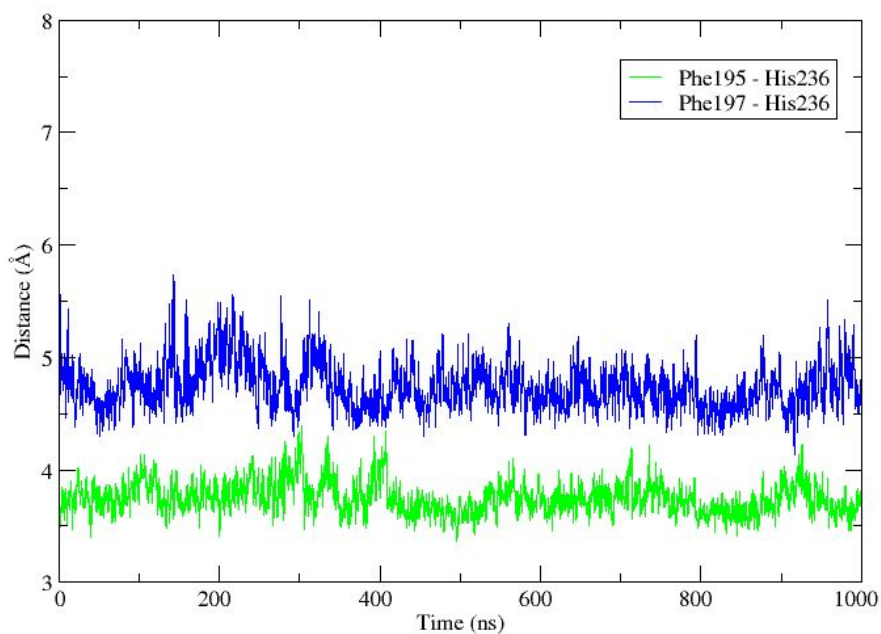

**Figure S10** Stacking interaction of the iron coordinating residue His236 (His<sup>2</sup>) with Phe195 and Phe197 at the Fe(III)-superoxo intermediate stage of the AlkBH2-dsDNA complex. Distances were measured between the center of mass of the atoms forming the imidazole ring of His236 and the phenyl groups of Phe195 and Phe197.

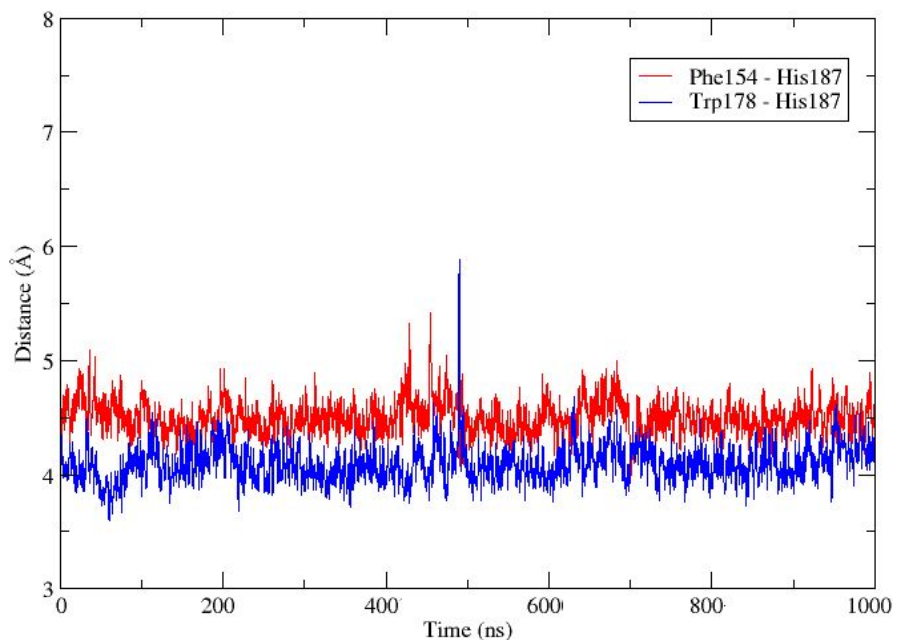

**Figure S11** Stacking interactions of the iron coordinating residue His187 (His<sup>2</sup>) with Phe154 and Trp178 at the Fe(III)-superoxo intermediate stage of the AlkB-ssDNA complex. Distances were measured between the center of mass of the atoms forming the imidazole ring of His187, the phenyl group of Phe154, and the indole group of Trp178.

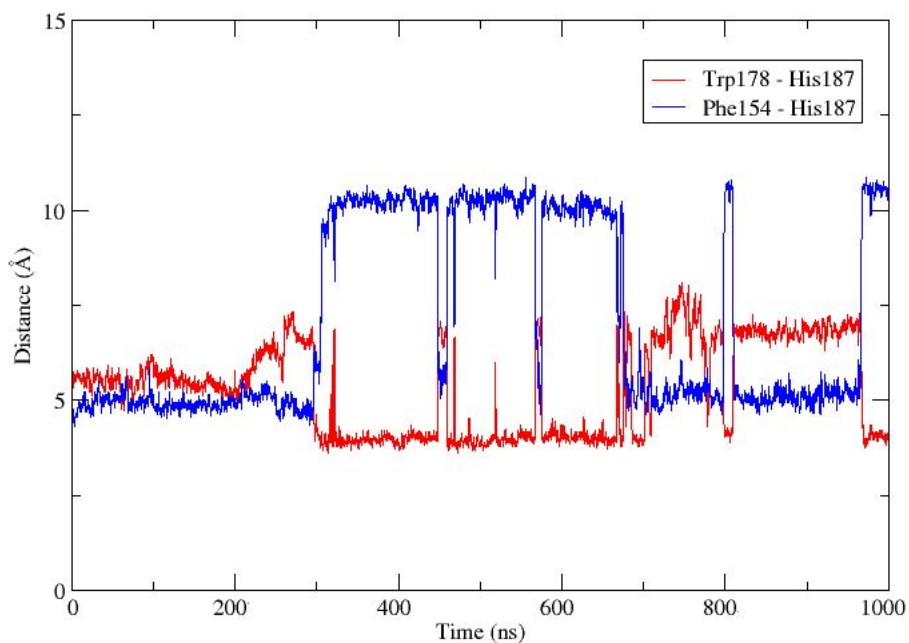

**Figure S12** Stacking interactions of the iron coordinating residue His187 (His<sup>2</sup>) with Phe154 and Trp178 at the Fe(III)-superoxo intermediate stage of the AlkB-dsDNA complex. Distances were measured between the center of mass of the atoms forming the imidazole group of His187, phenyl group of Phe154, and indole group of Trp178.

With AlkBH2-dsDNA, DCCA shows that residues 57-87, belonging to ( $\beta$ 1-  $\beta$ 2) and ( $\alpha$ 1), manifest a positive correlation with residues 210-237 ( $\beta$ 11-  $\beta$ 13), and residues 152-197 ( $\beta$ 8-  $\beta$ 10) manifest a positive correlation with residues 210-250 ( $\beta$ 11-  $\beta$ 14) and ( $\alpha$ 5) (Figure 2A). Similarly, in AlkB-ssDNA (Fig. S13), residues 17-27 ( $\beta$ 1) show a positive correlation with 174-178 (the loop connecting  $\beta$ 9 to  $\beta$ 10), and residues 114-159 ( $\beta$ 5-  $\beta$ 8) have a positive correlation with residues 164-210 ( $\beta$ 9-  $\beta$ 12) and ( $\alpha$ 3). With AlkB-dsDNA (Fig. S14), residues 43-60 ( $\alpha$ 1) have a positive correlation with residues 65-93 ( $\beta$ 3-  $\beta$ 4); residues 15-26 ( $\beta$ 1) show a positive correlation with residues 98-113 ( $\alpha$ 2); residues 58-63 ( $\beta$ 2) have a positive correlation with 113-128 ( $\beta$ 5); residues 93-133 ( $\alpha$ 3) and ( $\beta$ 5-  $\beta$ 6) have positive correlations with residues 128-178 ( $\beta$ 6- $\beta$ 10); residues 113-184 ( $\beta$ 5-  $\beta$ 8) have a positive correlation with residues 158-191 ( $\beta$ 9-  $\beta$ 11); and residues 123-193 ( $\beta$ 6-  $\beta$ 11) and ( $\alpha$ 3) show a negative correlation with the DNA. Figures S15 and S16 contain the annotated secondary structures of AlkBH2-dsDNA and AlkBs, respectively.

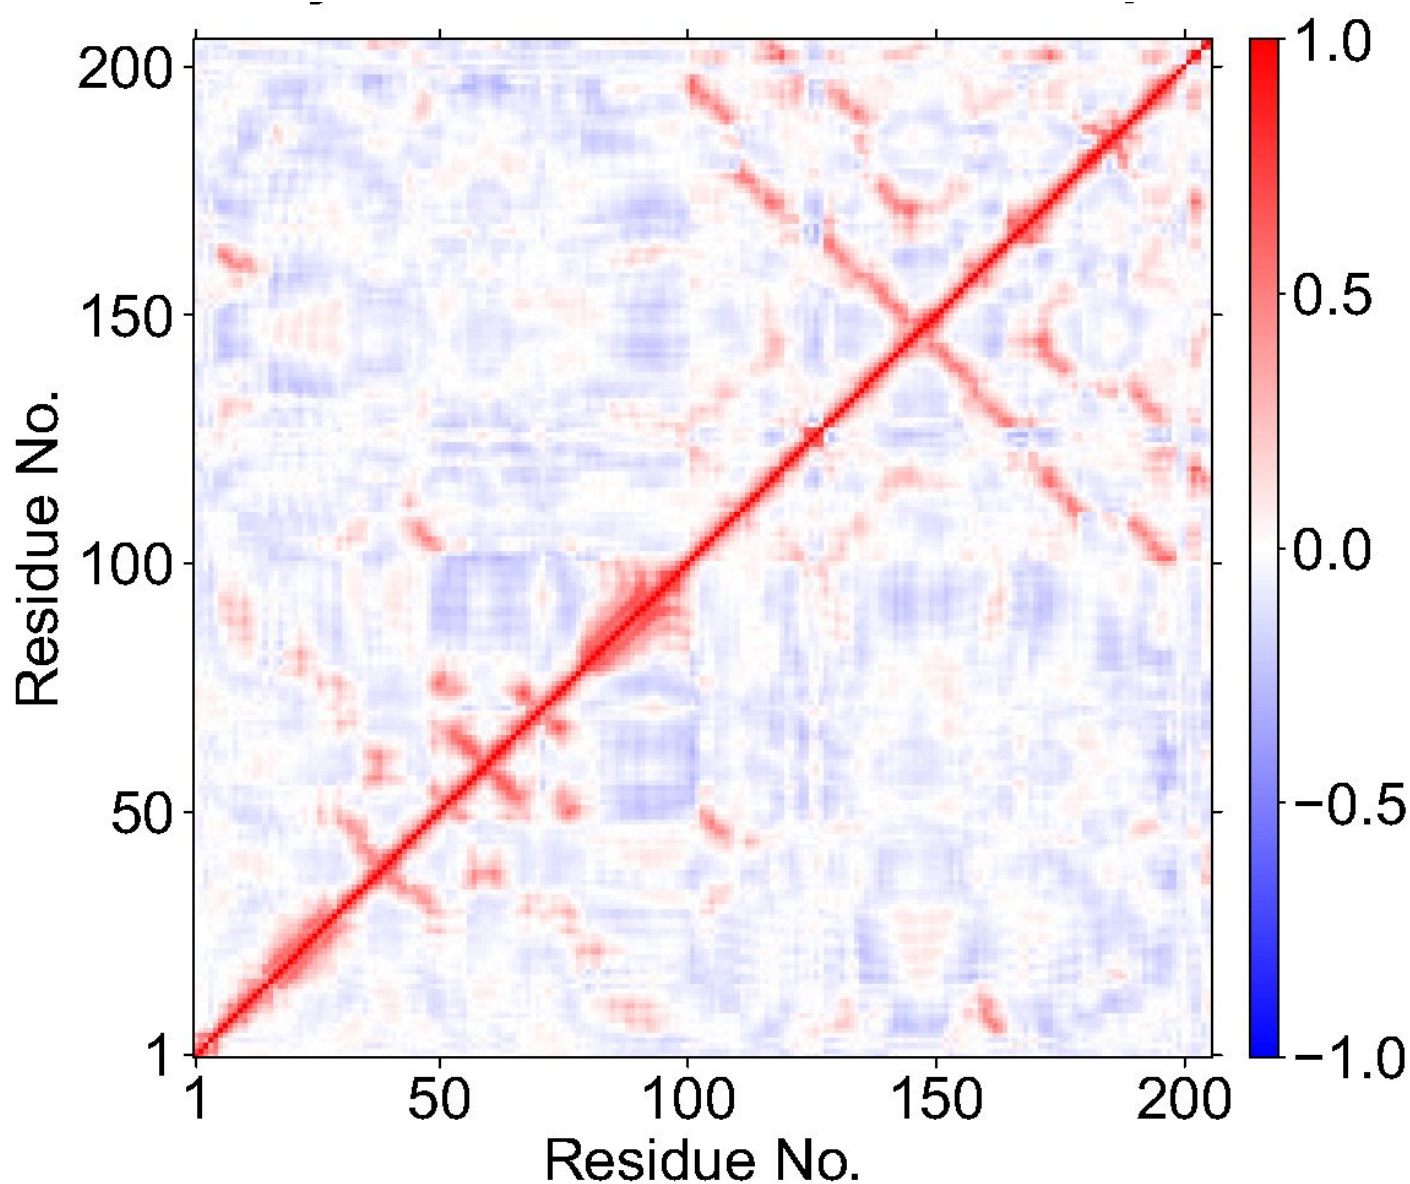

**Figure S13** Dynamic cross correlation for the Fe(III)-superoxo intermediate stage of the AlkB-ssDNA complex. Residue numbers 1-200 (protein), 201 (Fe), 202 (O<sub>2</sub>), 203 (2OG), 204-206 (DNA) and 205 (m<sub>3</sub>C substrate).

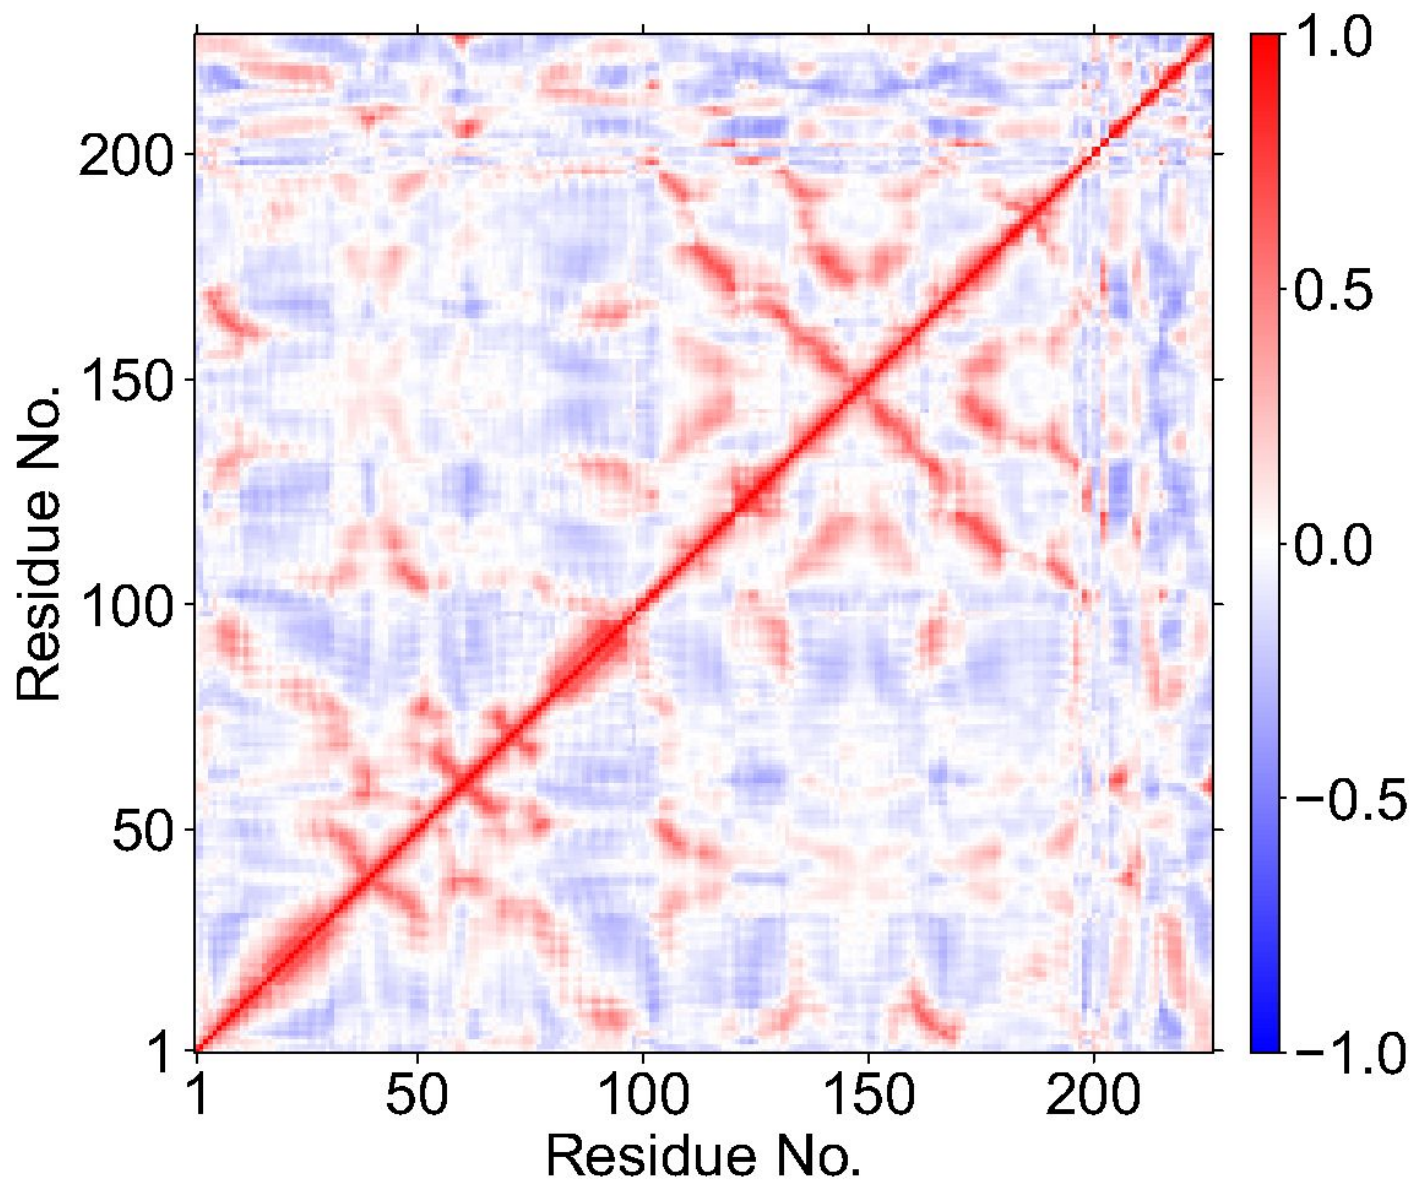

**Figure S14** Dynamic cross correlation for the Fe(III)-superoxo intermediate stage of the complex AlkB-dsDNA. Residue numbers 1-201 (protein), 202 (Fe), 203 (O<sub>2</sub>), 204 (2OG), 205-229 (DNA) and 211 (m<sub>3</sub>C substrate).



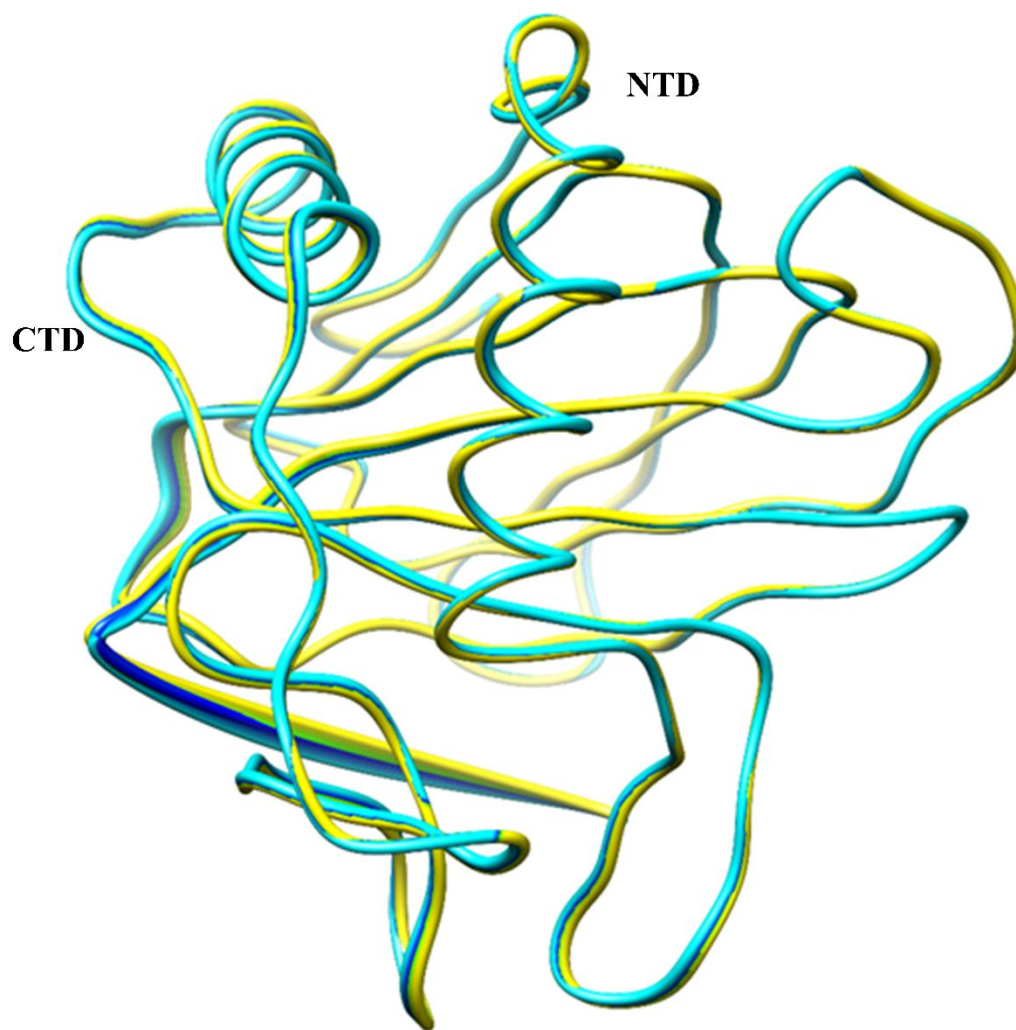

**Figure S17** PCA for the AlkB-ssDNA Fe(III)-superoxo MD simulation. Yellow to blue coloring represents the main direction of motion of protein residues. NTD and CTD are N-terminal Domain and C-terminal Domain, respectively.

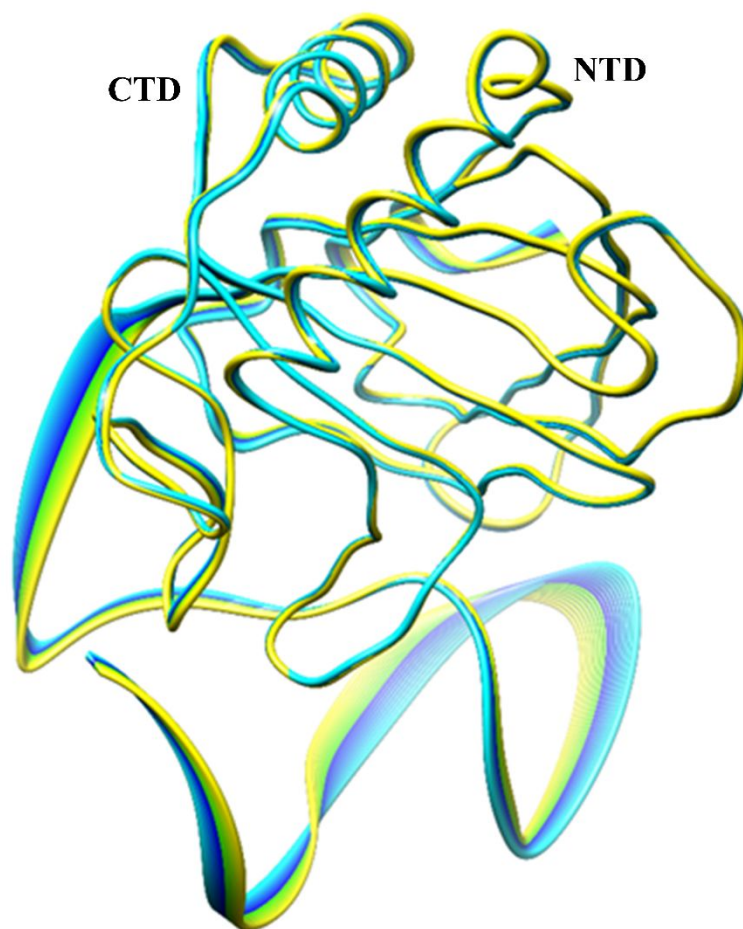

**Figure S18** PCA for the AlkB-dsDNA Fe(III)-superoxo MD simulation. Yellow to blue coloring represents the main direction of motion of protein residues. NTD and CTD are N-terminal Domain and C-terminal Domain, respectively.

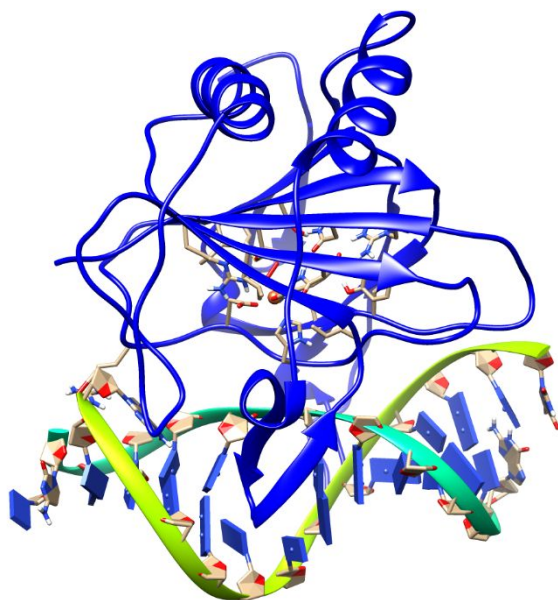

**Figure S19** View of an MD structure of AlkBH2-dsDNA with undamaged DNA.

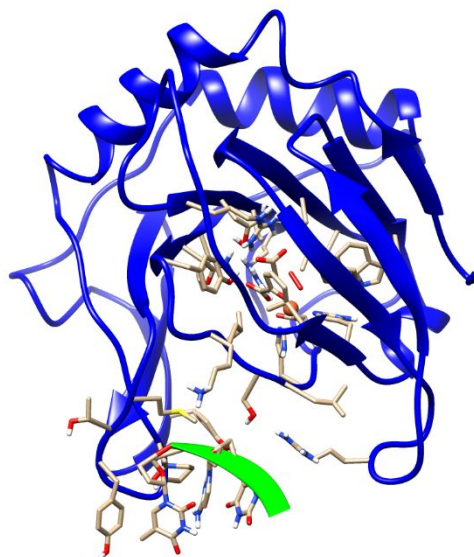

**Figure S20** View of an MD structure of AlkB-ssDNA with undamaged DNA.



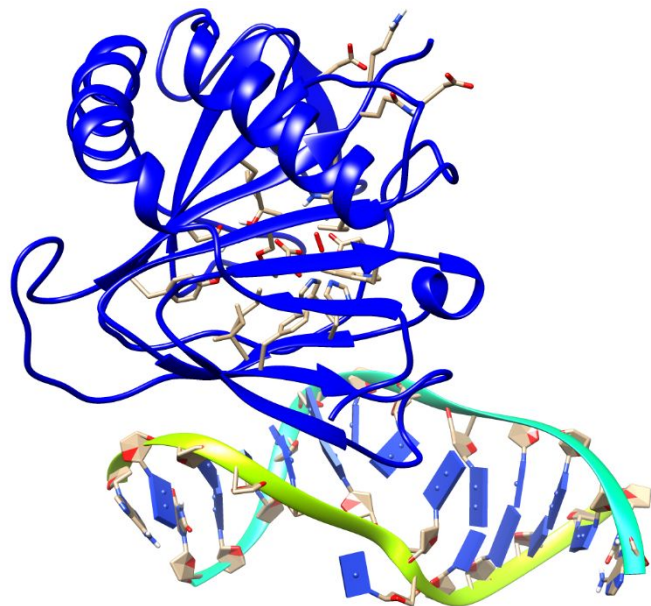

**Figure S21** View of an MD structure of AlkB-dsDNA with undamaged DNA.

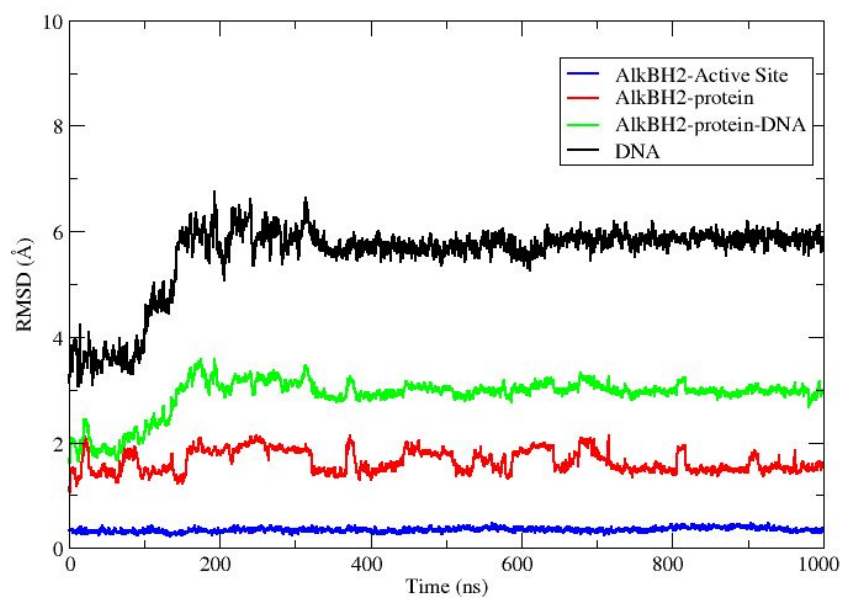

**Figure S22** RMSD Plot for AlkBH2-dsDNA with undamaged DNA.

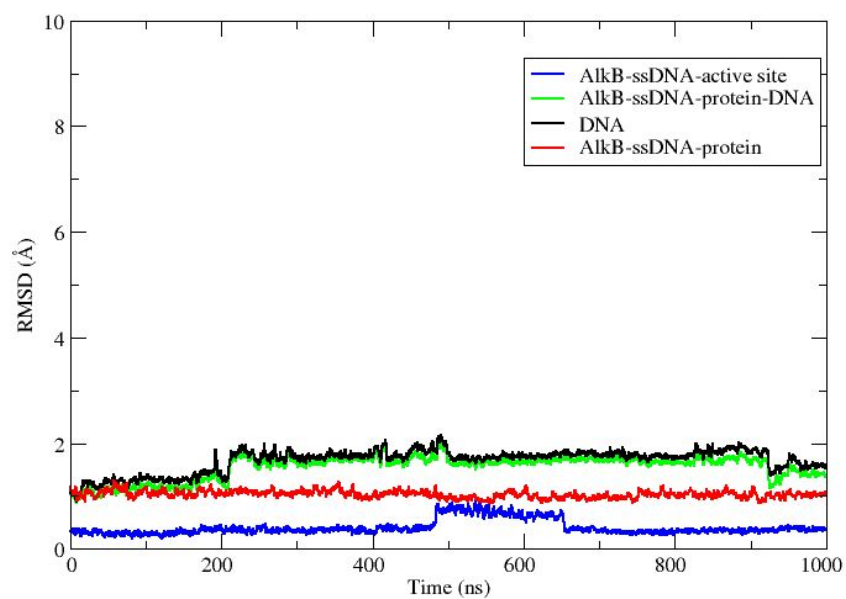

**Figure S23** RMSD Plot for AlkB-ssDNA with undamaged DNA.

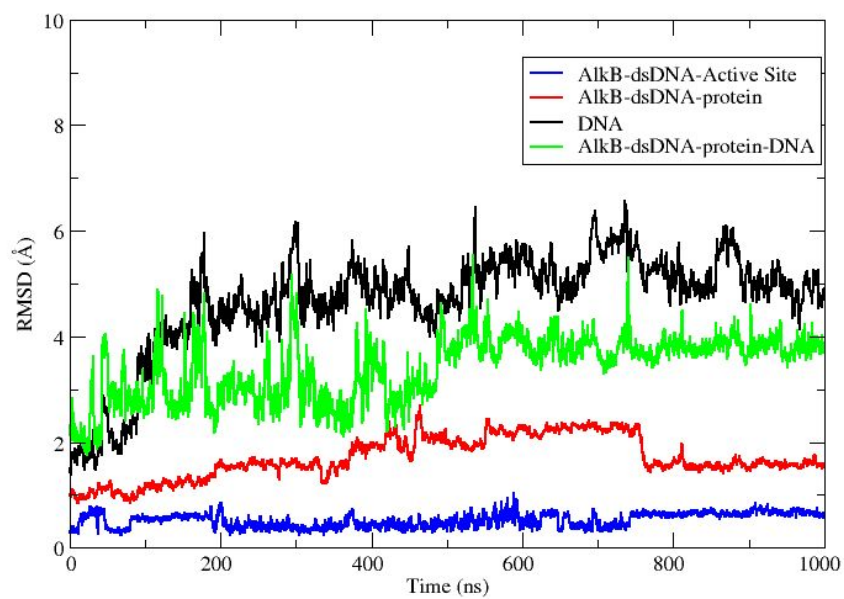

**Figure S24** RMSD Plot for AlkB-dsDNA with undamaged DNA.

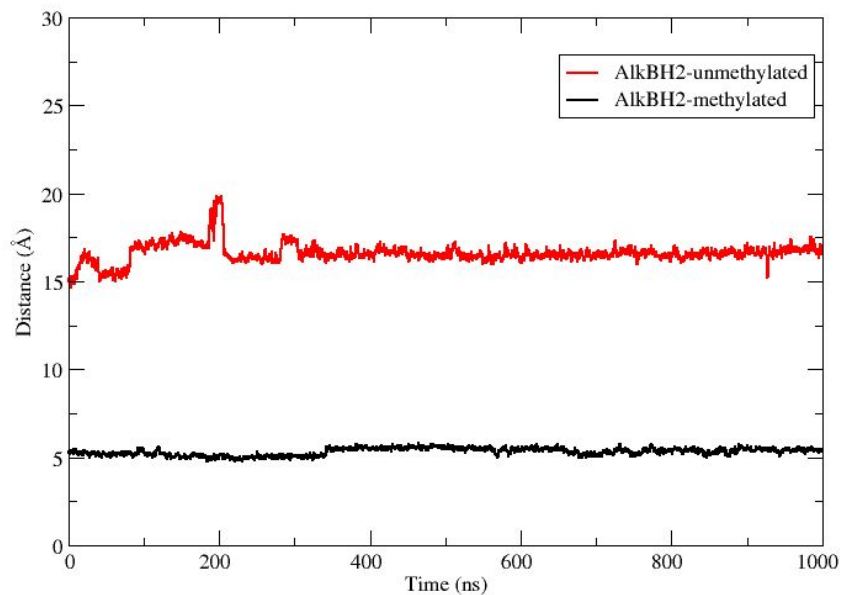

**Figure S25** The distance between Fe center (Fe) and N3 of the substrate in the AlkBH2-dsDNA Fe(III)-superoxo complex MD simulations.

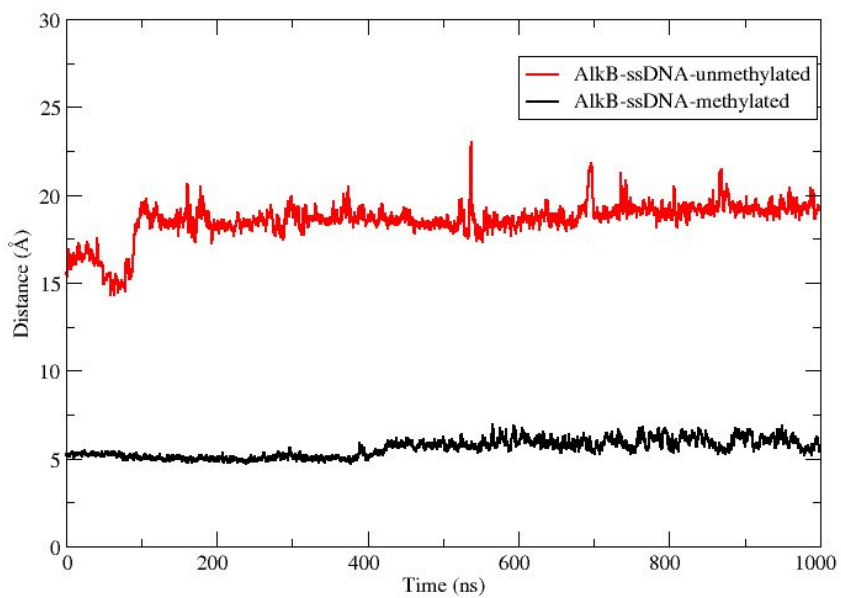

**Figure S26** The distance between Fe center (Fe) and N3 of the substrate in the AlkB-ssDNA Fe(III)-superoxo complex MD simulations.

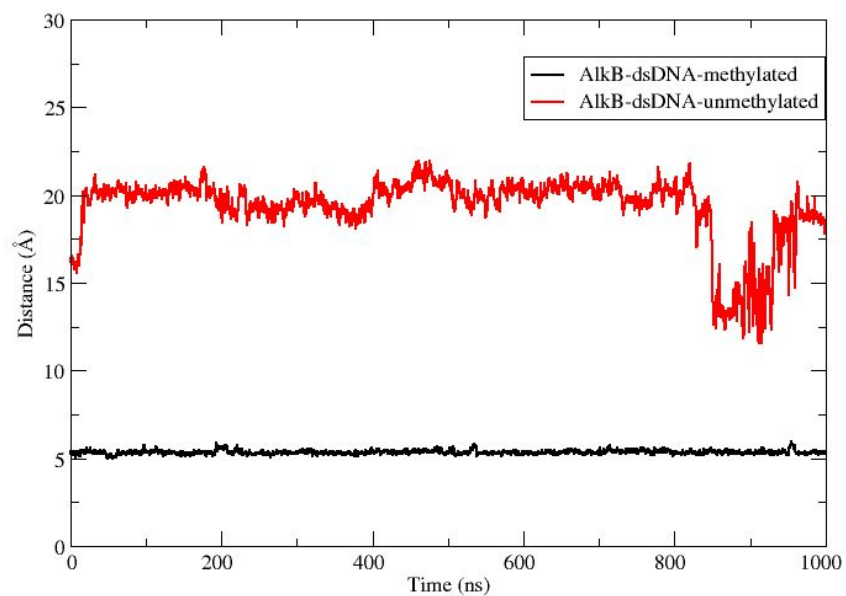

**Figure S27** The distance between Fe center (Fe) and N3 of the substrate in the AlkB-dsDNA Fe(III)-superoxo complex MD simulations.

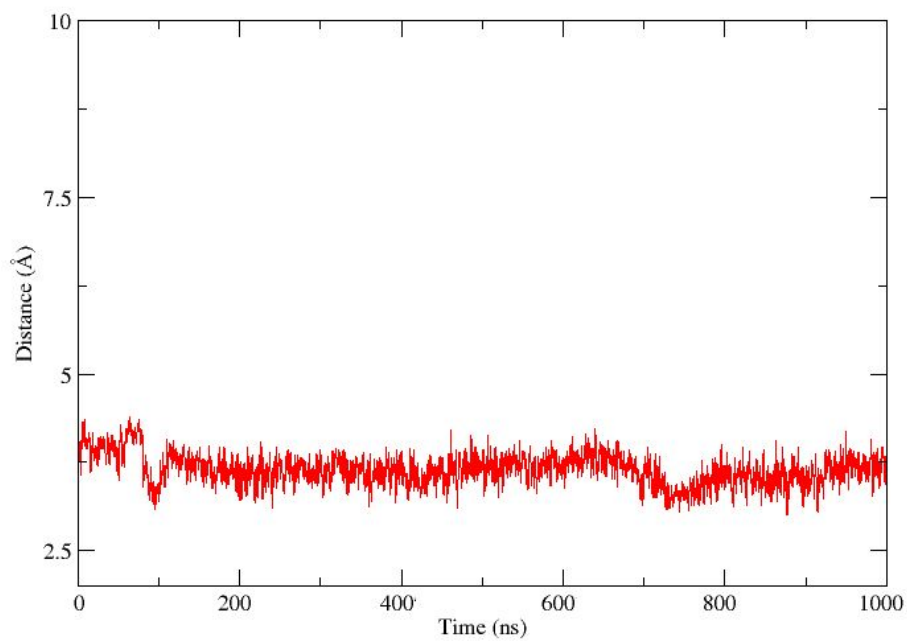

**Figure S28** The distance between distal oxygen (O<sub>d</sub>) of the superoxide and C2 of 2OG in the AlkB-ssDNA Fe(III)-superoxo complex MD simulations.

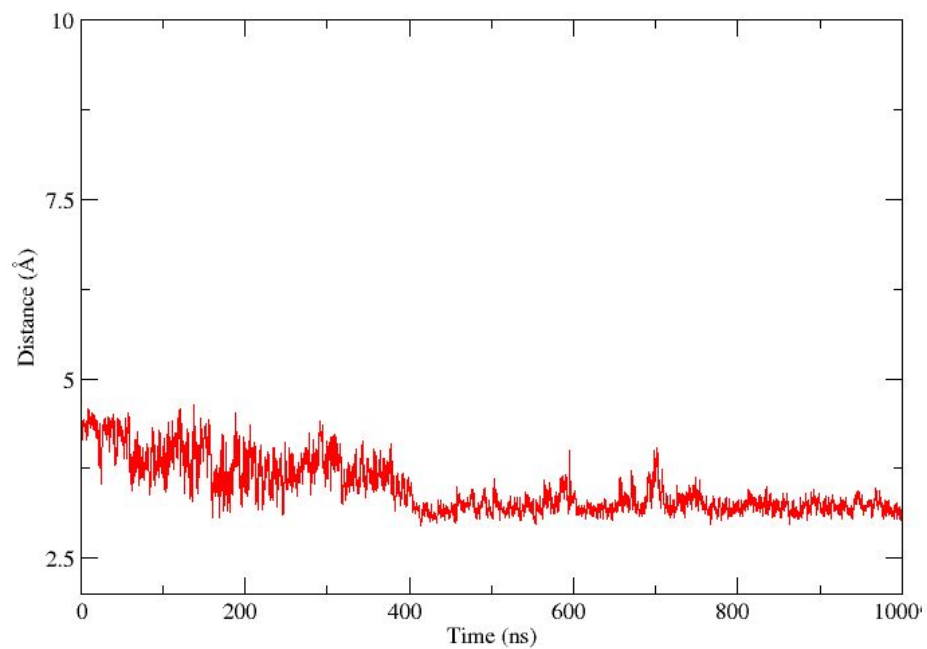

**Figure S29** The distance between distal oxygen ( $O_d$ ) of the superoxide and C2 of 2OG in AlkB-dsDNA Fe(III)-superoxo complex MD simulations.

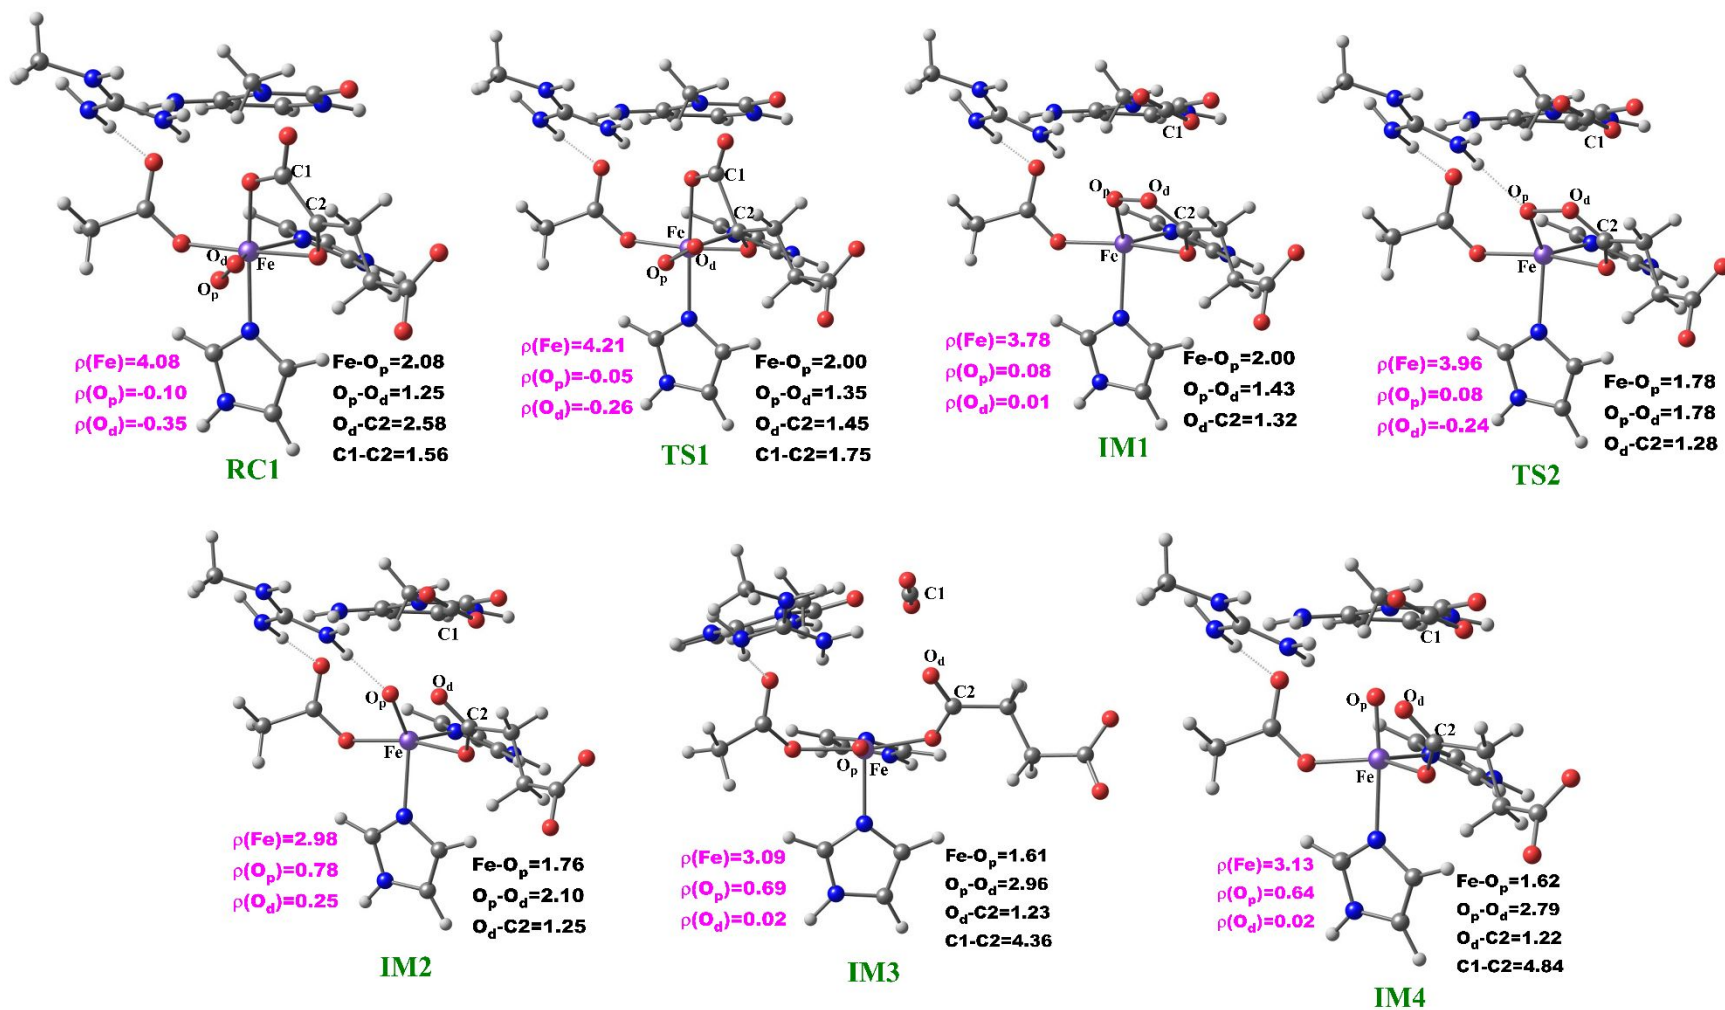

**Figure S30** The reaction state geometries of the dioxygen activation step stationary points in AlkB-ssDNA. Distances (Å) and spin densities are in black and pink, respectively.

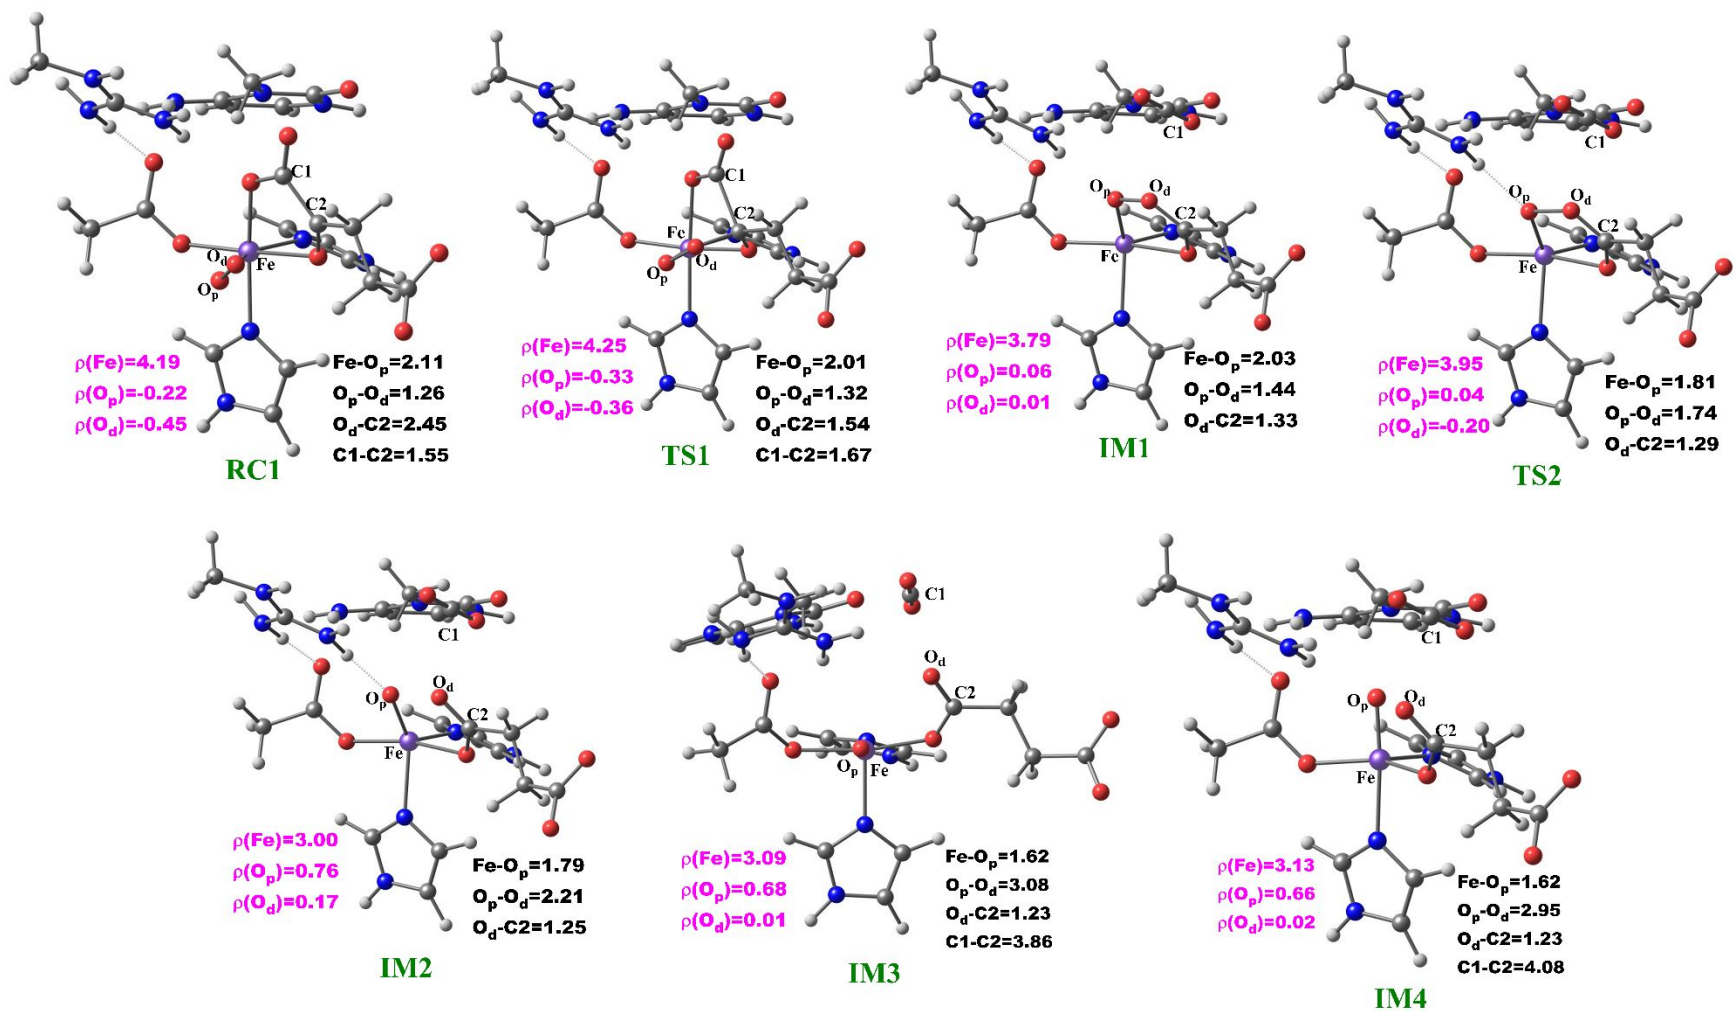

**Figure S31** The reaction state geometries of the dioxygen activation step stationary points in AlkB-dsDNA. Distances (Å) and spin densities are in black and pink, respectively.

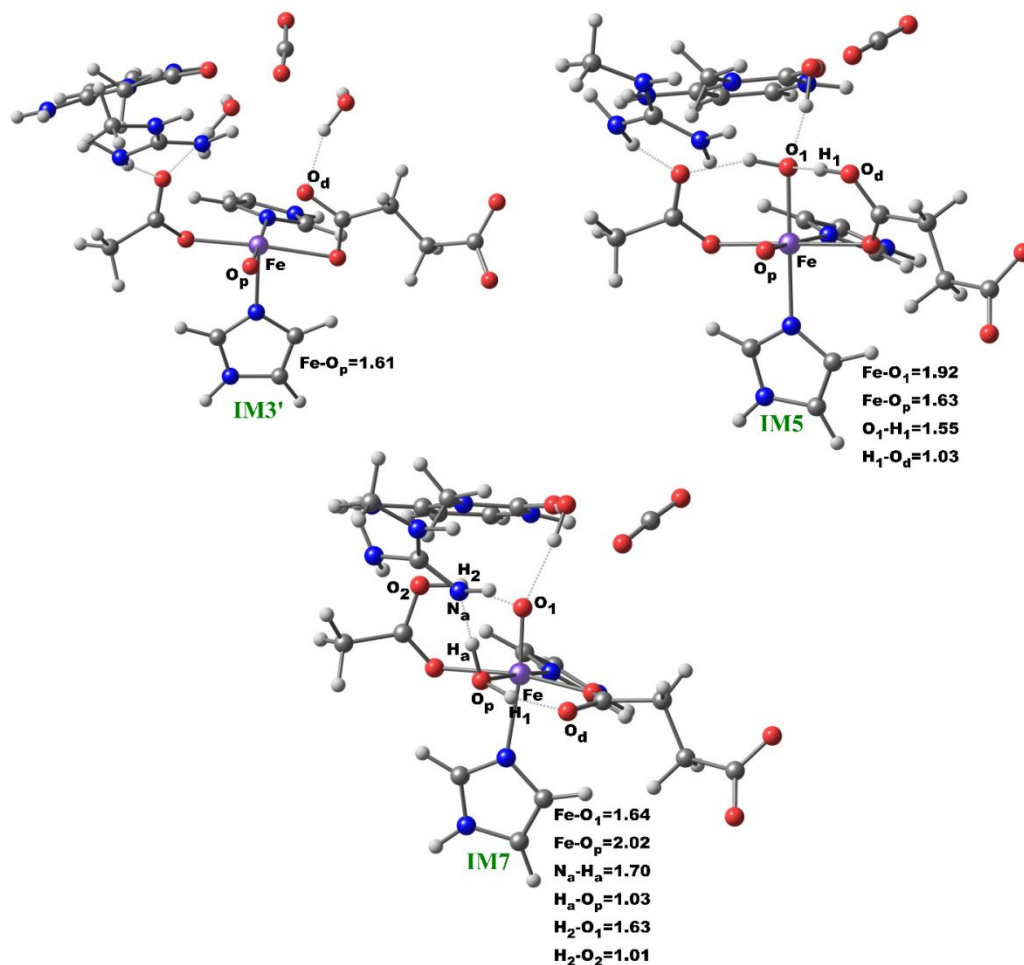

**Figure S32** The reaction state geometries (IM3', IM5 and IM7) for the proposed ferryl flip mechanism stationary points in AlkBH2-dsDNA. Distances are in Å.



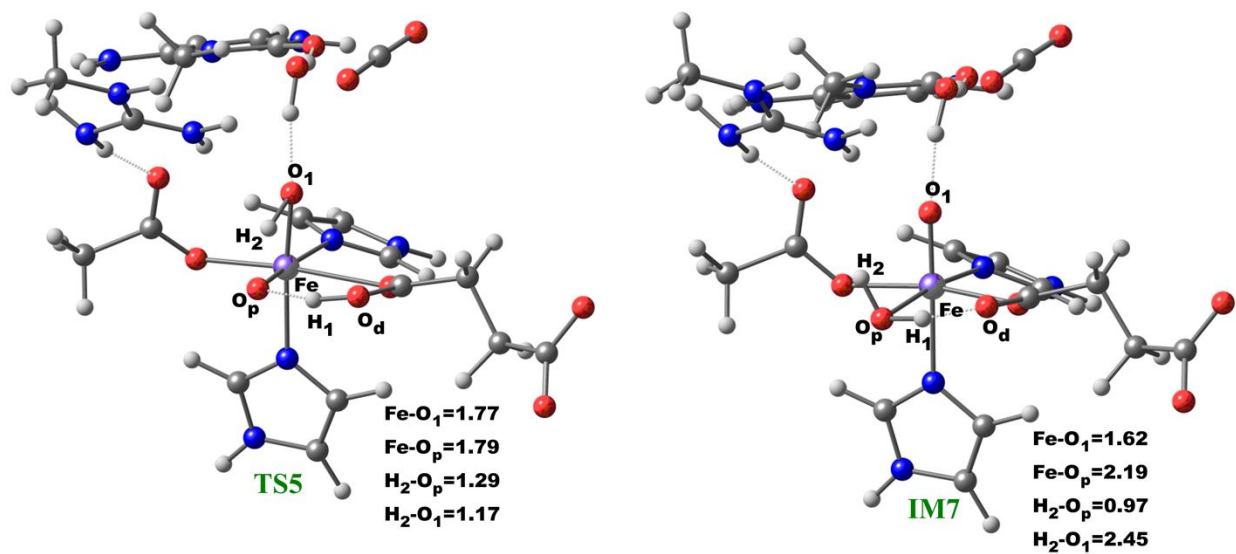

**Figure S33** The reaction state geometries for the proposed ferryl flip mechanism stationary points via the direct proton transfer from IM6 in the AlkBH2-dsDNA complex. Distances are in Å.

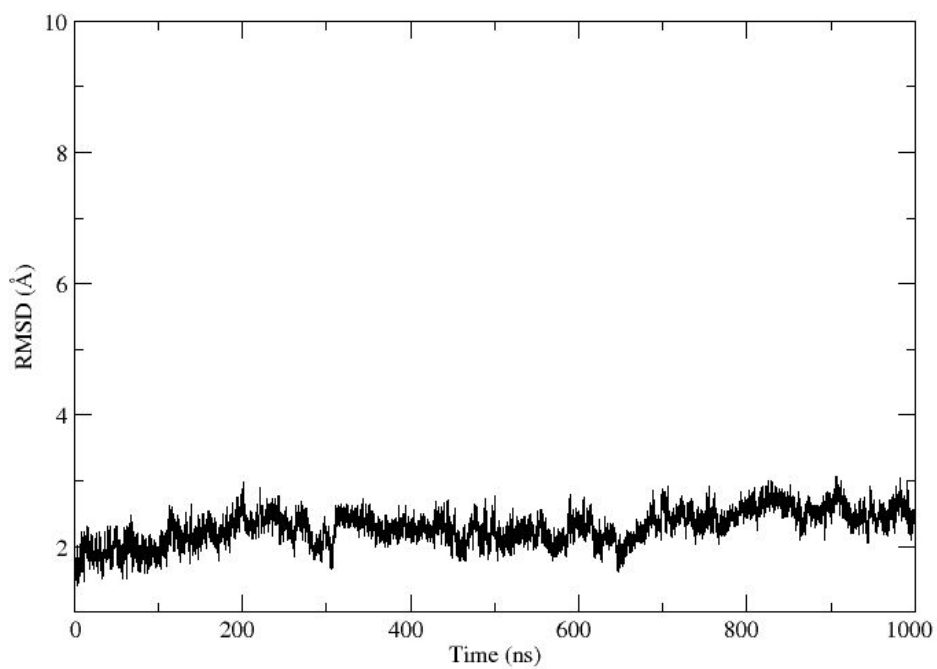

**Figure S34** RMSD plot for the Protein-DNA complex of AlkBH2-dsDNA Fe(II) five-coordinate enzyme-substrate complex MD Simulations.

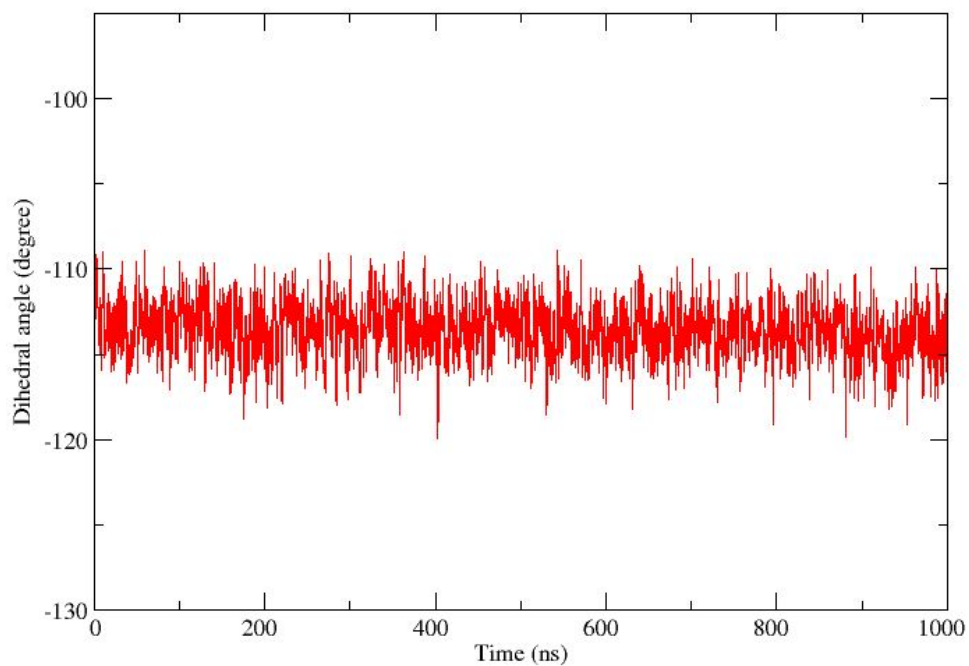

**Figure S35** The  $N^\epsilon$  (His<sup>1</sup>)-Fe-O5-O2 dihedral angle in AlkBH2-dsDNA Fe(II) five-coordinate enzyme-substrate complex MD Simulations.

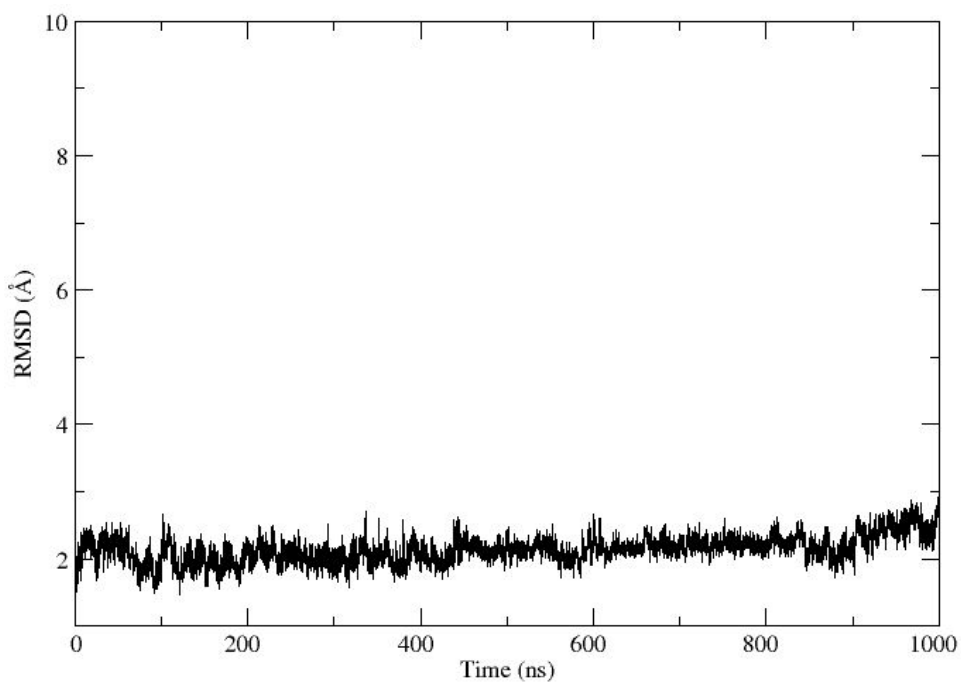

**Figure S36** RMSD plot for the Protein-DNA complex of AlkBH2-dsDNA “in-line” Fe(III)-superoxo complex MD simulations.

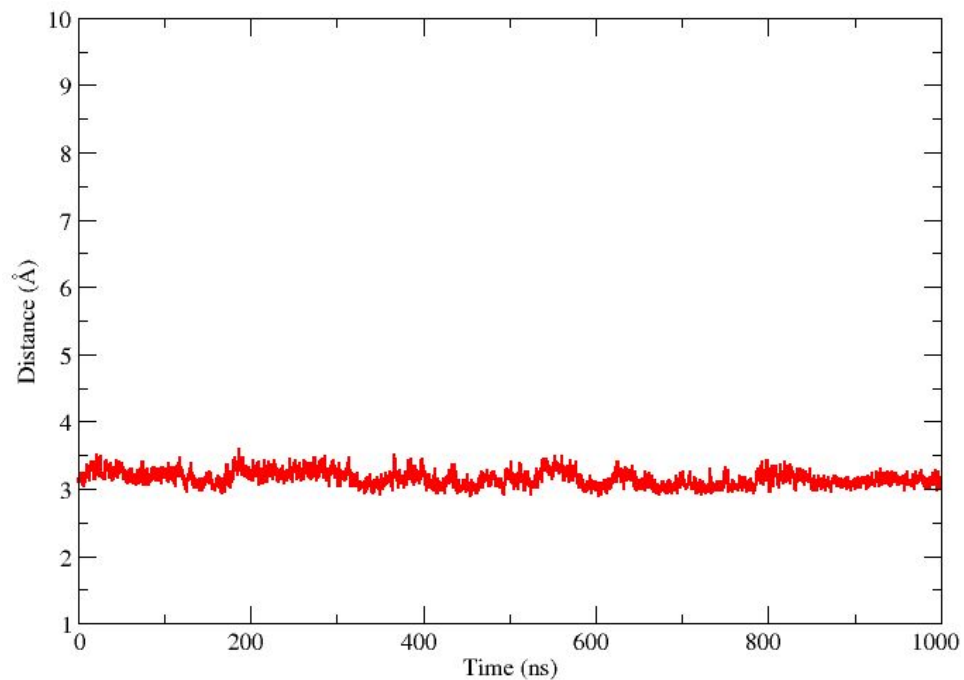

**Figure S37** The distance between distal oxygen ( $O_d$ ) of the superoxide and C2 of 2OG in AlkBH2-dsDNA “in-line” Fe(III)-superoxo complex MD simulations.

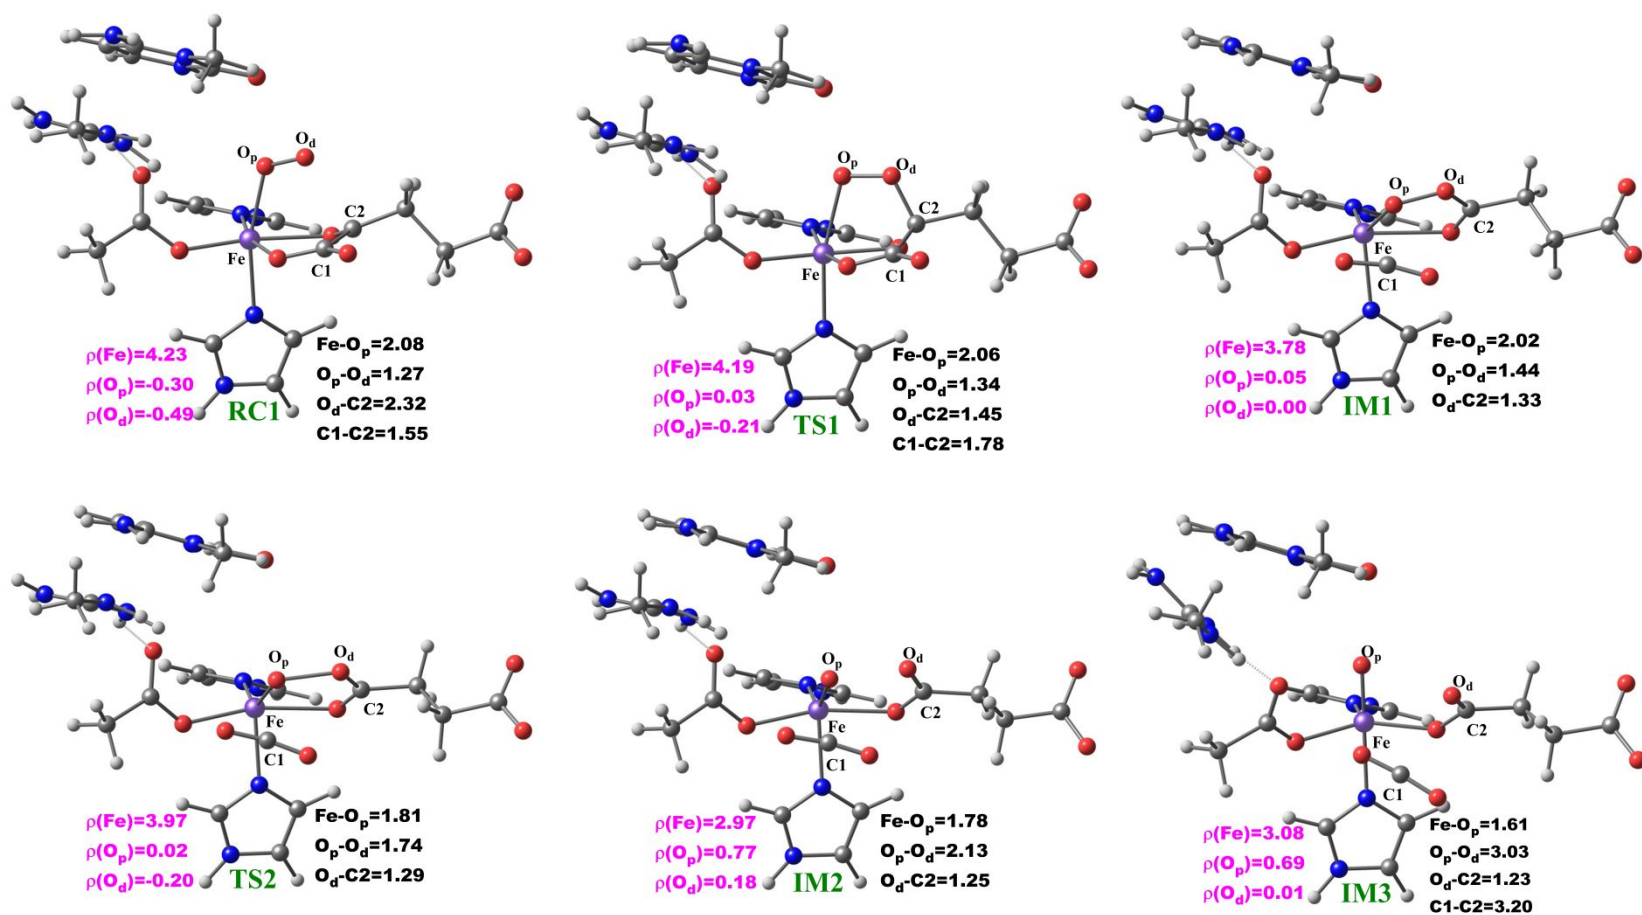

**Figure S38** The reaction state geometries of the dioxygen activation step stationary points of AlkBH2-dsDNA via ‘in-line’ Fe(III)-superoxo complex. Distances (Å) and spin densities are in black and pink, respectively.

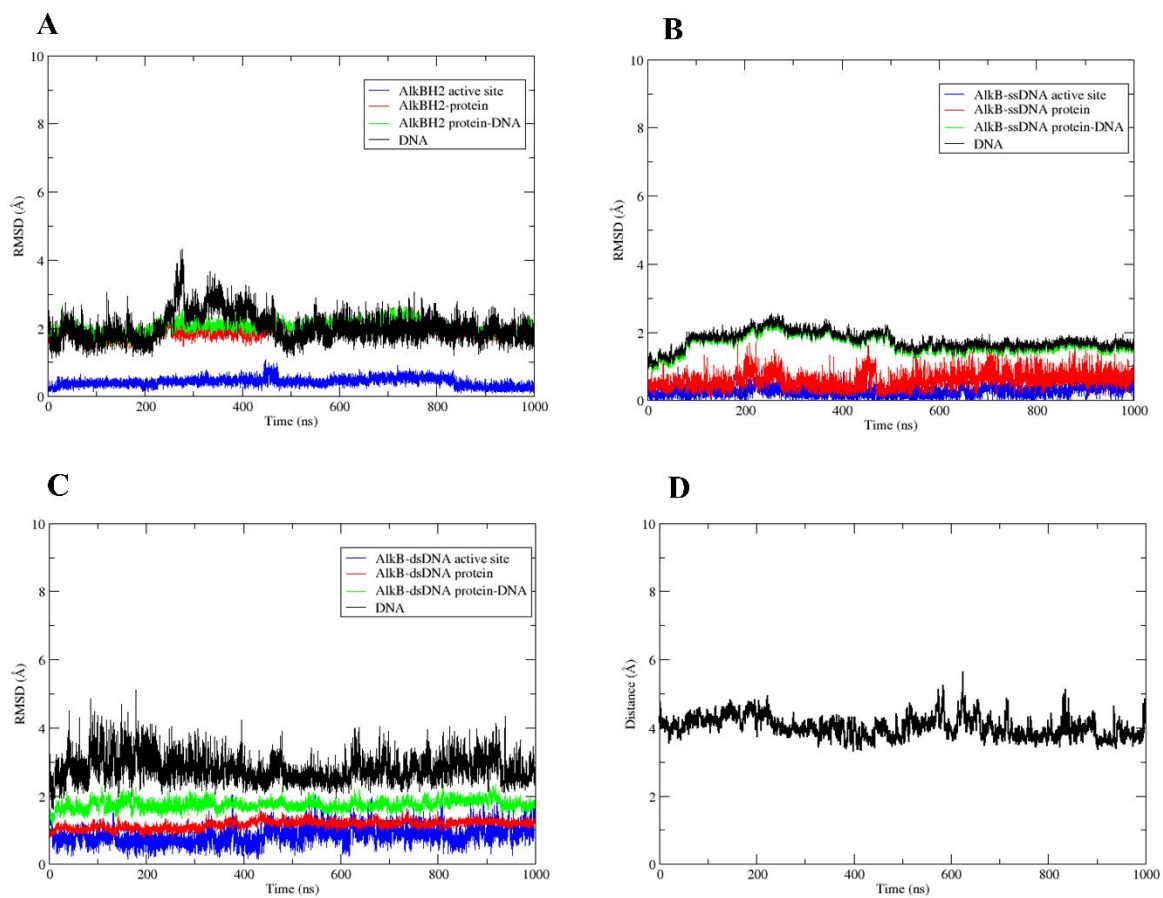

**Figure S39** RMSD Plots for AlkBH2-dsDNA (A), AlkB-ssDNA (B), AlkB-dsDNA (C) and plot of the distance between the proximal oxygen ( $O_p$ ) and the carbon of the methyl-group of  $m_3C$  (D) at the ferryl intermediate stage of the AlkBH2-dsDNA complex reaction.

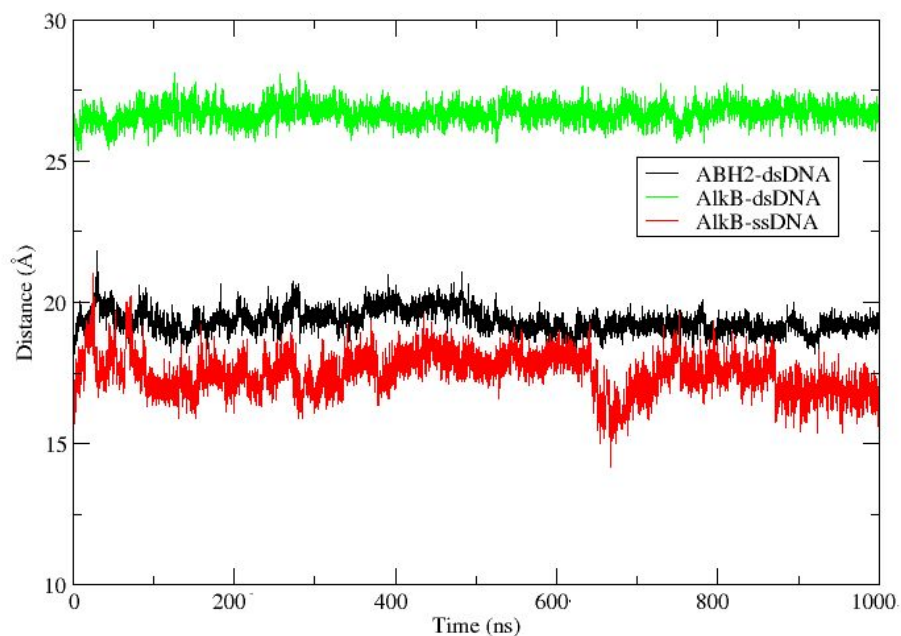

**Figure S40** The distance between the center of masses of the protein and the DNA in the AlkBH2-dsDNA, AlkB-ssDNA and AlkB-dsDNA complexes during the MD simulations of the ferryl complex.

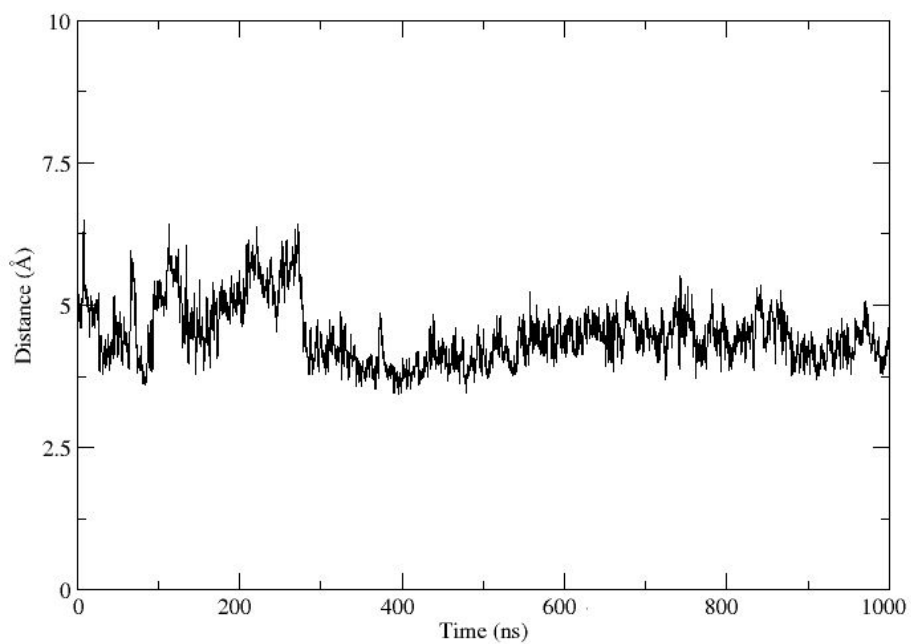

**Figure S41** Distance between proximal oxygen ( $O_p$ ) and the methyl carbon of  $m_3C$  DNA substrate in the AlkB-ssDNA ferryl complex MD simulations.

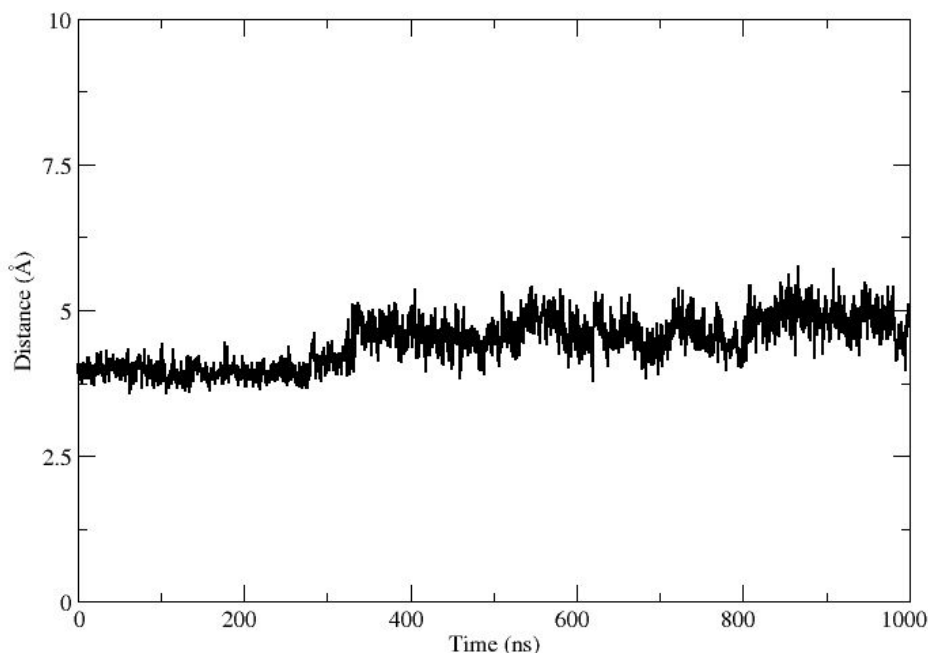

**Figure S42** Distance between the proximal oxygen ( $O_p$ ) and the methyl carbon of  $m_3C$  DNA substrate in the AlkB-dsDNA ferryl complex MD simulations.

Dynamic cross correlation analysis (DCCA) of AlkBH2-dsDNA (Figure 9A) shows that residues 95-101 ( $\beta 3$ ) and 103-108 ( $\beta 4$ ), belonging to a crystallographically observed  $\beta$ -hairpin,<sup>10,11</sup> have a strong positive correlation with residues 123-128; this aids in substrate recognition. Residues 166-175, located on the first strand of the double-stranded  $\beta$ -helix (DSBH) core fold, which includes the coordinating HXD motif, have a strong positive correlation with the Fe center, the oxo group of the  $Fe(IV)=O$  species, succinate, and DNA. This observation implies that these residues are important for the proper orientation of the reactive groups. Residues 151-173 (belonging to  $\beta 8$ ) and 178-190 (belonging to  $\beta 8$  and the loop connecting  $\beta 8$ - $\beta 9$ ) have a positive correlation with residues 234-255 ( $\beta 13$ - $\beta 14$ ) and 168-179 ( $\beta 12$  and  $\alpha 5$ ), respectively. Moreover, residues belonging to  $\beta 9$  (aa 182-188) and  $\beta 10$  (aa 193-202) have a positive correlation with residues belonging to  $\beta 14$  (aa 242-255) and  $\beta 13$  (aa 231-238), respectively.

DCCA calculations with AlkB-ssDNA (Figure S35) reveals that residues 122-136 located on the first strand of the DSBH, which include the coordinating HXD motif, have a strong positive correlation with the Fe center, the oxo group of the  $Fe(IV)=O$  species, succinate, and residues belonging to  $\alpha 3$  and  $\beta 11$  (aa 183-192). Residues 117-123 (in  $\beta 5$ ) and 143-150 (in  $\beta 7$ ) have a positive correlation with residues 203-209, which belong to  $\beta 12$  and the loop connecting  $\beta 11$  and  $\beta 12$ . Residues 142-157, belonging to  $\beta 7$ - $\beta 8$  have a positive correlation with residues 165-178 (in  $\beta 9$ ) and 185-192 (in  $\alpha 3$  and  $\beta 9$ ).

With AlkB-dsDNA (Figure S36), DCCA shows that residues 50-57 and 79-89, which belong to the nucleotide recognition lid, have a positive correlation with the DNA substrate. Residues 114-124 (in  $\beta 5$ ) and 121-136 (in  $\beta 5$  and  $\beta 6$ ) have a positive correlation with residues 203-211 (in  $\beta 12$ ) and 180-192 (in  $\beta 10$  and  $\beta 11$ ), respectively. Residues 129-136 located on the first strand of the DSBH, which includes the coordinating HXD motif, have a positive correlation with residues that belong to  $\beta 8$  (aa 158-162). Figures S15 and S16 contain the annotated secondary structures of AlkBH2-dsDNA and AlkBs, respectively.

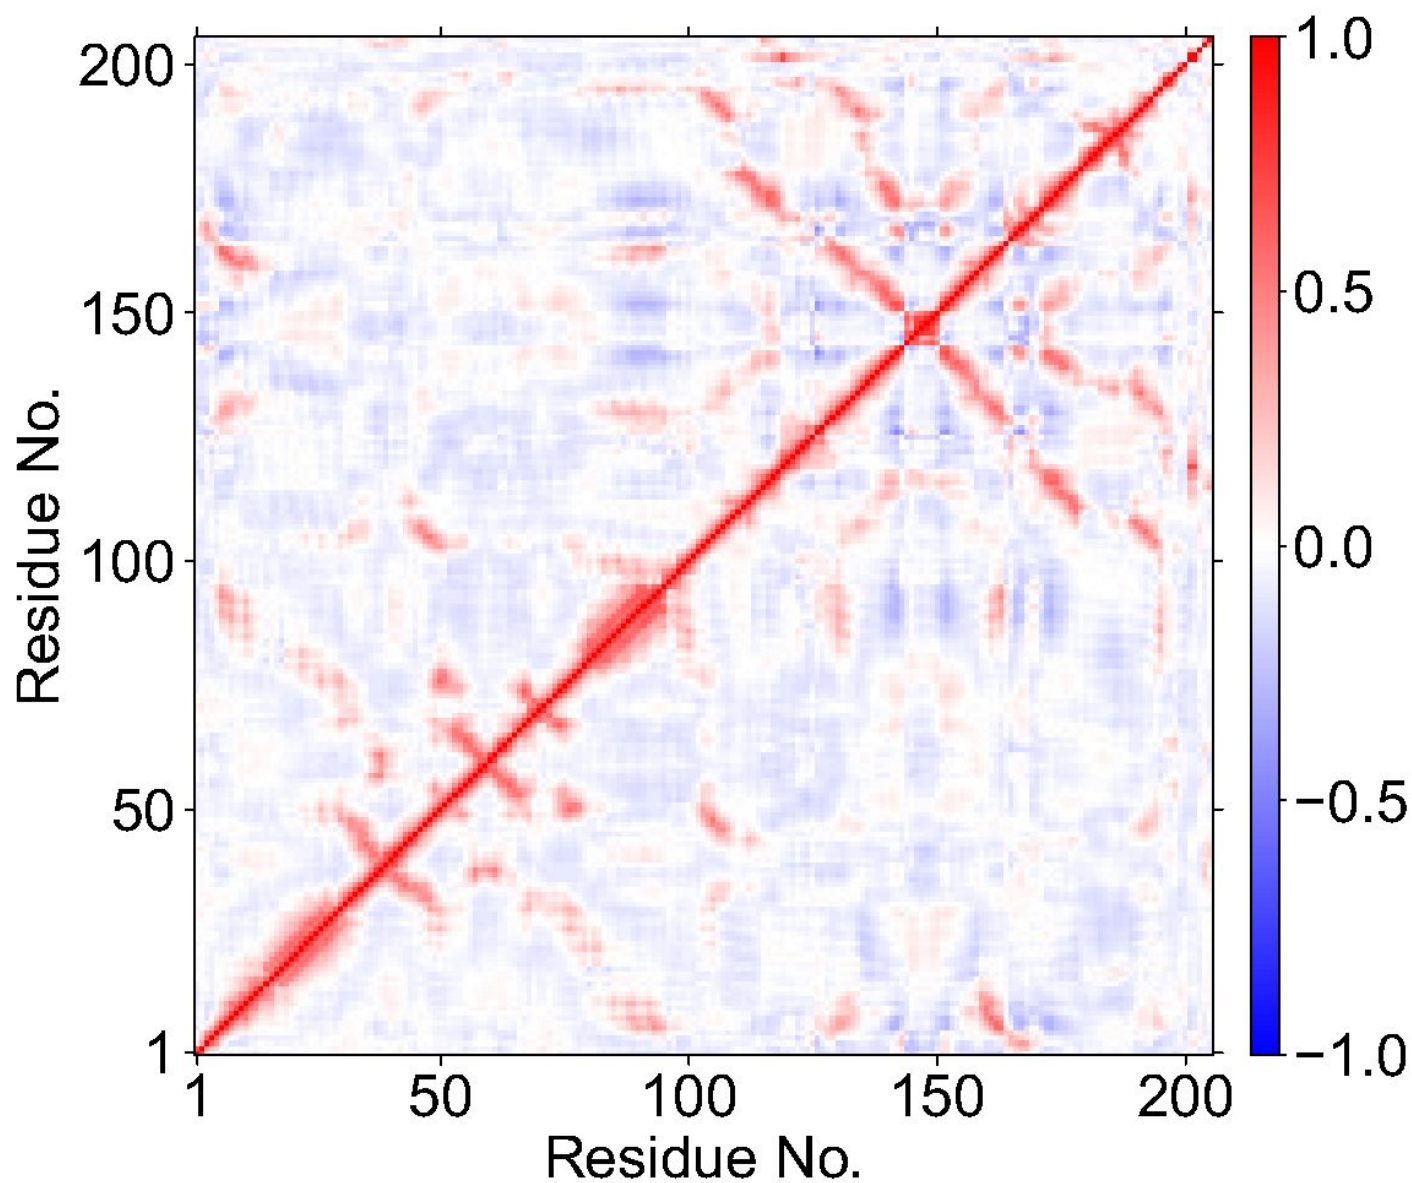

**Figure S43** Dynamic cross correlation for the ferryl complex of AlkB-ssDNA. Residue numbers 1-200 (protein), 201 (Fe), 202 (O), 203 (succinate), 204-206 (DNA), and 205 (m<sub>3</sub>C substrate).



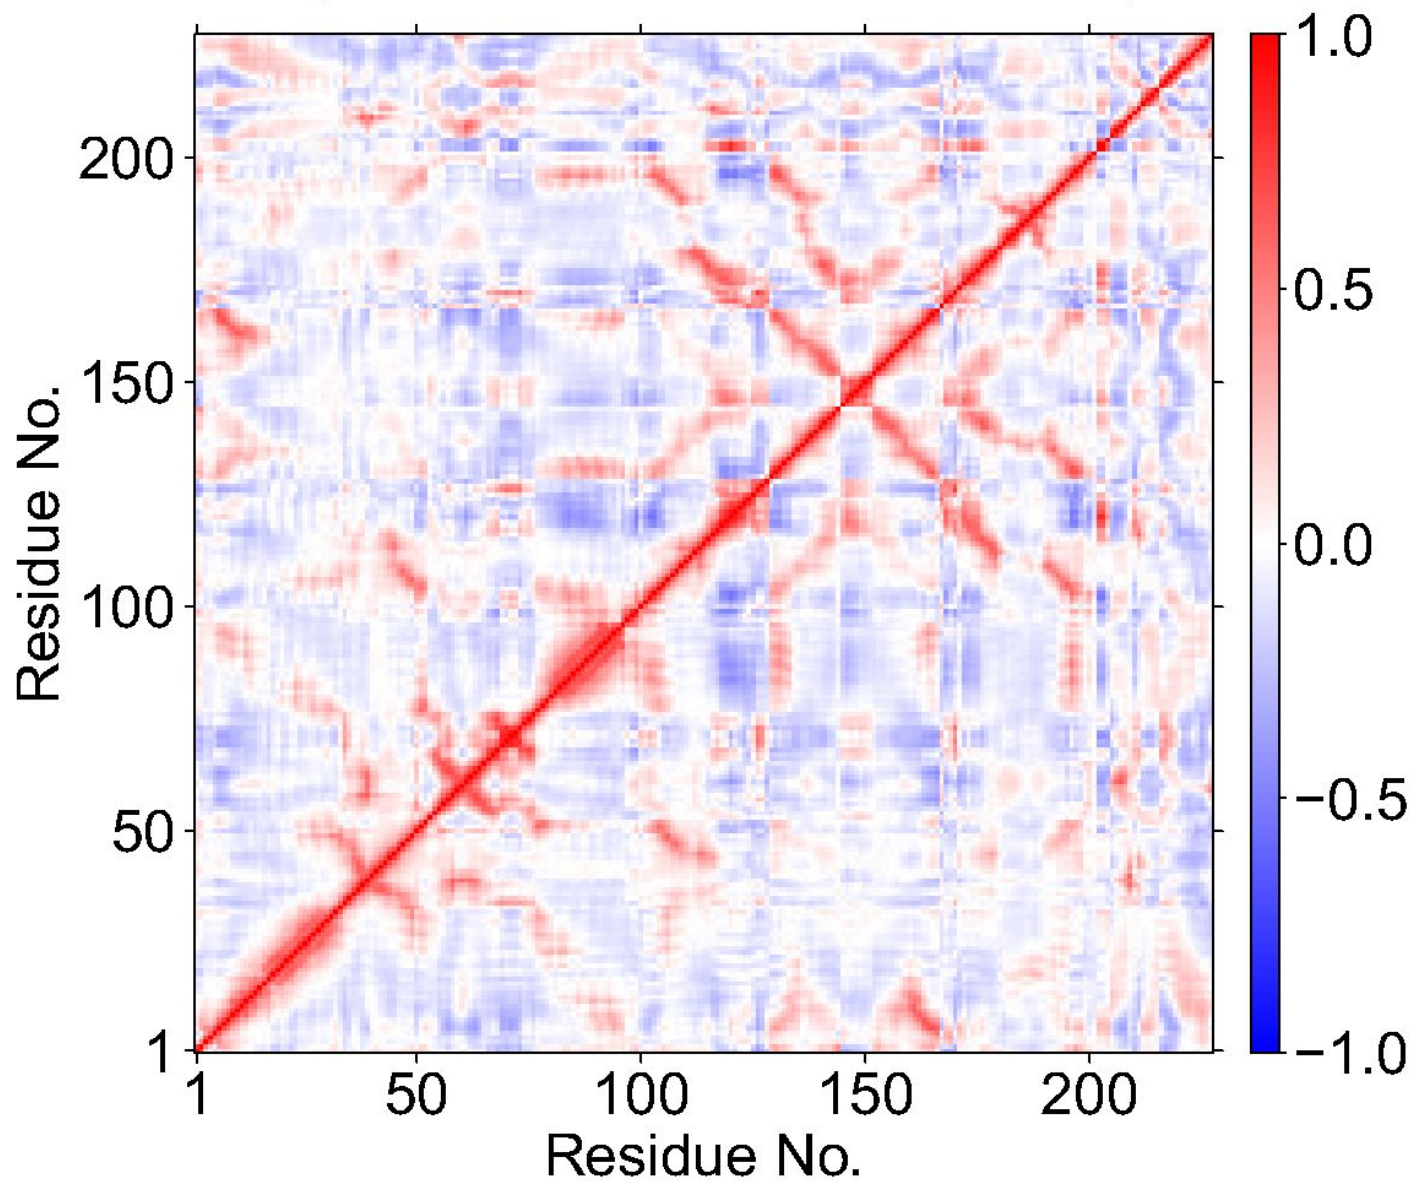

**Figure S44** Dynamic cross correlation for the ferryl complex of AlkB-dsDNA. Residue numbers 1-201 (protein), 202 (Fe), 203 (O), 204 (succinate), 205-229 (DNA), and 211 ( $m_3C$  substrate).

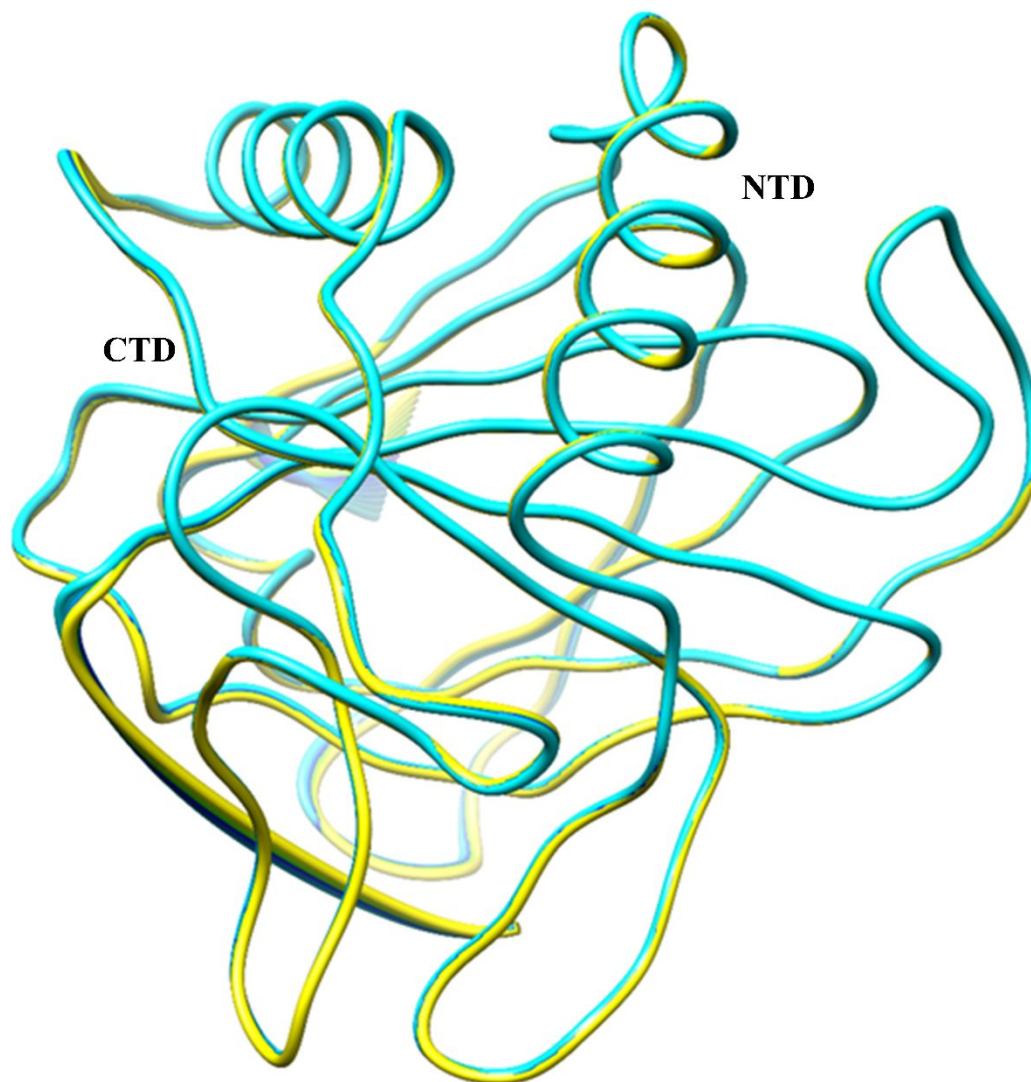

**Figure S45** PCA for the AlkB-ssDNA ferryl MD simulation. Yellow to blue coloring represents the main direction of motion of protein residues. NTD and CTD are N-terminal Domain and C-terminal Domain, respectively.

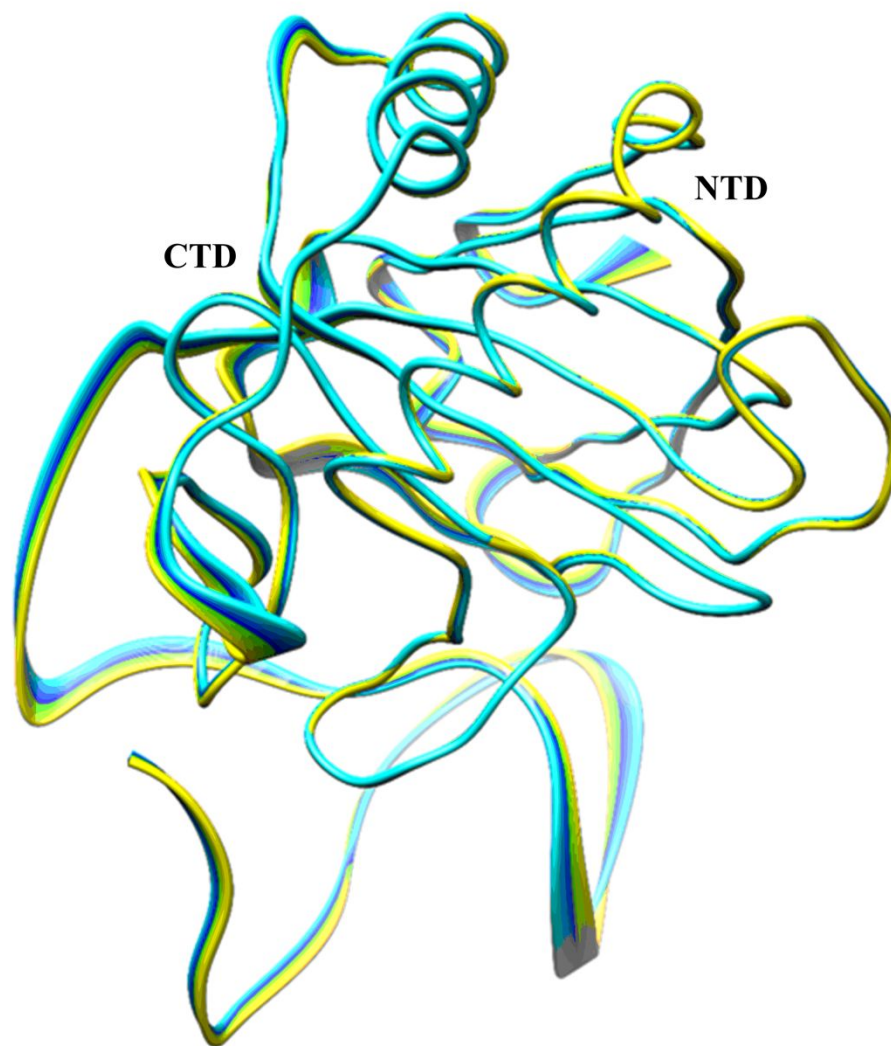

**Figure S46** PCA for the AlkB-dsDNA ferryl MD simulation. Yellow to blue coloring represents the main direction of motion of protein residues. NTD and CTD are N-terminal Domain and C-terminal Domain, respectively.

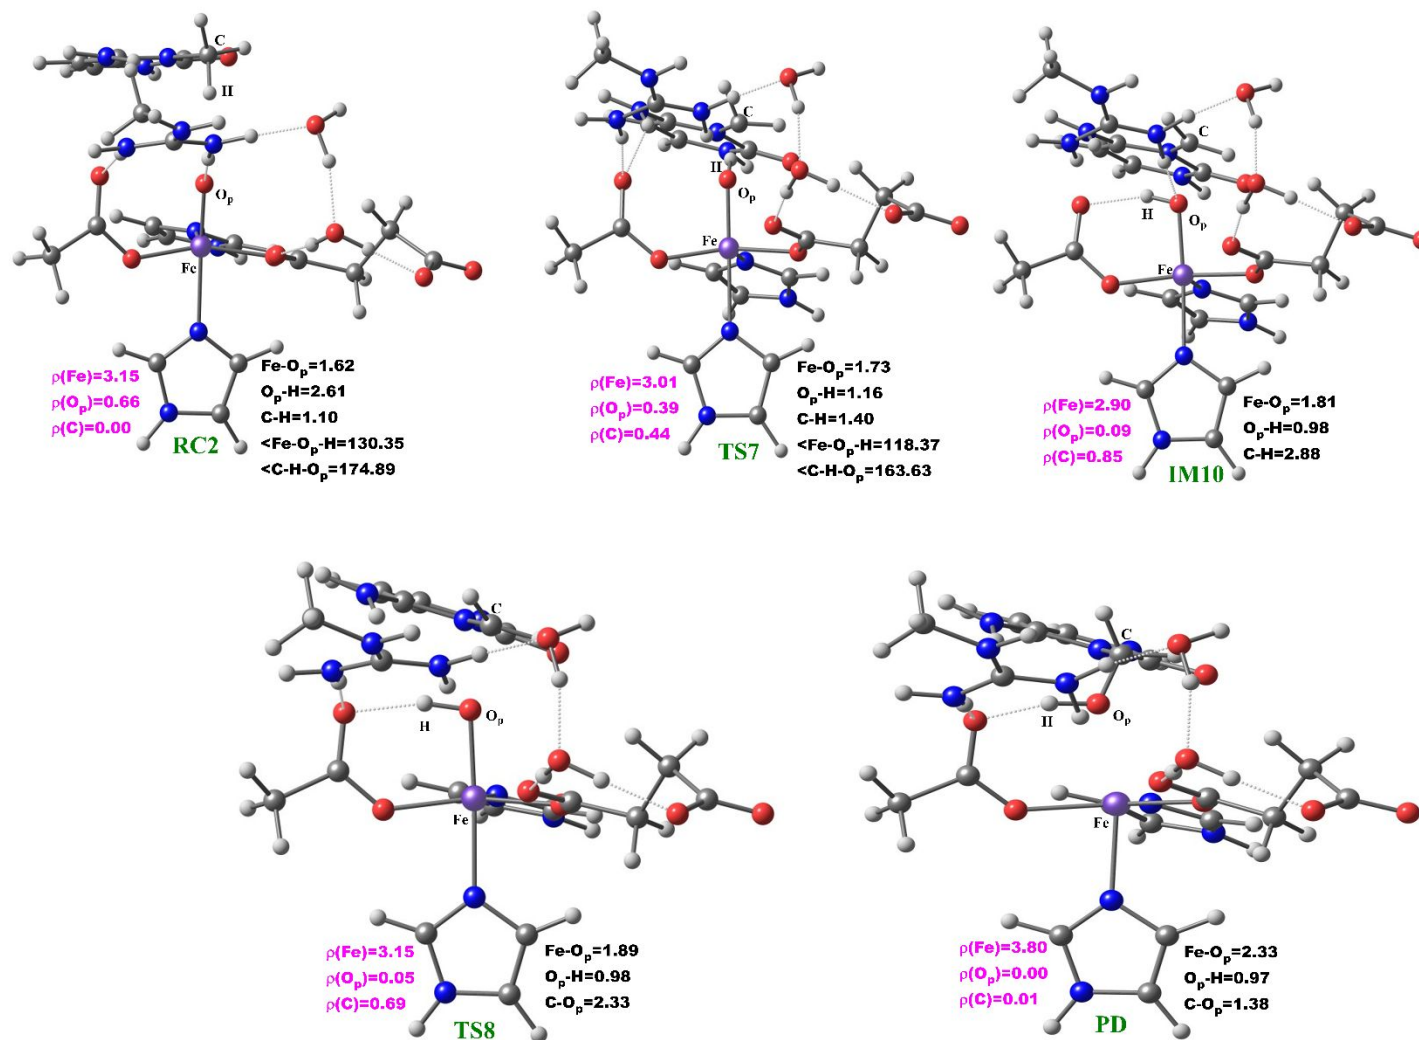

**Figure S47** The reaction state geometries of the hydrogen atom abstraction and rebound hydroxylation steps stationary points in AlkB-ssDNA. Distances (Å) and spin densities are in black and pink, respectively.

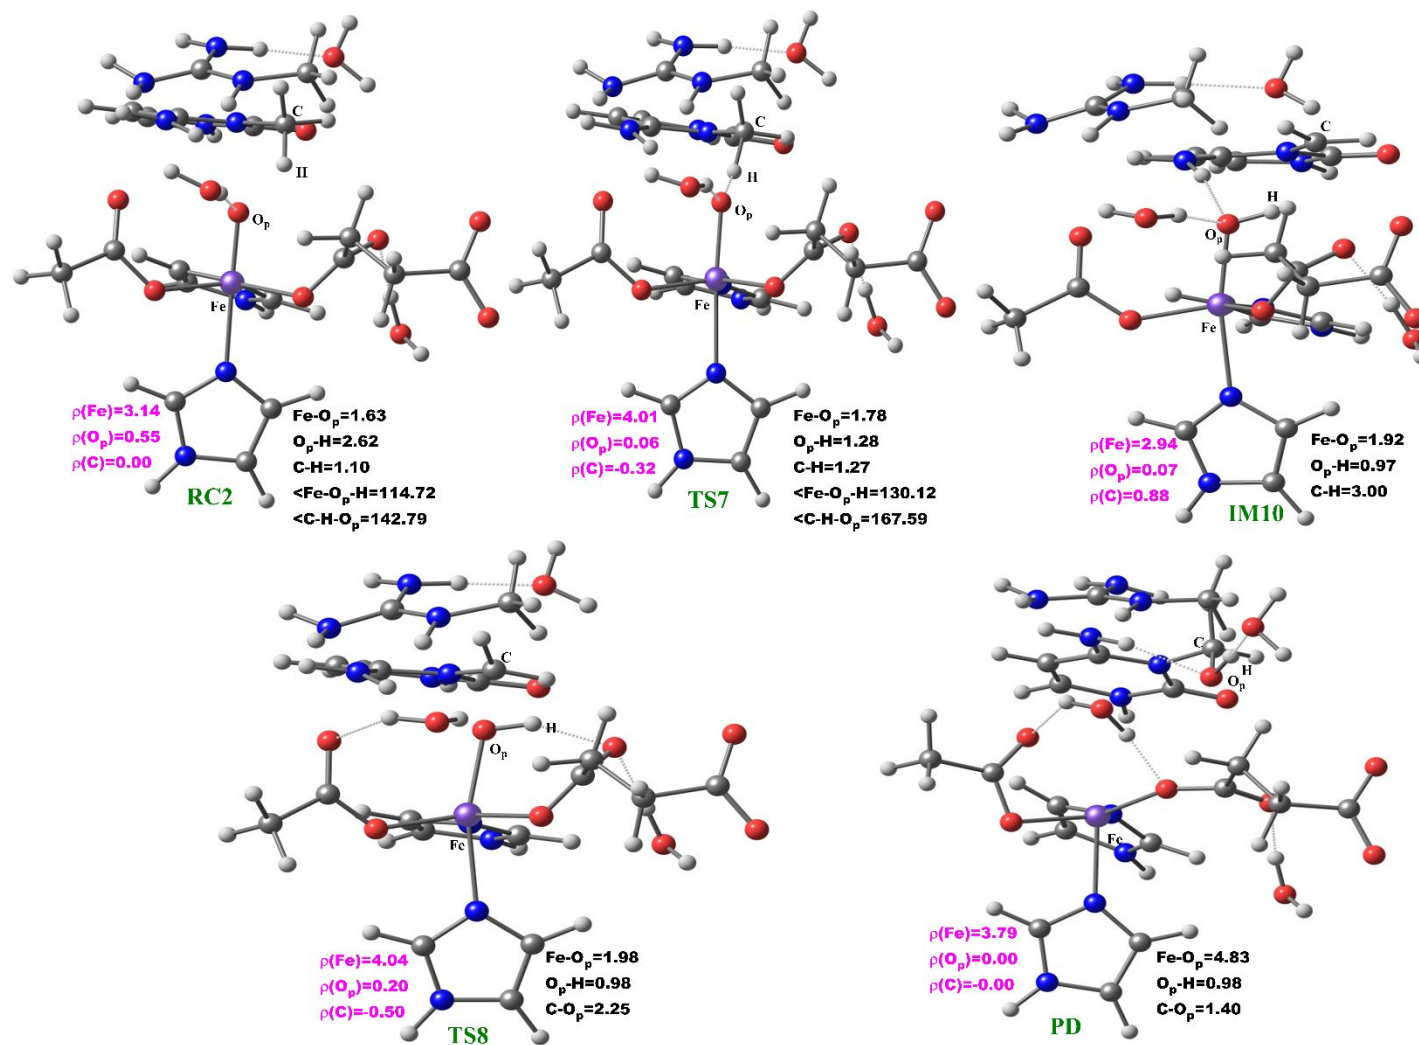

**Figure S48** The reaction state geometries of the hydrogen atom abstraction and rebound hydroxylation steps stationary points in AlkB-dsDNA. Distances ( $\text{\AA}$ ) and spin densities are in black and pink, respectively.

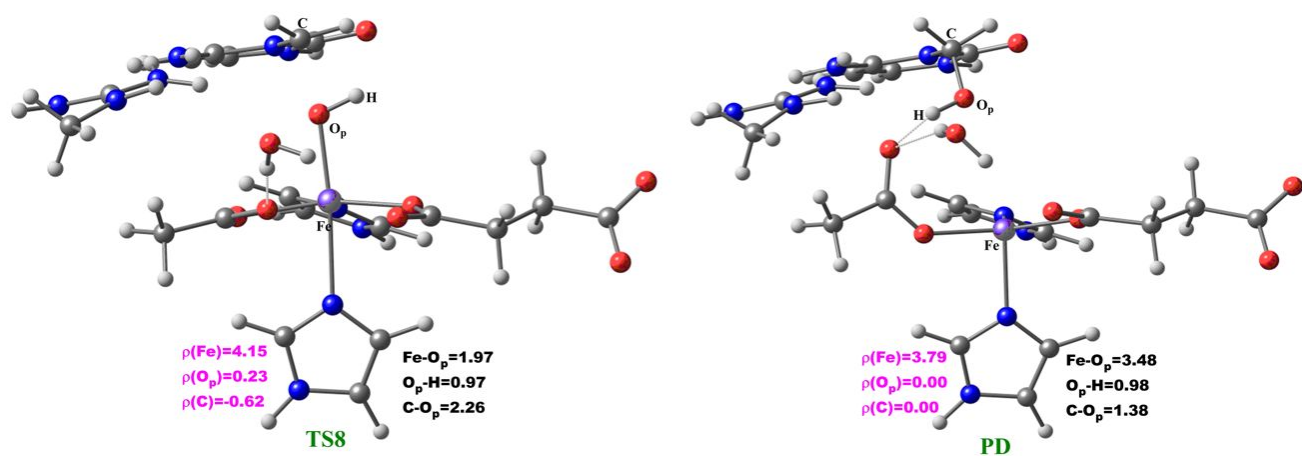

**Figure S49** Optimized geometries of the rebound hydroxylation stationary points in AlkBH2-dsDNA. Distances and angles are in Å and degrees, respectively.

**Table S1.** Calculated activation barriers (in kcal/mol) at B3LYP/def2-TZVP (BS2) for all the multiple snapshots with and without ZPE in the AlkB-ssDNA complex.

| Snapshot                          | Barrier (BS2) | Barrier (BS2+ZPE) |
|-----------------------------------|---------------|-------------------|
| 1.                                | 26.6          | 23.6              |
| 2.                                | 27.2          | 24.1              |
| 3.                                | 31.3          | 26.7              |
| 4.                                | 25.6          | 22.1              |
| 5.                                | 24.8          | 21.0              |
| <b>Boltzmann weighted average</b> | <b>25.6</b>   | <b>21.9</b>       |

**Table S2.** Selected distances and angles for the different snapshots RC2 and TS7 for HAT step in the AlkB-ssDNA complex, calculated at B3LYP/def2-TZVP.

|            | d(Fe–O <sub>p</sub> )<br>(Å) | d(O <sub>p</sub> –H)<br>(Å) | d(C–H)<br>(Å) | <(Fe–O <sub>p</sub> –H)<br>(deg) | <(C–H <sub>p</sub> –O)<br>(deg) | Barrier<br>with ZPE<br>(kcal/mol) | C <sub>substrate</sub><br>spin<br>density<br>in TS7 |
|------------|------------------------------|-----------------------------|---------------|----------------------------------|---------------------------------|-----------------------------------|-----------------------------------------------------|
| Snapshot 1 |                              |                             |               |                                  |                                 |                                   |                                                     |
| RC2        | 1.623                        | 2.472                       | 1.099         | 137.46                           | 175.36                          | 23.6                              | -0.356                                              |
| TS7        | 1.775                        | 1.254                       | 1.293         | 140.45                           | 169.59                          |                                   |                                                     |
| Snapshot 2 |                              |                             |               |                                  |                                 |                                   |                                                     |
| RC2        | 1.622                        | 2.468                       | 1.101         | 123.22                           | 142.43                          | 24.1                              | 0.418                                               |
| TS7        | 1.735                        | 1.191                       | 1.377         | 121.88                           | 165.21                          |                                   |                                                     |
| Snapshot 3 |                              |                             |               |                                  |                                 |                                   |                                                     |
| RC2        | 1.626                        | 3.344                       | 1.101         | 125.10                           | 144.26                          | 26.7                              | 0.465                                               |
| TS7        | 1.726                        | 1.161                       | 1.404         | 120.04                           | 173.05                          |                                   |                                                     |
| Snapshot 4 |                              |                             |               |                                  |                                 |                                   |                                                     |
| RC2        | 1.627                        | 2.605                       | 1.103         | 130.35                           | 174.89                          | 22.1                              | 0.439                                               |
| TS7        | 1.729                        | 1.163                       | 1.400         | 118.37                           | 163.63                          |                                   |                                                     |
| Snapshot 5 |                              |                             |               |                                  |                                 |                                   |                                                     |
| RC2        | 1.621                        | 2.831                       | 1.103         | 128.44                           | 172.09                          | 21.0                              | -0.366                                              |
| TS7        | 1.749                        | 1.232                       | 1.295         | 145.55                           | 168.20                          |                                   |                                                     |

**Table S3.** Calculated activation barriers (in kcal/mol) at B3LYP/def2-TZVP (BS2) for all the multiple snapshots with and without ZPE in the AlkB-dsDNA complex.

| Snapshot                          | Barrier (BS2) | Barrier (BS2+ZPE) |
|-----------------------------------|---------------|-------------------|
| 1.                                | 26.2          | 23.6              |
| 2.                                | 24.1          | 21.5              |
| 3.                                | 25.6          | 22.1              |
| 4.                                | 27.4          | 24.9              |
| 5.                                | 29.0          | 25.3              |
| <b>Boltzmann weighted average</b> | <b>25.1</b>   | <b>22.3</b>       |

**Table S4.** Selected distances and angles for the different snapshots RC2 and TS7 for HAT step in the AlkB-dsDNA complex, calculated at B3LYP/def2-TZVP.

|            | d(Fe–O <sub>p</sub> )<br>(Å) | d(O <sub>p</sub> –H)<br>(Å) | d(C–H)<br>(Å) | <(Fe–O <sub>p</sub> –<br>H) (deg) | <(C–H <sub>p</sub> –<br>O) (deg) | Barrier<br>with ZPE<br>(kcal/mol) | C <sub>substrate</sub><br>spin<br>density<br>in TS7 |
|------------|------------------------------|-----------------------------|---------------|-----------------------------------|----------------------------------|-----------------------------------|-----------------------------------------------------|
| Snapshot 1 |                              |                             |               |                                   |                                  |                                   |                                                     |
| RC2        | 1.611                        | 3.258                       | 1.103         | 126.24                            | 153.66                           | 23.6                              | -0.342                                              |
| TS7        | 1.748                        | 1.269                       | 1.279         | 139.91                            | 175.39                           |                                   |                                                     |
| Snapshot 2 |                              |                             |               |                                   |                                  |                                   |                                                     |
| RC2        | 1.622                        | 2.603                       | 1.103         | 127.49                            | 175.45                           | 21.5                              | -0.324                                              |
| TS7        | 1.772                        | 1.296                       | 1.263         | 129.88                            | 168.70                           |                                   |                                                     |
| Snapshot 3 |                              |                             |               |                                   |                                  |                                   |                                                     |
| RC2        | 1.633                        | 2.620                       | 1.101         | 114.72                            | 142.79                           | 22.1                              | -0.330                                              |
| TS7        | 1.781                        | 1.279                       | 1.269         | 130.12                            | 167.59                           |                                   |                                                     |
| Snapshot 4 |                              |                             |               |                                   |                                  |                                   |                                                     |
| RC2        | 1.615                        | 3.292                       | 1.099         | 118.94                            | 144.01                           | 24.9                              | -0.314                                              |
| TS7        | 1.783                        | 1.306                       | 1.273         | 138.81                            | 165.12                           |                                   |                                                     |
| Snapshot 5 |                              |                             |               |                                   |                                  |                                   |                                                     |
| RC2        | 1.627                        | 2.874                       | 1.099         | 115.41                            | 154.39                           | 25.3                              | -0.323                                              |
| TS7        | 1.772                        | 1.309                       | 1.275         | 133.70                            | 168.83                           |                                   |                                                     |



**Table S5.** Calculated pKa values of the ionisable side chains of AlkBH2-dsDNA, AlkB-ssDNA and AlkB-dsDNA, done using Propka software. The yellow highlighted ones are the iron-coordinating residues.

| AlkBH2-dsDNA |       |          | AlkB-ssDNA |       |          | AlkB-dsDNA |       |          |
|--------------|-------|----------|------------|-------|----------|------------|-------|----------|
| Residues     | pKa   | pK model | Residues   | pKa   | pK model | Residues   | pKa   | pK model |
| ASP 66       | 3.28  | 3.80     | ASP 36     | 3.05  | 3.80     | ASP 36     | 3.03  | 3.80     |
| ASP 79       | 1.92  | 3.80     | ASP 39     | 4.20  | 3.80     | ASP 39     | 4.21  | 3.80     |
| ASP 117      | 3.43  | 3.80     | ASP 82     | 1.70  | 3.80     | ASP 82     | 1.78  | 3.80     |
| ASP 143      | 3.72  | 3.80     | ASP 111    | 3.94  | 3.80     | ASP 111    | 3.98  | 3.80     |
| ASP 163      | 2.97  | 3.80     | ASP 115    | 4.16  | 3.80     | ASP 115    | 4.11  | 3.80     |
| ASP 166      | 4.37  | 3.80     | ASP 133    | -2.93 | 3.80     | ASP 133    | -2.79 | 3.80     |
| ASP 173      | -2.44 | 3.80     | ASP 135    | 5.28  | 3.80     | ASP 135    | 6.83  | 3.80     |
| ASP 174      | 4.97  | 3.80     | ASP 138    | 1.31  | 3.80     | ASP 138    | 1.66  | 3.80     |
| ASP 194      | 3.31  | 3.80     | ASP 163    | 3.35  | 3.80     | ASP 163    | 3.18  | 3.80     |
| ASP 201      | 3.40  | 3.80     | ASP 174    | 4.03  | 3.80     | ASP 174    | 3.98  | 3.80     |
| GLU 63       | 4.26  | 4.50     | ASP 202    | 2.87  | 3.80     | ASP 202    | 3.75  | 3.80     |
| GLU 77       | 3.70  | 4.50     | GLU 31     | 4.51  | 4.50     | GLU 31     | 4.54  | 4.50     |
| GLU 80       | 4.61  | 4.50     | GLU 136    | 3.89  | 4.50     | GLU 136    | 3.87  | 4.50     |
| GLU 84       | 4.89  | 4.50     | GLU 171    | 3.81  | 4.50     | GLU 171    | 4.65  | 4.50     |
| GLU 86       | 3.61  | 4.50     | GLU 181    | 4.67  | 4.50     | GLU 181    | 4.63  | 4.50     |
| GLU 88       | 3.88  | 4.50     | HIS 66     | 6.35  | 6.50     | HIS 66     | 6.42  | 6.50     |
| GLU 90       | 4.55  | 4.50     | HIS 72     | 6.11  | 6.50     | HIS 72     | 5.52  | 6.50     |
| GLU 139      | 4.77  | 4.50     | HIS 97     | 6.49  | 6.50     | HIS 97     | 5.91  | 6.50     |
| GLU 170      | 5.39  | 4.50     | HIS 131    | -1.92 | 6.50     | HIS 131    | -1.92 | 6.50     |
| GLU 175      | 8.44  | 4.50     | HIS 172    | 4.58  | 6.50     | HIS 172    | 4.34  | 6.50     |
| GLU 177      | 4.48  | 4.50     | HIS 187    | 0.85  | 6.50     | HIS 187    | 0.72  | 6.50     |
| HIS 55       | 6.05  | 6.50     | HIS 197    | 5.38  | 6.50     | HIS 197    | 5.30  | 6.50     |
| HIS 59       | 5.96  | 6.50     | CYS 64     | 9.22  | 9.00     | CYS 64     | 9.25  | 9.00     |
| HIS 106      | 4.51  | 6.50     | CYS 100    | 13.18 | 9.00     | CYS 100    | 13.07 | 9.00     |
| HIS 144      | 5.65  | 6.50     | CYS 117    | 18.79 | 9.00     | CYS 117    | 18.84 | 9.00     |
| HIS 167      | 3.68  | 6.50     | CYS 203    | 11.44 | 9.00     | CYS 203    | 10.66 | 9.00     |
| HIS 171      | -2.32 | 6.50     | TYR 55     | 10.20 | 10.00    | TYR 55     | 10.34 | 10.00    |
| HIS 199      | 5.61  | 6.50     | TYR 76     | 12.92 | 10.00    | TYR 76     | 15.62 | 10.00    |
| HIS 220      | 6.36  | 6.50     | TYR 78     | 15.22 | 10.00    | TYR 78     | 16.21 | 10.00    |
| HIS 228      | 6.13  | 6.50     | TYR 109    | 11.36 | 10.00    | TYR 109    | 11.40 | 10.00    |
| HIS 233      | 5.75  | 6.50     | TYR 122    | 12.54 | 10.00    | TYR 122    | 12.52 | 10.00    |
| HIS 236      | 0.57  | 6.50     | TYR 186    | 10.12 | 10.00    | TYR 186    | 11.44 | 10.00    |
| CYS 169      | 13.72 | 9.00     | TYR 205    | 11.44 | 10.00    | TYR 205    | 12.44 | 10.00    |
| TYR 69       | 9.89  | 10.00    | LYS 87     | 10.37 | 10.50    | LYS 87     | 10.38 | 10.50    |
| TYR 91       | 13.29 | 10.00    | LYS 127    | 10.17 | 10.50    | LYS 127    | 9.54  | 10.50    |
| TYR 115      | 11.08 | 10.00    | LYS 134    | 10.33 | 10.50    | LYS 134    | 9.21  | 10.50    |
| TYR 122      | 16.56 | 10.00    | LYS 160    | 10.61 | 10.50    | LYS 160    | 10.67 | 10.50    |
| TYR 161      | 11.60 | 10.00    | LYS 166    | 10.25 | 10.50    | LYS 166    | 10.14 | 10.50    |
| TYR 235      | 11.21 | 10.00    | LYS 193    | 10.27 | 10.50    | LYS 193    | 10.33 | 10.50    |
| LYS 75       | 11.50 | 10.50    | LYS 214    | 10.53 | 10.50    | LYS 214    | 10.56 | 10.50    |

|         |       |       |         |       |       |         |       |       |
|---------|-------|-------|---------|-------|-------|---------|-------|-------|
| LYS 87  | 11.32 | 10.50 | ARG 23  | 12.35 | 12.50 | ARG 23  | 12.47 | 12.50 |
| LYS 104 | 10.18 | 10.50 | ARG 24  | 13.82 | 12.50 | ARG 24  | 12.65 | 12.50 |
| LYS 111 | 10.13 | 10.50 | ARG 35  | 12.41 | 12.50 | ARG 35  | 12.40 | 12.50 |
| LYS 132 | 9.92  | 10.50 | ARG 47  | 12.73 | 12.50 | ARG 47  | 12.66 | 12.50 |
| LYS 162 | 11.33 | 10.50 | ARG 73  | 12.41 | 12.50 | ARG 73  | 12.41 | 12.50 |
| LYS 200 | 10.08 | 10.50 | ARG 102 | 12.22 | 12.50 | ARG 102 | 12.04 | 12.50 |
| LYS 242 | 10.02 | 10.50 | ARG 121 | 12.28 | 12.50 | ARG 121 | 12.15 | 12.50 |
| LYS 243 | 10.18 | 10.50 | ARG 140 | 14.01 | 12.50 | ARG 140 | 14.08 | 12.50 |
| LYS 255 | 10.28 | 10.50 | ARG 161 | 12.56 | 12.50 | ARG 161 | 9.67  | 12.50 |
| ARG 58  | 12.20 | 12.50 | ARG 167 | 12.23 | 12.50 | ARG 167 | 11.43 | 12.50 |
| ARG 61  | 12.49 | 12.50 | ARG 183 | 12.17 | 12.50 | ARG 183 | 12.37 | 12.50 |
| ARG 98  | 12.20 | 12.50 | ARG 204 | 10.43 | 12.50 | ARG 204 | 10.37 | 12.50 |
| ARG 110 | 9.61  | 12.50 | ARG 210 | 13.09 | 12.50 | ARG 210 | 12.86 | 12.50 |
| ARG 140 | 13.36 | 12.50 |         |       |       |         |       |       |
| ARG 142 | 12.53 | 12.50 |         |       |       |         |       |       |
| ARG 160 | 13.99 | 12.50 |         |       |       |         |       |       |
| ARG 172 | 12.90 | 12.50 |         |       |       |         |       |       |
| ARG 176 | 12.40 | 12.50 |         |       |       |         |       |       |
| ARG 193 | 10.55 | 12.50 |         |       |       |         |       |       |
| ARG 198 | 11.52 | 12.50 |         |       |       |         |       |       |
| ARG 203 | 13.06 | 12.50 |         |       |       |         |       |       |
| ARG 209 | 12.67 | 12.50 |         |       |       |         |       |       |
| ARG 210 | 12.42 | 12.50 |         |       |       |         |       |       |
| ARG 215 | 11.95 | 12.50 |         |       |       |         |       |       |
| ARG 241 | 12.34 | 12.50 |         |       |       |         |       |       |
| ARG 248 | 9.14  | 12.50 |         |       |       |         |       |       |
| ARG 254 | 11.60 | 12.50 |         |       |       |         |       |       |

**Dioxygen activation step reaction states cartesian coordinates for AlkBH2-dsDNA via "off-line" Fe(III)-superoxo complex**

**RC1**

**QM/MM (BS1) = -3428.050920 a.u.**

**QM/MM (BS2+ZPE) = -3430.055821 a.u.**

|    |              |              |              |
|----|--------------|--------------|--------------|
| 6  | 35.034000670 | 35.287516737 | 30.406645110 |
| 7  | 35.821561871 | 34.925606648 | 31.473095110 |
| 1  | 36.553334286 | 34.199392415 | 31.464118374 |
| 6  | 35.447607248 | 35.644997988 | 32.538496132 |
| 1  | 35.903135576 | 35.554584948 | 33.520444235 |
| 7  | 34.442880118 | 36.461713919 | 32.221215069 |
| 6  | 34.172002941 | 36.244116631 | 30.886910178 |
| 1  | 33.369134589 | 36.764262364 | 30.374786454 |
| 6  | 29.304433005 | 38.355113365 | 31.673558766 |
| 1  | 28.870761713 | 37.641242709 | 32.388046341 |
| 1  | 28.831623859 | 39.337546432 | 31.820975424 |
| 6  | 30.804472962 | 38.505349246 | 31.895490216 |
| 8  | 31.373756464 | 39.568148262 | 31.588446675 |
| 8  | 31.416967846 | 37.509569492 | 32.440548858 |
| 6  | 32.325054224 | 33.056485971 | 34.489161986 |
| 7  | 31.265987623 | 33.375302029 | 33.671461474 |
| 1  | 30.520675118 | 32.760388445 | 33.318334759 |
| 6  | 31.347204954 | 34.676592620 | 33.356268015 |
| 1  | 30.637743361 | 35.204117318 | 32.724816161 |
| 7  | 32.408441446 | 35.226024430 | 33.934444564 |
| 6  | 33.033355914 | 34.224737788 | 34.643448942 |
| 1  | 33.954028784 | 34.405889892 | 35.191208996 |
| 6  | 29.317154511 | 44.311490844 | 33.742325652 |
| 1  | 29.581742892 | 45.258307123 | 33.239546839 |
| 1  | 28.631002752 | 43.756162952 | 33.088128553 |
| 7  | 30.501276544 | 43.511944836 | 34.020546761 |
| 1  | 31.121765497 | 43.809816889 | 34.775431421 |
| 6  | 30.867811848 | 42.376611357 | 33.379247384 |
| 7  | 30.173291109 | 41.907976870 | 32.338179265 |
| 1  | 29.725999309 | 42.559805774 | 31.699605203 |
| 1  | 30.552343165 | 41.055768248 | 31.875291854 |
| 7  | 31.916709017 | 41.695980061 | 33.842421720 |
| 1  | 32.430218233 | 42.029592655 | 34.658211871 |
| 1  | 32.279191268 | 40.861619598 | 33.368301082 |
| 26 | 33.003121451 | 37.241978544 | 33.567939439 |
| 6  | 34.423500864 | 39.507940019 | 34.636705557 |
| 8  | 34.842948104 | 40.643046835 | 34.858740695 |
| 8  | 33.588754372 | 39.182148252 | 33.716743435 |
| 6  | 34.896635263 | 38.293566230 | 35.476329905 |
| 8  | 34.648565922 | 37.177527639 | 35.004553062 |
| 6  | 35.701484214 | 38.496105832 | 36.721215911 |
| 6  | 35.740506099 | 37.258464055 | 37.608060163 |
| 6  | 36.539382798 | 37.379264050 | 38.915135863 |
| 8  | 36.092277421 | 36.720979062 | 39.889491046 |
| 8  | 37.588481510 | 38.075768267 | 38.916505951 |
| 1  | 36.189095458 | 36.423032998 | 37.041562006 |
| 1  | 34.713751399 | 36.953582420 | 37.856543384 |
| 1  | 35.292286735 | 39.370973294 | 37.250396039 |
| 1  | 36.722558090 | 38.800370495 | 36.420840696 |
| 8  | 32.031130537 | 37.584369268 | 35.419284846 |
| 8  | 32.534582623 | 38.313925584 | 36.322990478 |
| 8  | 36.795645506 | 38.982803203 | 29.772603356 |
| 6  | 35.912511158 | 38.759292576 | 28.964223338 |
| 7  | 34.640022689 | 39.333122040 | 29.109937654 |

|   |              |              |              |
|---|--------------|--------------|--------------|
| 6 | 34.447267177 | 40.243994854 | 30.245143071 |
| 6 | 33.591872046 | 39.086001641 | 28.254181624 |
| 7 | 32.407566007 | 39.581178511 | 28.542662950 |
| 6 | 33.851540888 | 38.318165775 | 27.078945990 |
| 6 | 35.078119521 | 37.757642849 | 26.912848586 |
| 7 | 36.068076103 | 37.925796165 | 27.858907761 |
| 1 | 33.992064489 | 41.174739364 | 29.879567441 |
| 1 | 35.425631147 | 40.460556209 | 30.678704527 |
| 1 | 31.559792600 | 39.419431076 | 27.961262453 |
| 1 | 35.307809144 | 37.148058223 | 26.034767605 |
| 1 | 33.053906666 | 38.149983053 | 26.359554730 |
| 1 | 33.800936795 | 39.786772524 | 31.008804633 |
| 1 | 32.203305198 | 39.971276940 | 27.859187748 |
| 1 | 35.048324503 | 34.752780105 | 29.456951006 |
| 1 | 29.055490876 | 38.010764769 | 30.669806215 |
| 1 | 32.532002789 | 32.036640860 | 34.813438973 |
| 1 | 28.774296358 | 44.539172583 | 34.659676935 |
| 1 | 36.918719064 | 37.401704156 | 27.817596566 |

**TS1**

**QM/MM (BS1) = -3428.034641 a.u.**

**QM/MM (BS2+ZPE) = -3430.036944 a.u.**

|    |              |              |               |
|----|--------------|--------------|---------------|
| 6  | 35.013937301 | 35.291708826 | 30.389086490  |
| 7  | 35.821311354 | 34.961074065 | 31.451486395  |
| 1  | 36.566986610 | 34.249125197 | 31.443496178  |
| 6  | 35.439930897 | 35.683142888 | 32.513098323  |
| 1  | 35.907217083 | 35.630015858 | 33.492150948  |
| 7  | 34.408436389 | 36.465822303 | 32.196538047  |
| 6  | 34.130865702 | 36.229446403 | 30.868301088  |
| 1  | 33.312027273 | 36.725903776 | 30.359374146  |
| 6  | 29.286856536 | 38.299409357 | 31.745986700  |
| 1  | 28.864795452 | 37.554311503 | 32.435252539  |
| 1  | 28.793705579 | 39.266075742 | 31.927256674  |
| 6  | 30.783884823 | 38.474516649 | 33.4921346119 |
| 8  | 31.322851158 | 39.564971410 | 31.709691988  |
| 8  | 31.420603256 | 37.479176700 | 32.492244501  |
| 6  | 32.313355391 | 33.010437284 | 34.497713909  |
| 7  | 31.239760302 | 33.331526222 | 33.699250487  |
| 1  | 30.483435947 | 32.720246165 | 33.364188899  |
| 6  | 31.322143362 | 34.630829890 | 33.376528524  |
| 1  | 30.604441326 | 35.160755359 | 32.756570971  |
| 7  | 32.397888175 | 35.174652056 | 33.932182897  |
| 6  | 33.031959251 | 34.173903270 | 34.632238529  |
| 1  | 33.966583890 | 34.353394694 | 35.155888082  |
| 6  | 29.279641882 | 44.341950387 | 33.723367401  |
| 1  | 29.552272757 | 45.291608295 | 33.230910534  |
| 1  | 28.579382221 | 43.804877871 | 33.069165671  |
| 7  | 30.455281876 | 43.524230945 | 33.978660112  |
| 1  | 31.094326074 | 43.812747615 | 34.721415706  |
| 6  | 30.780952530 | 42.377264161 | 33.340532220  |
| 7  | 30.058896233 | 41.907197344 | 32.320268552  |
| 1  | 29.594725578 | 42.553118376 | 31.688964867  |
| 1  | 30.425255464 | 41.043094257 | 31.869591752  |
| 7  | 31.827960325 | 41.678315341 | 33.784752089  |
| 1  | 32.354035156 | 41.998860099 | 34.596489388  |
| 1  | 32.138947311 | 40.837548341 | 33.287376551  |
| 26 | 33.015240033 | 37.171407852 | 33.624981957  |
| 6  | 34.388602460 | 39.598071521 | 34.540070356  |
| 8  | 34.916162157 | 40.640253722 | 34.865915703  |
| 8  | 33.705230216 | 39.229342777 | 33.571321135  |
| 6  | 34.482086273 | 38.177501456 | 35.690982729  |

|   |              |              |              |    |              |              |              |
|---|--------------|--------------|--------------|----|--------------|--------------|--------------|
| 8 | 34.614586086 | 37.157945276 | 34.912616326 | 1  | 28.631088860 | 43.762296888 | 33.055310176 |
| 6 | 35.482152235 | 38.446004838 | 36.805814150 | 7  | 30.489286081 | 43.495438591 | 34.001925278 |
| 6 | 35.639762520 | 37.194574364 | 37.672614781 | 1  | 31.092770357 | 43.778379019 | 34.774902439 |
| 6 | 36.474596162 | 37.336328111 | 38.955706168 | 6  | 30.799696692 | 42.299142438 | 33.437738779 |
| 8 | 36.047995059 | 36.690328518 | 39.948982290 | 7  | 30.147186325 | 41.829097852 | 32.374199789 |
| 8 | 37.522775301 | 38.032489464 | 38.927265505 | 1  | 29.794955232 | 42.481927340 | 31.675807748 |
| 1 | 36.119311145 | 36.407229321 | 37.064550423 | 1  | 30.534468409 | 40.939083379 | 31.968312546 |
| 1 | 34.647086305 | 36.819394357 | 37.958971948 | 7  | 31.755533105 | 41.571094743 | 34.013089362 |
| 1 | 35.118966988 | 39.299304549 | 37.396917329 | 1  | 32.252177516 | 41.943199744 | 34.821361545 |
| 1 | 36.442613070 | 38.742150742 | 36.360825657 | 1  | 32.094526321 | 40.678665539 | 33.633252453 |
| 8 | 32.228306272 | 37.778830244 | 35.356762776 | 26 | 33.098314188 | 37.208230783 | 33.439869681 |
| 8 | 33.157925143 | 38.368328423 | 36.178579182 | 6  | 35.383597217 | 41.013078276 | 33.823025161 |
| 8 | 36.789627893 | 38.999192706 | 29.767995387 | 8  | 34.811322402 | 41.886446669 | 34.056064981 |
| 6 | 35.905812684 | 38.765420375 | 28.963844478 | 8  | 35.976193369 | 40.161844489 | 33.307557905 |
| 7 | 34.630656146 | 39.336279783 | 29.107770017 | 6  | 34.828310098 | 38.111683564 | 35.655628264 |
| 6 | 34.435042378 | 40.252023918 | 30.237988103 | 8  | 34.723985396 | 37.056969748 | 35.034159254 |
| 6 | 33.580793477 | 39.076277813 | 28.258850152 | 6  | 35.757558153 | 38.326483791 | 36.827796972 |
| 7 | 32.396189839 | 39.574347568 | 28.544204031 | 6  | 35.755343271 | 37.107009489 | 37.747488547 |
| 6 | 33.837390202 | 38.293602928 | 27.093360455 | 6  | 36.542970673 | 37.260313551 | 39.054453056 |
| 6 | 35.067042794 | 37.739682648 | 26.926277131 | 8  | 36.065790915 | 36.665448477 | 40.054904249 |
| 7 | 36.061290765 | 37.923778407 | 27.864469827 | 8  | 37.606871033 | 37.933422048 | 39.034308723 |
| 1 | 34.002058345 | 41.190889034 | 29.865558769 | 1  | 36.192003133 | 36.253194968 | 37.200556776 |
| 1 | 35.410611398 | 40.451591142 | 30.686408231 | 1  | 34.723574680 | 36.825011346 | 38.002584842 |
| 1 | 31.541958009 | 39.396946864 | 27.977158064 | 1  | 35.455951437 | 39.239221468 | 37.361884658 |
| 1 | 35.295333304 | 37.123645044 | 26.052249748 | 1  | 36.774400955 | 38.504803971 | 36.437843013 |
| 1 | 33.037772570 | 38.114549197 | 26.379001570 | 8  | 33.206890348 | 39.023009826 | 34.244508125 |
| 1 | 33.771995176 | 39.803641329 | 30.992709035 | 8  | 34.113367562 | 39.176240956 | 35.386024918 |
| 1 | 32.203975909 | 40.000942802 | 29.445617987 | 8  | 36.763502645 | 38.948994751 | 29.769611409 |
| 1 | 35.031337802 | 34.750672736 | 29.443018578 | 6  | 35.880169564 | 38.719837189 | 28.961985791 |
| 1 | 29.046381116 | 37.985285387 | 30.730326805 | 7  | 34.601527208 | 39.273496760 | 29.120126649 |
| 1 | 32.528769584 | 31.990936784 | 34.817530704 | 6  | 34.392410981 | 40.147728040 | 30.278880380 |
| 1 | 28.750875687 | 44.561366171 | 34.650907346 | 6  | 33.560347243 | 39.049498777 | 28.250075314 |
| 1 | 36.913661151 | 37.402374591 | 27.824780094 | 7  | 32.377708975 | 39.546564545 | 28.540202387 |

### IMI

QM/MM (BS1) = -3428.111730 a.u.

QM/MM (BS2+ZPE) = -3430.110558 a.u.

|   |              |              |              |
|---|--------------|--------------|--------------|
| 6 | 35.074123884 | 35.248243911 | 30.278106189 |
| 7 | 35.861421904 | 34.895308880 | 31.347486703 |
| 1 | 36.581490559 | 34.159776222 | 31.355168002 |
| 6 | 35.494730900 | 35.637813830 | 32.402361845 |
| 1 | 35.949049339 | 35.561167834 | 33.386342058 |
| 7 | 34.501776376 | 36.460033934 | 32.075352298 |
| 6 | 34.225973956 | 36.222758328 | 30.747876264 |
| 1 | 33.416920512 | 36.731942133 | 30.233352298 |
| 6 | 29.266980348 | 38.378906343 | 31.650593388 |
| 1 | 28.782893853 | 37.695479461 | 32.363727307 |
| 1 | 28.828295213 | 39.380743711 | 31.768201000 |
| 6 | 30.769137183 | 38.443238580 | 31.923396415 |
| 8 | 31.379257093 | 39.526598561 | 31.710818009 |
| 8 | 31.325385377 | 37.403192001 | 32.386056307 |
| 6 | 32.324683599 | 33.084907763 | 34.528435024 |
| 7 | 31.247535218 | 33.409216094 | 33.736735874 |
| 1 | 30.509663098 | 32.790673714 | 33.376402712 |
| 6 | 31.304977064 | 34.722768225 | 33.458522898 |
| 1 | 30.589948982 | 35.256462293 | 32.838192984 |
| 7 | 32.363994007 | 35.278208980 | 34.036022465 |
| 6 | 33.016154732 | 34.262252359 | 34.700961005 |
| 1 | 33.950377800 | 34.443949924 | 35.224920392 |
| 6 | 29.316842465 | 44.308844190 | 33.717429360 |
| 1 | 29.594050152 | 45.254447267 | 33.219276360 |

|    |              |              |              |
|----|--------------|--------------|--------------|
| 1  | 28.631088860 | 43.762296888 | 33.055310176 |
| 7  | 30.489286081 | 43.495438591 | 34.001925278 |
| 1  | 31.092770357 | 43.778379019 | 34.774902439 |
| 6  | 30.799696692 | 42.299142438 | 33.437738779 |
| 7  | 30.147186325 | 41.829097852 | 32.374199789 |
| 1  | 29.794955232 | 42.481927340 | 31.675807748 |
| 1  | 30.534468409 | 40.939083379 | 31.968312546 |
| 7  | 31.755533105 | 41.571094743 | 34.013089362 |
| 1  | 32.252177516 | 41.943199744 | 34.821361545 |
| 1  | 32.094526321 | 40.678665539 | 33.633252453 |
| 26 | 33.098314188 | 37.208230783 | 33.439869681 |
| 6  | 35.383597217 | 41.013078276 | 33.823025161 |
| 8  | 34.811322402 | 41.886446669 | 34.056064981 |
| 8  | 35.976193369 | 40.161844489 | 33.307557905 |
| 6  | 34.828310098 | 38.111683564 | 35.655628264 |
| 8  | 34.723985396 | 37.056969748 | 35.034159254 |
| 6  | 35.757558153 | 38.326483791 | 36.827796972 |
| 6  | 35.755343271 | 37.107009489 | 37.747488547 |
| 6  | 36.542970673 | 37.260313551 | 39.054453056 |
| 8  | 36.065790915 | 36.665448477 | 40.054904249 |
| 8  | 37.606871033 | 37.933422048 | 39.034308723 |
| 1  | 36.192003133 | 36.253194968 | 37.200556776 |
| 1  | 34.723574680 | 36.825011346 | 38.002584842 |
| 1  | 35.455951437 | 39.239221468 | 37.361884658 |
| 1  | 36.774400955 | 38.504803971 | 36.437843013 |
| 8  | 33.206890348 | 39.023009826 | 34.244508125 |
| 8  | 34.113367562 | 39.176240956 | 35.386024918 |
| 8  | 36.763502645 | 38.948994751 | 29.769611409 |
| 6  | 35.880169564 | 38.719837189 | 28.961985791 |
| 7  | 34.601527208 | 39.273496760 | 29.120126649 |
| 6  | 34.392410981 | 40.147728040 | 30.278880380 |
| 6  | 33.560347243 | 39.049498777 | 28.250075314 |
| 7  | 32.377708975 | 39.546564545 | 28.540202387 |
| 6  | 33.829630013 | 38.304869048 | 27.061633803 |
| 6  | 35.057273663 | 37.746129836 | 26.895057584 |
| 7  | 36.044616845 | 37.903607271 | 27.846397366 |
| 1  | 34.042825848 | 41.129639291 | 29.928262627 |
| 1  | 35.347810224 | 40.252120032 | 30.796668073 |
| 1  | 31.533975767 | 39.397869993 | 27.948808843 |
| 1  | 35.291626354 | 37.148626084 | 26.010069114 |
| 1  | 33.036730212 | 38.147899180 | 26.334371385 |
| 1  | 33.647027339 | 39.714400105 | 30.964398245 |
| 1  | 32.164212985 | 39.899742177 | 29.470401273 |
| 1  | 35.062330470 | 34.690153819 | 29.341909793 |
| 1  | 29.026462890 | 38.020079019 | 30.649862843 |
| 1  | 32.534990608 | 32.061377446 | 34.838634923 |
| 1  | 28.776862058 | 44.539895418 | 34.635636201 |
| 1  | 36.895730519 | 37.380278383 | 27.805107178 |

### TS2

QM/MM (BS1) = -3428.102605 a.u.

QM/MM (BS2+ZPE) = -3430.111891 a.u.

|   |              |              |              |
|---|--------------|--------------|--------------|
| 6 | 35.059649214 | 35.270838441 | 30.297040389 |
| 7 | 35.845856489 | 34.931374050 | 31.372697782 |
| 1 | 36.569532206 | 34.197851361 | 31.385115085 |
| 6 | 35.475845729 | 35.682552559 | 32.418483188 |
| 1 | 35.922248591 | 35.618830458 | 33.406979674 |
| 7 | 34.478657744 | 36.497278588 | 32.077149860 |
| 6 | 34.204111760 | 36.245076987 | 30.751319504 |
| 1 | 33.392375208 | 36.745414679 | 30.232904440 |
| 6 | 29.308713133 | 38.333098273 | 31.627712865 |

|    |              |              |              |
|----|--------------|--------------|--------------|
| 1  | 28.851025752 | 37.629613044 | 32.338530236 |
| 1  | 28.866964327 | 39.328801392 | 31.778663189 |
| 6  | 30.818607312 | 38.412507617 | 31.848997666 |
| 8  | 31.408104296 | 39.495026904 | 31.607371847 |
| 8  | 31.399986997 | 37.372927142 | 32.298483859 |
| 6  | 32.319605995 | 33.152177754 | 34.524319750 |
| 7  | 31.258742858 | 33.466339322 | 33.705740200 |
| 1  | 30.537870262 | 32.838124509 | 33.326765045 |
| 6  | 31.301583440 | 34.780450741 | 33.436236217 |
| 1  | 30.600364217 | 35.304955307 | 32.793858726 |
| 7  | 32.335321792 | 35.349784775 | 34.047787351 |
| 6  | 32.985479115 | 34.339592503 | 34.726182524 |
| 1  | 33.898471682 | 34.539396910 | 35.279342769 |
| 6  | 29.321522271 | 44.261162923 | 33.724928532 |
| 1  | 29.602320235 | 45.199171142 | 33.214144167 |
| 1  | 28.636073874 | 43.706970756 | 33.068562833 |
| 7  | 30.491066339 | 43.447717567 | 34.025043323 |
| 1  | 31.088414424 | 43.735418711 | 34.801253911 |
| 6  | 30.818401447 | 42.253353255 | 33.463479267 |
| 7  | 30.180898424 | 41.785161556 | 32.388745892 |
| 1  | 29.825263732 | 42.441837396 | 31.695088781 |
| 1  | 30.575634340 | 40.909151706 | 31.967699600 |
| 7  | 31.770830873 | 41.532886580 | 34.051891681 |
| 1  | 32.255138580 | 41.921265410 | 34.860603404 |
| 1  | 32.121168205 | 40.623935594 | 33.708339238 |
| 26 | 33.112423525 | 37.264876869 | 33.455136751 |
| 6  | 35.373338804 | 41.008497432 | 33.811017579 |
| 8  | 34.818227975 | 41.889085126 | 34.340323635 |
| 8  | 35.951335252 | 40.157609383 | 33.278346760 |
| 6  | 34.803018479 | 38.144079796 | 35.653992255 |
| 8  | 34.636803249 | 37.067170809 | 35.046614356 |
| 6  | 35.801387486 | 38.283580248 | 36.793310951 |
| 6  | 35.779915125 | 37.062957129 | 37.710967410 |
| 6  | 36.560019737 | 37.216046525 | 39.023907659 |
| 8  | 36.074879492 | 36.624337691 | 40.023009255 |
| 8  | 37.624237921 | 37.888936271 | 39.011676235 |
| 1  | 36.208207626 | 36.199882032 | 37.171536834 |
| 1  | 34.743098733 | 36.795292074 | 37.962256710 |
| 1  | 35.570768654 | 39.204864334 | 37.347080993 |
| 1  | 36.805601474 | 38.419961571 | 36.356297180 |
| 8  | 33.058457601 | 38.965817555 | 34.075505761 |
| 8  | 34.150992758 | 39.222331691 | 35.406155191 |
| 8  | 36.782594000 | 38.952908281 | 29.761261559 |
| 6  | 35.898264299 | 38.726473591 | 28.953953452 |
| 7  | 34.621604791 | 39.283426798 | 29.111718441 |
| 6  | 34.418394711 | 40.170023691 | 30.262715931 |
| 6  | 33.576949999 | 39.053689189 | 28.246693797 |
| 7  | 32.393251847 | 39.542597711 | 28.544470540 |
| 6  | 33.844783141 | 38.311404964 | 27.056143837 |
| 6  | 35.072078804 | 37.752840465 | 26.887621855 |
| 7  | 36.059787044 | 37.908380264 | 27.839163946 |
| 1  | 34.052998794 | 41.142405846 | 29.902678998 |
| 1  | 35.378783577 | 40.291891713 | 30.766799383 |
| 1  | 31.549911008 | 39.399800114 | 27.950994133 |
| 1  | 35.305981652 | 37.155758271 | 26.002246419 |
| 1  | 33.050098664 | 38.153158720 | 26.331073669 |
| 1  | 33.686873650 | 39.738600857 | 30.962552652 |
| 1  | 32.178287375 | 39.882387021 | 29.480181591 |
| 1  | 35.060429406 | 34.711335213 | 29.361613824 |
| 1  | 29.047531183 | 37.994795777 | 30.625015140 |
| 1  | 32.528679211 | 32.129151754 | 34.837007306 |
| 1  | 28.779197142 | 44.507337957 | 34.637807839 |

|   |              |              |              |
|---|--------------|--------------|--------------|
| 1 | 36.910053876 | 37.383694767 | 27.797643557 |
|---|--------------|--------------|--------------|

**IM2**

**QM/MM (BS1) = -3428.108480 a.u.**

**QM/MM (BS2+ZPE) = -3430.118173 a.u.**

|    |              |              |              |
|----|--------------|--------------|--------------|
| 6  | 35.050210126 | 35.287806377 | 30.322082924 |
| 7  | 35.835804936 | 34.957775354 | 31.402031400 |
| 1  | 36.563620254 | 34.227519196 | 31.417041406 |
| 6  | 35.462043669 | 35.712256236 | 32.443128507 |
| 1  | 35.906202381 | 35.660818440 | 33.433394514 |
| 7  | 34.459323560 | 36.519323869 | 32.093086737 |
| 6  | 34.187447382 | 36.258916417 | 30.767089611 |
| 1  | 33.377912534 | 36.755040180 | 30.242042934 |
| 6  | 29.325314382 | 38.297840844 | 31.605171195 |
| 1  | 28.883859533 | 37.586027678 | 32.317578686 |
| 1  | 28.882788103 | 39.290851980 | 31.772220456 |
| 6  | 30.838578732 | 38.391899947 | 31.787831518 |
| 8  | 31.416451130 | 39.456769331 | 31.490080239 |
| 8  | 31.437384816 | 37.362142505 | 32.268060903 |
| 6  | 32.332957360 | 33.197704085 | 30.242042934 |
| 7  | 31.278768698 | 33.504658359 | 33.697134180 |
| 1  | 30.565754633 | 32.871229562 | 33.311040188 |
| 6  | 31.317175589 | 34.815329644 | 33.420873498 |
| 1  | 30.619136007 | 35.331051631 | 32.769075937 |
| 7  | 32.343310490 | 35.393161651 | 34.040551635 |
| 6  | 32.991725841 | 34.388894233 | 34.732480400 |
| 1  | 33.895926212 | 34.599412838 | 35.295207852 |
| 6  | 29.312098153 | 44.231420304 | 33.732243439 |
| 1  | 29.589503631 | 45.164193331 | 33.209822725 |
| 1  | 28.625741053 | 43.668736991 | 33.083934506 |
| 7  | 30.483624964 | 43.424411431 | 34.040939987 |
| 1  | 31.076605219 | 43.719869319 | 34.817531726 |
| 6  | 30.831290982 | 42.234061564 | 33.481127958 |
| 7  | 30.198917317 | 41.762312344 | 32.400209872 |
| 1  | 29.847478222 | 42.421124710 | 31.705513303 |
| 1  | 30.602765051 | 40.904343099 | 31.966776033 |
| 7  | 31.788600513 | 41.526902733 | 34.069138351 |
| 1  | 32.259105060 | 41.923772218 | 34.882523391 |
| 1  | 32.157669677 | 40.606190481 | 33.742916283 |
| 26 | 33.107051228 | 37.326596716 | 33.453007850 |
| 6  | 35.369850197 | 41.015625550 | 33.795874352 |
| 8  | 34.824273052 | 41.904675206 | 34.321024769 |
| 8  | 35.946771993 | 40.168201744 | 33.255953577 |
| 6  | 34.784257134 | 38.218331333 | 35.663452033 |
| 8  | 34.510619134 | 37.147974603 | 35.023040356 |
| 6  | 35.850444350 | 38.213514815 | 36.757318357 |
| 6  | 35.795948121 | 36.995033795 | 37.674321865 |
| 6  | 36.569434922 | 37.149910354 | 38.993259798 |
| 8  | 36.074399628 | 36.573281602 | 39.997064515 |
| 8  | 37.637710171 | 37.816189740 | 38.983796363 |
| 1  | 36.209357914 | 36.115275808 | 37.149798714 |
| 1  | 34.753637552 | 36.752368285 | 37.926940870 |
| 1  | 35.717642668 | 39.138898400 | 37.335653431 |
| 1  | 36.838843446 | 38.291210581 | 36.272633670 |
| 8  | 32.970574775 | 39.056983264 | 33.801118303 |
| 8  | 34.230083298 | 39.323474239 | 35.470004617 |
| 8  | 36.793116563 | 38.953220575 | 29.756011517 |
| 6  | 35.910507978 | 38.730016755 | 28.945951472 |
| 7  | 34.634559569 | 39.288592557 | 29.100827761 |
| 6  | 34.433091778 | 40.180947449 | 30.248810412 |
| 6  | 33.590685937 | 39.056172406 | 28.234989809 |
| 7  | 32.405512212 | 39.540281306 | 28.532544515 |

|   |              |              |              |
|---|--------------|--------------|--------------|
| 6 | 33.860613759 | 38.314869578 | 27.044065181 |
| 6 | 35.087991953 | 37.756608853 | 26.877223448 |
| 7 | 36.073561380 | 37.911802205 | 27.831129819 |
| 1 | 34.040141501 | 41.141173419 | 29.886028049 |
| 1 | 35.399300806 | 40.328923114 | 30.734301010 |
| 1 | 31.563853162 | 39.400692899 | 27.935989191 |
| 1 | 35.323581823 | 37.159077313 | 25.992631554 |
| 1 | 33.066396884 | 38.155552575 | 26.318707495 |
| 1 | 33.726196822 | 39.741182221 | 30.967617937 |
| 1 | 32.185941389 | 39.871295714 | 29.470893646 |
| 1 | 35.060760084 | 34.729899830 | 29.385762304 |
| 1 | 29.054713785 | 37.970896963 | 30.601203894 |
| 1 | 32.534405587 | 32.174040426 | 34.842801363 |
| 1 | 28.772992708 | 44.487962243 | 34.644174836 |
| 1 | 36.923783592 | 37.386964685 | 27.790629587 |

**IM3**

**QM/MM (BS1) = -3428.112549 a.u.**

**QM/MM (BS2+ZPE) = -3430.125638 a.u.**

|    |              |              |              |
|----|--------------|--------------|--------------|
| 6  | 35.016539773 | 35.289167431 | 30.603818373 |
| 7  | 35.774435605 | 34.892424091 | 31.679722823 |
| 1  | 36.514053549 | 34.175014198 | 31.658772479 |
| 6  | 35.342076800 | 35.551267023 | 32.764652862 |
| 1  | 35.752563424 | 35.420350746 | 33.760868441 |
| 7  | 34.330919579 | 36.360904076 | 32.449485815 |
| 6  | 34.116187119 | 36.204549079 | 31.096580713 |
| 1  | 33.311223130 | 36.724917310 | 30.589214489 |
| 6  | 29.473444762 | 38.308792908 | 31.697549789 |
| 1  | 29.058816136 | 37.546217948 | 32.374052519 |
| 1  | 28.981047359 | 39.266089326 | 31.920921723 |
| 6  | 30.973883713 | 38.472663814 | 31.957541678 |
| 8  | 31.466408267 | 39.626875977 | 31.894499983 |
| 8  | 31.660093633 | 37.442599899 | 32.266271766 |
| 6  | 32.233690762 | 33.001335097 | 34.503824620 |
| 7  | 31.198097378 | 33.318779024 | 33.655405061 |
| 1  | 30.479612324 | 32.700449702 | 33.257780848 |
| 6  | 31.257919035 | 34.634366811 | 33.384881772 |
| 1  | 30.566993421 | 35.161980960 | 32.733626163 |
| 7  | 32.279342433 | 35.184726760 | 34.022905103 |
| 6  | 32.904300759 | 34.180626959 | 34.722622929 |
| 1  | 33.794297393 | 34.379582819 | 35.309786950 |
| 6  | 29.341735656 | 44.399789185 | 33.713971944 |
| 1  | 29.633824681 | 45.362644583 | 33.260711738 |
| 1  | 28.660481878 | 43.888472594 | 33.021196833 |
| 7  | 30.506937148 | 43.569097699 | 33.975295449 |
| 1  | 31.136321374 | 43.840983053 | 34.731752713 |
| 6  | 30.787237992 | 42.385539546 | 33.382369783 |
| 7  | 30.058185448 | 41.912145432 | 32.365511984 |
| 1  | 29.667976838 | 42.559299923 | 31.684666767 |
| 1  | 30.437624628 | 41.033523224 | 31.953539812 |
| 7  | 31.791548612 | 41.649571978 | 33.857252954 |
| 1  | 32.356021719 | 41.972329602 | 34.642474028 |
| 1  | 32.029506842 | 40.776166632 | 33.373679576 |
| 26 | 32.950872410 | 37.168676779 | 33.807342554 |
| 6  | 35.597482300 | 41.118134560 | 33.806080890 |
| 8  | 34.870261857 | 41.740567329 | 34.478656987 |
| 8  | 36.329962108 | 40.536932536 | 33.124692050 |
| 6  | 34.812448978 | 37.885503238 | 35.369058580 |
| 8  | 34.383887036 | 36.691900010 | 35.315853549 |
| 6  | 35.759894492 | 38.282150876 | 36.495820662 |

|   |              |              |              |
|---|--------------|--------------|--------------|
| 6 | 35.786365287 | 37.215272238 | 37.589222659 |
| 6 | 36.575082196 | 37.456970443 | 38.882193865 |
| 8 | 36.134214327 | 36.832544327 | 39.885290431 |
| 8 | 37.605667102 | 38.179949917 | 38.870281583 |
| 1 | 36.196252268 | 36.284572104 | 37.158772041 |
| 1 | 34.755418800 | 36.972024697 | 37.880075351 |
| 1 | 35.417791153 | 39.254867895 | 36.884853530 |
| 1 | 36.765772948 | 38.462220406 | 36.078390598 |
| 8 | 31.892409685 | 37.811356907 | 34.844651583 |
| 8 | 34.398662908 | 38.712689878 | 34.507225875 |
| 8 | 36.820796200 | 38.975234709 | 29.731106001 |
| 6 | 35.938920987 | 38.719759712 | 28.932074555 |
| 7 | 34.658797252 | 39.280776339 | 29.071001046 |
| 6 | 34.446988179 | 40.173388766 | 30.214968977 |
| 6 | 33.627091946 | 39.050463039 | 28.193334511 |
| 7 | 32.455414267 | 39.597084287 | 28.438190301 |
| 6 | 33.887835351 | 38.247993861 | 27.042921465 |
| 6 | 35.111149416 | 37.674682589 | 26.899943419 |
| 7 | 36.097952445 | 37.862828776 | 27.845873163 |
| 1 | 34.161563978 | 41.171598465 | 29.851609731 |
| 1 | 35.385469716 | 40.236548013 | 30.770279179 |
| 1 | 31.603877515 | 39.428436969 | 27.864417423 |
| 1 | 35.341954984 | 37.043430398 | 26.037535493 |
| 1 | 33.097532763 | 38.076766142 | 26.316926719 |
| 1 | 33.658942140 | 39.774061522 | 30.872386707 |
| 1 | 32.269988357 | 40.075933462 | 29.312625828 |
| 1 | 35.079698380 | 34.801521944 | 29.631049030 |
| 1 | 29.201787658 | 38.019668134 | 30.682327348 |
| 1 | 32.467897743 | 31.983312293 | 34.815022277 |
| 1 | 28.786965454 | 44.593449584 | 34.632009516 |
| 1 | 36.952888335 | 37.345171531 | 27.812886751 |

**Ferryl flip mechanism reaction states coordinate  
AlkBH2-dsDNA**

**IM3'**

**QM/MM (BS1) = -3580.810509 a.u.**

**QM/MM (BS2+ZPE) = -3582.962240 a.u.**

|   |              |              |              |
|---|--------------|--------------|--------------|
| 6 | 35.039985247 | 35.175720984 | 30.678143212 |
| 7 | 35.773272511 | 34.730309810 | 31.750960056 |
| 1 | 36.511646835 | 34.012721452 | 31.714822483 |
| 6 | 35.321051054 | 35.344521224 | 32.853741588 |
| 1 | 35.710936172 | 35.169537918 | 33.851748622 |
| 7 | 34.322702107 | 36.173499864 | 32.551455762 |
| 6 | 34.134991343 | 36.076058747 | 31.189571693 |
| 1 | 33.343908990 | 36.623591753 | 30.687663138 |
| 6 | 29.537182394 | 38.250299222 | 31.749361845 |
| 1 | 29.076941584 | 37.499445961 | 32.409344736 |
| 1 | 29.082857823 | 39.224801690 | 31.975845723 |
| 6 | 31.039112069 | 38.332391277 | 32.041515773 |
| 8 | 31.594182379 | 39.458774780 | 32.016864358 |
| 8 | 31.664072268 | 37.259459803 | 32.332532372 |
| 6 | 32.197092217 | 32.815714408 | 34.506143173 |
| 7 | 31.145030875 | 33.147117491 | 33.683303132 |
| 1 | 30.413110000 | 32.542307769 | 33.290828374 |
| 6 | 31.201793920 | 34.467886600 | 33.434224074 |
| 1 | 30.497065690 | 35.008370758 | 32.808754409 |
| 7 | 32.237977055 | 35.003360566 | 34.060425913 |
| 6 | 32.873767687 | 33.987101801 | 34.729164560 |
| 1 | 33.772469768 | 34.174713721 | 35.303007358 |
| 6 | 29.284807795 | 44.248030204 | 33.712370479 |

|    |              |              |              |    |              |              |              |
|----|--------------|--------------|--------------|----|--------------|--------------|--------------|
| 1  | 29.522638476 | 45.170557423 | 33.155054880 | 1  | 36.523593742 | 34.152206061 | 31.600465703 |
| 1  | 28.593848191 | 43.650655893 | 33.102673693 | 6  | 35.338743603 | 35.518817382 | 32.705136112 |
| 7  | 30.490180549 | 43.481404916 | 33.997393023 | 1  | 35.773431608 | 35.425375512 | 33.696186677 |
| 1  | 31.133905469 | 43.836965597 | 34.705338740 | 7  | 34.313054185 | 36.302897941 | 32.388442700 |
| 6  | 30.833655166 | 42.295346586 | 33.444991667 | 6  | 34.090165722 | 36.142208613 | 31.041095415 |
| 7  | 30.092025555 | 41.715307873 | 32.492971929 | 1  | 33.278694848 | 36.657594878 | 30.536008325 |
| 1  | 29.666838848 | 42.316038120 | 31.784460373 | 6  | 29.293842538 | 38.188134061 | 31.748126672 |
| 1  | 30.533510736 | 40.861756015 | 32.094660679 | 1  | 28.855163214 | 37.394267104 | 32.372716849 |
| 7  | 31.913475459 | 41.661387458 | 33.899067567 | 1  | 28.781327070 | 39.131099634 | 31.983900283 |
| 1  | 32.502868030 | 42.077763374 | 34.619736663 | 6  | 30.775188933 | 38.344735304 | 32.076766376 |
| 1  | 32.217248923 | 40.803467268 | 33.434358585 | 8  | 31.217694653 | 39.526162407 | 32.181610026 |
| 26 | 32.930468277 | 36.963911097 | 33.908454812 | 8  | 31.488032381 | 37.317333342 | 32.276424142 |
| 6  | 35.817930535 | 41.869189924 | 33.151483791 | 6  | 32.346082167 | 33.088437333 | 30.57820290  |
| 8  | 34.986484040 | 42.034603863 | 33.954728986 | 7  | 31.303585079 | 33.418899265 | 33.744473085 |
| 8  | 36.618140550 | 41.865168801 | 32.306544117 | 1  | 30.588131649 | 32.803145157 | 33.336460133 |
| 6  | 34.754883029 | 37.532057631 | 35.572583161 | 6  | 31.356784305 | 34.737205381 | 33.495186007 |
| 8  | 34.332377028 | 36.346993096 | 35.523030045 | 1  | 30.674817148 | 35.272109551 | 32.841967637 |
| 6  | 35.674142901 | 37.990161983 | 36.689156073 | 7  | 32.380820156 | 35.286836718 | 34.134110585 |
| 6  | 35.883701161 | 36.892016917 | 37.727740176 | 6  | 33.014612905 | 34.269414651 | 34.811483341 |
| 6  | 36.586184282 | 37.265080110 | 39.037218288 | 1  | 33.914903852 | 34.450205196 | 35.391324702 |
| 8  | 36.068715079 | 36.782430903 | 40.081724011 | 6  | 29.489875800 | 44.530378996 | 33.809017083 |
| 8  | 37.630268118 | 37.966261809 | 38.998743974 | 1  | 29.919715796 | 45.527413207 | 33.625938614 |
| 1  | 36.471595944 | 36.072600516 | 37.274962812 | 1  | 28.935269367 | 44.240607900 | 32.907803230 |
| 1  | 34.908752549 | 36.465757029 | 37.990870017 | 7  | 30.566417586 | 43.590884471 | 34.085487885 |
| 1  | 35.203996633 | 38.883393039 | 37.136487382 | 1  | 31.200809353 | 43.821075415 | 34.853274871 |
| 1  | 36.610594477 | 38.361619329 | 36.242854358 | 6  | 30.653609285 | 42.316973309 | 33.638603255 |
| 8  | 31.846932134 | 37.583158939 | 34.931887601 | 7  | 29.881449385 | 41.846521034 | 32.656850122 |
| 8  | 34.353340411 | 38.344997729 | 34.672540837 | 1  | 29.583118753 | 42.492605185 | 31.923581585 |
| 8  | 35.752264005 | 38.851368692 | 29.225891290 | 1  | 30.207386809 | 40.929965703 | 32.283774674 |
| 6  | 35.224917725 | 38.444464493 | 28.197385982 | 7  | 31.518732605 | 41.494819018 | 34.237460484 |
| 7  | 33.912700364 | 38.814845815 | 27.852487360 | 1  | 32.147994343 | 41.845956974 | 34.957927488 |
| 6  | 33.211567497 | 39.759268356 | 28.737269524 | 1  | 31.643314360 | 40.550385687 | 33.870339884 |
| 6  | 33.236059810 | 38.312982955 | 26.759350919 | 26 | 33.051720867 | 37.270655119 | 33.732996204 |
| 7  | 31.984572502 | 38.644525535 | 26.536163387 | 6  | 36.877131400 | 41.459820415 | 32.854971295 |
| 6  | 33.955430458 | 37.456551668 | 25.876480175 | 8  | 35.997017261 | 41.841666283 | 33.510159226 |
| 6  | 35.238641757 | 37.142571740 | 26.154389313 | 8  | 37.829960583 | 41.115250491 | 32.277976574 |
| 7  | 35.861903387 | 37.589016958 | 27.301331850 | 6  | 35.033298050 | 38.489423080 | 35.527482956 |
| 1  | 32.750547965 | 40.547501766 | 28.131676397 | 8  | 34.629121045 | 37.384663918 | 34.997859166 |
| 1  | 33.928206966 | 40.204631920 | 29.428448863 | 6  | 35.919659221 | 38.409597565 | 36.762784536 |
| 1  | 31.483589711 | 38.283889779 | 25.717145884 | 6  | 35.773574168 | 37.164450685 | 37.625874000 |
| 1  | 35.803273781 | 36.516595875 | 25.468390757 | 6  | 36.567046084 | 37.214835137 | 38.941963552 |
| 1  | 33.475978053 | 37.043538340 | 24.996437317 | 8  | 36.067822193 | 36.605490012 | 39.925479745 |
| 1  | 32.420157870 | 39.241680296 | 29.296461860 | 8  | 37.661036029 | 37.838741591 | 38.949644332 |
| 1  | 31.397181903 | 39.219567889 | 27.168347268 | 1  | 36.120907641 | 36.278520925 | 37.063557105 |
| 8  | 36.635429961 | 39.829297557 | 34.269291538 | 1  | 34.715422430 | 36.984402571 | 37.869605479 |
| 1  | 37.089331863 | 39.403757539 | 33.528585781 | 1  | 35.702888899 | 39.312208357 | 37.351602463 |
| 1  | 33.570942578 | 39.571619495 | 31.798870256 | 1  | 36.967221027 | 38.522424050 | 36.433659719 |
| 8  | 34.508032468 | 39.843419715 | 31.798865520 | 8  | 32.071445361 | 38.030331871 | 34.777142367 |
| 1  | 35.739658775 | 39.430923700 | 34.233097296 | 8  | 34.766087558 | 39.623607519 | 35.079783794 |
| 1  | 34.909517972 | 39.375865580 | 31.048106876 | 8  | 35.834728124 | 38.957944742 | 28.865848573 |
| 1  | 35.122270092 | 34.722361251 | 29.690336816 | 6  | 35.238868954 | 38.439265687 | 27.930090838 |
| 1  | 29.269618259 | 37.984145815 | 30.726796875 | 7  | 33.896170972 | 38.743158671 | 27.657840367 |
| 1  | 32.459455752 | 31.799692354 | 34.800985295 | 6  | 33.197965721 | 39.686563821 | 28.549558468 |
| 1  | 28.766739733 | 44.513030206 | 34.634025407 | 6  | 33.182865240 | 38.180985188 | 26.618428462 |
| 1  | 36.749251325 | 37.195796234 | 27.542088152 | 7  | 31.923346175 | 38.502353881 | 26.426406581 |
|    |              |              |              | 6  | 33.869832530 | 37.263557969 | 25.770044167 |
|    |              |              |              | 6  | 35.163009871 | 36.962194917 | 26.020876025 |
|    |              |              |              | 7  | 35.838787374 | 37.504977112 | 27.092865246 |
|    |              |              |              | 1  | 32.728448105 | 40.475096237 | 27.951096502 |
|    |              |              |              | 1  | 33.909166253 | 40.134434647 | 29.244339578 |
|    |              |              |              | 1  | 31.398930072 | 38.118948665 | 25.633146018 |
|    |              |              |              | 1  | 35.693633584 | 36.269985630 | 25.374303555 |

**IM4**

**QM/MM (BS1) = -3580.818612 a.u.**

**QM/MM (BS2+ZPE) = -3582.964722 a.u.**

|   |              |              |              |
|---|--------------|--------------|--------------|
| 6 | 35.004749736 | 35.239871729 | 30.548858204 |
| 7 | 35.774438193 | 34.859127132 | 31.621226528 |

|    |              |              |              |
|----|--------------|--------------|--------------|
| 1  | 36.523593742 | 34.152206061 | 31.600465703 |
| 6  | 35.338743603 | 35.518817382 | 32.705136112 |
| 1  | 35.773431608 | 35.425375512 | 33.696186677 |
| 7  | 34.313054185 | 36.302897941 | 32.388442700 |
| 6  | 34.090165722 | 36.142208613 | 31.041095415 |
| 1  | 33.278694848 | 36.657594878 | 30.536008325 |
| 6  | 29.293842538 | 38.188134061 | 31.748126672 |
| 1  | 28.855163214 | 37.394267104 | 32.372716849 |
| 1  | 28.781327070 | 39.131099634 | 31.983900283 |
| 6  | 30.775188933 | 38.344735304 | 32.076766376 |
| 8  | 31.217694653 | 39.526162407 | 32.181610026 |
| 8  | 31.488032381 | 37.317333342 | 32.276424142 |
| 6  | 32.346082167 | 33.088437333 | 30.57820290  |
| 7  | 31.303585079 | 33.418899265 | 33.744473085 |
| 1  | 30.588131649 | 32.803145157 | 33.336460133 |
| 6  | 31.356784305 | 34.737205381 | 33.495186007 |
| 1  | 30.674817148 | 35.272109551 | 32.841967637 |
| 7  | 32.380820156 | 35.286836718 | 34.134110585 |
| 6  | 33.014612905 | 34.269414651 | 34.811483341 |
| 1  | 33.914903852 | 34.450205196 | 35.391324702 |
| 6  | 29.489875800 | 44.530378996 | 33.809017083 |
| 1  | 29.919715796 | 45.527413207 | 33.625938614 |
| 1  | 28.935269367 | 44.240607900 | 32.907803230 |
| 7  | 30.566417586 | 43.590884471 | 34.085487885 |
| 1  | 31.200809353 | 43.821075415 | 34.853274871 |
| 6  | 30.653609285 | 42.316973309 | 33.638603255 |
| 7  | 29.881449385 | 41.846521034 | 32.656850122 |
| 1  | 29.583118753 | 42.492605185 | 31.923581585 |
| 1  | 30.207386809 | 40.929965703 | 32.283774674 |
| 7  | 31.518732605 | 41.494819018 | 34.237460484 |
| 1  | 32.147994343 | 41.845956974 | 34.957927488 |
| 1  | 31.643314360 | 40.550385687 | 33.870339884 |
| 26 | 33.051720867 | 37.270655119 | 33.732996204 |
| 6  | 36.877131400 | 41.459820415 | 32.854971295 |
| 8  | 35.997017261 | 41.841666283 | 33.510159226 |
| 8  | 37.829960583 | 41.115250491 | 32.277976574 |
| 6  | 35.033298050 | 38.489423080 | 35.527482956 |
| 8  | 34.629121045 | 37.384663918 | 34.997859166 |
| 6  | 35.919659221 | 38.409597565 | 36.762784536 |
| 6  | 35.773574168 | 37.164450685 | 37.625874000 |
| 6  | 36.567046084 | 37.214835137 | 38.941963552 |
| 8  | 36.067822193 | 36.605490012 | 39.925479745 |
| 8  | 37.661036029 | 37.838741591 | 38.949644332 |
| 1  | 36.120907641 | 36.278520925 | 37.063557105 |
| 1  | 34.715422430 | 36.984402571 | 37.869605479 |
| 1  | 35.702888899 | 39.312208357 | 37.351602463 |
| 1  | 36.967221027 | 38.522424050 | 36.433659719 |
| 8  | 32.071445361 | 38.030331871 | 34.777142367 |
| 8  | 34.766087558 | 39.623607519 | 35.079783794 |
| 8  | 35.834728124 | 38.957944742 | 28.865848573 |
| 6  | 35.238868954 | 38.439265687 | 27.930090838 |
| 7  | 33.896170972 | 38.743158671 | 27.657840367 |
| 6  | 33.197965721 | 39.686563821 | 28.549558468 |
| 6  | 33.182865240 | 38.180985188 | 26.618428462 |
| 7  | 31.923346175 | 38.502353881 | 26.426406581 |
| 6  | 33.869832530 | 37.263557969 | 25.770044167 |
| 6  | 35.163009871 | 36.962194917 | 26.020876025 |
| 7  | 35.838787374 | 37.504977112 | 27.092865246 |
| 1  | 32.728448105 | 40.475096237 | 27.951096502 |
| 1  | 33.909166253 | 40.134434647 | 29.244339578 |
| 1  | 31.398930072 | 38.118948665 | 25.633146018 |
| 1  | 35.693633584 | 36.269985630 | 25.374303555 |

|   |              |              |              |
|---|--------------|--------------|--------------|
| 1 | 33.349427648 | 36.773125289 | 24.954770573 |
| 1 | 32.410652846 | 39.156850944 | 29.103724753 |
| 1 | 31.352841014 | 39.097566407 | 27.056764906 |
| 8 | 33.721201590 | 39.065716954 | 32.835876146 |
| 1 | 32.854969676 | 39.463179430 | 32.549599334 |
| 1 | 34.821767250 | 39.909247561 | 31.604780979 |
| 8 | 35.290608005 | 40.579206347 | 31.069652656 |
| 1 | 34.084766802 | 39.496916649 | 33.686552572 |
| 1 | 35.557863619 | 40.082130440 | 30.277585235 |
| 1 | 35.074715435 | 34.750579178 | 29.577382566 |
| 1 | 29.080678898 | 37.933632735 | 30.709927429 |
| 1 | 32.553583489 | 32.058931848 | 34.869588987 |
| 1 | 28.792407354 | 44.597570970 | 34.643936436 |
| 1 | 36.726192839 | 37.127596590 | 27.357568834 |

**TS3**

**QM/MM (BS1) = -3580.806149 a.u.**

**QM/MM (BS2+ZPE) = -3582.951774 a.u.**

|    |              |              |              |
|----|--------------|--------------|--------------|
| 6  | 35.014830483 | 35.227739001 | 30.497666851 |
| 7  | 35.776543334 | 34.845958937 | 31.575616640 |
| 1  | 36.524686853 | 34.138045531 | 31.562784462 |
| 6  | 35.335436229 | 35.504458274 | 32.656432156 |
| 1  | 35.763414711 | 35.412564358 | 33.650345365 |
| 7  | 34.312129453 | 36.288771808 | 32.331173990 |
| 6  | 34.098094967 | 36.130830556 | 30.982842573 |
| 1  | 33.291110325 | 36.648343505 | 30.472982701 |
| 6  | 29.288144982 | 38.181379081 | 31.739214512 |
| 1  | 28.856835578 | 37.385627846 | 32.366071917 |
| 1  | 28.776102895 | 39.123794400 | 31.978756526 |
| 6  | 30.773168391 | 38.339735490 | 32.044920489 |
| 8  | 31.223330100 | 39.518389328 | 32.117591813 |
| 8  | 31.482527737 | 37.309907143 | 32.253996923 |
| 6  | 32.353845801 | 33.127122974 | 34.579032243 |
| 7  | 31.310498283 | 33.453602470 | 33.744861279 |
| 1  | 30.600807572 | 32.833710927 | 33.332844011 |
| 6  | 31.355222089 | 34.772789630 | 33.500389836 |
| 1  | 30.672410413 | 35.302749379 | 32.844154594 |
| 7  | 32.373296398 | 35.330833525 | 34.143548890 |
| 6  | 33.012213303 | 34.313285551 | 34.819016708 |
| 1  | 33.909743088 | 34.500096238 | 35.401497203 |
| 6  | 29.488716913 | 44.512114586 | 33.806475249 |
| 1  | 29.921896255 | 45.506990786 | 33.618687452 |
| 1  | 28.932772349 | 44.220189819 | 32.906718755 |
| 7  | 30.561424624 | 43.569422031 | 34.087636482 |
| 1  | 31.194406870 | 43.799296353 | 34.856663436 |
| 6  | 30.654147141 | 42.296532367 | 33.636954571 |
| 7  | 29.892269086 | 41.828265266 | 32.646535875 |
| 1  | 29.591701971 | 42.478671604 | 31.918133234 |
| 1  | 30.226835322 | 40.917724997 | 32.263810695 |
| 7  | 31.513888886 | 41.474108031 | 34.242732545 |
| 1  | 32.138811429 | 41.825719278 | 34.966508493 |
| 1  | 31.649027018 | 40.529227075 | 33.880319971 |
| 26 | 33.091392063 | 37.297106187 | 33.650557374 |
| 6  | 36.859998508 | 41.438651542 | 32.881413409 |
| 8  | 35.980007504 | 41.780884490 | 33.559814171 |
| 8  | 37.818292277 | 41.135839815 | 32.290589328 |
| 6  | 34.990078350 | 38.427115809 | 35.530641832 |
| 8  | 34.674706807 | 37.321480350 | 34.958575830 |
| 6  | 35.915014367 | 38.384008162 | 36.737076518 |
| 6  | 35.776959834 | 37.153270916 | 37.626127486 |
| 6  | 36.569837832 | 37.223814397 | 38.941942660 |

|   |              |              |              |
|---|--------------|--------------|--------------|
| 8 | 36.073699072 | 36.614551680 | 39.927028768 |
| 8 | 37.656757128 | 37.859168796 | 38.947906757 |
| 1 | 36.124484906 | 36.257922600 | 37.079218190 |
| 1 | 34.720298788 | 36.975030900 | 37.877722931 |
| 1 | 35.721960929 | 39.298647803 | 37.313993672 |
| 1 | 36.954051250 | 38.472150819 | 36.374646258 |
| 8 | 32.254083702 | 38.255964710 | 34.653758013 |
| 8 | 34.587565480 | 39.548572519 | 35.138338908 |
| 8 | 35.830176507 | 38.944202622 | 28.891150791 |
| 6 | 35.238878304 | 38.435498072 | 27.947315711 |
| 7 | 33.897421217 | 38.743346359 | 27.671463078 |
| 6 | 33.200040196 | 39.686552497 | 28.564436451 |
| 6 | 33.186148007 | 38.186121907 | 36.628071162 |
| 7 | 31.927096449 | 38.508230225 | 26.434086218 |
| 6 | 33.874665527 | 37.272954754 | 25.776136998 |
| 6 | 35.168204211 | 36.972616486 | 26.025894694 |
| 7 | 35.841848728 | 37.509381386 | 27.102370280 |
| 1 | 32.730164867 | 40.474684024 | 27.965674547 |
| 1 | 33.912591305 | 40.134511595 | 29.258252373 |
| 1 | 31.404378623 | 38.126187630 | 25.639083742 |
| 1 | 35.700721680 | 36.285492931 | 25.375063485 |
| 1 | 33.355553986 | 36.786472356 | 24.957682476 |
| 1 | 32.413030297 | 39.157885930 | 29.120028386 |
| 1 | 31.354609482 | 39.100021001 | 27.065895447 |
| 8 | 33.728877999 | 39.083385859 | 32.847812283 |
| 1 | 32.855934927 | 39.429913342 | 32.516926841 |
| 1 | 34.820990841 | 39.961005557 | 31.686488825 |
| 8 | 35.290412220 | 40.592295732 | 31.103027886 |
| 1 | 33.889540424 | 39.383211794 | 33.912739470 |
| 1 | 35.544457295 | 40.050159498 | 30.336926706 |
| 1 | 35.081988802 | 34.729270035 | 29.530668524 |
| 1 | 29.072528235 | 37.926884619 | 30.701520284 |
| 1 | 32.557988402 | 32.096931760 | 34.870749875 |
| 1 | 28.791573862 | 44.586554230 | 34.641051568 |
| 1 | 36.729431177 | 37.130523470 | 27.364356104 |

**IM5**

**QM/MM (BS1) = -3580.810798 a.u.**

**QM/MM (BS2+ZPE) = -3582.957150 a.u.**

|   |              |              |              |
|---|--------------|--------------|--------------|
| 6 | 35.013101238 | 35.240445516 | 30.454990744 |
| 7 | 35.774571461 | 34.852198455 | 31.530269515 |
| 1 | 36.519114801 | 34.140567701 | 31.516962306 |
| 6 | 35.338705581 | 35.513457187 | 32.612582884 |
| 1 | 35.768722703 | 35.408073670 | 33.604177010 |
| 7 | 34.322404371 | 36.307648646 | 32.292160873 |
| 6 | 34.105683834 | 36.152473381 | 30.944238442 |
| 1 | 33.299987623 | 36.676533365 | 30.437585305 |
| 6 | 29.214366175 | 38.202131646 | 31.711214828 |
| 1 | 28.765821388 | 37.420055356 | 32.343505048 |
| 1 | 28.701787464 | 39.150813407 | 31.923263740 |
| 6 | 30.693111769 | 38.349201677 | 32.053064633 |
| 8 | 31.145671852 | 39.521579526 | 32.171624758 |
| 8 | 31.388935358 | 37.308018113 | 32.245574966 |
| 6 | 32.377869352 | 33.140589820 | 34.560678858 |
| 7 | 31.338358946 | 33.464329253 | 33.720871404 |
| 1 | 30.620199701 | 32.845558872 | 33.323651524 |
| 6 | 31.399468033 | 34.777014788 | 33.449095325 |
| 1 | 30.723344665 | 35.308771257 | 32.786653560 |
| 7 | 32.426947854 | 35.332981857 | 34.078812013 |
| 6 | 33.053223212 | 34.322307801 | 34.775664624 |
| 1 | 33.954788106 | 34.508216659 | 35.351922122 |



|    |              |              |              |    |              |              |               |
|----|--------------|--------------|--------------|----|--------------|--------------|---------------|
| 6  | 29.472208281 | 44.516619028 | 33.804899502 | 7  | 35.781826201 | 34.826401832 | 31.491120247  |
| 1  | 29.899658782 | 45.512873602 | 33.611056192 | 1  | 36.527724801 | 34.116784121 | 31.477231101  |
| 1  | 28.907736518 | 44.220899017 | 32.911928299 | 6  | 35.345355387 | 35.479988689 | 32.576787080  |
| 7  | 30.550085387 | 43.577655130 | 34.074288711 | 1  | 35.773798534 | 35.372849860 | 33.568254902  |
| 1  | 31.192052507 | 43.808202528 | 34.834885802 | 7  | 34.332757782 | 36.278284817 | 32.256437038  |
| 6  | 30.634293358 | 42.303955586 | 33.621292401 | 6  | 34.118750374 | 36.135451517 | 30.907648280  |
| 7  | 29.856475553 | 41.838116424 | 32.643744375 | 1  | 33.316940086 | 36.667232212 | 30.402949035  |
| 1  | 29.562484100 | 42.485733987 | 31.910079839 | 6  | 29.183161000 | 38.199057729 | 31.701073776  |
| 1  | 30.176814350 | 40.914317233 | 32.272805099 | 1  | 28.726499687 | 37.421593806 | 32.333555949  |
| 7  | 31.502237197 | 41.479572824 | 34.213108102 | 1  | 28.674363637 | 39.151462771 | 31.905944007  |
| 1  | 32.128192133 | 41.833046366 | 34.934000992 | 6  | 30.662030136 | 38.339100122 | 32.043252782  |
| 1  | 31.648889570 | 40.545715656 | 33.820759346 | 8  | 31.117106546 | 39.510389935 | 32.171559267  |
| 26 | 33.052837389 | 37.314187928 | 33.608213711 | 8  | 31.350631741 | 37.292024524 | 32.2203049536 |
| 6  | 36.809234307 | 41.441700587 | 32.884758555 | 6  | 32.386494164 | 33.166107181 | 34.549234002  |
| 8  | 35.938033165 | 41.757657167 | 33.589360581 | 7  | 31.339190464 | 33.485096359 | 33.717408018  |
| 8  | 37.771243133 | 41.186094233 | 32.279028694 | 1  | 30.616919791 | 32.863146639 | 33.331067541  |
| 6  | 35.103434832 | 38.339571720 | 35.592817338 | 6  | 31.398963389 | 34.795918502 | 33.436950569  |
| 8  | 34.780011831 | 37.278021235 | 35.035153313 | 1  | 30.716374813 | 35.324009737 | 32.778609007  |
| 6  | 35.960640591 | 38.376710956 | 36.831729505 | 7  | 32.433885627 | 35.355919574 | 34.051881955  |
| 6  | 35.828992605 | 37.140350445 | 37.708280476 | 6  | 33.064444521 | 34.348775337 | 34.750527895  |
| 6  | 36.596926268 | 37.229451257 | 39.032989500 | 1  | 33.970142882 | 34.537734843 | 35.319684120  |
| 8  | 36.089483836 | 36.626946064 | 40.014191850 | 6  | 29.466511286 | 44.514537530 | 33.804326657  |
| 8  | 37.678371706 | 37.874399883 | 39.042212493 | 1  | 29.896186654 | 45.509092921 | 33.606292459  |
| 1  | 36.207100841 | 36.257284355 | 37.162449765 | 1  | 28.897708419 | 44.218838220 | 32.914028513  |
| 1  | 34.771018141 | 36.941364141 | 37.935611540 | 7  | 30.541740310 | 43.572010073 | 34.071373786  |
| 1  | 35.696178773 | 39.287289628 | 37.387544764 | 1  | 31.183148867 | 43.799249600 | 34.833370408  |
| 1  | 37.009988545 | 38.516034118 | 36.517964592 | 6  | 30.622634768 | 42.298587495 | 33.616971256  |
| 8  | 32.201763789 | 38.093726210 | 34.753136141 | 7  | 29.841887904 | 41.835134055 | 32.640304125  |
| 8  | 34.735790843 | 39.512808958 | 35.163612265 | 1  | 29.551707045 | 42.483903336 | 31.906303689  |
| 8  | 35.845180952 | 38.935650398 | 28.909336687 | 1  | 30.155800378 | 40.907846559 | 32.271332208  |
| 6  | 35.249356120 | 38.434474050 | 27.964726934 | 7  | 31.490425945 | 41.472172195 | 34.206155755  |
| 7  | 33.906066730 | 38.742272585 | 27.698843127 | 1  | 32.114614837 | 41.825765734 | 34.928735192  |
| 6  | 33.208582630 | 39.668575150 | 28.610391473 | 1  | 31.636362151 | 40.540015559 | 33.806630298  |
| 6  | 33.195079032 | 38.201629922 | 26.646689120 | 26 | 33.072695130 | 37.332239323 | 33.529297921  |
| 7  | 31.937752899 | 38.530356226 | 26.453754164 | 6  | 36.725724803 | 41.345700896 | 32.979124596  |
| 6  | 33.881781616 | 37.297013036 | 25.783614156 | 8  | 35.843271146 | 41.562476520 | 33.708508728  |
| 6  | 35.175277353 | 36.991927069 | 26.027698564 | 8  | 37.700374409 | 41.186964841 | 32.360439280  |
| 7  | 35.850242104 | 37.517127752 | 27.108833190 | 6  | 35.117985058 | 38.200871606 | 35.678190138  |
| 1  | 32.758852582 | 40.482402498 | 28.030588874 | 8  | 34.861293996 | 37.207770759 | 34.986967306  |
| 1  | 33.917421858 | 40.080228767 | 29.330447179 | 6  | 36.210644079 | 38.218041100 | 36.714165614  |
| 1  | 31.413821442 | 38.153109856 | 25.657205787 | 6  | 35.957708906 | 37.085502710 | 37.716275307  |
| 1  | 35.707729363 | 36.312476372 | 25.368325265 | 6  | 36.681520394 | 37.223790272 | 39.058986608  |
| 1  | 33.361314445 | 36.822792156 | 24.959008938 | 8  | 36.157468688 | 36.614075526 | 40.026361598  |
| 1  | 32.406452549 | 39.133337292 | 29.137193224 | 8  | 37.734780868 | 37.909808561 | 39.094997051  |
| 1  | 31.367266629 | 39.121832132 | 27.087960429 | 1  | 36.260753429 | 36.121503685 | 37.271629800  |
| 8  | 33.705142452 | 38.969085558 | 32.876142872 | 1  | 34.882236091 | 37.001550655 | 37.936741117  |
| 1  | 32.873474866 | 39.393022888 | 32.558821619 | 1  | 36.195982811 | 39.188252661 | 37.224441117  |
| 1  | 34.787168488 | 39.769018326 | 31.774568076 | 1  | 37.194672288 | 38.110575303 | 36.232272014  |
| 8  | 35.283004887 | 40.417335800 | 31.222257437 | 8  | 32.241971158 | 38.155656532 | 34.699040097  |
| 1  | 34.218171016 | 39.408571751 | 34.276055635 | 8  | 34.405296679 | 39.298465729 | 35.635990999  |
| 1  | 35.545206070 | 39.905144564 | 30.439066043 | 8  | 35.855314844 | 38.942478214 | 28.933647878  |
| 1  | 35.071795086 | 34.733194202 | 29.492016984 | 6  | 35.258066621 | 38.443945746 | 27.988415664  |
| 1  | 29.016439606 | 37.928179494 | 30.674951051 | 7  | 33.912917474 | 38.748027858 | 27.725658162  |
| 1  | 32.570191240 | 32.110785504 | 34.861648423 | 6  | 33.209064726 | 39.661202821 | 28.645586951  |
| 1  | 28.782296094 | 44.590366936 | 34.645524116 | 6  | 33.204962772 | 38.216669409 | 26.666686877  |
| 1  | 36.737704752 | 37.135536530 | 27.367233420 | 7  | 31.947535693 | 38.545345950 | 26.473760896  |
|    |              |              |              | 6  | 33.894360906 | 37.321787236 | 25.795694495  |
|    |              |              |              | 6  | 35.187611999 | 37.015948774 | 26.039358461  |
|    |              |              |              | 7  | 35.859837235 | 37.532270445 | 27.126333161  |
|    |              |              |              | 1  | 32.755707740 | 40.478460672 | 28.073696018  |
|    |              |              |              | 1  | 33.913275346 | 40.070149756 | 29.371135892  |
|    |              |              |              | 1  | 31.425216930 | 38.171366508 | 25.674632065  |

**TS4**

**QM/MM (BS1) = -3580.795662 a.u.**

**QM/MM (BS2+ZPE) = -3582.946226 a.u.**

|   |              |              |              |
|---|--------------|--------------|--------------|
| 6 | 35.023800038 | 35.223205281 | 30.415980315 |
|---|--------------|--------------|--------------|

|   |              |              |              |   |              |              |              |
|---|--------------|--------------|--------------|---|--------------|--------------|--------------|
| 1 | 35.722522978 | 36.344320941 | 25.373706654 | 6 | 36.652164043 | 37.033470065 | 39.053573389 |
| 1 | 33.376924364 | 36.856755726 | 24.964200638 | 8 | 36.164436666 | 36.456688740 | 40.060351425 |
| 1 | 32.410106471 | 39.115719478 | 29.166493604 | 8 | 37.685628525 | 37.750520505 | 39.039378305 |
| 1 | 31.375141803 | 39.132601391 | 27.110208400 | 1 | 36.397742655 | 35.966288478 | 37.212454628 |
| 8 | 33.694256995 | 38.867091284 | 32.729613877 | 1 | 34.893162606 | 36.467058185 | 38.005268946 |
| 1 | 32.866291275 | 39.352195942 | 32.506358970 | 1 | 35.747133885 | 38.944169078 | 37.406259768 |
| 1 | 34.776616571 | 39.771219364 | 31.764625212 | 1 | 36.683559981 | 38.097397599 | 36.143659347 |
| 8 | 35.260765467 | 40.443875653 | 31.228796766 | 8 | 31.831136690 | 37.833722784 | 34.747707126 |
| 1 | 33.577084854 | 39.100226073 | 35.101372829 | 8 | 33.519284183 | 38.516297992 | 36.432249546 |
| 1 | 35.545121142 | 39.947272444 | 30.442966492 | 8 | 35.827574161 | 38.879952540 | 29.075258986 |
| 1 | 35.074354637 | 34.713207204 | 29.453996159 | 6 | 35.246123826 | 38.432663798 | 28.094086159 |
| 1 | 28.992842545 | 37.920389423 | 30.664642308 | 7 | 33.908822346 | 38.758273180 | 27.816104778 |
| 1 | 32.578833414 | 32.138079694 | 34.856206999 | 6 | 33.197352261 | 39.649633186 | 28.751144715 |
| 1 | 28.780106734 | 44.591388873 | 34.647540736 | 6 | 33.215084631 | 38.267120364 | 26.727782861 |
| 1 | 36.747301752 | 37.148352038 | 27.381256453 | 7 | 31.962263209 | 38.606253579 | 26.526330168 |

**IM6**

**QM/MM (BS1) = -3580.796277 a.u.**

**QM/MM (BS2+ZPE) = -3582.948764 a.u.**

|   |              |              |              |   |              |              |              |
|---|--------------|--------------|--------------|---|--------------|--------------|--------------|
| 6 | 34.977870178 | 35.238519877 | 30.446338188 | 1 | 33.894099127 | 40.027218849 | 29.500720859 |
| 7 | 35.760876655 | 34.892564583 | 31.522028987 | 1 | 31.446755931 | 38.247840870 | 25.715260987 |
| 1 | 36.520622491 | 34.195773668 | 31.512478481 | 1 | 35.753173295 | 36.452379025 | 25.392284638 |
| 6 | 35.324258243 | 35.566861850 | 32.595174693 | 1 | 33.410991806 | 36.980463910 | 24.972435562 |
| 1 | 35.760875618 | 35.507222717 | 33.587528432 | 1 | 32.381220415 | 39.101117621 | 29.241556222 |
| 7 | 34.284757654 | 36.327953113 | 32.263666002 | 1 | 31.385232393 | 39.183823167 | 27.167202542 |
| 6 | 34.052988925 | 36.137944762 | 30.922459697 | 8 | 33.472042901 | 38.890436018 | 32.975628296 |
| 1 | 33.226202126 | 36.625537283 | 30.414656213 | 1 | 32.685881230 | 39.190922545 | 32.424289056 |
| 6 | 29.203055000 | 38.152491295 | 31.608152664 | 1 | 34.681258868 | 39.679139268 | 31.987767854 |
| 1 | 28.748390046 | 37.395862732 | 32.264947865 | 8 | 35.212523875 | 40.291223934 | 31.430961123 |
| 1 | 28.737633730 | 39.126860025 | 31.812143217 | 1 | 32.423883087 | 38.212926830 | 35.525603344 |
| 6 | 30.696135265 | 38.247908118 | 31.868422345 | 1 | 35.466164769 | 39.754428999 | 30.660508624 |
| 8 | 31.223918318 | 39.395099755 | 31.826629757 | 1 | 35.043163014 | 34.726934088 | 29.486086060 |
| 8 | 31.349326785 | 37.195240678 | 32.136100137 | 1 | 28.981626136 | 37.869948692 | 30.578975195 |
| 6 | 32.345507301 | 33.077569816 | 34.486278679 | 1 | 32.557450824 | 32.057636804 | 34.807029028 |
| 7 | 31.277678112 | 33.382060045 | 33.674383913 | 1 | 28.771563401 | 44.506356725 | 34.642701569 |
| 1 | 30.538789358 | 32.757900973 | 33.325284941 | 1 | 36.749336676 | 37.173504817 | 27.437601892 |

**TS5**

**QM/MM (BS1) = -3580.776832 a.u.**

**QM/MM (BS2+ZPE) = -3582.933015 a.u.**

|   |              |              |              |   |              |              |              |
|---|--------------|--------------|--------------|---|--------------|--------------|--------------|
| 6 | 35.053840208 | 35.243862678 | 30.364342956 | 6 | 33.034099159 | 34.631115075 | 34.637505488 |
| 7 | 35.769485956 | 34.883502936 | 31.481294182 | 6 | 33.034099159 | 34.631115075 | 34.637505488 |
| 1 | 36.501300594 | 34.156552125 | 31.516964539 | 6 | 33.034099159 | 34.631115075 | 34.637505488 |
| 6 | 35.321180845 | 35.599128533 | 32.520809383 | 6 | 33.034099159 | 34.631115075 | 34.637505488 |
| 1 | 35.715438512 | 35.542493809 | 33.529931579 | 6 | 33.034099159 | 34.631115075 | 34.637505488 |
| 7 | 34.337740996 | 36.403659698 | 32.123348568 | 6 | 33.034099159 | 34.631115075 | 34.637505488 |
| 6 | 34.157197774 | 36.199926748 | 30.776182791 | 6 | 33.034099159 | 34.631115075 | 34.637505488 |
| 1 | 33.382272187 | 36.715034132 | 30.217256563 | 6 | 33.034099159 | 34.631115075 | 34.637505488 |
| 6 | 29.309216185 | 38.287356203 | 31.333403101 | 6 | 33.034099159 | 34.631115075 | 34.637505488 |
| 1 | 28.854557322 | 37.617364803 | 32.077861117 | 6 | 33.034099159 | 34.631115075 | 34.637505488 |
| 1 | 28.878173783 | 39.291927088 | 31.438065111 | 6 | 33.034099159 | 34.631115075 | 34.637505488 |
| 6 | 30.800618530 | 38.354709190 | 31.555703044 | 6 | 33.034099159 | 34.631115075 | 34.637505488 |
| 8 | 31.373610020 | 39.473961458 | 31.413694413 | 6 | 33.034099159 | 34.631115075 | 34.637505488 |
| 8 | 31.425028829 | 37.317505970 | 31.930990628 | 6 | 33.034099159 | 34.631115075 | 34.637505488 |
| 6 | 32.389782572 | 33.425359445 | 34.458020112 | 6 | 33.034099159 | 34.631115075 | 34.637505488 |
| 7 | 31.339137588 | 33.700204493 | 33.613399754 | 6 | 33.034099159 | 34.631115075 | 34.637505488 |
| 1 | 30.638520659 | 33.046005684 | 33.238128221 | 6 | 33.034099159 | 34.631115075 | 34.637505488 |
| 6 | 31.365250993 | 35.000432623 | 33.297443709 | 6 | 33.034099159 | 34.631115075 | 34.637505488 |
| 1 | 30.673710533 | 35.484889823 | 32.617500814 | 6 | 33.034099159 | 34.631115075 | 34.637505488 |
| 7 | 32.382880201 | 35.606819034 | 33.904102466 | 6 | 33.034099159 | 34.631115075 | 34.637505488 |

|    |              |              |              |
|----|--------------|--------------|--------------|
| 1  | 33.919710084 | 34.866389428 | 35.219640838 |
| 6  | 29.356543713 | 44.098781143 | 33.912732178 |
| 1  | 29.783335066 | 45.027172698 | 33.492906364 |
| 1  | 28.693454616 | 43.659720662 | 33.155658936 |
| 7  | 30.399095000 | 43.151737693 | 34.283056730 |
| 1  | 31.053282552 | 43.429803499 | 35.016457079 |
| 6  | 30.626756239 | 41.913962643 | 33.738871458 |
| 7  | 29.942917678 | 41.567491618 | 32.622360211 |
| 1  | 29.720291629 | 42.318157846 | 31.966508015 |
| 1  | 30.372368019 | 40.785035908 | 32.112981139 |
| 7  | 31.463443007 | 41.066010961 | 34.308402923 |
| 1  | 31.922154177 | 41.455729123 | 35.131506791 |
| 1  | 31.669114402 | 39.762635580 | 34.192924848 |
| 26 | 33.073017664 | 37.541239518 | 33.275358401 |
| 6  | 36.818873599 | 40.993880133 | 33.384818085 |
| 8  | 35.816450654 | 40.996679904 | 33.976550822 |
| 8  | 37.858400060 | 40.997339216 | 32.862441203 |
| 6  | 34.325081923 | 38.013654744 | 35.951577107 |
| 8  | 34.451914025 | 37.496927977 | 34.769972899 |
| 6  | 35.585001390 | 38.167886919 | 36.787703281 |
| 6  | 35.752444491 | 36.924087604 | 37.676329971 |
| 6  | 36.563583608 | 37.113716874 | 38.968832781 |
| 8  | 36.116817117 | 36.505107797 | 39.976627419 |
| 8  | 37.602343398 | 37.821169239 | 38.935237979 |
| 1  | 36.242017702 | 36.118433335 | 37.098478337 |
| 1  | 34.760829981 | 36.557586517 | 37.976115359 |
| 1  | 35.444657969 | 39.054393164 | 37.422640990 |
| 1  | 36.463586185 | 38.326779781 | 36.147199839 |
| 8  | 31.840881881 | 38.572264551 | 34.333197592 |
| 8  | 33.231824979 | 38.332816698 | 36.450299507 |
| 8  | 35.878374103 | 38.967414654 | 28.896073256 |
| 6  | 35.280856835 | 38.472364549 | 27.947678515 |
| 7  | 33.945378366 | 38.801062717 | 27.667597512 |
| 6  | 33.262620957 | 39.753194814 | 28.561799402 |
| 6  | 33.225666938 | 38.250671196 | 26.625399362 |
| 7  | 31.973928593 | 38.593095237 | 26.424929245 |
| 6  | 33.899126962 | 37.320995449 | 25.779121812 |
| 6  | 35.189652596 | 37.008348979 | 26.025950560 |
| 7  | 35.870208744 | 37.540535447 | 27.100674272 |
| 1  | 32.785434219 | 40.538997539 | 27.966734706 |
| 1  | 33.990621333 | 40.205757670 | 29.236654623 |
| 1  | 31.442842173 | 38.200679589 | 25.640752603 |
| 1  | 35.714378321 | 36.316644558 | 25.373423671 |
| 1  | 33.373682609 | 36.840140317 | 24.961988222 |
| 1  | 32.479953914 | 39.236567861 | 29.133505891 |
| 1  | 31.411580160 | 39.206735959 | 27.045338435 |
| 8  | 33.545623626 | 38.944263875 | 32.400307521 |
| 1  | 32.644012747 | 39.307957979 | 31.910922755 |
| 1  | 34.864435113 | 40.052194857 | 31.724932351 |
| 8  | 35.473298349 | 40.566808751 | 31.163828061 |
| 1  | 32.209823799 | 38.453480684 | 35.274791987 |
| 1  | 35.598710213 | 39.989827296 | 30.388996017 |
| 1  | 35.121142722 | 34.703884582 | 29.419905900 |
| 1  | 29.055032519 | 37.902378452 | 30.345855577 |
| 1  | 32.569528372 | 32.409366252 | 34.809469414 |
| 1  | 28.740448154 | 44.360383276 | 34.772998359 |
| 1  | 36.757237928 | 37.156514275 | 27.356954311 |

**IM7**

**QM/MM (BS1) = -3580.784869 a.u.**

**QM/MM (BS2+ZPE) = -3582.938244 a.u.**

|    |              |              |               |
|----|--------------|--------------|---------------|
| 6  | 35.072401888 | 35.222755946 | 30.343779414  |
| 7  | 35.786889982 | 34.854280969 | 31.457672572  |
| 1  | 36.515633424 | 34.125063480 | 31.491288837  |
| 6  | 35.342490548 | 35.567618584 | 32.500742124  |
| 1  | 35.737766543 | 35.499051035 | 33.509511470  |
| 7  | 34.363692801 | 36.379983921 | 32.110256332  |
| 6  | 34.182636361 | 36.182579280 | 30.762317707  |
| 1  | 33.412741504 | 36.703486812 | 30.201659577  |
| 6  | 29.310048433 | 38.319246815 | 31.266916451  |
| 1  | 28.824310498 | 37.698747538 | 32.034081325  |
| 1  | 28.911125968 | 39.340776652 | 31.319045665  |
| 6  | 30.787031830 | 38.325797659 | 31.529479776  |
| 8  | 31.365581067 | 39.490306267 | 31.380017811  |
| 8  | 31.405248660 | 37.330039475 | 31.920615764  |
| 6  | 32.400426559 | 33.378114643 | 34.466389410  |
| 7  | 31.341625578 | 33.664237855 | 33.6637000705 |
| 1  | 30.629354213 | 33.018133887 | 33.270149519  |
| 6  | 31.378217614 | 34.966340411 | 33.323880150  |
| 1  | 30.671068880 | 35.452461142 | 32.661955835  |
| 7  | 32.411007903 | 35.561657630 | 33.914855316  |
| 6  | 33.059595522 | 34.576843201 | 34.636563902  |
| 1  | 33.955608696 | 34.801935258 | 35.207134363  |
| 6  | 29.372082395 | 44.232621298 | 33.920707175  |
| 1  | 29.780927246 | 45.191702250 | 33.555050199  |
| 1  | 28.723860643 | 43.823656081 | 33.135137691  |
| 7  | 30.436336034 | 43.295477881 | 34.231773078  |
| 1  | 31.103604975 | 43.552982950 | 34.960219105  |
| 6  | 30.579741094 | 42.018618255 | 33.736289819  |
| 7  | 29.794233492 | 41.690772888 | 32.655490131  |
| 1  | 29.699679159 | 42.421880725 | 31.946026231  |
| 1  | 30.154267822 | 40.858980967 | 32.196515938  |
| 7  | 31.386643020 | 41.135655137 | 34.256759769  |
| 1  | 31.878522751 | 41.524545635 | 35.064864843  |
| 1  | 31.623403727 | 39.452599012 | 34.245901343  |
| 26 | 33.135400147 | 37.492138563 | 33.322407804  |
| 6  | 36.806870113 | 40.997555983 | 33.361962571  |
| 8  | 35.818733149 | 40.997560677 | 33.976243878  |
| 8  | 37.832922181 | 41.003878043 | 32.812304771  |
| 6  | 34.307998325 | 38.024983010 | 36.006364860  |
| 8  | 34.459920054 | 37.482337142 | 34.841075451  |
| 6  | 35.550122233 | 38.195923206 | 36.863312788  |
| 6  | 35.756853411 | 36.926026065 | 37.704296337  |
| 6  | 36.566923632 | 37.106811000 | 38.996497352  |
| 8  | 36.114439444 | 36.505263666 | 40.005850042  |
| 8  | 37.610119726 | 37.808159893 | 38.961074349  |
| 1  | 36.265763997 | 36.155335706 | 37.096761839  |
| 1  | 34.776934369 | 36.524009918 | 37.996586433  |
| 1  | 35.367771764 | 39.051265774 | 37.529246006  |
| 1  | 36.429675528 | 38.412362813 | 36.240822719  |
| 8  | 31.735269289 | 38.444330966 | 34.422720036  |
| 8  | 33.204670830 | 38.352539785 | 36.479220600  |
| 8  | 35.868826094 | 38.941129563 | 28.900799799  |
| 6  | 35.286610897 | 38.454428594 | 27.938860348  |
| 7  | 33.953622741 | 38.782641803 | 27.644645020  |
| 6  | 33.259986194 | 39.727289159 | 28.535880750  |
| 6  | 33.244145648 | 38.234384634 | 26.594099258  |
| 7  | 31.991179931 | 38.570789226 | 26.388786153  |
| 6  | 33.929730118 | 37.315185109 | 25.747429635  |

|   |              |              |              |
|---|--------------|--------------|--------------|
| 6 | 35.219862362 | 37.009242484 | 26.003208416 |
| 7 | 35.887599663 | 37.533844006 | 27.089432637 |
| 1 | 32.802750761 | 40.527555843 | 27.944292453 |
| 1 | 33.974545272 | 40.161271078 | 29.237261415 |
| 1 | 31.467076491 | 38.181123579 | 25.598812575 |
| 1 | 35.755811307 | 36.329827618 | 25.347423536 |
| 1 | 33.415545890 | 36.838393625 | 24.920910849 |
| 1 | 32.457612988 | 39.205078957 | 29.073415697 |
| 1 | 31.424512638 | 39.184223955 | 27.004827424 |
| 8 | 33.587230219 | 38.883354430 | 32.581543659 |
| 1 | 32.307120968 | 39.432132357 | 31.738450502 |
| 1 | 34.826184091 | 40.010433866 | 31.758622807 |
| 8 | 35.408455202 | 40.528021048 | 31.173478079 |
| 1 | 32.160472019 | 38.390285474 | 35.351959238 |
| 1 | 35.562193390 | 39.932662363 | 30.418479069 |
| 1 | 35.131711815 | 34.681989022 | 29.399257954 |
| 1 | 29.053111357 | 37.896916422 | 30.295480554 |
| 1 | 32.580526855 | 32.360325306 | 34.812418418 |
| 1 | 28.741440308 | 44.437940954 | 34.785693718 |
| 1 | 36.773706421 | 37.150183002 | 27.349416366 |

**TS6**

**QM/MM (BS1) = -3580.776499 a.u.**

**QM/MM (BS2+ZPE) = -3582.927398 a.u.**

|    |              |              |              |
|----|--------------|--------------|--------------|
| 6  | 35.030665112 | 35.279114847 | 30.414406119 |
| 7  | 35.751180731 | 34.916209026 | 31.526179102 |
| 1  | 36.477430986 | 34.184150110 | 31.555956684 |
| 6  | 35.313452052 | 35.639958966 | 32.567102449 |
| 1  | 35.709757144 | 35.571998579 | 33.575974762 |
| 7  | 34.334259804 | 36.453954931 | 32.179561761 |
| 6  | 34.144833013 | 36.244146217 | 30.833998078 |
| 1  | 33.377920122 | 36.770468433 | 30.273593085 |
| 6  | 29.160648778 | 38.206605448 | 31.441647021 |
| 1  | 28.765265318 | 37.443173379 | 32.128733005 |
| 1  | 28.604325726 | 39.140403967 | 31.596120025 |
| 6  | 30.609839664 | 38.443572110 | 31.775745316 |
| 8  | 30.929372228 | 39.709498712 | 31.752122822 |
| 8  | 31.368925886 | 37.524821921 | 32.099276507 |
| 6  | 32.353126326 | 33.364049836 | 34.440752031 |
| 7  | 31.330483233 | 33.646143380 | 33.565754159 |
| 1  | 30.638478562 | 32.994774050 | 33.171325768 |
| 6  | 31.362549586 | 34.954391562 | 33.273100100 |
| 1  | 30.679127191 | 35.444021824 | 32.587975369 |
| 7  | 32.354787006 | 35.554605332 | 33.922535091 |
| 6  | 32.984919542 | 34.569610967 | 34.657730410 |
| 1  | 33.851214740 | 34.803064385 | 35.269097363 |
| 6  | 29.660892975 | 44.550354157 | 33.991534100 |
| 1  | 30.201834142 | 45.496782306 | 34.147123504 |
| 1  | 29.250288525 | 44.585462188 | 32.970106977 |
| 7  | 30.622264243 | 43.472881675 | 34.144106939 |
| 1  | 31.387419773 | 43.626613715 | 34.803641050 |
| 6  | 30.557071183 | 42.210725302 | 33.608044009 |
| 7  | 29.457923179 | 41.932515650 | 32.835138420 |
| 1  | 29.072895548 | 42.717309773 | 32.317756346 |
| 1  | 29.628945486 | 41.154577515 | 32.201261970 |
| 7  | 31.464056884 | 41.284854006 | 33.831529013 |
| 1  | 32.235122731 | 41.648117360 | 34.396105278 |
| 1  | 31.523057327 | 39.363522436 | 34.448895540 |
| 26 | 33.068660540 | 37.511571523 | 33.455060280 |
| 6  | 36.523115403 | 41.169378085 | 33.345389782 |
| 8  | 35.559896269 | 41.306379540 | 33.984843500 |

|   |              |              |              |
|---|--------------|--------------|--------------|
| 8 | 37.536875488 | 41.052367253 | 32.785155448 |
| 6 | 34.279808333 | 37.989000434 | 36.132409742 |
| 8 | 34.368938821 | 37.386668431 | 34.993680422 |
| 6 | 35.551461956 | 38.143225349 | 36.944825722 |
| 6 | 35.791516489 | 36.858741146 | 37.756071844 |
| 6 | 36.583062924 | 37.054662175 | 39.055393801 |
| 8 | 36.111576357 | 36.481280025 | 40.071978730 |
| 8 | 37.629959915 | 37.751307989 | 39.018239727 |
| 1 | 36.329007171 | 36.117706547 | 37.137635707 |
| 1 | 34.823699339 | 36.420330543 | 38.034776626 |
| 1 | 35.395913833 | 38.989043388 | 37.628903836 |
| 1 | 36.406612623 | 38.368298641 | 36.291683051 |
| 8 | 31.616334416 | 38.404514977 | 34.678333164 |
| 8 | 33.207057801 | 38.388880392 | 36.623605569 |
| 8 | 35.800343668 | 38.930482279 | 29.005094073 |
| 6 | 35.238823905 | 38.464087719 | 28.021284038 |
| 7 | 33.902492487 | 38.777067804 | 27.718825802 |
| 6 | 33.179213436 | 39.692958394 | 28.618778334 |
| 6 | 33.217438745 | 38.247251071 | 26.642763562 |
| 7 | 31.959117531 | 38.560350019 | 26.432754173 |
| 6 | 33.933638277 | 37.375721860 | 25.771229800 |
| 6 | 35.226121360 | 37.086250823 | 26.033160547 |
| 7 | 35.868187658 | 37.582437051 | 27.148036980 |
| 1 | 32.710181298 | 40.489406079 | 28.030718342 |
| 1 | 33.874124057 | 40.136691393 | 29.332717920 |
| 1 | 31.454338253 | 38.187404701 | 25.622221392 |
| 1 | 35.786233109 | 36.445002469 | 25.358308940 |
| 1 | 33.441724727 | 36.923024609 | 24.918380276 |
| 1 | 32.387016541 | 39.144682497 | 29.147308109 |
| 1 | 31.369564846 | 39.141189864 | 27.058860554 |
| 8 | 33.576027728 | 38.953082502 | 32.929886204 |
| 1 | 31.609272758 | 40.065951094 | 32.409731686 |
| 1 | 34.549787077 | 40.014972820 | 31.789132871 |
| 8 | 35.152894018 | 40.552390449 | 31.242785032 |
| 1 | 32.127121274 | 38.393356676 | 35.91720322  |
| 1 | 35.411168632 | 39.951099057 | 30.522380032 |
| 1 | 35.104697909 | 34.744778612 | 29.467267666 |
| 1 | 28.976123100 | 37.855571544 | 30.426367361 |
| 1 | 32.536729924 | 32.347354193 | 34.788152397 |
| 1 | 28.833560066 | 44.539515823 | 34.701090373 |
| 1 | 36.755005202 | 37.196776694 | 27.402582106 |

**IM8**

**QM/MM (BS1) = -3580.809733 a.u.**

**QM/MM (BS2+ZPE) = -3582.969357 a.u.**

|   |              |              |               |
|---|--------------|--------------|---------------|
| 6 | 34.989439548 | 35.268346148 | 30.413311463  |
| 7 | 35.753019447 | 34.922049656 | 31.501966613  |
| 1 | 36.497616706 | 34.209145342 | 31.509926852  |
| 6 | 35.323076194 | 35.628946756 | 32.558551415  |
| 1 | 35.741636400 | 35.565055159 | 33.558661395  |
| 7 | 34.309398379 | 36.414087220 | 32.205317362  |
| 6 | 34.085472830 | 36.202024803 | 30.866127742  |
| 1 | 33.281357027 | 36.705248104 | 30.336525791  |
| 6 | 29.034929403 | 38.122967364 | 31.747740848  |
| 1 | 28.530309233 | 37.332057968 | 32.3320740038 |
| 1 | 28.467894110 | 39.046804349 | 31.923063558  |
| 6 | 30.417381037 | 38.304420962 | 32.358646401  |
| 8 | 30.575392554 | 39.359614976 | 33.030101389  |
| 8 | 31.274256690 | 37.367322250 | 32.297842486  |
| 6 | 32.336408193 | 33.136721191 | 34.445418285  |
| 7 | 31.295645542 | 33.423071642 | 33.592819554  |

|    |              |              |              |
|----|--------------|--------------|--------------|
| 1  | 30.575605770 | 32.784860448 | 33.230988826 |
| 6  | 31.348682041 | 34.725218088 | 33.274234138 |
| 1  | 30.655147752 | 35.230675041 | 32.610040134 |
| 7  | 32.372188841 | 35.307697033 | 33.884566068 |
| 6  | 33.003338308 | 34.328257817 | 34.618471517 |
| 1  | 33.894516701 | 34.556517281 | 35.193926539 |
| 6  | 29.589739369 | 44.714697491 | 33.756461934 |
| 1  | 30.011874855 | 45.729370471 | 33.714979645 |
| 1  | 29.084939590 | 44.542116539 | 32.796581692 |
| 7  | 30.699635498 | 43.791074733 | 33.937450724 |
| 1  | 31.432149888 | 44.061519804 | 34.595275339 |
| 6  | 30.720493384 | 42.489037133 | 33.568992840 |
| 7  | 29.723036329 | 41.950770884 | 32.854895866 |
| 1  | 29.331168871 | 42.502341088 | 32.092564026 |
| 1  | 29.845589149 | 40.938659365 | 32.673035929 |
| 7  | 31.733873203 | 41.721626382 | 33.967063399 |
| 1  | 32.459097086 | 42.097262704 | 34.575396700 |
| 1  | 31.166565595 | 38.621891947 | 34.599390205 |
| 26 | 32.958879497 | 37.292780708 | 33.560459846 |
| 6  | 36.243663036 | 41.314233541 | 33.335292138 |
| 8  | 35.323709762 | 41.548551782 | 34.012520851 |
| 8  | 37.233456033 | 41.128500624 | 32.752334108 |
| 6  | 34.428261834 | 37.863986585 | 36.077858273 |
| 8  | 34.362271299 | 37.090529348 | 35.049401226 |
| 6  | 35.755101046 | 37.965395281 | 36.810883583 |
| 6  | 35.893048426 | 36.755630726 | 37.754254856 |
| 6  | 36.629248303 | 37.023757017 | 39.071721496 |
| 8  | 36.128211345 | 36.484891655 | 40.093861278 |
| 8  | 37.668735600 | 37.732598197 | 39.047057725 |
| 1  | 36.419908249 | 35.931492238 | 37.241140359 |
| 1  | 34.895342218 | 36.383394140 | 38.024135972 |
| 1  | 35.731798874 | 38.892675554 | 37.399779639 |
| 1  | 36.594339676 | 38.024512604 | 36.103030975 |
| 8  | 31.559430812 | 37.840807430 | 35.043511768 |
| 8  | 33.452728550 | 38.472496753 | 36.559461672 |
| 8  | 35.709621981 | 38.917617583 | 29.136172415 |
| 6  | 35.170440366 | 38.476644990 | 28.128179155 |
| 7  | 33.832970900 | 38.777307706 | 27.815834157 |
| 6  | 33.079398716 | 39.658635809 | 28.724951309 |
| 6  | 33.171439573 | 38.274444024 | 26.712634856 |
| 7  | 31.908146496 | 38.567319532 | 26.501377910 |
| 6  | 33.918627540 | 37.459473388 | 25.812970206 |
| 6  | 35.212138015 | 37.181841587 | 26.083110058 |
| 7  | 35.828000207 | 37.640161949 | 27.229019626 |
| 1  | 32.635905979 | 40.479012488 | 28.148423957 |
| 1  | 33.745124386 | 40.069044347 | 29.484585859 |
| 1  | 31.417988464 | 38.211697996 | 25.673603381 |
| 1  | 35.794811909 | 36.580590587 | 25.389866880 |
| 1  | 33.449571902 | 37.038100763 | 24.931886948 |
| 1  | 32.268583794 | 39.090646542 | 29.202202332 |
| 1  | 31.294887019 | 39.096100031 | 27.150459813 |
| 8  | 33.386910241 | 38.826392468 | 33.251973175 |
| 1  | 31.815384592 | 40.763458129 | 33.606100246 |
| 1  | 34.274010191 | 39.790304888 | 31.985322473 |
| 8  | 34.835236896 | 40.389143273 | 31.452731829 |
| 1  | 32.224891518 | 38.174009510 | 35.751847632 |
| 1  | 35.202621259 | 39.819961521 | 30.753948843 |
| 1  | 35.055539174 | 34.740407391 | 29.462007712 |
| 1  | 28.931411856 | 37.848800796 | 30.697891271 |
| 1  | 32.541700808 | 32.120384959 | 34.781547620 |
| 1  | 28.851073817 | 44.687459002 | 34.557522850 |
| 1  | 36.715979089 | 37.253274827 | 27.477584207 |

**IM9**

**QM/MM (BS1) = -3580.809487 a.u.**

**QM/MM (BS2+ZPE) = -3582.964970 a.u.**

|    |              |              |              |
|----|--------------|--------------|--------------|
| 6  | 35.056123634 | 35.265828735 | 30.419145070 |
| 7  | 35.809354446 | 34.865776794 | 31.495686655 |
| 1  | 36.544826344 | 34.144713451 | 31.481522453 |
| 6  | 35.392960490 | 35.536502427 | 32.578478410 |
| 1  | 35.814377544 | 35.428049741 | 33.573172933 |
| 7  | 34.394999906 | 36.352794535 | 32.254469689 |
| 6  | 34.170604829 | 36.199682585 | 30.907055802 |
| 1  | 33.386707402 | 36.745921943 | 30.390758050 |
| 6  | 29.276528658 | 38.226136306 | 31.827512382 |
| 1  | 28.814154681 | 37.455004603 | 32.460267933 |
| 1  | 28.779640005 | 39.187022160 | 32.030585469 |
| 6  | 30.760666256 | 38.388088627 | 32.155888170 |
| 8  | 31.318948153 | 39.466595814 | 31.915791831 |
| 8  | 31.334662976 | 37.374985689 | 32.716262645 |
| 6  | 32.366377930 | 33.063706557 | 34.483507712 |
| 7  | 31.287828848 | 33.403788068 | 33.701131590 |
| 1  | 30.534350159 | 32.797603020 | 33.351496080 |
| 6  | 31.363059469 | 34.713206685 | 33.417047562 |
| 1  | 30.640293799 | 35.259084927 | 32.819845546 |
| 7  | 32.439474511 | 35.249212226 | 33.980498712 |
| 6  | 33.082970033 | 34.225838392 | 34.643415551 |
| 1  | 34.020536114 | 34.393334638 | 35.164217041 |
| 6  | 29.369034969 | 44.333961541 | 33.717888226 |
| 1  | 29.690952561 | 45.300972685 | 33.295641146 |
| 1  | 28.715049932 | 43.847340594 | 32.983277770 |
| 7  | 30.524305200 | 43.492940985 | 34.001594733 |
| 1  | 31.179859877 | 43.804688865 | 34.719017380 |
| 6  | 30.809996784 | 42.299420119 | 33.428590463 |
| 7  | 30.035128952 | 41.777925814 | 32.470574676 |
| 1  | 29.649280736 | 42.414291752 | 31.771702799 |
| 1  | 30.415210966 | 40.904842939 | 32.046572432 |
| 7  | 31.859624376 | 41.606919228 | 33.873192572 |
| 1  | 32.440299859 | 41.973604147 | 34.626319946 |
| 1  | 32.153437290 | 40.754874683 | 33.383736283 |
| 26 | 33.088860072 | 37.222360276 | 33.635875404 |
| 6  | 36.211455271 | 41.262510470 | 33.415914223 |
| 8  | 35.297106651 | 41.486594429 | 34.10341888  |
| 8  | 37.198610515 | 41.085556429 | 32.825466171 |
| 6  | 33.890773529 | 37.351819008 | 36.035948726 |
| 8  | 34.617537873 | 36.819824112 | 35.151987030 |
| 6  | 34.406666127 | 37.557504019 | 37.443194081 |
| 6  | 35.905756829 | 37.839478285 | 37.506313999 |
| 6  | 36.590630731 | 37.640363105 | 38.868563873 |
| 8  | 36.050068413 | 36.902557678 | 39.734083880 |
| 8  | 37.701662543 | 38.220038623 | 38.993478274 |
| 1  | 36.134877349 | 38.858956126 | 37.160368405 |
| 1  | 36.421965442 | 37.166512142 | 36.801478013 |
| 1  | 34.196333342 | 36.629574027 | 37.996827722 |
| 1  | 33.810373782 | 38.342121666 | 37.932254858 |
| 8  | 30.395125376 | 38.382750959 | 37.132872038 |
| 8  | 32.707989509 | 37.696113082 | 35.712108559 |
| 8  | 35.713226387 | 38.982051634 | 29.193396436 |
| 6  | 35.183726298 | 38.552501532 | 28.174775058 |
| 7  | 33.849372500 | 38.855566862 | 27.852916517 |
| 6  | 33.095662053 | 39.750647398 | 28.750120609 |
| 6  | 33.195597335 | 38.346771626 | 26.747984399 |
| 7  | 31.927122802 | 38.616136636 | 26.537754464 |
| 6  | 33.956245550 | 37.558473799 | 25.837449495 |

|   |              |              |              |
|---|--------------|--------------|--------------|
| 6 | 35.250854109 | 37.291968786 | 26.109812649 |
| 7 | 35.852976765 | 37.730501015 | 27.270703992 |
| 1 | 32.622711188 | 40.539351590 | 28.153309110 |
| 1 | 33.769333134 | 40.201718862 | 29.478218788 |
| 1 | 31.445267059 | 38.258880296 | 25.706195307 |
| 1 | 35.847026812 | 36.723154494 | 25.402488752 |
| 1 | 33.498462953 | 37.152847648 | 24.943134669 |
| 1 | 32.309944256 | 39.192386567 | 29.276472242 |
| 1 | 31.308125457 | 39.139497068 | 27.185163759 |
| 8 | 33.585642132 | 38.740668701 | 33.372848022 |
| 1 | 31.258714114 | 38.196778176 | 36.713534750 |
| 1 | 34.239794346 | 39.800932349 | 32.000554750 |
| 8 | 34.786220228 | 40.440513695 | 31.502602859 |
| 1 | 29.769682584 | 38.084649539 | 36.458189667 |
| 1 | 35.175668325 | 39.908546597 | 30.786428515 |
| 1 | 35.104611674 | 34.758426051 | 29.455683214 |
| 1 | 29.082846244 | 37.962271654 | 30.787834602 |
| 1 | 32.566963608 | 32.038476989 | 34.794533502 |
| 1 | 28.775037756 | 44.520515825 | 34.612556950 |
| 1 | 36.738036826 | 37.338553873 | 27.521739080 |

**Cartesian coordinates for direct hydrogen transfer from IM6**

**TS5**

**QM/MM (BS1) = -3580.768659 a.u.**

**QM/MM (BS2+ZPE) = -3582.923454 a.u.**

|   |              |              |              |
|---|--------------|--------------|--------------|
| 6 | 34.986517860 | 35.264723205 | 30.439962813 |
| 7 | 35.771527088 | 34.921154791 | 31.516033557 |
| 1 | 36.521556303 | 34.213705606 | 31.509512268 |
| 6 | 35.353642128 | 35.616567654 | 32.582122923 |
| 1 | 35.793225959 | 35.554467111 | 33.572821559 |
| 7 | 34.322314908 | 36.393413090 | 32.250423653 |
| 6 | 34.079069351 | 36.184054949 | 30.910820311 |
| 1 | 33.257638557 | 36.679095890 | 30.401358449 |
| 6 | 29.250841203 | 38.158504310 | 31.655163771 |
| 1 | 28.835058961 | 37.368766534 | 32.299748095 |
| 1 | 28.729630448 | 39.099861878 | 31.880073764 |
| 6 | 30.739650998 | 38.349422603 | 31.936184555 |
| 8 | 31.190666354 | 39.508952166 | 31.939532972 |
| 8 | 31.433681909 | 37.297828598 | 32.183241701 |
| 6 | 32.326418475 | 33.105603960 | 34.467852812 |
| 7 | 31.271554467 | 33.415491003 | 33.639365524 |
| 1 | 30.545867099 | 32.789033132 | 33.266837150 |
| 6 | 31.325886932 | 34.722844241 | 33.345010007 |
| 1 | 30.636029853 | 35.249573024 | 32.692868015 |
| 7 | 32.364069330 | 35.286733322 | 33.951027217 |
| 6 | 33.003212491 | 34.288484527 | 34.653155730 |
| 1 | 33.913096622 | 34.494392766 | 35.206788938 |
| 6 | 29.376579454 | 44.426978270 | 33.689963722 |
| 1 | 29.706920416 | 45.415265292 | 33.328824110 |
| 1 | 28.723704425 | 43.997308950 | 32.920312403 |
| 7 | 30.532309186 | 43.572992761 | 33.913695757 |
| 1 | 31.234952436 | 43.885305405 | 34.584804779 |
| 6 | 30.756959523 | 42.358353425 | 33.357599213 |
| 7 | 29.891806421 | 41.796982424 | 32.505296911 |
| 1 | 29.443715986 | 42.404036048 | 31.820208561 |
| 1 | 30.240199206 | 40.899739606 | 32.093899156 |
| 7 | 31.850123877 | 41.682043575 | 33.713230699 |
| 1 | 32.502171395 | 42.059894705 | 34.397605924 |
| 1 | 32.091900374 | 40.827807315 | 33.196232586 |

|    |              |              |              |
|----|--------------|--------------|--------------|
| 26 | 32.968821912 | 37.256054330 | 33.567423903 |
| 6  | 36.192155621 | 41.328927221 | 33.366318223 |
| 8  | 35.274480990 | 41.612000012 | 34.028347585 |
| 8  | 37.189002450 | 41.097471564 | 32.811551635 |
| 6  | 34.726850102 | 37.648332970 | 36.146821742 |
| 8  | 34.684493422 | 36.926483654 | 35.137030353 |
| 6  | 35.975757788 | 37.826615574 | 36.965767567 |
| 6  | 36.056419154 | 36.640083974 | 37.944548735 |
| 6  | 36.697470845 | 36.983301972 | 39.287642695 |
| 8  | 36.139809852 | 36.497201619 | 40.304639371 |
| 8  | 37.721937795 | 37.713296187 | 39.274651467 |
| 1  | 36.627187941 | 35.811046088 | 37.490879211 |
| 1  | 35.047302022 | 36.264448838 | 38.159478504 |
| 1  | 35.890235759 | 38.767457003 | 37.526114547 |
| 1  | 36.859116222 | 37.886398098 | 36.316224947 |
| 8  | 32.014831550 | 38.048534451 | 34.851704384 |
| 8  | 33.685006771 | 38.241934109 | 36.649514622 |
| 8  | 35.697708979 | 38.924215995 | 29.168957639 |
| 6  | 35.165306664 | 38.490983433 | 28.154055726 |
| 7  | 33.831801074 | 38.797055448 | 27.831278417 |
| 6  | 33.072012253 | 39.677675379 | 28.738114138 |
| 6  | 33.180196869 | 38.299617689 | 26.720436055 |
| 7  | 31.920650314 | 38.596331352 | 26.495838467 |
| 6  | 33.931894691 | 37.486613497 | 25.822642756 |
| 6  | 35.222546815 | 37.206740467 | 26.100639531 |
| 7  | 35.829323531 | 37.658066254 | 27.254102532 |
| 1  | 32.633646101 | 40.499666260 | 28.160059004 |
| 1  | 33.731586360 | 40.085476772 | 29.503520858 |
| 1  | 31.436421957 | 38.237563015 | 25.666476163 |
| 1  | 35.810179174 | 36.611095909 | 25.406913373 |
| 1  | 33.469501230 | 37.075022026 | 24.933479904 |
| 1  | 32.259271999 | 39.114555468 | 29.216308673 |
| 1  | 31.306579169 | 39.134870546 | 27.135788114 |
| 8  | 33.547319031 | 38.929233881 | 33.444303270 |
| 1  | 32.712473874 | 38.966321840 | 34.265278956 |
| 1  | 34.271306058 | 39.810872573 | 32.050149591 |
| 8  | 34.790384144 | 40.432095977 | 31.495371932 |
| 1  | 32.872616234 | 38.104600866 | 35.993565840 |
| 1  | 35.160419914 | 39.877138953 | 30.787606987 |
| 1  | 35.050723518 | 34.743839867 | 29.484648466 |
| 1  | 29.036876035 | 37.882897051 | 30.622532727 |
| 1  | 32.536508309 | 32.085419969 | 34.789029096 |
| 1  | 28.779608641 | 44.566130285 | 34.591257169 |
| 1  | 36.716366526 | 37.269315777 | 27.503101087 |

**IM7**

**QM/MM (BS1) = -3580.806871 a.u.**

**QM/MM (BS2+ZPE) = -3582.968370 a.u.**

|   |              |              |              |
|---|--------------|--------------|--------------|
| 6 | 35.015169416 | 35.276934208 | 30.486930898 |
| 7 | 35.768757041 | 34.908157457 | 31.575098978 |
| 1 | 36.501953689 | 34.184075221 | 31.578808764 |
| 6 | 35.348866552 | 35.615869225 | 32.635532576 |
| 1 | 35.763611883 | 35.532966449 | 33.635859090 |
| 7 | 34.351998444 | 36.423760136 | 32.287308424 |
| 6 | 34.128046426 | 36.223466764 | 30.945838907 |
| 1 | 33.335377425 | 36.744804961 | 30.417332839 |
| 6 | 29.279800074 | 38.213702598 | 31.679717759 |
| 1 | 28.843298869 | 37.445826764 | 32.335016129 |
| 1 | 28.784618055 | 39.174132402 | 31.885337353 |
| 6 | 30.772278453 | 38.374801859 | 31.956938739 |
| 8 | 31.286466634 | 39.497436698 | 31.818104738 |

|    |              |              |              |                                                          |              |              |              |
|----|--------------|--------------|--------------|----------------------------------------------------------|--------------|--------------|--------------|
| 8  | 31.404587596 | 37.333139607 | 32.368559119 | 1                                                        | 32.539693538 | 32.104049093 | 34.795944485 |
| 6  | 32.333054442 | 33.124359081 | 34.472934988 | 1                                                        | 28.780323755 | 44.529225194 | 34.630975398 |
| 7  | 31.291994489 | 33.426115517 | 33.624717480 | 1                                                        | 36.733096708 | 37.253382911 | 27.495651917 |
| 1  | 30.574352302 | 32.796704260 | 33.242886159 | <b>2OG rearrangement reaction states coordinates for</b> |              |              |              |
| 6  | 31.342520729 | 34.734294086 | 33.332839507 | <b>AlkBH2-dsDNA</b>                                      |              |              |              |
| 1  | 30.648591378 | 35.252658953 | 32.679707324 | <b>ES1</b>                                               |              |              |              |
| 7  | 32.363741669 | 35.307941957 | 33.956553309 | <b>QM/MM (BS1) = -3275.477127 a.u.</b>                   |              |              |              |
| 6  | 32.996420220 | 34.313902043 | 34.669913774 | <b>QM/MM (BS2+ZPE) = -3277.299466 a.u.</b>               |              |              |              |
| 1  | 33.888441196 | 34.531438343 | 35.247078107 | 6                                                        | 40.282292761 | 37.751724933 | 43.589363266 |
| 6  | 29.302166645 | 44.272483363 | 33.709112636 | 7                                                        | 39.163005387 | 36.975104270 | 43.775674071 |
| 1  | 29.575680357 | 45.201456024 | 33.179905494 | 1                                                        | 39.034422972 | 36.278106088 | 44.520428839 |
| 1  | 28.598277627 | 43.715208062 | 33.076868921 | 6                                                        | 38.288583132 | 37.250948135 | 42.797769544 |
| 7  | 30.479432250 | 43.457549849 | 33.979508854 | 1                                                        | 37.317404389 | 36.772601631 | 42.700839951 |
| 1  | 31.147644455 | 43.785005541 | 34.679059930 | 7                                                        | 38.779626021 | 38.173898505 | 41.975769360 |
| 6  | 30.774282098 | 42.274865956 | 33.392282093 | 6                                                        | 40.028939760 | 38.494947045 | 42.459444409 |
| 7  | 30.003191252 | 41.754926982 | 32.435247036 | 1                                                        | 40.669199452 | 39.209155104 | 41.951024720 |
| 1  | 29.597268756 | 42.391766279 | 31.748812506 | 6                                                        | 41.400547203 | 39.782137053 | 37.309684846 |
| 1  | 30.384836186 | 40.879255986 | 32.003277806 | 1                                                        | 41.255565919 | 38.871285437 | 36.712854810 |
| 7  | 31.830270549 | 41.580040739 | 33.836801492 | 1                                                        | 41.336485989 | 40.665567937 | 36.656453231 |
| 1  | 32.437463066 | 41.980034021 | 34.551100474 | 6                                                        | 40.358406632 | 39.891123473 | 38.410097035 |
| 1  | 32.178571987 | 40.782659886 | 33.290851769 | 8                                                        | 40.106312067 | 41.007737343 | 38.911264455 |
| 26 | 32.964360096 | 37.294316909 | 33.645538355 | 8                                                        | 39.780339824 | 38.808911892 | 38.744434771 |
| 6  | 36.203138340 | 41.349636843 | 33.313412892 | 6                                                        | 38.782531252 | 34.187572378 | 39.668170403 |
| 8  | 35.293037204 | 41.570230216 | 34.009195322 | 7                                                        | 39.930430542 | 34.700397421 | 34.700397421 |
| 8  | 37.187587875 | 41.191124983 | 32.713799558 | 1                                                        | 40.781853960 | 34.193792693 | 38.879589937 |
| 6  | 34.359183407 | 37.757403751 | 36.216531822 | 6                                                        | 39.780893195 | 36.031989019 | 38.976931727 |
| 8  | 34.314441624 | 37.042943614 | 35.146143500 | 1                                                        | 40.534430554 | 36.699475294 | 38.569109734 |
| 6  | 35.697206843 | 37.906057213 | 36.915155373 | 7                                                        | 38.591292727 | 36.408872739 | 39.431971381 |
| 6  | 35.914373343 | 36.680037211 | 37.823804537 | 6                                                        | 37.960114495 | 35.267451468 | 39.871612205 |
| 6  | 36.636840520 | 36.977066994 | 39.140275832 | 1                                                        | 36.968879627 | 35.300457449 | 40.317404650 |
| 8  | 36.116030077 | 36.481490447 | 40.174506341 | 6                                                        | 38.994893188 | 44.666414464 | 34.930489515 |
| 8  | 37.682298302 | 37.676298977 | 39.103937050 | 1                                                        | 39.292663714 | 45.703960115 | 35.161711995 |
| 1  | 36.487419608 | 35.903236178 | 37.287694267 | 1                                                        | 39.910149120 | 44.074640574 | 34.784711565 |
| 1  | 34.941922950 | 36.246890255 | 38.091080366 | 7                                                        | 38.193658745 | 44.065668876 | 35.988429154 |
| 1  | 35.644225574 | 38.816736359 | 37.528151509 | 1                                                        | 37.184597960 | 44.183793637 | 35.954201292 |
| 1  | 36.511294985 | 38.021638970 | 36.185817697 | 6                                                        | 38.662635124 | 43.196089911 | 36.916402194 |
| 8  | 31.487443089 | 37.924513730 | 35.127680813 | 7                                                        | 39.963407624 | 43.000256170 | 37.096504289 |
| 8  | 33.358711967 | 38.266929278 | 36.759820360 | 1                                                        | 40.687284053 | 43.718336753 | 36.930531761 |
| 8  | 35.728120965 | 38.918691003 | 29.155654594 | 1                                                        | 40.213146286 | 42.304187678 | 38.829445444 |
| 6  | 35.191290035 | 38.485399470 | 28.142494225 | 7                                                        | 37.774928313 | 42.475606170 | 37.614283991 |
| 7  | 33.860965651 | 38.803032208 | 27.819759403 | 1                                                        | 36.772676060 | 42.591927881 | 37.462036500 |
| 6  | 33.115992116 | 39.704161912 | 28.718277733 | 1                                                        | 38.069485928 | 41.851688789 | 38.370770508 |
| 6  | 33.200454774 | 38.298358798 | 26.717421264 | 26                                                       | 38.224643878 | 38.465417155 | 39.969836429 |
| 7  | 31.941360380 | 38.601045951 | 26.497181122 | 6                                                        | 35.913334785 | 40.253157098 | 39.832081770 |
| 6  | 33.942180479 | 37.471807441 | 25.824242676 | 8                                                        | 35.246710180 | 41.281702713 | 39.783504357 |
| 6  | 35.232605580 | 37.186813249 | 26.098904719 | 8                                                        | 37.137441473 | 40.107446920 | 39.495385406 |
| 7  | 35.846494814 | 37.643094486 | 27.246584738 | 6                                                        | 35.254082741 | 38.916423606 | 40.298987917 |
| 1  | 32.683826509 | 40.523168302 | 28.131311820 | 8                                                        | 36.002081530 | 37.975395969 | 40.545460052 |
| 1  | 33.785745513 | 40.112427753 | 29.474730192 | 6                                                        | 33.757074341 | 38.822944079 | 40.383049575 |
| 1  | 31.450917360 | 38.240069760 | 25.672404091 | 6                                                        | 33.211458010 | 37.414357027 | 40.166354010 |
| 1  | 35.813628155 | 36.582192470 | 25.407710197 | 6                                                        | 31.688009331 | 37.253944649 | 40.322705916 |
| 1  | 33.472940496 | 37.054490647 | 24.941141210 | 8                                                        | 31.062467699 | 38.169820787 | 40.936005044 |
| 1  | 32.299294643 | 39.158415139 | 29.209184566 | 8                                                        | 31.189347866 | 36.216972997 | 39.839800767 |
| 1  | 31.336931311 | 39.153617052 | 27.134169313 | 1                                                        | 33.689532205 | 36.715716548 | 40.875041787 |
| 8  | 33.387593213 | 38.852507344 | 33.453953315 | 1                                                        | 33.470906170 | 37.050372288 | 39.159312089 |
| 1  | 31.356513086 | 38.835642693 | 34.822377645 | 1                                                        | 33.325186726 | 39.549253263 | 39.677648042 |
| 1  | 34.228846098 | 39.697269156 | 32.030614600 | 1                                                        | 33.458348069 | 39.200822250 | 41.379623275 |
| 8  | 34.807216532 | 40.300613967 | 31.523565940 | 8                                                        | 39.281637951 | 41.845072898 | 43.986596878 |
| 1  | 32.154807701 | 38.044660339 | 35.906232205 | 6                                                        | 40.467664377 | 41.739037891 | 43.765971257 |
| 1  | 35.173045300 | 39.752397884 | 30.807584630 |                                                          |              |              |              |
| 1  | 35.080215857 | 34.762064356 | 29.528418865 |                                                          |              |              |              |
| 1  | 29.058820751 | 37.933451407 | 30.649817413 |                                                          |              |              |              |

|   |              |              |              |
|---|--------------|--------------|--------------|
| 7 | 41.021162078 | 42.184824478 | 42.537327240 |
| 6 | 40.081116520 | 42.800364872 | 41.587148542 |
| 6 | 42.343179516 | 42.049414471 | 42.200793867 |
| 7 | 42.800942644 | 42.428226195 | 41.026782792 |
| 6 | 43.227719783 | 41.484053669 | 43.163765992 |
| 6 | 42.720293915 | 41.042832595 | 44.333258465 |
| 7 | 41.385954510 | 41.180291349 | 44.662790563 |
| 1 | 39.177590432 | 43.075622065 | 42.138397160 |
| 1 | 39.838707461 | 42.092988561 | 40.780341804 |
| 1 | 43.811672782 | 42.355653769 | 40.846885441 |
| 1 | 43.385671206 | 40.519314717 | 45.010180229 |
| 1 | 44.279080261 | 41.339672467 | 42.924470405 |
| 1 | 40.534978406 | 43.706692287 | 41.162822981 |
| 1 | 42.235097195 | 42.694369759 | 40.225410070 |
| 1 | 41.199885566 | 37.603295827 | 44.158625565 |
| 1 | 42.402551833 | 39.743273037 | 37.736936101 |
| 1 | 38.685261182 | 33.143525251 | 39.965779958 |
| 1 | 38.424407458 | 44.649306005 | 34.001877292 |
| 1 | 41.028694678 | 40.793622772 | 45.512981908 |

**TS for 2OG rearrangement**

**QM/MM (BS1) = -3275.469836 a.u.**

**QM/MM (BS2+ZPE) = -3277.294776 a.u.**

|    |              |              |              |
|----|--------------|--------------|--------------|
| 6  | 40.326673354 | 37.695317544 | 43.660963213 |
| 7  | 39.208358777 | 36.919617205 | 43.852890917 |
| 1  | 39.073882688 | 36.233695347 | 44.606106673 |
| 6  | 38.339884739 | 37.169373250 | 42.864611922 |
| 1  | 37.365561873 | 36.697761839 | 42.773577841 |
| 7  | 38.840569423 | 38.070149172 | 42.024907749 |
| 6  | 40.083685909 | 38.409762669 | 42.511813578 |
| 1  | 40.724577725 | 39.114835255 | 41.993606999 |
| 6  | 41.351067934 | 39.821771746 | 37.416453728 |
| 1  | 41.182739583 | 38.900115416 | 36.841814761 |
| 1  | 41.283818443 | 40.689559044 | 36.743709712 |
| 6  | 40.322340948 | 39.960390616 | 38.529506907 |
| 8  | 39.998531129 | 41.101815877 | 38.931475021 |
| 8  | 39.821858595 | 38.884637812 | 38.974648089 |
| 6  | 38.729312494 | 34.257486927 | 39.702731043 |
| 7  | 39.869867698 | 34.794800832 | 39.146197728 |
| 1  | 40.727359138 | 34.302802952 | 38.914063322 |
| 6  | 39.701234795 | 36.126098071 | 39.038959186 |
| 1  | 40.450658165 | 36.809309355 | 38.649926413 |
| 7  | 38.506446442 | 36.483444752 | 39.495963061 |
| 6  | 37.891244690 | 35.325459878 | 39.916150143 |
| 1  | 36.897506354 | 35.333588300 | 40.358899905 |
| 6  | 38.965147633 | 44.706294008 | 34.910747457 |
| 1  | 39.251451516 | 45.748189755 | 35.136838638 |
| 1  | 39.886535427 | 44.122515166 | 34.771307024 |
| 7  | 38.165666486 | 44.102443033 | 35.966676534 |
| 1  | 37.154148683 | 44.191460516 | 35.918039854 |
| 6  | 38.644417271 | 43.228402823 | 36.884208240 |
| 7  | 39.948504570 | 43.045663123 | 37.063803125 |
| 1  | 40.667281333 | 43.770793549 | 36.910584673 |
| 1  | 40.190626344 | 42.361908019 | 37.809668508 |
| 7  | 37.771587458 | 42.491341853 | 37.579516310 |
| 1  | 36.765752897 | 42.553523757 | 37.419354588 |
| 1  | 38.106143227 | 41.837668566 | 38.290246468 |
| 26 | 38.177305962 | 38.561608731 | 40.111255678 |
| 6  | 35.854844321 | 40.130863548 | 39.565378003 |
| 8  | 35.302009404 | 41.225499348 | 39.503362192 |
| 8  | 36.954537495 | 39.765962004 | 39.013981337 |

|   |              |              |              |
|---|--------------|--------------|--------------|
| 6 | 35.224537453 | 39.000084269 | 40.415120219 |
| 8 | 36.003792106 | 38.215574658 | 40.949230898 |
| 6 | 33.729748458 | 38.889283544 | 40.533091677 |
| 6 | 33.218325265 | 37.481086659 | 40.204620733 |
| 6 | 31.695525220 | 37.286327529 | 40.350997166 |
| 8 | 31.052845251 | 38.187272433 | 40.967346815 |
| 8 | 31.218243532 | 36.246987423 | 39.853446248 |
| 1 | 33.712965851 | 36.744093286 | 40.861002308 |
| 1 | 33.480242740 | 37.200639868 | 39.171311945 |
| 1 | 33.259898922 | 39.642935580 | 39.887651170 |
| 1 | 33.449368327 | 39.147050592 | 41.568918936 |
| 8 | 39.328670886 | 41.841674845 | 43.959125769 |
| 6 | 40.519362740 | 41.733753828 | 40.967346115 |
| 7 | 41.100246559 | 42.196312297 | 42.553482873 |
| 6 | 40.181548917 | 42.836291002 | 41.598681044 |
| 6 | 42.425552717 | 42.046067568 | 42.235017882 |
| 7 | 42.913117394 | 42.435526280 | 41.077168938 |
| 6 | 43.283258660 | 41.448227607 | 43.202502650 |
| 6 | 42.751340379 | 41.001407965 | 44.357697373 |
| 7 | 41.414975167 | 41.157625783 | 44.671134059 |
| 1 | 39.286226114 | 43.144786341 | 42.146024234 |
| 1 | 39.918810646 | 42.136185215 | 40.791977994 |
| 1 | 43.925396995 | 42.342278232 | 40.914829730 |
| 1 | 43.398294496 | 40.455979344 | 45.034441990 |
| 1 | 44.335347985 | 41.288917548 | 42.978935814 |
| 1 | 40.663427653 | 43.724388043 | 41.168375437 |
| 1 | 42.378496340 | 42.745570367 | 40.268597627 |
| 1 | 41.246178145 | 37.556610445 | 44.229591922 |
| 1 | 42.363374179 | 39.772413072 | 37.817536141 |
| 1 | 38.651302195 | 33.205119054 | 39.975684484 |
| 1 | 38.397693665 | 44.677002454 | 33.980583322 |
| 1 | 41.044377518 | 40.772773188 | 45.516425937 |

**ES2**

**QM/MM (BS1) = -3275.479068 a.u.**

**QM/MM (BS2+ZPE) = -3277.302619 a.u.**

|   |              |              |              |
|---|--------------|--------------|--------------|
| 6 | 40.319343381 | 37.637908109 | 43.663323312 |
| 7 | 39.195953788 | 36.869798728 | 43.852338043 |
| 1 | 39.057527550 | 36.183861863 | 44.604791414 |
| 6 | 38.330866632 | 37.128818196 | 42.863153330 |
| 1 | 37.351834333 | 36.668045134 | 42.770634562 |
| 7 | 38.840497127 | 38.027801932 | 42.027683188 |
| 6 | 40.083353803 | 38.358035915 | 42.516239161 |
| 1 | 40.725501710 | 39.065315811 | 42.002703767 |
| 6 | 41.356727876 | 39.813460393 | 37.454826878 |
| 1 | 41.213009463 | 38.901491383 | 36.858006971 |
| 1 | 41.292671949 | 40.691985528 | 36.795954467 |
| 6 | 40.294832246 | 39.913982723 | 38.541785412 |
| 8 | 39.912133556 | 41.041365266 | 38.928859784 |
| 8 | 39.829170337 | 38.819647803 | 38.981023230 |
| 6 | 38.710393799 | 34.203224399 | 39.725214499 |
| 7 | 39.849147191 | 34.739284244 | 39.163621719 |
| 1 | 40.710443998 | 34.248555251 | 38.943927037 |
| 6 | 39.674291068 | 36.068372421 | 39.041194144 |
| 1 | 40.421135165 | 36.752725940 | 36.649164091 |
| 7 | 38.477438496 | 36.425154724 | 39.493391704 |
| 6 | 37.866688987 | 35.269055462 | 39.925483285 |
| 1 | 36.870316332 | 35.275554526 | 40.362721448 |
| 6 | 38.973776915 | 44.686320118 | 34.922736470 |
| 1 | 39.266055020 | 45.726817466 | 35.148837430 |
| 1 | 39.891339827 | 44.096575056 | 34.781111176 |



|    |              |              |              |    |              |              |              |
|----|--------------|--------------|--------------|----|--------------|--------------|--------------|
| 7  | 38.174028905 | 44.086367872 | 35.981381026 | 1  | 24.286630960 | 32.946873121 | 42.130072392 |
| 1  | 37.162484966 | 44.174589895 | 35.931247551 | 6  | 24.760952510 | 36.673214524 | 43.929300794 |
| 6  | 38.649637948 | 43.218871791 | 36.907538766 | 1  | 25.606130192 | 36.730086462 | 44.628103175 |
| 7  | 39.953940977 | 43.041440342 | 37.102732843 | 1  | 24.542277838 | 37.685845202 | 43.560509909 |
| 1  | 40.673410788 | 43.771470864 | 36.985558728 | 6  | 25.104440547 | 35.799184373 | 42.730590159 |
| 1  | 40.179867509 | 42.349162769 | 37.844619512 | 8  | 24.441684111 | 35.817233953 | 41.700004739 |
| 7  | 37.777454843 | 42.477221309 | 37.597689691 | 8  | 26.187657422 | 35.075084240 | 42.874987718 |
| 1  | 36.773020533 | 42.520771416 | 37.424352508 | 6  | 29.291152868 | 31.708420762 | 44.707088266 |
| 1  | 38.122357932 | 41.830601589 | 38.311832090 | 7  | 28.358287786 | 32.418506392 | 45.423075863 |
| 26 | 38.169527712 | 38.504501155 | 40.107002760 | 1  | 28.145636934 | 32.346693997 | 46.427104882 |
| 6  | 35.836865148 | 40.050765263 | 39.562928907 | 6  | 27.770435003 | 33.290559018 | 44.591581594 |
| 8  | 35.286531943 | 41.144734930 | 39.469453815 | 1  | 26.986504080 | 33.983932733 | 44.885135936 |
| 8  | 36.913578895 | 39.653467171 | 38.990893593 | 7  | 28.279504025 | 33.181029911 | 43.369481854 |
| 6  | 35.236654262 | 38.971074180 | 40.498513061 | 6  | 29.226513348 | 32.187307825 | 43.421994335 |
| 8  | 36.031263692 | 38.200081581 | 41.028832370 | 1  | 29.759782402 | 31.866918841 | 42.533342382 |
| 6  | 33.751715410 | 38.874253317 | 40.696378377 | 6  | 24.315341461 | 42.184938532 | 41.133067381 |
| 6  | 33.217920502 | 37.519407183 | 40.204155438 | 1  | 24.000384534 | 42.695840470 | 40.206135259 |
| 6  | 31.697223847 | 37.313483725 | 40.355533554 | 1  | 23.488129066 | 42.255472022 | 41.849684562 |
| 8  | 31.051112497 | 38.201673653 | 40.984879426 | 7  | 24.645254715 | 40.791041138 | 40.899989986 |
| 8  | 31.226373996 | 36.279755279 | 39.840234926 | 1  | 25.560083087 | 40.582167739 | 40.51543784  |
| 1  | 33.720311170 | 36.703575259 | 40.751306626 | 6  | 23.867963786 | 39.720770770 | 41.186855814 |
| 1  | 33.456153803 | 37.367091947 | 39.137810797 | 7  | 22.616602115 | 39.846908951 | 41.588123614 |
| 1  | 33.256515384 | 39.702939132 | 40.176627145 | 1  | 22.055723820 | 40.692515828 | 41.505811236 |
| 1  | 33.538500795 | 38.982738659 | 41.772152390 | 1  | 22.075030630 | 39.010286732 | 41.883248576 |
| 8  | 39.609560165 | 41.900749690 | 43.785672748 | 7  | 24.412223629 | 38.502343281 | 41.034391689 |
| 6  | 40.802739406 | 41.712762795 | 43.699825244 | 1  | 25.431784735 | 38.385245633 | 41.107700751 |
| 7  | 41.525610228 | 42.127610564 | 42.545090556 | 1  | 23.891820578 | 37.654739640 | 41.292383410 |
| 6  | 40.731044170 | 42.796112314 | 41.502112970 | 26 | 27.387107058 | 34.172622306 | 41.681483033 |
| 6  | 42.844868494 | 41.823873761 | 42.313363489 | 8  | 26.920203753 | 34.877353679 | 39.782708628 |
| 7  | 43.484515081 | 42.141601841 | 41.211922009 | 8  | 27.843479673 | 35.229795374 | 38.981560965 |
| 6  | 43.541766233 | 41.106362599 | 43.331287830 | 6  | 29.733449426 | 35.532693330 | 40.696963160 |
| 6  | 42.888301362 | 40.753987084 | 44.450687522 | 8  | 30.614459498 | 36.342005283 | 40.408407214 |
| 7  | 41.566805994 | 41.077574637 | 44.686763690 | 8  | 28.813113197 | 35.660652442 | 41.587082738 |
| 1  | 39.879705891 | 43.288799394 | 41.981405341 | 6  | 29.668253418 | 34.175637754 | 39.956092410 |
| 1  | 40.371423080 | 42.067625667 | 40.760457037 | 8  | 28.986123211 | 33.282813794 | 38.487717946 |
| 1  | 44.446108286 | 41.769953516 | 41.129430203 | 6  | 30.543227171 | 33.938822426 | 38.760538085 |
| 1  | 43.421546307 | 40.134478019 | 45.157532100 | 6  | 32.002366637 | 33.630007813 | 39.155933510 |
| 1  | 44.578968559 | 40.813645526 | 43.192844319 | 6  | 32.969821454 | 33.608486343 | 37.957814907 |
| 1  | 41.347946598 | 43.547350382 | 40.994344645 | 8  | 34.094504933 | 34.164197852 | 38.125373941 |
| 1  | 43.123357102 | 42.603565229 | 40.367845535 | 8  | 32.583439643 | 33.049529311 | 36.904259137 |
| 1  | 41.235687476 | 37.496418157 | 44.236351601 | 1  | 32.046790548 | 32.628020471 | 39.616494006 |
| 1  | 42.361715986 | 39.765213483 | 37.874036582 | 1  | 32.373626563 | 34.356364300 | 39.891532379 |
| 1  | 38.637879069 | 33.153074715 | 40.008047620 | 1  | 30.517407221 | 34.853211142 | 38.151872068 |
| 1  | 38.405136178 | 44.663881473 | 33.993106682 | 1  | 30.127859004 | 33.116162395 | 38.161753300 |
| 1  | 41.114086386 | 40.724686222 | 45.505596531 | 8  | 24.871652072 | 33.225768863 | 38.048252749 |

**Dioxygen Activation step reaction states cartesian coordinates for AlkBH2-dsDNA via "In-line" Fe(III)-superoxo Complex**

**RC1**

**QM/MM (BS1) = -3419.786229 a.u.**

**QM/MM (BS2+ZPE) = -3421.791578 a.u.**

|   |              |              |              |   |              |              |              |
|---|--------------|--------------|--------------|---|--------------|--------------|--------------|
| 6 | 24.763326076 | 30.785773224 | 41.867313615 | 1 | 24.107103091 | 36.444624319 | 37.169878472 |
| 7 | 25.935481433 | 30.226951132 | 41.405918013 | 1 | 22.775217450 | 37.368156419 | 38.684703450 |
| 1 | 26.137727347 | 29.221911565 | 41.310700166 | 1 | 20.860225153 | 32.429764786 | 39.728343767 |
| 6 | 26.795100616 | 31.218067882 | 41.131308343 | 1 | 20.319822827 | 34.838354395 | 39.783008481 |
| 1 | 27.806566988 | 31.074998410 | 40.767272036 | 1 | 25.381660484 | 35.345661807 | 37.797197558 |
| 7 | 26.244946701 | 32.399107966 | 41.393799409 | 1 | 21.241541950 | 37.141146486 | 39.459448952 |
| 6 | 24.967788735 | 32.146680438 | 41.855162922 | 1 | 23.944326158 | 30.185820878 | 42.264004466 |
|   |              |              |              | 1 | 23.887798936 | 36.328254300 | 44.483081075 |

|   |              |              |              |
|---|--------------|--------------|--------------|
| 1 | 29.842684596 | 30.874625307 | 45.141444355 |
| 1 | 25.182478824 | 42.699468266 | 41.547071324 |
| 1 | 23.015268866 | 31.747654137 | 38.871146359 |

**TS1**

**QM/MM (BS1) = -3419.772852 a.u.**

**QM/MM (BS2+ZPE) = -3421.775893 a.u.**

|    |              |              |              |
|----|--------------|--------------|--------------|
| 6  | 24.787971565 | 30.781619553 | 41.862134128 |
| 7  | 25.955283579 | 30.220051762 | 41.388026461 |
| 1  | 26.157264105 | 29.214152498 | 41.296970678 |
| 6  | 26.814534073 | 31.207903297 | 41.105745737 |
| 1  | 27.824836748 | 31.069153060 | 40.735298263 |
| 7  | 26.267681394 | 32.390981073 | 41.376845412 |
| 6  | 24.994789539 | 32.141618360 | 41.852252892 |
| 1  | 24.321226378 | 32.943608839 | 42.138150785 |
| 6  | 24.834532940 | 36.644675677 | 43.893292277 |
| 1  | 25.674990757 | 36.667910808 | 44.599896694 |
| 1  | 24.650246973 | 37.669904637 | 43.539793551 |
| 6  | 25.172138684 | 35.780463903 | 42.681288916 |
| 8  | 24.488274152 | 35.803072339 | 41.663688818 |
| 8  | 26.263879509 | 35.069577807 | 42.800020664 |
| 6  | 29.321222333 | 31.717790025 | 44.699920116 |
| 7  | 28.370620230 | 32.417397988 | 45.405524043 |
| 1  | 28.139091583 | 32.334567492 | 46.404818773 |
| 6  | 27.798537231 | 33.297658296 | 44.575269250 |
| 1  | 27.005286607 | 33.986035599 | 44.855465661 |
| 7  | 28.336772312 | 33.203642993 | 43.363876279 |
| 6  | 29.285210842 | 32.211115981 | 43.419749771 |
| 1  | 29.837553117 | 31.917659647 | 42.532875383 |
| 6  | 24.290330179 | 42.191898207 | 41.137915613 |
| 1  | 23.978731739 | 42.702954517 | 40.209723928 |
| 1  | 23.463532199 | 42.270551208 | 41.854330050 |
| 7  | 24.609341836 | 40.794968850 | 40.908095172 |
| 1  | 25.526495895 | 40.577044383 | 40.533597899 |
| 6  | 23.823209826 | 39.730551558 | 41.194297676 |
| 7  | 22.574906054 | 39.862411633 | 41.596459278 |
| 1  | 22.015338309 | 40.710023440 | 41.517771499 |
| 1  | 22.031948638 | 39.023341069 | 41.881858290 |
| 7  | 24.358804757 | 38.508904090 | 41.040295730 |
| 1  | 25.378684105 | 38.393033317 | 41.103274025 |
| 1  | 23.839197012 | 37.663445129 | 41.302405270 |
| 26 | 27.495954082 | 34.099859053 | 41.659150838 |
| 8  | 27.036495592 | 34.818197843 | 39.673133784 |
| 8  | 28.173023799 | 34.922156069 | 38.967827206 |
| 6  | 29.701025291 | 35.708486827 | 40.567998045 |
| 8  | 30.648596172 | 36.406902914 | 40.252949883 |
| 8  | 28.835740636 | 35.798877260 | 41.483235296 |
| 6  | 29.318002258 | 34.260823432 | 39.605270204 |
| 8  | 28.949443533 | 33.374096330 | 40.495528147 |
| 6  | 30.397648922 | 33.939660198 | 38.572659089 |
| 6  | 31.790021640 | 33.586376297 | 39.107693743 |
| 6  | 32.843847359 | 33.545450840 | 37.983087936 |
| 8  | 33.965660783 | 34.094175372 | 38.203039058 |
| 8  | 32.514665391 | 32.990863272 | 36.906597788 |
| 1  | 31.761643753 | 32.582233595 | 39.563164809 |
| 1  | 32.125460912 | 34.300103656 | 39.872498063 |
| 1  | 30.476342056 | 34.814250409 | 37.910120130 |
| 1  | 30.036447174 | 33.112143971 | 37.938311741 |
| 8  | 24.845994786 | 33.248117701 | 38.084765916 |
| 6  | 23.750393068 | 33.598781222 | 38.496072235 |
| 7  | 23.407023863 | 34.957738386 | 38.526894063 |

|   |              |              |              |
|---|--------------|--------------|--------------|
| 6 | 24.424661686 | 35.916725314 | 38.083289892 |
| 6 | 22.188728722 | 35.416001237 | 38.952073023 |
| 7 | 21.949190846 | 36.717171219 | 38.902003631 |
| 6 | 21.226732311 | 34.475679127 | 39.401746481 |
| 6 | 21.543046085 | 33.151910297 | 39.377209108 |
| 7 | 22.770263403 | 32.721049636 | 38.938064754 |
| 1 | 24.646008591 | 36.617767215 | 38.899853119 |
| 1 | 24.069838138 | 36.445700084 | 37.184892140 |
| 1 | 22.690818012 | 37.361920801 | 38.664246754 |
| 1 | 20.828157044 | 32.406941895 | 39.724752945 |
| 1 | 20.255193738 | 34.809070028 | 39.761260878 |
| 1 | 25.339212303 | 35.365782592 | 37.857191197 |
| 1 | 21.158771421 | 37.12992229  | 39.434581241 |
| 1 | 23.965852163 | 30.185790551 | 42.258586913 |
| 1 | 23.946982644 | 36.315549103 | 44.433660196 |
| 1 | 29.863399165 | 30.880089697 | 45.138519889 |
| 1 | 25.160899325 | 42.702056868 | 41.550122877 |
| 1 | 22.995687175 | 31.748490412 | 38.880748365 |

**IMI**

**QM/MM (BS1) = -3419.850338 a.u.**

**QM/MM (BS2+ZPE) = -3421.846925 a.u.**

|    |              |              |              |
|----|--------------|--------------|--------------|
| 6  | 24.597938474 | 30.621611704 | 41.853563754 |
| 7  | 25.783604223 | 30.071150370 | 41.423292172 |
| 1  | 26.012618738 | 29.071203631 | 41.358047041 |
| 6  | 26.624350781 | 31.070636571 | 41.120387553 |
| 1  | 27.646293180 | 30.930654282 | 40.785696019 |
| 7  | 26.047432283 | 32.248279374 | 41.326847618 |
| 6  | 24.775443177 | 31.985289791 | 41.792225559 |
| 1  | 24.080806855 | 32.779576793 | 42.050515001 |
| 6  | 24.766397125 | 36.705348854 | 43.918862111 |
| 1  | 25.587561881 | 36.764425430 | 44.646952765 |
| 1  | 24.548149393 | 37.719703735 | 43.551974047 |
| 6  | 25.163759237 | 35.819028377 | 42.737545574 |
| 8  | 24.602647358 | 35.970781304 | 41.638944194 |
| 8  | 26.105490631 | 34.979364130 | 42.963143186 |
| 6  | 29.295675084 | 31.674657973 | 44.669859170 |
| 7  | 28.376467702 | 32.407953180 | 45.380488525 |
| 1  | 28.156100007 | 32.344809035 | 46.382978135 |
| 6  | 27.794964512 | 33.273547244 | 44.534243038 |
| 1  | 27.006567004 | 33.970148655 | 44.808786174 |
| 7  | 28.291037755 | 33.138758872 | 43.309489971 |
| 6  | 29.223854545 | 32.132270365 | 43.375907812 |
| 1  | 29.743193383 | 31.790242402 | 42.486502633 |
| 6  | 24.104877980 | 42.226288500 | 41.217362115 |
| 1  | 23.769573807 | 42.738708992 | 40.297948348 |
| 1  | 23.300124699 | 42.316725850 | 41.960871909 |
| 7  | 24.436791010 | 40.835891741 | 40.975273028 |
| 1  | 25.426954961 | 40.598542965 | 40.876579767 |
| 6  | 23.648421358 | 39.758176225 | 41.176348534 |
| 7  | 22.385794785 | 39.836396247 | 41.536724787 |
| 1  | 21.847449529 | 40.696874258 | 41.619599453 |
| 1  | 21.853066428 | 38.973509347 | 41.761308876 |
| 7  | 24.219851691 | 38.556860048 | 40.944501995 |
| 1  | 25.239487401 | 38.569970721 | 40.897304936 |
| 1  | 23.861450598 | 37.667603505 | 41.332168972 |
| 26 | 27.231848179 | 33.955424849 | 41.620323579 |
| 8  | 27.999873161 | 35.402078954 | 40.428073309 |
| 8  | 28.913965750 | 35.014117126 | 39.391636496 |
| 6  | 29.187786321 | 36.779198101 | 41.763783669 |
| 8  | 30.273753198 | 36.482855724 | 41.432100412 |

|   |              |              |              |    |              |              |              |
|---|--------------|--------------|--------------|----|--------------|--------------|--------------|
| 8 | 28.262690392 | 37.259678332 | 42.292457379 | 1  | 23.226039915 | 42.335439510 | 41.936534555 |
| 6 | 29.379125162 | 33.774663007 | 39.504446502 | 7  | 24.342778756 | 40.895401009 | 40.870293120 |
| 8 | 29.000350956 | 33.011788480 | 40.384082418 | 1  | 25.330283030 | 40.690335723 | 40.696320051 |
| 6 | 30.427465245 | 33.476315261 | 38.462345657 | 6  | 23.627029924 | 39.795023254 | 41.189355267 |
| 6 | 31.848064314 | 33.789494036 | 38.961005132 | 7  | 22.403022637 | 39.839411912 | 41.671304092 |
| 6 | 32.923382531 | 33.678331618 | 37.864313426 | 1  | 21.812050027 | 40.669966288 | 41.684387528 |
| 8 | 34.066774146 | 34.145584302 | 38.132411225 | 1  | 21.909620982 | 38.961313696 | 41.922924947 |
| 8 | 32.589081365 | 33.140979750 | 36.781927851 | 7  | 24.231589710 | 38.609920963 | 40.961438662 |
| 1 | 32.138627260 | 33.104311539 | 39.774374509 | 1  | 25.244353815 | 38.653555024 | 40.850356219 |
| 1 | 31.900961041 | 34.797194147 | 39.402323332 | 1  | 23.910238200 | 37.710598246 | 41.359224413 |
| 1 | 30.214943709 | 34.067417149 | 37.560961679 | 26 | 27.219691818 | 33.941937999 | 41.602756662 |
| 1 | 30.348742393 | 32.417898124 | 38.179197183 | 8  | 27.775100288 | 35.303642016 | 40.549031734 |
| 8 | 24.980292050 | 33.172601175 | 38.184364842 | 8  | 29.058262019 | 34.880728835 | 39.452812265 |
| 6 | 23.883728489 | 33.552614762 | 38.570953975 | 6  | 28.979571547 | 36.934036470 | 41.918758036 |
| 7 | 23.608277126 | 34.922642340 | 38.675135544 | 8  | 30.065717370 | 36.571186737 | 41.693879957 |
| 6 | 24.712530574 | 35.845949693 | 38.388491950 | 8  | 27.987165113 | 37.424903641 | 42.284121673 |
| 6 | 22.389574767 | 35.418769501 | 39.057788857 | 6  | 29.418917195 | 33.660471441 | 39.643555924 |
| 7 | 22.224214867 | 36.729928645 | 39.125856165 | 8  | 28.889409682 | 32.910191809 | 40.490379199 |
| 6 | 21.340575149 | 34.503201006 | 39.334604122 | 6  | 30.563535697 | 33.189358817 | 38.761528059 |
| 6 | 21.599938524 | 33.170020531 | 39.265690824 | 6  | 31.861441841 | 33.976965199 | 39.452824806 |
| 7 | 22.841560221 | 32.703974970 | 38.910293653 | 6  | 32.934647878 | 33.749157447 | 37.893917273 |
| 1 | 25.042263432 | 36.312026291 | 39.327456895 | 8  | 34.095770873 | 34.185289868 | 38.144332880 |
| 1 | 24.384553003 | 36.592596926 | 37.650464358 | 8  | 32.582821860 | 33.191541736 | 36.826690076 |
| 1 | 23.026031574 | 37.349895094 | 39.126335329 | 1  | 32.315803518 | 33.768924604 | 39.959391455 |
| 1 | 20.830258867 | 32.442047858 | 39.517436449 | 1  | 31.629300254 | 35.054990131 | 38.987523898 |
| 1 | 20.361188449 | 34.866694991 | 39.641896885 | 1  | 30.254933401 | 33.303001525 | 37.711021863 |
| 1 | 25.543435404 | 35.268366505 | 37.976676621 | 1  | 30.713477954 | 32.115485778 | 38.945222664 |
| 1 | 21.368007713 | 37.114787659 | 39.570582096 | 8  | 24.992534397 | 33.139608651 | 38.165870754 |
| 1 | 23.797191340 | 30.020831138 | 42.284764470 | 6  | 23.906312134 | 33.531265862 | 38.568400112 |
| 1 | 23.884822579 | 36.350430446 | 44.452647240 | 7  | 23.651360144 | 34.903828956 | 38.694271996 |
| 1 | 29.842881154 | 30.844957127 | 45.117329108 | 6  | 24.766680367 | 35.817056732 | 38.415863241 |
| 1 | 24.998923159 | 42.721745379 | 41.595876341 | 6  | 22.438556953 | 35.411045477 | 39.080941537 |
| 1 | 23.029440730 | 31.723783148 | 38.847864449 | 7  | 22.285531905 | 36.723179540 | 39.155465495 |
|   |              |              |              | 6  | 21.379463538 | 34.506117503 | 39.356714063 |
|   |              |              |              | 6  | 21.621908550 | 33.170626355 | 39.276413971 |
|   |              |              |              | 7  | 22.855987070 | 32.693026843 | 38.910115723 |
|   |              |              |              | 1  | 25.062983076 | 36.313035120 | 39.350131580 |
|   |              |              |              | 1  | 24.467570753 | 36.538761031 | 37.641031927 |
|   |              |              |              | 1  | 23.091600467 | 37.337106229 | 39.148670970 |
|   |              |              |              | 1  | 20.844632358 | 32.449672228 | 39.525557817 |
|   |              |              |              | 1  | 20.405846241 | 34.880340170 | 39.669535887 |
|   |              |              |              | 1  | 25.613728674 | 35.225476832 | 38.060708486 |
|   |              |              |              | 1  | 21.433198196 | 37.111460468 | 39.605034900 |
|   |              |              |              | 1  | 23.771439585 | 30.032241993 | 42.291838549 |
|   |              |              |              | 1  | 23.895929898 | 36.335329495 | 44.475139839 |
|   |              |              |              | 1  | 29.828959521 | 30.889430549 | 45.111762348 |
|   |              |              |              | 1  | 24.921516249 | 42.753105603 | 41.560436267 |
|   |              |              |              | 1  | 23.032429946 | 31.711303698 | 38.838981590 |

## TS2

QM/MM (BS1) = -3419.840647 a.u.

QM/MM (BS2+ZPE) = -3421.852688 a.u.

|   |              |              |              |
|---|--------------|--------------|--------------|
| 6 | 24.564900806 | 30.637996376 | 41.854176313 |
| 7 | 25.744958292 | 30.089242511 | 41.403834473 |
| 1 | 25.973763988 | 29.089053102 | 41.337804328 |
| 6 | 26.578543838 | 31.087324964 | 41.084767865 |
| 1 | 27.595065885 | 30.955236502 | 40.732448077 |
| 7 | 26.002435240 | 32.265371720 | 41.303335135 |
| 6 | 24.737996944 | 32.001382817 | 41.791220673 |
| 1 | 24.047837451 | 32.794688285 | 42.061863239 |
| 6 | 24.788451603 | 36.669273010 | 43.946032992 |
| 1 | 25.611561979 | 36.689143288 | 44.674023874 |
| 1 | 24.606179505 | 37.695569728 | 43.593707722 |
| 6 | 25.148220285 | 35.794516601 | 42.744446744 |
| 8 | 24.600858019 | 36.004832151 | 41.651834851 |
| 8 | 26.043714595 | 34.895119943 | 42.949000787 |
| 6 | 29.268519634 | 31.718721102 | 44.680193541 |
| 7 | 28.331087498 | 32.421148743 | 45.399598692 |
| 1 | 28.113063640 | 32.342610796 | 46.401665046 |
| 6 | 27.729992013 | 33.283952208 | 44.566715174 |
| 1 | 26.925296941 | 33.957484057 | 44.849654708 |
| 7 | 28.233640434 | 33.178073821 | 43.341467591 |
| 6 | 29.191214839 | 32.191777981 | 43.393501108 |
| 1 | 29.717708466 | 31.877857930 | 42.497807542 |
| 6 | 24.018882168 | 42.276393341 | 41.178252472 |
| 1 | 23.667484038 | 42.823661858 | 40.286096180 |

## IM2

QM/MM (BS1) = -3419.849387a.u.

QM/MM (BS2+ZPE) = -3421.854806 a.u.

|   |              |              |              |
|---|--------------|--------------|--------------|
| 6 | 24.599400903 | 30.651292426 | 41.839371569 |
| 7 | 25.774969596 | 30.107069217 | 41.368999047 |
| 1 | 26.007463493 | 29.107207342 | 41.302185656 |
| 6 | 26.599368662 | 31.107425619 | 41.035350807 |
| 1 | 27.611183513 | 30.989497532 | 40.665013142 |
| 7 | 26.019918452 | 32.282253675 | 41.267781743 |
| 6 | 24.764568987 | 32.014518976 | 41.777143817 |
| 1 | 24.075170027 | 32.805526603 | 42.055589303 |
| 6 | 24.780396112 | 36.619820814 | 43.933332489 |

|    |              |              |              |
|----|--------------|--------------|--------------|
| 1  | 25.616883454 | 36.617751419 | 44.645839037 |
| 1  | 24.618524750 | 37.650443773 | 43.584628495 |
| 6  | 25.084008648 | 35.740379551 | 42.720474808 |
| 8  | 24.498338436 | 35.943130777 | 41.653102559 |
| 8  | 25.984817416 | 34.827252706 | 42.896657002 |
| 6  | 29.246436644 | 31.759082392 | 44.633640914 |
| 7  | 28.289175125 | 32.439612553 | 45.348375382 |
| 1  | 28.065967119 | 32.347903357 | 46.348364101 |
| 6  | 27.682672803 | 33.299763294 | 44.520024479 |
| 1  | 26.863100808 | 33.954403436 | 44.802115567 |
| 7  | 28.203709465 | 33.215732704 | 43.298894916 |
| 6  | 29.180012601 | 32.245972622 | 43.351003524 |
| 1  | 29.724608721 | 31.959667007 | 42.456863707 |
| 6  | 24.009092050 | 42.264730957 | 41.177959800 |
| 1  | 23.660491182 | 42.806288435 | 40.281205185 |
| 1  | 23.216391517 | 42.332981868 | 41.935598584 |
| 7  | 24.326358471 | 40.879625553 | 40.881679782 |
| 1  | 25.312180421 | 40.665886178 | 40.705447512 |
| 6  | 23.600117022 | 39.788421832 | 41.204891598 |
| 7  | 22.374102640 | 39.846179528 | 41.680431923 |
| 1  | 21.786903042 | 40.679337012 | 41.680469717 |
| 1  | 21.875729905 | 38.971643331 | 41.933174444 |
| 7  | 24.192113691 | 38.594421377 | 40.992578267 |
| 1  | 25.205857123 | 38.615766477 | 40.885462187 |
| 1  | 23.832471799 | 37.704453143 | 41.370488072 |
| 26 | 27.202810762 | 33.976116812 | 41.542940011 |
| 8  | 27.481617406 | 35.430095916 | 40.562338283 |
| 8  | 29.038125570 | 34.868939639 | 39.218112387 |
| 6  | 28.893662415 | 36.936694199 | 41.907481893 |
| 8  | 29.944012265 | 36.521446457 | 41.622465307 |
| 8  | 27.940443672 | 37.459915325 | 42.331509205 |
| 6  | 29.382413602 | 33.723915983 | 39.581033352 |
| 8  | 28.807947713 | 33.053772546 | 40.507484002 |
| 6  | 30.585680982 | 33.107398278 | 38.867793661 |
| 6  | 31.849156319 | 33.970335275 | 38.984470249 |
| 6  | 32.974581149 | 33.590733928 | 38.004881239 |
| 8  | 34.160997208 | 33.732416295 | 38.411060931 |
| 8  | 32.633934397 | 33.216937519 | 36.851893471 |
| 1  | 32.255784557 | 33.971948461 | 40.007844374 |
| 1  | 31.572294508 | 35.014542542 | 38.758839987 |
| 1  | 30.331873063 | 33.020295290 | 37.799650056 |
| 1  | 30.753697362 | 32.090237890 | 39.254051105 |
| 8  | 24.986484155 | 33.184917072 | 38.201778499 |
| 6  | 23.890245328 | 33.567851389 | 38.583372373 |
| 7  | 23.617945358 | 34.938193187 | 38.694024749 |
| 6  | 24.723593385 | 35.863248169 | 38.416751703 |
| 6  | 22.394621525 | 35.433761675 | 39.060095858 |
| 7  | 22.223520174 | 36.745385865 | 39.111921563 |
| 6  | 21.344965256 | 34.519392380 | 39.339709555 |
| 6  | 21.603211776 | 33.186080934 | 39.271400673 |
| 7  | 22.845088151 | 32.719927235 | 38.918374010 |
| 1  | 24.957361371 | 36.427123978 | 39.328552716 |
| 1  | 24.450161372 | 36.525701534 | 37.581320450 |
| 1  | 23.023364256 | 37.366462115 | 39.088945988 |
| 1  | 20.832544558 | 32.457812329 | 39.519065257 |
| 1  | 20.364131775 | 34.884903472 | 39.639778922 |
| 1  | 25.607470746 | 35.276588232 | 38.155785683 |
| 1  | 21.373664851 | 37.129885462 | 39.569636837 |
| 1  | 23.804215718 | 30.046835453 | 42.275696695 |
| 1  | 23.887677649 | 36.303850862 | 44.473039868 |
| 1  | 29.811157618 | 30.937340918 | 45.073979982 |
| 1  | 24.912967512 | 42.742180273 | 41.556270023 |

|   |              |              |              |
|---|--------------|--------------|--------------|
| 1 | 23.030836821 | 31.739836221 | 38.848434579 |
|---|--------------|--------------|--------------|

**IM3**

**QM/MM (BS1) = -3419.876731 a.u.**

**QM/MM (BS2+ZPE) = -3421.892680 a.u.**

|    |              |              |              |
|----|--------------|--------------|--------------|
| 6  | 24.623812045 | 30.602038782 | 41.857291781 |
| 7  | 25.806238410 | 30.051937531 | 41.420096090 |
| 1  | 26.025383361 | 29.051496631 | 41.329635382 |
| 6  | 26.668420144 | 31.048154460 | 41.169227417 |
| 1  | 27.689827708 | 30.909484366 | 40.831164289 |
| 7  | 26.101392661 | 32.218710034 | 41.422140153 |
| 6  | 24.819545566 | 31.964449320 | 41.852142405 |
| 1  | 24.134639961 | 32.758184358 | 42.133759879 |
| 6  | 25.032758154 | 36.780239701 | 44.100208815 |
| 1  | 25.777987779 | 36.676958447 | 44.904288745 |
| 1  | 24.891586761 | 37.851425816 | 43.904214003 |
| 6  | 25.585883055 | 36.161595021 | 42.814203895 |
| 8  | 25.538009040 | 36.822558503 | 41.771732482 |
| 8  | 26.167607854 | 35.013325223 | 42.921934127 |
| 6  | 29.197852601 | 31.747192314 | 44.617764898 |
| 7  | 28.233390630 | 32.406951743 | 45.340977950 |
| 1  | 28.036925417 | 32.322593910 | 46.346825370 |
| 6  | 27.591719384 | 33.243980852 | 44.514299998 |
| 1  | 26.770685441 | 33.890737206 | 44.808026493 |
| 7  | 28.095000535 | 33.162983236 | 43.287666939 |
| 6  | 29.099348722 | 32.223886382 | 43.332424444 |
| 1  | 29.657666703 | 31.961497675 | 42.438909384 |
| 6  | 24.352215886 | 42.151597216 | 41.107164673 |
| 1  | 24.409865985 | 42.423509051 | 40.036581302 |
| 1  | 23.410447862 | 42.561984428 | 41.501111682 |
| 7  | 24.407234096 | 40.720194936 | 41.326972827 |
| 1  | 25.322019996 | 40.281527999 | 41.491587973 |
| 6  | 23.353111703 | 39.894118568 | 41.202391807 |
| 7  | 22.149446916 | 40.351543161 | 40.858775868 |
| 1  | 21.865674669 | 41.309923900 | 41.024942261 |
| 1  | 21.365092550 | 39.675688588 | 40.878144819 |
| 7  | 23.490317601 | 38.572950391 | 41.357406260 |
| 1  | 24.393359280 | 38.122193289 | 41.573745450 |
| 1  | 22.643804350 | 38.092823433 | 41.719354598 |
| 26 | 27.171634713 | 33.994148733 | 41.558242483 |
| 8  | 26.506168128 | 34.673643743 | 40.263684867 |
| 8  | 29.354987742 | 35.440406130 | 39.569728343 |
| 6  | 29.641592971 | 36.531278417 | 41.994913188 |
| 8  | 30.787215751 | 36.304736123 | 41.991197755 |
| 8  | 28.517638767 | 36.792879074 | 42.103090829 |
| 6  | 29.505964853 | 34.234996312 | 39.768997058 |
| 8  | 28.875096019 | 33.567609094 | 40.697598527 |
| 6  | 30.543463369 | 33.453984171 | 38.959315454 |
| 6  | 31.921575448 | 34.120998753 | 39.053890837 |
| 6  | 32.990470786 | 33.654107614 | 38.049921573 |
| 8  | 34.191768585 | 33.784868333 | 38.420827066 |
| 8  | 32.614265630 | 33.241176382 | 36.921880829 |
| 1  | 32.344837182 | 34.039499906 | 40.067732866 |
| 1  | 31.777896141 | 35.201148046 | 38.877999643 |
| 1  | 30.224761466 | 33.460667061 | 37.903458503 |
| 1  | 30.572793754 | 32.403248270 | 39.285080709 |
| 8  | 24.829274378 | 33.299620241 | 38.176328005 |
| 6  | 23.731894826 | 33.637156220 | 38.582963880 |
| 7  | 23.404395752 | 34.996614181 | 38.719371138 |

|   |              |              |              |
|---|--------------|--------------|--------------|
| 6 | 24.463258493 | 35.973627569 | 38.426996331 |
| 6 | 22.157093300 | 35.436791130 | 39.077197962 |
| 7 | 21.946002812 | 36.744599746 | 39.139730023 |
| 6 | 21.148490634 | 34.477161723 | 39.345724179 |
| 6 | 21.470879649 | 33.154984669 | 39.288785813 |
| 7 | 22.728503666 | 32.742798932 | 38.937839779 |
| 1 | 24.680723392 | 36.564824053 | 39.328435111 |
| 1 | 24.151413605 | 36.612381704 | 37.586340580 |
| 1 | 22.732504564 | 37.384082241 | 39.144434541 |
| 1 | 20.736533004 | 32.394479771 | 39.547594499 |
| 1 | 20.148909927 | 34.790993947 | 39.641268767 |
| 1 | 25.371056317 | 35.423553920 | 38.170652950 |
| 1 | 21.101528122 | 37.137176170 | 39.590218340 |
| 1 | 23.815072117 | 30.006177024 | 42.280323482 |
| 1 | 24.098740095 | 36.395645456 | 44.509799896 |
| 1 | 29.782771719 | 30.940212630 | 45.059036630 |
| 1 | 25.171998003 | 42.642639132 | 41.631476074 |
| 1 | 22.962992038 | 31.772429153 | 38.879786405 |

**Substrate hydroxylation step reaction states cartesian coordinates for AlkBH2-dsDNA**

**Snapshot 1**

**RC2**

**QM/MM (BS1) = -3309.777979 a.u.**

**QM/MM (BS2+ZPE) = -3311.663829 a.u.**

|    |              |              |              |
|----|--------------|--------------|--------------|
| 6  | 24.526979716 | 36.782905040 | 44.666764018 |
| 7  | 25.711314055 | 36.185705437 | 45.033308847 |
| 1  | 25.888946115 | 35.670164403 | 45.907803361 |
| 6  | 26.621915804 | 36.448315960 | 44.077811118 |
| 1  | 27.649418977 | 36.095040176 | 44.113177785 |
| 7  | 26.089352609 | 37.187368679 | 43.112339235 |
| 6  | 24.777153409 | 37.410224036 | 43.465585829 |
| 1  | 24.126735503 | 38.040545060 | 42.862806232 |
| 6  | 25.126171798 | 41.663270377 | 40.230351723 |
| 1  | 25.728389165 | 42.539451050 | 40.521688214 |
| 1  | 25.086340198 | 41.683323014 | 39.131028523 |
| 6  | 25.908338392 | 40.417255677 | 40.637403885 |
| 8  | 25.503237809 | 39.618236105 | 41.540792625 |
| 8  | 27.014103356 | 40.204566561 | 40.080211516 |
| 6  | 28.855036481 | 39.935627750 | 45.058633519 |
| 7  | 27.844882146 | 40.830825578 | 44.805324529 |
| 1  | 27.551675441 | 41.629162109 | 45.382825388 |
| 6  | 27.272108439 | 40.497737530 | 43.640311092 |
| 1  | 26.415329789 | 41.015156646 | 43.223026578 |
| 7  | 27.865310785 | 39.434805930 | 43.113279191 |
| 6  | 28.862568531 | 39.067435139 | 43.991108379 |
| 1  | 29.494880002 | 38.207173091 | 43.789164011 |
| 6  | 24.424833235 | 43.058298664 | 34.911541255 |
| 1  | 23.489165386 | 43.231533330 | 34.353179520 |
| 1  | 24.436385915 | 43.765564066 | 35.758545804 |
| 7  | 24.542434903 | 41.690551163 | 35.385608344 |
| 1  | 25.275806354 | 41.084205244 | 35.002789769 |
| 6  | 23.765899533 | 41.183423560 | 36.356058759 |
| 7  | 22.716251144 | 41.869790963 | 36.808736129 |
| 1  | 22.349185858 | 42.717846158 | 36.362323239 |
| 1  | 22.219017457 | 41.499769699 | 37.627534478 |
| 7  | 24.052968068 | 39.985013709 | 36.885472238 |
| 1  | 24.988427108 | 39.586455186 | 36.791415724 |
| 1  | 23.321594028 | 39.473471324 | 37.399209699 |
| 26 | 27.092567525 | 38.257238191 | 41.512603829 |

|   |              |              |              |
|---|--------------|--------------|--------------|
| 8 | 26.463283795 | 37.363101363 | 40.329923889 |
| 8 | 29.538342314 | 38.359424244 | 39.558478855 |
| 6 | 29.711168105 | 37.576131709 | 40.488837013 |
| 8 | 28.874811406 | 37.431122145 | 41.478940425 |
| 6 | 31.014801508 | 36.771658209 | 40.566734401 |
| 6 | 30.989247830 | 35.369723020 | 41.176512606 |
| 6 | 32.365986021 | 34.665110225 | 41.207090658 |
| 8 | 32.361168317 | 33.407287687 | 41.192437713 |
| 8 | 33.404630561 | 35.378815624 | 41.267620222 |
| 1 | 30.287853671 | 34.710613833 | 40.643342021 |
| 1 | 30.617075391 | 35.416441455 | 42.216251796 |
| 1 | 31.723699760 | 37.393192657 | 41.141702278 |
| 1 | 31.413770959 | 36.739019567 | 39.54573697  |
| 8 | 23.451389915 | 33.311773734 | 42.187055389 |
| 6 | 22.608664800 | 34.162492271 | 42.365850633 |
| 7 | 22.441531119 | 35.233260342 | 41.452873276 |
| 6 | 23.366750686 | 35.270305628 | 40.307788510 |
| 6 | 21.488273446 | 36.200182123 | 41.602191961 |
| 7 | 21.405773331 | 37.194171644 | 40.726002709 |
| 6 | 20.579644120 | 36.110094507 | 42.697988591 |
| 6 | 20.727478209 | 35.101960962 | 43.598765159 |
| 7 | 21.742735099 | 34.187784203 | 43.465454217 |
| 1 | 23.896998503 | 34.313506917 | 40.278025428 |
| 1 | 24.097885733 | 36.086449232 | 40.428454105 |
| 1 | 20.736098882 | 37.953170647 | 40.888844048 |
| 1 | 20.046421364 | 34.999985003 | 44.449793800 |
| 1 | 19.771483594 | 36.832597234 | 42.800226397 |
| 1 | 22.800907904 | 35.392571878 | 39.373729043 |
| 1 | 21.999731665 | 37.286353363 | 39.906646972 |
| 8 | 27.112043037 | 39.689189551 | 37.270211256 |
| 1 | 28.036895672 | 39.376753783 | 37.195006967 |
| 1 | 27.053739187 | 39.939291821 | 38.216799312 |
| 1 | 23.667809963 | 36.855312866 | 45.333586154 |
| 1 | 24.121789146 | 41.803954440 | 40.629714712 |
| 1 | 29.396231933 | 39.959311554 | 46.004473826 |
| 1 | 25.265334090 | 43.308305688 | 34.264144840 |
| 1 | 21.887207241 | 33.495073176 | 44.172031694 |

**TS7**

**QM/MM (BS1) = -3309.739955 a.u.**

**QM/MM (BS2+ZPE) = -3311.629373 a.u.**

|   |              |              |              |
|---|--------------|--------------|--------------|
| 6 | 24.375061929 | 36.710689454 | 44.851814148 |
| 7 | 25.567182460 | 36.131664550 | 45.220133245 |
| 1 | 25.770178885 | 35.645108035 | 46.104034170 |
| 6 | 26.462038863 | 36.361045355 | 44.243758982 |
| 1 | 27.489875661 | 36.009090779 | 44.278165531 |
| 7 | 25.910805908 | 37.059051679 | 43.261143189 |
| 6 | 24.604742429 | 37.292998078 | 43.626257266 |
| 1 | 23.947541301 | 37.909231165 | 43.016937626 |
| 6 | 25.004673850 | 41.450203661 | 40.253148388 |
| 1 | 25.694561621 | 42.248741909 | 40.573578103 |
| 1 | 24.974925151 | 41.493266132 | 39.155169055 |
| 6 | 25.613602397 | 40.112452185 | 40.662620906 |
| 8 | 25.212595931 | 39.456240852 | 41.662995834 |
| 8 | 26.607027259 | 39.666364522 | 40.013368423 |
| 6 | 28.766898814 | 39.806310901 | 44.959635176 |
| 7 | 27.752192343 | 40.695875431 | 44.709819128 |
| 1 | 27.468767157 | 41.501304519 | 45.282314736 |
| 6 | 27.154939594 | 40.333236750 | 43.563255275 |
| 1 | 26.283830084 | 40.839138619 | 43.161995661 |
| 7 | 27.731129173 | 39.259068478 | 43.042181439 |

|    |              |              |              |    |              |              |              |
|----|--------------|--------------|--------------|----|--------------|--------------|--------------|
| 6  | 28.747115941 | 38.914953414 | 43.907153223 | 7  | 26.096321968 | 37.146544782 | 43.102986783 |
| 1  | 29.377864852 | 38.048754679 | 43.719254585 | 6  | 24.782452188 | 37.359211604 | 43.460809851 |
| 6  | 24.417850979 | 43.091246415 | 34.894524422 | 1  | 24.120426155 | 37.968140346 | 42.849141272 |
| 1  | 23.480415377 | 43.265744555 | 34.339522424 | 6  | 25.069308168 | 41.583851381 | 40.228555536 |
| 1  | 24.430858494 | 43.793177598 | 35.745712039 | 1  | 25.705020333 | 42.434394237 | 40.526718573 |
| 7  | 24.540036360 | 41.720787890 | 35.357960399 | 1  | 25.045166842 | 41.596783351 | 39.129124575 |
| 1  | 25.267311673 | 41.113144509 | 34.965565822 | 6  | 25.765021122 | 40.305053341 | 40.675626088 |
| 6  | 23.763134381 | 41.205047108 | 36.322809532 | 8  | 25.379086920 | 39.608440050 | 41.650132218 |
| 7  | 22.716665723 | 41.888306875 | 36.786625775 | 8  | 26.826129172 | 39.948614115 | 40.067637683 |
| 1  | 22.350709291 | 42.742684097 | 36.351683400 | 6  | 28.874690341 | 39.933009053 | 45.055919707 |
| 1  | 22.221261587 | 41.511598610 | 37.603320476 | 7  | 27.872517602 | 40.836049118 | 44.800154780 |
| 7  | 24.047734240 | 39.998763898 | 36.834436400 | 1  | 27.573625248 | 41.628399654 | 45.382176076 |
| 1  | 24.978191222 | 39.594300752 | 36.721954982 | 6  | 27.313249821 | 40.514120429 | 39.629124575 |
| 1  | 23.313638573 | 39.481346058 | 37.338004196 | 1  | 26.460984483 | 41.041388312 | 43.207196273 |
| 26 | 26.733713986 | 37.924275034 | 41.450277778 | 7  | 27.903496067 | 39.453804822 | 43.090090385 |
| 8  | 25.696499187 | 36.884526170 | 40.508925264 | 6  | 28.887119741 | 39.075711747 | 43.977690058 |
| 8  | 29.394156399 | 38.331334631 | 39.561424430 | 1  | 29.516447118 | 38.212004733 | 43.778138439 |
| 6  | 29.484870376 | 37.442333686 | 40.407515154 | 6  | 24.411537079 | 42.999332920 | 34.906026958 |
| 8  | 28.530210071 | 37.119794422 | 41.232606654 | 1  | 23.486199866 | 43.213400627 | 34.344850419 |
| 6  | 30.823673290 | 36.693497586 | 40.542852315 | 1  | 24.436519754 | 43.686456385 | 36.769065737 |
| 6  | 30.855259023 | 35.294570606 | 41.159709101 | 7  | 24.484164249 | 41.618966943 | 35.352439361 |
| 6  | 32.252726982 | 34.626223402 | 41.179722341 | 1  | 25.209175657 | 41.001849971 | 34.970912338 |
| 8  | 32.278001419 | 33.368240571 | 41.154404041 | 6  | 23.707489674 | 41.129179907 | 36.331468935 |
| 8  | 33.276935381 | 35.360146410 | 41.244087440 | 7  | 22.679776681 | 41.839982843 | 36.795186530 |
| 1  | 30.167653842 | 34.610579658 | 40.640796652 | 1  | 22.328082582 | 42.696278623 | 36.352098450 |
| 1  | 30.492771089 | 35.333053662 | 42.203551632 | 1  | 22.181416757 | 41.482352428 | 37.618712104 |
| 1  | 31.485555985 | 37.359425539 | 41.125740160 | 7  | 23.972364805 | 39.922795006 | 36.854867357 |
| 1  | 31.259543752 | 36.676659505 | 39.532316030 | 1  | 24.897289165 | 39.506213071 | 36.747317013 |
| 8  | 23.672748822 | 33.354607203 | 42.218060725 | 1  | 23.249617170 | 39.433661076 | 37.400213098 |
| 6  | 22.840395381 | 34.218417401 | 42.359382711 | 26 | 27.038423533 | 38.187985785 | 41.400858962 |
| 7  | 22.745050542 | 35.297885018 | 41.424088018 | 8  | 26.200480752 | 37.074713839 | 40.188185255 |
| 6  | 23.715756163 | 35.307113366 | 40.361721398 | 8  | 29.523501723 | 38.360119080 | 39.617579492 |
| 6  | 21.765913465 | 36.260797964 | 41.510986627 | 6  | 29.699708328 | 37.516773230 | 40.500756884 |
| 7  | 21.716323799 | 37.244768213 | 40.625411078 | 8  | 28.844830044 | 37.290339105 | 41.452721772 |
| 6  | 20.800956672 | 36.171013958 | 42.555317150 | 6  | 31.013751043 | 36.730999975 | 40.539572347 |
| 6  | 20.897555481 | 35.172352601 | 43.474268257 | 6  | 31.005812189 | 35.329441228 | 41.147683865 |
| 7  | 21.916429075 | 34.255510958 | 43.407596295 | 6  | 32.385176068 | 34.635611324 | 41.180030190 |
| 1  | 24.240318960 | 34.347990890 | 40.328881388 | 8  | 32.387731433 | 33.377499220 | 41.154069331 |
| 1  | 24.694872856 | 36.165523099 | 40.531343884 | 8  | 33.419048556 | 35.354831729 | 41.253512811 |
| 1  | 21.002121874 | 37.972570994 | 40.735132625 | 1  | 30.308736825 | 34.663914359 | 40.616531584 |
| 1  | 20.170957245 | 35.082417483 | 44.288612643 | 1  | 30.632704810 | 35.376404534 | 42.186926899 |
| 1  | 19.993232939 | 36.900538296 | 42.614032604 | 1  | 31.727901734 | 37.357160317 | 41.103043933 |
| 1  | 23.271211523 | 35.582115696 | 39.395898723 | 1  | 31.396418475 | 36.707348954 | 39.508689853 |
| 1  | 22.377557728 | 37.369627362 | 39.864899322 | 8  | 23.414892221 | 33.305354845 | 42.135888600 |
| 8  | 27.048507169 | 39.637045753 | 37.239292302 | 6  | 22.587978706 | 34.162607442 | 42.340318895 |
| 1  | 27.995705652 | 39.397655126 | 37.183968525 | 7  | 22.458983914 | 35.270303654 | 41.425729689 |
| 1  | 26.889187785 | 39.693083597 | 38.207439775 | 6  | 23.372518268 | 35.292024480 | 40.383305681 |
| 1  | 23.529220283 | 36.822653104 | 45.530108603 | 6  | 21.488836469 | 36.244157123 | 41.578876147 |
| 1  | 24.021304260 | 41.682056254 | 40.662166666 | 7  | 21.384652502 | 37.223448661 | 40.687476880 |
| 1  | 29.335049539 | 39.870787487 | 45.887597913 | 6  | 20.608545035 | 36.157763127 | 42.691364218 |
| 1  | 25.255587862 | 43.346065528 | 34.245423924 | 6  | 20.740828817 | 35.142379864 | 43.588421146 |
| 1  | 22.014304175 | 33.567170375 | 44.126331433 | 7  | 21.732123942 | 34.201311667 | 43.436182741 |

**IM10**

**QM/MM (BS1) = -3309.767645 a.u.**

**QM/MM (BS2+ZPE) = -3311.653160 a.u.**

|   |              |              |              |   |              |              |              |
|---|--------------|--------------|--------------|---|--------------|--------------|--------------|
| 6 | 24.548571841 | 36.763564511 | 44.680134977 | 1 | 26.223383035 | 36.133522068 | 40.415079949 |
| 7 | 25.744888113 | 36.194936887 | 45.056242225 | 1 | 20.718722887 | 37.982978000 | 40.863184767 |
| 1 | 25.934376384 | 35.702075580 | 45.941019298 | 1 | 20.063659054 | 35.048044156 | 44.443060030 |
| 6 | 26.645473383 | 36.445378270 | 44.088321589 | 1 | 19.806702695 | 36.886141679 | 42.801854369 |
| 1 | 27.679623086 | 36.112236939 | 44.128350366 | 1 | 23.583157013 | 36.227026211 | 39.870658474 |
|   |              |              |              | 1 | 21.877152248 | 37.261508952 | 39.797333002 |
|   |              |              |              | 8 | 27.065763327 | 39.652539163 | 37.243142924 |
|   |              |              |              | 1 | 28.010883541 | 39.403080029 | 37.185704967 |
|   |              |              |              | 1 | 26.938033237 | 39.788575949 | 38.205888407 |

|   |              |              |              |
|---|--------------|--------------|--------------|
| 1 | 23.688750973 | 36.838227278 | 45.345868305 |
| 1 | 24.069525251 | 41.763880794 | 40.623638874 |
| 1 | 29.410947431 | 39.952274735 | 46.004668616 |
| 1 | 25.266241883 | 43.237947900 | 34.273089433 |
| 1 | 21.876499667 | 33.508524941 | 44.142705707 |

**TS8**

**QM/MM (BS1) = -3309.753653 a.u.**

**QM/MM (BS2+ZPE) = -3311.643711 a.u.**

|    |              |              |              |
|----|--------------|--------------|--------------|
| 6  | 24.353001672 | 36.700556752 | 44.869996779 |
| 7  | 25.551282515 | 36.130900788 | 45.234322106 |
| 1  | 25.765771723 | 35.656392931 | 46.122035706 |
| 6  | 26.434192371 | 36.348846285 | 44.245674328 |
| 1  | 27.465310317 | 36.006243636 | 44.276500797 |
| 7  | 25.870398066 | 37.029227149 | 43.256850059 |
| 6  | 24.567707430 | 37.266060898 | 43.634710222 |
| 1  | 23.901058674 | 37.870943874 | 43.024142808 |
| 6  | 24.976190869 | 41.424645940 | 40.233062772 |
| 1  | 25.674707404 | 42.216751578 | 40.550745882 |
| 1  | 24.932662463 | 41.479453600 | 39.135928609 |
| 6  | 25.587292736 | 40.080255348 | 40.615442738 |
| 8  | 25.183067645 | 39.402139210 | 41.607186907 |
| 8  | 26.576893509 | 39.653815459 | 39.957421339 |
| 6  | 28.761138027 | 39.812602972 | 44.953538917 |
| 7  | 27.744044151 | 40.697328208 | 44.696892349 |
| 1  | 27.449730973 | 41.497221054 | 45.271604781 |
| 6  | 27.165427634 | 40.337610575 | 43.538047514 |
| 1  | 26.297148264 | 40.841860437 | 43.126922312 |
| 7  | 27.754178594 | 39.271194860 | 43.016902075 |
| 6  | 28.758824871 | 38.927955240 | 43.894786372 |
| 1  | 29.397224040 | 38.065862334 | 43.712899351 |
| 6  | 24.421679486 | 43.062384823 | 34.895618872 |
| 1  | 23.489572985 | 43.263649743 | 34.340742865 |
| 1  | 24.444939441 | 43.750036725 | 35.758121600 |
| 7  | 24.517649299 | 41.682841262 | 35.337447383 |
| 1  | 25.240812328 | 41.072055610 | 34.942539516 |
| 6  | 23.742639987 | 41.171362949 | 36.306139951 |
| 7  | 22.707671763 | 41.864639116 | 36.780541481 |
| 1  | 22.345531604 | 42.721873318 | 36.347933370 |
| 1  | 22.213728490 | 41.491202510 | 37.599805569 |
| 7  | 24.018228169 | 39.959488511 | 36.808578852 |
| 1  | 24.946462437 | 39.550873503 | 36.695096770 |
| 1  | 23.287467154 | 39.451153284 | 37.325965297 |
| 26 | 26.671858050 | 37.884039693 | 41.463025933 |
| 8  | 25.503003060 | 36.739572171 | 40.353628251 |
| 8  | 29.331248797 | 38.251929622 | 39.564106432 |
| 6  | 29.418610902 | 37.355040782 | 40.402708060 |
| 8  | 28.445111897 | 36.999484630 | 41.194756637 |
| 6  | 30.772674775 | 36.639021169 | 40.557770768 |
| 6  | 30.828102594 | 35.235691414 | 41.161164968 |
| 6  | 32.236061015 | 34.590577118 | 41.175245401 |
| 8  | 32.278033757 | 33.333127665 | 41.134935424 |
| 8  | 33.249652669 | 35.337408219 | 41.248327742 |
| 1  | 30.154622175 | 34.543859303 | 40.633685341 |
| 1  | 30.463099094 | 35.257221403 | 42.204573463 |
| 1  | 31.407766951 | 37.315794367 | 41.158213895 |
| 1  | 31.230360823 | 36.642881232 | 39.556547236 |
| 8  | 23.699415815 | 33.401134372 | 42.213997004 |
| 6  | 22.860028576 | 34.255853833 | 42.372468000 |
| 7  | 22.764955412 | 35.353555734 | 41.434319575 |
| 6  | 23.707167653 | 35.366961588 | 40.414702556 |

|   |              |              |              |
|---|--------------|--------------|--------------|
| 6 | 21.759755376 | 36.303900081 | 41.527382522 |
| 7 | 21.695060013 | 37.292125904 | 40.643994174 |
| 6 | 20.799066615 | 36.185493354 | 42.567046522 |
| 6 | 20.902097748 | 35.183123882 | 43.482086369 |
| 7 | 21.935265118 | 34.277484440 | 43.411117001 |
| 1 | 24.329388968 | 34.476528986 | 40.384510713 |
| 1 | 26.050273583 | 36.020414246 | 40.000891001 |
| 1 | 20.971571915 | 38.008243626 | 40.762317170 |
| 1 | 20.174529959 | 35.077713383 | 44.292723271 |
| 1 | 19.980896690 | 36.902863257 | 42.629422132 |
| 1 | 23.437631269 | 35.869977647 | 39.492205733 |
| 1 | 22.361684829 | 37.445914152 | 39.894268161 |
| 8 | 27.024291865 | 39.588546568 | 37.205807543 |
| 1 | 27.977042687 | 39.370775028 | 37.161936971 |
| 1 | 26.858288041 | 39.672779129 | 38.171830978 |
| 1 | 23.512112983 | 36.815359724 | 45.553951314 |
| 1 | 23.999275241 | 41.659747199 | 40.655473214 |
| 1 | 29.326859542 | 39.878067929 | 45.882915499 |
| 1 | 25.267483481 | 43.309876953 | 34.254190333 |
| 1 | 22.033734294 | 33.584139920 | 44.124944491 |

**PD**

**QM/MM (BS1) = -3309.851902 a.u.**

**QM/MM (BS2+ZPE) = -3311.714112 a.u.**

|    |              |              |              |
|----|--------------|--------------|--------------|
| 6  | 24.435134797 | 36.690708076 | 44.876468447 |
| 7  | 25.612850134 | 36.107028290 | 45.279963459 |
| 1  | 25.785563306 | 35.609704971 | 46.164062910 |
| 6  | 26.539700239 | 36.343346694 | 44.338826288 |
| 1  | 27.566387325 | 35.993595823 | 44.413903866 |
| 7  | 26.027347937 | 37.049391088 | 43.337303411 |
| 6  | 24.708741591 | 37.277847744 | 43.661427476 |
| 1  | 24.050233232 | 37.857707912 | 43.020016104 |
| 6  | 24.795746703 | 41.269155958 | 40.113610501 |
| 1  | 25.594276849 | 41.948404948 | 40.439169161 |
| 1  | 24.647579232 | 41.370024470 | 39.029898719 |
| 6  | 25.144585388 | 39.810908605 | 40.416853894 |
| 8  | 26.050992894 | 39.617676659 | 41.297809419 |
| 8  | 24.555253741 | 38.901245850 | 39.795527365 |
| 6  | 29.004003433 | 39.916463395 | 45.317919602 |
| 7  | 28.092889827 | 40.859459624 | 44.912219736 |
| 1  | 27.792037797 | 41.708196006 | 45.409733252 |
| 6  | 27.597146166 | 40.470841658 | 43.723510196 |
| 1  | 26.840135796 | 41.017228661 | 43.166033786 |
| 7  | 28.137041762 | 39.321155474 | 43.342194210 |
| 6  | 29.020622980 | 38.958624428 | 44.330892688 |
| 1  | 29.596681798 | 38.037148631 | 44.275680573 |
| 6  | 24.484649303 | 42.864162931 | 34.943529940 |
| 1  | 23.576546123 | 43.171626396 | 34.398950034 |
| 1  | 24.569559090 | 43.520334740 | 35.828091728 |
| 7  | 24.438909027 | 41.466138924 | 35.340462535 |
| 1  | 25.226624965 | 40.846107434 | 35.117851112 |
| 6  | 23.610916281 | 41.030063733 | 36.308545257 |
| 7  | 22.611899756 | 41.797203604 | 36.743074387 |
| 1  | 22.319051966 | 42.674240217 | 36.298580151 |
| 1  | 22.068612895 | 41.457746384 | 37.545326327 |
| 7  | 23.801756647 | 39.817253530 | 36.838451564 |
| 1  | 24.697189604 | 39.350647612 | 36.716056274 |
| 1  | 23.141004524 | 39.427828543 | 37.521911049 |
| 26 | 27.166719498 | 38.071258529 | 41.889620240 |
| 8  | 24.506035229 | 36.288675048 | 40.532608935 |
| 8  | 29.165699331 | 38.170198704 | 39.458182340 |

|   |              |              |              |
|---|--------------|--------------|--------------|
| 6 | 29.479530936 | 37.335633233 | 40.324198747 |
| 8 | 28.721090654 | 37.031320812 | 41.323780814 |
| 6 | 30.844393718 | 36.641429815 | 40.276792789 |
| 6 | 30.933031547 | 35.278612086 | 40.967913839 |
| 6 | 32.332627121 | 34.630091635 | 41.017400289 |
| 8 | 32.366264379 | 33.371892561 | 41.002419752 |
| 8 | 33.348053877 | 35.373564148 | 41.106367838 |
| 1 | 30.244760127 | 34.554626128 | 40.508068616 |
| 1 | 30.587730549 | 35.385846389 | 42.011736405 |
| 1 | 31.564084481 | 37.330421234 | 40.754894511 |
| 1 | 31.152328129 | 36.582405676 | 39.222722187 |
| 8 | 23.493505274 | 33.467766873 | 42.083359853 |
| 6 | 22.642406263 | 34.304406571 | 42.279003169 |
| 7 | 22.445587438 | 35.382507821 | 41.375416242 |
| 6 | 23.431037620 | 35.474555055 | 40.243169682 |
| 6 | 21.465436521 | 36.320991956 | 41.538648616 |
| 7 | 21.313113988 | 37.318309594 | 40.677100095 |
| 6 | 20.581166817 | 36.204670256 | 42.653656814 |
| 6 | 20.760829674 | 35.195387819 | 43.546091861 |
| 7 | 21.787734094 | 34.298024185 | 43.392586103 |
| 1 | 23.778177271 | 34.445760213 | 40.096614508 |
| 1 | 24.379765642 | 37.227224468 | 40.255020225 |
| 1 | 20.606493330 | 38.028239996 | 40.883564124 |
| 1 | 20.093236141 | 35.081390011 | 44.406419167 |
| 1 | 19.758961143 | 36.907772868 | 42.773732387 |
| 1 | 22.860499851 | 35.785221269 | 39.352487688 |
| 1 | 21.823679141 | 37.466770245 | 39.804213804 |
| 8 | 26.662025672 | 38.557812080 | 37.840678645 |
| 1 | 27.482330366 | 38.509846586 | 38.367889979 |
| 1 | 25.949800805 | 38.382537780 | 38.479739666 |
| 1 | 23.576602237 | 36.797254803 | 45.539519698 |
| 1 | 23.876236927 | 41.570003437 | 40.615666162 |
| 1 | 29.483068343 | 39.950949284 | 46.296374945 |
| 1 | 25.353767789 | 43.057002651 | 34.314631519 |
| 1 | 21.943990785 | 33.598142854 | 44.089524023 |

**Snapshot 2**

**RC2**

**QM/MM (BS1) = -3461.229779 a.u.**

**QM/MM (BS2+ZPE) = -3463.249318 a.u.**

|   |              |              |              |
|---|--------------|--------------|--------------|
| 6 | 23.741634603 | 37.364676179 | 43.845800212 |
| 7 | 24.922306855 | 36.902004778 | 44.375894064 |
| 1 | 25.042991384 | 36.504612831 | 45.318949730 |
| 6 | 25.893464347 | 37.100639952 | 43.468525626 |
| 1 | 26.931665706 | 36.821629549 | 43.629020725 |
| 7 | 25.402713579 | 37.677782388 | 42.377508001 |
| 6 | 24.054697340 | 37.853046491 | 42.597069245 |
| 1 | 23.421450384 | 38.362634810 | 41.875400200 |
| 6 | 24.366742305 | 41.597055147 | 38.852054998 |
| 1 | 24.851759220 | 42.569579969 | 39.027759901 |
| 1 | 24.499936938 | 41.376119037 | 37.783605719 |
| 6 | 25.163661847 | 40.549334545 | 39.617859834 |
| 8 | 24.625623668 | 39.698575520 | 40.390132041 |
| 8 | 26.419238049 | 40.505224859 | 39.467629853 |
| 6 | 27.791454702 | 40.845904325 | 44.250957068 |
| 7 | 26.796081610 | 41.671052516 | 43.779885809 |
| 1 | 26.417333741 | 42.526537152 | 44.206567510 |
| 6 | 26.339624803 | 41.157718156 | 42.628077788 |
| 1 | 25.551471839 | 41.622341760 | 42.046537699 |
| 7 | 26.991690588 | 40.045798527 | 42.320991918 |
| 6 | 27.908944920 | 39.835326542 | 43.327907387 |
| 1 | 28.575987607 | 38.978418975 | 43.304550763 |

|    |              |              |              |
|----|--------------|--------------|--------------|
| 6  | 25.120607388 | 42.422664140 | 33.295314691 |
| 1  | 24.252132270 | 42.398281060 | 32.614386367 |
| 1  | 24.993895525 | 43.311159493 | 33.939302559 |
| 7  | 25.237956872 | 41.216491460 | 34.084267507 |
| 1  | 26.089264130 | 40.645458714 | 34.040954482 |
| 6  | 24.299371886 | 40.794523416 | 34.959357658 |
| 7  | 23.136327962 | 41.431562736 | 35.096931566 |
| 1  | 22.877804307 | 42.264897489 | 34.560990120 |
| 1  | 22.410373888 | 40.985373127 | 35.679944705 |
| 7  | 24.556518797 | 39.711134177 | 35.687325283 |
| 1  | 25.511231888 | 39.352157180 | 35.776537762 |
| 1  | 23.939576766 | 39.394266248 | 36.447663617 |
| 26 | 26.494307128 | 38.648460301 | 40.805871849 |
| 8  | 26.145687877 | 37.583227192 | 39.649995996 |
| 8  | 28.987625540 | 38.353787633 | 38.884726259 |
| 6  | 29.193165868 | 37.909901024 | 40.016707505 |
| 8  | 28.356370867 | 38.043344514 | 41.006708760 |
| 6  | 30.533450129 | 37.235773279 | 40.348954505 |
| 6  | 30.491205306 | 35.930454103 | 41.152210384 |
| 6  | 31.873554454 | 35.314606881 | 41.487184472 |
| 8  | 31.905823667 | 34.070856849 | 41.655734924 |
| 8  | 32.872337188 | 36.077846731 | 41.602456957 |
| 1  | 29.908652054 | 35.158620594 | 40.626841327 |
| 1  | 29.968349900 | 36.099689406 | 42.111544029 |
| 1  | 31.135454699 | 37.970743819 | 40.913251115 |
| 1  | 31.048684298 | 37.079866776 | 39.390419796 |
| 8  | 22.827921688 | 34.038616645 | 41.831908413 |
| 6  | 21.860267245 | 34.758884466 | 41.903814002 |
| 7  | 21.544942693 | 35.676385856 | 40.864373680 |
| 6  | 22.442838648 | 35.672159518 | 39.697575888 |
| 6  | 20.486358580 | 36.538170654 | 40.920139633 |
| 7  | 20.263069599 | 37.418651766 | 39.955611981 |
| 6  | 19.609742467 | 36.461221678 | 42.043040208 |
| 6  | 19.864978725 | 35.577996813 | 43.036902001 |
| 7  | 20.973066386 | 34.770890530 | 42.989773354 |
| 1  | 21.852055303 | 35.688232563 | 38.774094066 |
| 1  | 23.033515368 | 34.752512289 | 39.730572365 |
| 1  | 20.796339066 | 37.510435501 | 39.080657580 |
| 1  | 19.196928284 | 35.507732156 | 43.899939690 |
| 1  | 18.742609947 | 37.105491571 | 42.107321655 |
| 1  | 23.117697340 | 36.539353460 | 39.710248948 |
| 1  | 19.494722273 | 38.072885310 | 40.083207824 |
| 8  | 27.517154743 | 42.905874799 | 40.330885981 |
| 1  | 28.215744723 | 42.689733357 | 40.963606220 |
| 1  | 27.286767236 | 42.048913028 | 39.915970493 |
| 8  | 23.655390120 | 38.343719930 | 37.944770482 |
| 1  | 22.678545932 | 38.205380122 | 37.743364621 |
| 1  | 23.687820129 | 38.690887145 | 38.851533224 |
| 8  | 26.729836180 | 38.347158291 | 36.909265910 |
| 1  | 25.993499167 | 37.918548230 | 37.378734413 |
| 1  | 27.364902733 | 38.538348337 | 37.625991429 |
| 1  | 22.832404926 | 37.476485828 | 44.436450119 |
| 1  | 23.304025126 | 41.703872432 | 39.069516679 |
| 1  | 28.257776706 | 41.005122901 | 45.223202177 |
| 1  | 26.019628251 | 42.586727926 | 32.701250818 |
| 1  | 21.162317607 | 34.151649869 | 43.751808442 |

**TS7**

**QM/MM (BS1) = -3461.191003 a.u.**

**QM/MM (BS2+ZPE) = -3463.210017 a.u.**

|   |              |              |              |
|---|--------------|--------------|--------------|
| 6 | 23.494496111 | 37.292507208 | 44.081041010 |
|---|--------------|--------------|--------------|





|   |              |              |              |
|---|--------------|--------------|--------------|
| 6 | 31.504271175 | 33.832607720 | 40.872043840 |
| 8 | 31.154222255 | 32.646482963 | 40.660019153 |
| 8 | 32.681944273 | 34.224000771 | 41.068124622 |
| 1 | 29.535104807 | 34.499979078 | 40.314310832 |
| 1 | 30.028205450 | 34.988087363 | 41.938491051 |
| 1 | 31.715717841 | 36.570719950 | 40.980762554 |
| 1 | 31.211993732 | 36.137490648 | 39.338988096 |
| 8 | 22.274330175 | 34.637095370 | 41.720542743 |
| 6 | 21.774314413 | 35.675190931 | 42.081856449 |
| 7 | 21.951932545 | 36.865147847 | 41.330519457 |
| 6 | 22.788572343 | 36.766089973 | 40.123487674 |
| 6 | 21.371113777 | 38.052558590 | 41.665551649 |
| 7 | 21.537464683 | 39.120869325 | 40.897380026 |
| 6 | 20.589698134 | 38.118060293 | 42.853020030 |
| 6 | 20.419273769 | 37.000110965 | 43.604731897 |
| 7 | 21.000411218 | 35.814189496 | 43.243583850 |
| 1 | 22.194057759 | 37.014723242 | 39.234782777 |
| 1 | 23.140582351 | 35.734718979 | 40.036010526 |
| 1 | 21.047416261 | 39.983914597 | 41.130762100 |
| 1 | 19.822912098 | 37.032304865 | 44.519393705 |
| 1 | 20.158989377 | 39.061913572 | 43.160568677 |
| 1 | 23.652342541 | 37.443679987 | 40.210769725 |
| 1 | 22.106526905 | 39.135665550 | 40.053684194 |
| 8 | 27.579071418 | 39.865052952 | 38.450603066 |
| 1 | 26.806809932 | 39.526168932 | 38.930085502 |
| 1 | 28.278591088 | 39.268759809 | 38.793763447 |
| 8 | 23.543729688 | 40.973276178 | 39.326332288 |
| 1 | 22.790947503 | 41.496931383 | 39.730205693 |
| 1 | 24.147804426 | 40.791734815 | 40.092456598 |
| 1 | 23.845628325 | 37.268998604 | 45.272208223 |
| 1 | 25.636787949 | 43.053020317 | 42.096137366 |
| 1 | 30.202636734 | 38.340294512 | 46.704388860 |
| 1 | 28.380067737 | 45.488980709 | 36.756547034 |
| 1 | 20.905571209 | 35.003981344 | 43.821978705 |

**TS7**

**QM/MM (BS1) = -3386.878586 a.u.**

**QM/MM (BS2+ZPE) = -3388.828717 a.u.**

|   |              |              |              |
|---|--------------|--------------|--------------|
| 6 | 24.546414623 | 36.916959486 | 44.875006563 |
| 7 | 25.576636482 | 36.051224438 | 45.137907435 |
| 1 | 25.606308487 | 35.344441852 | 45.889400428 |
| 6 | 26.559234632 | 36.294787511 | 44.259481192 |
| 1 | 27.493631153 | 35.741734923 | 44.238989269 |
| 7 | 26.207674874 | 37.277310841 | 43.437895677 |
| 6 | 24.950293871 | 37.682002941 | 43.811962872 |
| 1 | 24.442311620 | 38.508988091 | 43.321486715 |
| 6 | 26.765476861 | 42.769009147 | 41.739921622 |
| 1 | 27.596051896 | 42.924481465 | 42.444446647 |
| 1 | 26.918357962 | 43.404849277 | 40.856878731 |
| 6 | 26.700213250 | 41.321827652 | 41.252905305 |
| 8 | 27.063898374 | 40.411252696 | 42.071349021 |
| 8 | 26.330196563 | 41.122855615 | 40.082403834 |
| 6 | 29.604250134 | 38.594380768 | 45.711558624 |
| 7 | 28.943798144 | 39.795423852 | 45.696346318 |
| 1 | 28.912290205 | 40.492634590 | 46.452773566 |
| 6 | 28.319295699 | 39.912027059 | 44.514728986 |
| 1 | 27.718341059 | 40.768379445 | 44.229479975 |
| 7 | 28.538274589 | 38.848880570 | 43.751282895 |
| 6 | 29.346693973 | 38.011469268 | 44.489174625 |
| 1 | 29.687297190 | 37.054152990 | 44.100861354 |
| 6 | 27.459813499 | 45.395774741 | 37.312269994 |

|    |              |               |              |
|----|--------------|---------------|--------------|
| 1  | 26.843360618 | 46.288813711  | 37.125958220 |
| 1  | 27.733160483 | 45.407797775  | 38.382044719 |
| 7  | 26.787388461 | 44.161555889  | 36.945172656 |
| 1  | 27.315843060 | 43.466457231  | 36.407126195 |
| 6  | 25.709020257 | 43.656630368  | 37.577279706 |
| 7  | 25.005964307 | 44.390375312  | 38.440234790 |
| 1  | 25.111144794 | 45.407245632  | 38.531872070 |
| 1  | 24.199795535 | 43.976058393  | 38.928392330 |
| 7  | 25.352211220 | 42.398558793  | 37.290733729 |
| 1  | 26.065365459 | 41.786821686  | 36.894971997 |
| 1  | 24.656184490 | 41.919031864  | 37.880581557 |
| 26 | 27.157940003 | 38.407674202  | 41.955535284 |
| 8  | 25.745996083 | 38.132442754  | 40.958409879 |
| 8  | 28.863369218 | 37.702240209  | 38.929370673 |
| 6  | 29.184052700 | 37.207652556  | 40.015009254 |
| 8  | 28.608601235 | 37.482997026  | 41.147152201 |
| 6  | 30.350302952 | 36.235124692  | 40.110451123 |
| 6  | 30.053757986 | 34.923903100  | 40.837140261 |
| 6  | 31.254184071 | 33.955880476  | 40.813163605 |
| 8  | 30.979332133 | 32.733469627  | 40.958409879 |
| 8  | 32.408125046 | 34.442644211  | 40.897030769 |
| 1  | 29.188521221 | 34.407244740  | 40.394085588 |
| 1  | 29.790322036 | 35.128284186  | 41.890805137 |
| 1  | 31.185018318 | 36.739912971  | 40.626541019 |
| 1  | 30.692444244 | 36.018727366  | 39.090294210 |
| 8  | 22.634546293 | 34.848017622  | 41.722477553 |
| 6  | 22.104717156 | 35.897353870  | 41.987822917 |
| 7  | 22.463201859 | 37.089908486  | 41.274565964 |
| 6  | 23.550160144 | 36.977194822  | 40.342382700 |
| 6  | 21.768611840 | 38.271617572  | 41.428014253 |
| 7  | 22.119374741 | 39.343283650  | 40.743790960 |
| 6  | 20.682446231 | 38.304059010  | 42.346663391 |
| 6  | 20.411934224 | 37.219574052  | 43.121004380 |
| 7  | 21.133855655 | 36.061882401  | 42.986245065 |
| 1  | 23.335436215 | 37.468871449  | 39.385955445 |
| 1  | 23.848915368 | 35.931275746  | 40.227776381 |
| 1  | 21.605599445 | 40.231199433  | 40.829131729 |
| 1  | 19.612204189 | 37.249437228  | 43.865600183 |
| 1  | 20.092882762 | 39.2111289080 | 42.427185277 |
| 1  | 24.664693967 | 37.568384966  | 40.735216611 |
| 1  | 22.917922097 | 39.409932699  | 40.112043205 |
| 8  | 27.435687646 | 40.023727788  | 37.799236880 |
| 1  | 27.052206441 | 40.349151682  | 38.637055442 |
| 1  | 27.833756792 | 39.172978213  | 38.066232552 |
| 8  | 23.834516481 | 41.028322910  | 39.221744934 |
| 1  | 23.413556742 | 41.847774084  | 39.611426748 |
| 1  | 24.730273480 | 40.966546805  | 39.633374131 |
| 1  | 23.713016665 | 37.096628910  | 45.554148718 |
| 1  | 25.853981014 | 43.093847681  | 42.241641229 |
| 1  | 30.117157770 | 38.266463740  | 46.615695504 |
| 1  | 28.375127719 | 45.482932848  | 36.726889215 |
| 1  | 20.991233644 | 35.288584601  | 43.604016835 |

**Snapshot 4**

**RC2**

**QM/MM (BS1) = -3387.759704 a.u.**

**QM/MM (BS2+ZPE) = -3389.705321 a.u.**

|   |              |              |              |
|---|--------------|--------------|--------------|
| 6 | 25.791583624 | 38.862391534 | 45.691503203 |
| 7 | 27.157436618 | 38.756990131 | 45.775370177 |
| 1 | 27.720823816 | 38.859531924 | 46.634749626 |
| 6 | 27.628247595 | 38.527310975 | 44.538094406 |

|    |              |              |              |
|----|--------------|--------------|--------------|
| 1  | 28.683756316 | 38.399391826 | 44.313103289 |
| 7  | 26.631867580 | 38.480121155 | 43.660169511 |
| 6  | 25.471177505 | 38.693744115 | 44.364790359 |
| 1  | 24.503356788 | 38.763803489 | 43.871644297 |
| 6  | 23.623288598 | 40.661675446 | 39.596286299 |
| 1  | 23.995247848 | 41.611577914 | 39.183451642 |
| 1  | 23.275245742 | 40.077820635 | 38.729665339 |
| 6  | 24.811382239 | 39.931117387 | 40.191620573 |
| 8  | 24.778530556 | 39.451604032 | 41.375072853 |
| 8  | 25.848628624 | 39.805548484 | 39.492405730 |
| 6  | 28.631810197 | 42.253580314 | 42.849030356 |
| 7  | 27.374260656 | 42.725753606 | 42.575539447 |
| 1  | 27.040743112 | 43.687405301 | 42.721894078 |
| 6  | 26.647101143 | 41.717958639 | 42.075049642 |
| 1  | 25.607619810 | 41.823973035 | 41.787904848 |
| 7  | 27.374540633 | 40.611335921 | 41.994773057 |
| 6  | 28.623614395 | 40.928128574 | 42.481521583 |
| 1  | 29.409304246 | 40.180105359 | 42.534102190 |
| 6  | 22.079003904 | 39.003877967 | 34.855261503 |
| 1  | 21.012854588 | 38.818619796 | 34.671497607 |
| 1  | 22.168269036 | 40.031602834 | 35.248753339 |
| 7  | 22.652907352 | 38.037051972 | 35.774146230 |
| 1  | 23.498720708 | 37.525337175 | 35.500034442 |
| 6  | 22.284867676 | 37.905446902 | 37.061736470 |
| 7  | 21.197631086 | 38.522949766 | 37.532527186 |
| 1  | 20.561278775 | 39.073170786 | 36.945643174 |
| 1  | 20.903815336 | 38.360110158 | 38.505226461 |
| 7  | 23.026674964 | 37.136849037 | 37.869029892 |
| 1  | 24.014922774 | 36.974724697 | 37.643178096 |
| 1  | 22.850750104 | 37.145789614 | 38.884556647 |
| 26 | 26.682960919 | 38.641440305 | 41.540920972 |
| 8  | 26.073106169 | 37.172518447 | 41.273124030 |
| 8  | 28.193365251 | 36.759134509 | 39.322613230 |
| 6  | 28.904323500 | 37.405415704 | 40.086352084 |
| 8  | 28.471688671 | 38.277458455 | 40.966413558 |
| 6  | 30.421521256 | 37.270804120 | 40.027939192 |
| 6  | 31.067532375 | 36.521585493 | 41.200094506 |
| 6  | 32.582841191 | 36.339220562 | 40.984225733 |
| 8  | 33.101736251 | 35.256022827 | 41.362314728 |
| 8  | 33.204699692 | 37.283406037 | 40.436661755 |
| 1  | 30.613631727 | 35.530565048 | 41.349638420 |
| 1  | 30.915568968 | 37.085801822 | 42.138294981 |
| 1  | 30.874901670 | 38.272314255 | 39.964832958 |
| 1  | 30.654023430 | 36.741062424 | 39.096555806 |
| 8  | 25.574112618 | 34.584525071 | 46.271218747 |
| 6  | 24.527801888 | 35.171777772 | 46.136458945 |
| 7  | 23.910758646 | 35.276695126 | 44.865655948 |
| 6  | 24.610183276 | 34.632915002 | 43.740431713 |
| 6  | 22.738295165 | 35.943262135 | 44.650874026 |
| 7  | 22.244107068 | 36.011094027 | 43.425774221 |
| 6  | 22.080749163 | 36.544555760 | 45.765589515 |
| 6  | 22.642859117 | 36.448543681 | 47.001936104 |
| 7  | 23.838076786 | 35.804416513 | 47.187555767 |
| 1  | 23.948571795 | 33.898408863 | 43.262353888 |
| 1  | 25.485778547 | 34.113526463 | 44.136965419 |
| 1  | 21.371970050 | 36.506121457 | 43.190668437 |
| 1  | 22.149865146 | 36.886762150 | 47.873676732 |
| 1  | 21.130649010 | 37.049739059 | 45.614931620 |
| 1  | 24.931407127 | 35.391425394 | 43.008980879 |
| 1  | 22.693633775 | 35.556848901 | 42.632795737 |
| 8  | 22.736527496 | 37.219015230 | 40.667835440 |
| 1  | 21.813617852 | 37.600829728 | 40.679110149 |

|   |              |              |              |
|---|--------------|--------------|--------------|
| 1 | 23.322499609 | 37.853126925 | 41.118258737 |
| 8 | 25.915461377 | 37.354982308 | 37.884765840 |
| 1 | 25.877243011 | 38.276988673 | 38.199134460 |
| 1 | 26.603680843 | 36.973827228 | 38.478097232 |
| 1 | 25.169051284 | 39.201486050 | 46.519474046 |
| 1 | 22.769232005 | 40.886278718 | 40.235197891 |
| 1 | 29.364835625 | 42.904442014 | 43.325601534 |
| 1 | 22.597495657 | 38.971119334 | 33.897054587 |
| 1 | 24.300685024 | 35.801107276 | 48.074096890 |

**TS7**

**QM/MM (BS1) = -3387.728665 a.u.**

**QM/MM (BS2+ZPE) = -3389.668228 a.u.**

|    |              |              |              |
|----|--------------|--------------|--------------|
| 6  | 25.790958543 | 38.887644745 | 45.921499728 |
| 7  | 27.159027886 | 38.854086923 | 46.001658566 |
| 1  | 27.727997957 | 39.006075058 | 46.848871622 |
| 6  | 27.637237311 | 38.601210874 | 44.773955516 |
| 1  | 28.696054453 | 38.512113232 | 44.548474635 |
| 7  | 26.639725306 | 38.466745591 | 43.910218255 |
| 6  | 25.473070393 | 38.649483635 | 44.608231368 |
| 1  | 24.499421456 | 38.640197336 | 44.121157138 |
| 6  | 23.632613448 | 40.599152525 | 39.565714343 |
| 1  | 23.988113819 | 41.566246130 | 39.180533801 |
| 1  | 23.222338045 | 40.072471553 | 38.688002860 |
| 6  | 24.871714960 | 39.816679897 | 39.988254613 |
| 8  | 24.848525878 | 39.118996265 | 41.078621387 |
| 8  | 25.848548591 | 39.852001774 | 39.226296023 |
| 6  | 28.569439202 | 42.075444827 | 42.841962591 |
| 7  | 27.295642713 | 42.513361305 | 42.590410248 |
| 1  | 26.944636793 | 43.468252321 | 42.742821228 |
| 6  | 26.586605637 | 41.478402209 | 42.112498479 |
| 1  | 25.540797185 | 41.555665416 | 41.838509423 |
| 7  | 27.333287176 | 40.387166690 | 42.029476596 |
| 6  | 28.583192726 | 40.744225139 | 42.485117083 |
| 1  | 29.392489507 | 40.019700320 | 42.531896807 |
| 6  | 22.075455533 | 39.036642691 | 34.828648919 |
| 1  | 21.005879106 | 38.877277565 | 34.642442082 |
| 1  | 22.188867393 | 40.055976585 | 35.236958238 |
| 7  | 22.627571229 | 38.041539046 | 35.729169857 |
| 1  | 23.465015567 | 37.520673483 | 35.446848249 |
| 6  | 22.241617274 | 37.879700043 | 37.006944506 |
| 7  | 21.158180181 | 38.498796259 | 37.482290103 |
| 1  | 20.535970492 | 39.076391814 | 36.906934821 |
| 1  | 20.865908073 | 38.325508501 | 38.453259303 |
| 7  | 22.963590580 | 37.074586270 | 37.797665610 |
| 1  | 23.962074790 | 36.946100896 | 37.588984778 |
| 1  | 22.780393549 | 37.067119780 | 38.810652975 |
| 26 | 26.533375846 | 38.254646471 | 41.820052244 |
| 8  | 25.726410455 | 36.729962449 | 42.068908477 |
| 8  | 27.930659995 | 36.520373873 | 39.326218118 |
| 6  | 28.677802087 | 37.030243434 | 40.160974908 |
| 8  | 28.273275625 | 37.779480359 | 41.149078507 |
| 6  | 30.187186372 | 36.855939232 | 40.035348208 |
| 6  | 30.957756730 | 36.391146598 | 41.274930784 |
| 6  | 32.465541931 | 36.250489586 | 40.977703057 |
| 8  | 33.040910887 | 35.198281128 | 41.364846577 |
| 8  | 33.024229426 | 37.190741994 | 40.359510310 |
| 1  | 30.581187690 | 35.427813331 | 41.649529866 |
| 1  | 30.830434524 | 37.129328116 | 42.087012334 |
| 1  | 30.613847468 | 37.822099512 | 39.713754345 |
| 1  | 30.346327815 | 36.149332492 | 39.212296147 |

|   |              |              |              |    |              |              |              |
|---|--------------|--------------|--------------|----|--------------|--------------|--------------|
| 8 | 25.690354762 | 34.745553819 | 46.158062109 | 1  | 23.418840296 | 38.045876997 | 32.353111959 |
| 6 | 24.629348737 | 35.302386072 | 46.029512414 | 1  | 22.587014852 | 38.222657886 | 33.890226418 |
| 7 | 24.042531925 | 35.452790254 | 44.732874407 | 7  | 23.875623552 | 36.533413536 | 35.209018917 |
| 6 | 24.798124735 | 34.938113229 | 43.623723137 | 1  | 24.657888044 | 36.199305213 | 35.789227448 |
| 6 | 22.810585948 | 36.037198791 | 44.536556738 | 1  | 23.068364061 | 36.934008577 | 35.706648598 |
| 7 | 22.335007681 | 36.154889107 | 43.313129213 | 26 | 26.587135190 | 39.617034841 | 38.877778966 |
| 6 | 22.091215124 | 36.503014472 | 45.676149199 | 8  | 25.684050467 | 38.283552265 | 39.001118287 |
| 6 | 22.645379599 | 36.396573697 | 46.915314578 | 8  | 28.544341955 | 36.916391377 | 38.532650204 |
| 7 | 23.886443867 | 35.843589351 | 47.091579244 | 6  | 28.975382897 | 37.876556656 | 39.176627663 |
| 1 | 24.184901867 | 34.332868592 | 42.946689923 | 8  | 28.308590607 | 38.969503391 | 39.417821219 |
| 1 | 25.688098266 | 34.410029239 | 43.975080219 | 6  | 30.398946227 | 37.879006402 | 39.722934184 |
| 1 | 21.411691623 | 36.564181653 | 43.103476452 | 6  | 30.503609956 | 37.881582559 | 41.250905132 |
| 1 | 22.109862765 | 36.756110219 | 47.797990310 | 6  | 31.944253074 | 37.647723093 | 41.747582135 |
| 1 | 21.105449367 | 36.941501637 | 45.540668335 | 8  | 32.897791117 | 38.101533278 | 41.066619404 |
| 1 | 25.279108981 | 35.881631078 | 42.857985046 | 8  | 32.067008035 | 37.009811546 | 42.822492086 |
| 1 | 22.865504455 | 35.911577160 | 42.477821999 | 1  | 29.867215655 | 37.100901080 | 41.694297663 |
| 8 | 22.754699697 | 37.165982256 | 40.615041961 | 1  | 30.144180571 | 38.843747958 | 41.658849836 |
| 1 | 21.840658656 | 37.568758915 | 40.608879258 | 1  | 30.930170979 | 38.757371557 | 39.321325213 |
| 1 | 23.391672765 | 37.836834145 | 40.937483158 | 1  | 30.907923103 | 36.987856558 | 39.340137787 |
| 8 | 25.824992293 | 37.323765480 | 37.800725879 | 8  | 22.751702808 | 38.269821137 | 43.064554217 |
| 1 | 25.879377452 | 38.259695462 | 38.073774301 | 6  | 21.871381941 | 38.780926988 | 42.414616735 |
| 1 | 26.483558739 | 36.896767495 | 38.397418847 | 7  | 21.735840010 | 38.503247719 | 41.025045942 |
| 1 | 25.147250023 | 39.239954913 | 46.727467598 | 6  | 22.719337422 | 37.561297272 | 40.448677005 |
| 1 | 22.809132615 | 40.803244257 | 40.250033867 | 6  | 20.763717850 | 39.067972058 | 40.248493866 |
| 1 | 29.301033031 | 42.759152453 | 43.272522315 | 7  | 20.708013832 | 38.841306339 | 38.944352464 |
| 1 | 22.592862811 | 39.002629416 | 33.869899672 | 6  | 19.785589983 | 39.906720057 | 40.870296147 |
| 1 | 24.331681322 | 35.836112759 | 47.986945202 | 6  | 19.890034527 | 40.184908039 | 42.196173409 |

#### Snapshot 5

##### RC2

QM/MM (BS1) = -3307.735939 a.u.

QM/MM (BS2+ZPE) = -3309.615721 a.u.

|   |              |              |              |
|---|--------------|--------------|--------------|
| 6 | 24.041723945 | 41.695961846 | 41.500221569 |
| 7 | 25.181630939 | 41.650996126 | 42.262388432 |
| 1 | 25.338855231 | 42.107413356 | 43.176498134 |
| 6 | 26.101890622 | 40.944694970 | 41.594926685 |
| 1 | 27.102950570 | 40.755052645 | 41.972180908 |
| 7 | 25.605594283 | 40.522756692 | 40.435914541 |
| 6 | 24.314940667 | 40.987522687 | 40.355252736 |
| 1 | 23.690569866 | 40.812043294 | 39.481602773 |
| 6 | 24.974164088 | 40.560362112 | 34.962892107 |
| 1 | 25.570974074 | 41.426409105 | 34.630149141 |
| 1 | 24.816004682 | 39.926756411 | 34.080420516 |
| 6 | 25.806534860 | 39.755498831 | 35.963017946 |
| 8 | 25.812746644 | 40.187090075 | 37.176923525 |
| 8 | 26.470150187 | 38.805785258 | 35.535059567 |
| 6 | 28.547063218 | 43.487502530 | 39.294856756 |
| 7 | 27.648716764 | 43.706981271 | 38.282185680 |
| 1 | 27.417429835 | 44.606970772 | 37.841908130 |
| 6 | 27.086767806 | 42.531757708 | 37.965436695 |
| 1 | 26.325247211 | 42.402553981 | 37.206633943 |
| 7 | 27.577417194 | 41.555207382 | 38.717044366 |
| 6 | 28.497552701 | 42.137030136 | 39.560201480 |
| 1 | 29.046171721 | 41.552182779 | 40.294426520 |
| 6 | 25.813986760 | 36.977140846 | 32.165911670 |
| 1 | 25.108974781 | 37.259099047 | 31.368702001 |
| 1 | 26.319905156 | 37.897997886 | 32.508817438 |
| 7 | 25.149391233 | 36.324447785 | 33.278413214 |
| 1 | 25.667677369 | 35.596432957 | 33.780153083 |
| 6 | 24.123799940 | 36.896986675 | 33.946994124 |
| 7 | 23.353755574 | 37.804343530 | 33.342845286 |

|    |              |              |              |
|----|--------------|--------------|--------------|
| 1  | 23.418840296 | 38.045876997 | 32.353111959 |
| 1  | 22.587014852 | 38.222657886 | 33.890226418 |
| 7  | 23.875623552 | 36.533413536 | 35.209018917 |
| 1  | 24.657888044 | 36.199305213 | 35.789227448 |
| 1  | 23.068364061 | 36.934008577 | 35.706648598 |
| 26 | 26.587135190 | 39.617034841 | 38.877778966 |
| 8  | 25.684050467 | 38.283552265 | 39.001118287 |
| 8  | 28.544341955 | 36.916391377 | 38.532650204 |
| 6  | 28.975382897 | 37.876556656 | 39.176627663 |
| 8  | 28.308590607 | 38.969503391 | 39.417821219 |
| 6  | 30.398946227 | 37.879006402 | 39.722934184 |
| 6  | 30.503609956 | 37.881582559 | 41.250905132 |
| 6  | 31.944253074 | 37.647723093 | 41.747582135 |
| 8  | 32.897791117 | 38.101533278 | 41.066619404 |
| 8  | 32.067008035 | 37.009811546 | 42.822492086 |
| 1  | 29.867215655 | 37.100901080 | 41.694297663 |
| 1  | 30.144180571 | 38.843747958 | 41.658849836 |
| 1  | 30.930170979 | 38.757371557 | 39.321325213 |
| 1  | 30.907923103 | 36.987856558 | 39.340137787 |
| 8  | 22.751702808 | 38.269821137 | 43.064554217 |
| 6  | 21.871381941 | 38.780926988 | 42.414616735 |
| 7  | 21.735840010 | 38.503247719 | 41.025045942 |
| 6  | 22.719337422 | 37.561297272 | 40.448677005 |
| 6  | 20.763717850 | 39.067972058 | 40.248493866 |
| 7  | 20.708013832 | 38.841306339 | 38.944352464 |
| 6  | 19.785589983 | 39.906720057 | 40.870296147 |
| 6  | 19.890034527 | 40.184908039 | 42.196173409 |
| 7  | 20.923693974 | 39.678223876 | 42.940155658 |
| 1  | 23.554821492 | 38.079987779 | 39.905134700 |
| 1  | 22.201596614 | 36.863580731 | 39.778370147 |
| 1  | 21.308398854 | 38.205354272 | 38.405624958 |
| 1  | 19.143563315 | 40.812196052 | 42.691931369 |
| 1  | 18.956250957 | 40.306373940 | 40.288071885 |
| 1  | 23.153216141 | 36.989231625 | 41.274705588 |
| 1  | 20.019279985 | 39.379113030 | 38.405379970 |
| 8  | 26.510792820 | 36.250833382 | 36.490252379 |
| 1  | 26.608572097 | 37.170826524 | 36.155314444 |
| 1  | 26.863619433 | 36.334104254 | 37.396118859 |
| 1  | 23.208836993 | 42.362226674 | 41.724849749 |
| 1  | 24.012870757 | 40.941925611 | 35.306973124 |
| 1  | 29.068758308 | 44.327594083 | 39.753275493 |
| 1  | 26.576543734 | 36.343428764 | 31.713160978 |
| 1  | 21.059730263 | 39.985203769 | 43.882084509 |

##### TS7

QM/MM (BS1) = -3307.696418 a.u.

QM/MM (BS2+ZPE) = - 3309.580645 a.u.

|   |              |              |              |
|---|--------------|--------------|--------------|
| 6 | 23.999011690 | 41.794394752 | 41.633831373 |
| 7 | 25.160901653 | 41.772031441 | 42.362207904 |
| 1 | 25.350617269 | 42.259354643 | 43.252664351 |
| 6 | 26.055135876 | 41.032981103 | 41.695125635 |
| 1 | 27.065156229 | 40.849850209 | 42.049992586 |
| 7 | 25.520392179 | 40.566178427 | 40.573799457 |
| 6 | 24.232590538 | 41.037565625 | 40.513913812 |
| 1 | 23.581355281 | 40.828530139 | 39.667872127 |
| 6 | 24.960759631 | 40.528485655 | 35.052084609 |
| 1 | 25.598216891 | 41.386521270 | 34.778302186 |
| 1 | 24.804588836 | 39.950781931 | 34.131009405 |
| 6 | 25.739073280 | 39.628516665 | 36.017401169 |
| 8 | 25.675136424 | 39.920221490 | 37.266785447 |
| 8 | 26.417825442 | 38.717644109 | 35.526278871 |

|    |              |              |              |
|----|--------------|--------------|--------------|
| 6  | 28.484729842 | 43.357153971 | 39.307702952 |
| 7  | 27.578215284 | 43.549770992 | 38.298001037 |
| 1  | 27.338099329 | 44.444500053 | 37.852995965 |
| 6  | 27.031249747 | 42.355639883 | 38.006391971 |
| 1  | 26.267108020 | 42.208794848 | 37.252503234 |
| 7  | 27.534214105 | 41.395969586 | 38.766573997 |
| 6  | 28.450591538 | 42.007699539 | 39.591281536 |
| 1  | 29.015121706 | 41.447895728 | 40.334210674 |
| 6  | 25.845833076 | 36.982669140 | 32.152977891 |
| 1  | 25.146191356 | 37.280310201 | 31.356554637 |
| 1  | 26.350697631 | 37.895402626 | 32.518094746 |
| 7  | 25.173985460 | 36.307100296 | 33.246879399 |
| 1  | 25.687515446 | 35.565393674 | 33.732737373 |
| 6  | 24.149835889 | 36.868489395 | 33.925753732 |
| 7  | 23.387242339 | 37.794435485 | 33.341620653 |
| 1  | 23.455825140 | 38.056161541 | 32.357153719 |
| 1  | 22.623619254 | 38.209597151 | 33.895467606 |
| 7  | 23.894178295 | 36.470871871 | 35.176264623 |
| 1  | 24.675256218 | 36.122472444 | 35.749977726 |
| 1  | 23.094089648 | 36.873282191 | 35.683164738 |
| 26 | 26.275563558 | 39.374736792 | 39.051150980 |
| 8  | 24.991148788 | 38.240366501 | 39.349976033 |
| 8  | 28.422832265 | 36.680589762 | 38.527019176 |
| 6  | 28.752166096 | 37.637924599 | 39.240751388 |
| 8  | 27.955105078 | 38.601817634 | 39.580040160 |
| 6  | 30.186229488 | 37.756628972 | 39.750775554 |
| 6  | 30.350497409 | 37.797829707 | 41.273509282 |
| 6  | 31.811306429 | 37.585099395 | 41.726192631 |
| 8  | 32.741865701 | 38.038795658 | 41.015219380 |
| 8  | 31.969481219 | 36.959434776 | 42.804755191 |
| 1  | 29.737995487 | 37.024750230 | 41.761065777 |
| 1  | 29.998295077 | 38.766724691 | 41.671352792 |
| 1  | 30.634867663 | 38.664018382 | 39.312008989 |
| 1  | 30.751061652 | 36.902078281 | 39.362876433 |
| 8  | 22.873566020 | 38.251269399 | 43.058894052 |
| 6  | 22.007681601 | 38.764689142 | 42.398072083 |
| 7  | 21.884811655 | 38.453019771 | 40.997160868 |
| 6  | 22.823404584 | 37.489949224 | 40.477338346 |
| 6  | 20.913880012 | 39.025204625 | 40.204566434 |
| 7  | 20.861633453 | 38.799179782 | 38.903635349 |
| 6  | 19.937452312 | 39.867605687 | 40.817955643 |
| 6  | 20.031782427 | 40.166785681 | 42.139700920 |
| 7  | 21.062741969 | 39.676637943 | 42.897044900 |
| 1  | 23.890922580 | 37.975761313 | 39.904966400 |
| 1  | 22.376514164 | 36.856186098 | 39.703378984 |
| 1  | 21.455731770 | 38.164115864 | 38.355215850 |
| 1  | 19.279164757 | 40.800743963 | 42.618476423 |
| 1  | 19.109380867 | 40.260535903 | 40.230029316 |
| 1  | 23.264463248 | 36.912129675 | 41.295436001 |
| 1  | 20.166085671 | 39.335527552 | 38.370000417 |
| 8  | 26.518143955 | 36.153842082 | 36.432388963 |
| 1  | 26.600425450 | 37.083977801 | 36.117156160 |
| 1  | 26.936772203 | 36.198689960 | 37.315470971 |
| 1  | 23.177288646 | 42.477651948 | 41.848303213 |
| 1  | 24.004182026 | 40.925020377 | 35.392359228 |
| 1  | 29.027293704 | 44.205748254 | 39.724331709 |
| 1  | 26.608245330 | 36.353552184 | 31.693623198 |
| 1  | 21.178139149 | 39.991699906 | 43.839059732 |

**Dioxygen activation step reaction states cartesian coordinates for AlkB-ssDNA**

|                                            |              |              |              |
|--------------------------------------------|--------------|--------------|--------------|
| <b>RC1</b>                                 |              |              |              |
| <b>QM/MM (BS1) = -3425.036952 a.u.</b>     |              |              |              |
| <b>QM/MM (BS2+ZPE) = -3427.041479 a.u.</b> |              |              |              |
| 6                                          | 28.069778968 | 29.955598654 | 39.667639263 |
| 7                                          | 28.221667068 | 29.211622708 | 38.518265786 |
| 1                                          | 27.465895238 | 28.738993149 | 38.008269947 |
| 6                                          | 29.529971338 | 29.214927208 | 38.193582999 |
| 1                                          | 29.947750500 | 28.697137647 | 37.333843217 |
| 7                                          | 30.230842093 | 29.920593674 | 39.070005845 |
| 6                                          | 29.333325273 | 30.386520351 | 40.001698297 |
| 1                                          | 29.669866742 | 30.970153971 | 40.854425111 |
| 6                                          | 33.352042106 | 31.589649717 | 43.259226271 |
| 1                                          | 33.797124830 | 30.671727711 | 43.682790065 |
| 1                                          | 34.040604283 | 32.412361739 | 43.502273905 |
| 6                                          | 33.332116328 | 31.437585708 | 41.736042170 |
| 8                                          | 32.319768442 | 30.850048326 | 41.181242270 |
| 8                                          | 34.316098875 | 31.830456094 | 41.102167018 |
| 6                                          | 31.677318972 | 25.932796409 | 40.764529988 |
| 7                                          | 31.616207805 | 26.657885960 | 41.934066970 |
| 1                                          | 31.385569140 | 26.305922150 | 42.871044781 |
| 6                                          | 31.901091769 | 27.938299144 | 41.632724848 |
| 1                                          | 31.928870400 | 28.755935770 | 42.344560113 |
| 7                                          | 32.141701801 | 28.076123200 | 40.337850953 |
| 6                                          | 32.008867923 | 26.830503822 | 39.777347798 |
| 1                                          | 32.152297575 | 26.672398996 | 38.710366012 |
| 6                                          | 36.661289752 | 34.960907454 | 41.774312925 |
| 1                                          | 36.736723969 | 36.005629901 | 41.456260206 |
| 1                                          | 36.349563738 | 34.939446200 | 42.829188109 |
| 7                                          | 35.698898532 | 34.264448947 | 40.933777541 |
| 1                                          | 35.503741725 | 33.272111237 | 41.114994343 |
| 6                                          | 34.864483924 | 34.846724291 | 40.068226742 |
| 7                                          | 34.849799467 | 36.185498481 | 39.907269210 |
| 1                                          | 35.088245974 | 36.755123769 | 40.722276693 |
| 1                                          | 34.119186168 | 36.588561542 | 39.328371753 |
| 7                                          | 34.046919923 | 34.086721487 | 39.327468204 |
| 1                                          | 34.071549589 | 33.067642382 | 39.384822419 |
| 1                                          | 33.491031781 | 34.492035916 | 38.584735470 |
| 6                                          | 33.411105055 | 31.235069072 | 36.985201650 |
| 8                                          | 33.935105374 | 32.023000205 | 36.216542374 |
| 8                                          | 32.880790223 | 31.511685048 | 38.134527553 |
| 6                                          | 33.318763493 | 29.716475198 | 36.636369626 |
| 8                                          | 32.616258702 | 29.027696598 | 37.390472099 |
| 6                                          | 34.001407378 | 29.187470884 | 35.424763397 |
| 6                                          | 34.261603582 | 27.683811450 | 35.435456979 |
| 6                                          | 34.826631082 | 27.161419063 | 34.095959631 |
| 8                                          | 34.239233784 | 27.559529347 | 33.057248325 |
| 8                                          | 35.791802753 | 26.362759946 | 34.149930757 |
| 1                                          | 33.313420247 | 27.146869991 | 35.623218264 |
| 1                                          | 34.956070377 | 27.422523579 | 36.248691061 |
| 1                                          | 34.929543902 | 29.755614766 | 35.267788549 |
| 1                                          | 33.378083178 | 29.457113828 | 34.550011888 |
| 26                                         | 32.390235352 | 30.016586411 | 39.357625073 |
| 8                                          | 34.397042827 | 29.458623994 | 39.372077174 |
| 8                                          | 35.182903491 | 29.633932379 | 38.420253364 |
| 8                                          | 28.862979400 | 33.338453776 | 37.895392508 |
| 6                                          | 28.114155958 | 33.602889580 | 38.80265685  |
| 7                                          | 28.603141258 | 34.004091915 | 40.071873927 |
| 6                                          | 30.069960049 | 34.016933137 | 40.251046993 |
| 6                                          | 27.798391305 | 34.338563613 | 41.125670637 |
| 7                                          | 28.302514604 | 34.787089725 | 42.250272559 |
| 6                                          | 26.384144480 | 34.165778695 | 40.970794580 |

|   |              |              |              |
|---|--------------|--------------|--------------|
| 6 | 25.886570104 | 33.795556528 | 39.768214690 |
| 7 | 26.703839834 | 33.545044659 | 38.694884127 |
| 1 | 30.435228413 | 35.044747207 | 40.375073292 |
| 1 | 30.524890311 | 33.565399499 | 39.364889941 |
| 1 | 29.274086499 | 35.120004943 | 42.428197265 |
| 1 | 24.809803788 | 33.709744823 | 39.648681122 |
| 1 | 25.709518715 | 34.396215342 | 41.793067782 |
| 1 | 30.323024780 | 33.430496433 | 41.145665387 |
| 1 | 27.675638704 | 34.997809915 | 43.017953302 |
| 1 | 27.130320972 | 30.009063628 | 40.217755150 |
| 1 | 32.405198891 | 31.755428693 | 43.773106196 |
| 1 | 31.338816367 | 24.899215296 | 40.692464751 |
| 1 | 37.675245120 | 34.572949208 | 41.677100599 |
| 1 | 26.323798831 | 33.212022621 | 37.831960227 |

**TS1**

**QM/MM (BS1) = -3425.020416 a.u.**

**QM/MM (BS2+ZPE) = -3427.023464 a.u.**

|   |              |              |              |
|---|--------------|--------------|--------------|
| 6 | 28.085685962 | 29.957627176 | 39.685034636 |
| 7 | 28.248312455 | 29.233723526 | 38.523235480 |
| 1 | 27.496189122 | 28.769313947 | 38.000060709 |
| 6 | 29.559494158 | 29.240015094 | 38.211097972 |
| 1 | 29.997612973 | 28.748019426 | 37.346108185 |
| 7 | 30.250846649 | 29.925180789 | 39.112427334 |
| 6 | 29.346192726 | 30.377642720 | 40.042320795 |
| 1 | 29.673329270 | 30.948609451 | 40.906616614 |
| 6 | 33.401343000 | 31.491073356 | 43.237318296 |
| 1 | 33.801547476 | 30.547878565 | 43.649376803 |
| 1 | 34.113258239 | 32.284427990 | 43.506654566 |
| 6 | 33.392766905 | 31.383790342 | 41.709095422 |
| 8 | 32.429738026 | 30.722066088 | 41.143510482 |
| 8 | 34.329150396 | 31.883054344 | 41.084320869 |
| 6 | 31.677782447 | 25.856983708 | 40.772374469 |
| 7 | 31.634263672 | 26.577107535 | 41.945990646 |
| 1 | 31.410428167 | 26.224706994 | 42.884557671 |
| 6 | 31.919621297 | 27.856785263 | 41.647282868 |
| 1 | 31.965706666 | 28.669808320 | 42.362607819 |
| 7 | 32.141934581 | 27.997552735 | 40.349543183 |
| 6 | 31.998428055 | 26.756483377 | 39.784074117 |
| 1 | 32.125915258 | 26.606658994 | 38.714080889 |
| 6 | 36.696724292 | 35.007264688 | 41.779421153 |
| 1 | 36.771266575 | 36.050678173 | 41.456343932 |
| 1 | 36.390017281 | 34.989507944 | 42.835803915 |
| 7 | 35.731740653 | 34.304928626 | 40.948552847 |
| 1 | 35.541108767 | 33.314634037 | 41.138197728 |
| 6 | 34.893529982 | 34.875170802 | 40.079932523 |
| 7 | 34.872686627 | 36.211709128 | 39.905140156 |
| 1 | 35.104698925 | 36.787721299 | 40.717644640 |
| 1 | 34.142462674 | 36.606520092 | 39.320121456 |
| 7 | 34.086286414 | 34.098755290 | 39.345538395 |
| 1 | 34.089931810 | 33.084061910 | 39.466817211 |
| 1 | 33.466841549 | 34.495809437 | 38.651027441 |
| 6 | 33.396570482 | 31.315584496 | 37.051709646 |
| 8 | 33.842184442 | 32.005811126 | 36.168867494 |
| 8 | 32.808327601 | 31.564875744 | 38.142388984 |
| 6 | 33.614495453 | 29.578637309 | 36.954100495 |
| 8 | 32.546163566 | 29.060863237 | 37.508446695 |
| 6 | 34.075744536 | 29.123473759 | 35.581480160 |
| 6 | 34.329980665 | 27.614668156 | 35.524546800 |
| 6 | 34.853349537 | 27.131649631 | 34.152607214 |
| 8 | 34.239775555 | 27.542522834 | 33.136010855 |

|    |              |              |              |
|----|--------------|--------------|--------------|
| 8  | 35.830788061 | 26.343235591 | 34.168849548 |
| 1  | 33.384690040 | 27.077952317 | 35.728510704 |
| 1  | 35.055068190 | 27.320244624 | 36.298602414 |
| 1  | 34.991493396 | 29.672023436 | 35.324561383 |
| 1  | 33.315790491 | 29.412564089 | 34.842252527 |
| 26 | 32.414498589 | 29.883983504 | 39.333449246 |
| 8  | 34.374697878 | 29.519585954 | 39.140561720 |
| 8  | 34.757110056 | 29.572929688 | 37.849635753 |
| 8  | 28.855903046 | 33.332660286 | 37.913313842 |
| 6  | 28.101679069 | 33.599635595 | 38.814746679 |
| 7  | 28.584568422 | 33.997992613 | 40.087892794 |
| 6  | 30.049994080 | 34.001480785 | 40.275191276 |
| 6  | 27.775294248 | 34.342410922 | 41.134964947 |
| 7  | 28.275292430 | 34.789889565 | 42.262252762 |
| 6  | 26.361250494 | 34.178931470 | 40.970472485 |
| 6  | 25.869553102 | 33.806874979 | 39.765828339 |
| 7  | 26.692000192 | 33.547610153 | 38.698700172 |
| 1  | 30.426025322 | 35.028723185 | 40.369317293 |
| 1  | 30.504911219 | 33.516514549 | 39.406631639 |
| 1  | 29.249838873 | 35.111487169 | 42.447004224 |
| 1  | 24.793012026 | 33.727269358 | 39.640584822 |
| 1  | 25.682033254 | 34.415856994 | 41.787189030 |
| 1  | 30.289866053 | 33.443140065 | 41.191096958 |
| 1  | 27.642753497 | 35.009869314 | 43.022576607 |
| 1  | 27.142243373 | 30.007182524 | 40.228659197 |
| 1  | 32.453034610 | 31.683229268 | 43.739169498 |
| 1  | 31.324734717 | 24.828526095 | 40.696879032 |
| 1  | 37.708083394 | 34.613833860 | 41.677282694 |
| 1  | 26.317123970 | 33.215144645 | 37.833306041 |

**IMI**

**QM/MM (BS1) = -3425.120278 a.u.**

**QM/MM (BS2+ZPE) = -3427.118763 a.u.**

|   |              |              |              |
|---|--------------|--------------|--------------|
| 6 | 28.017477767 | 29.968887739 | 39.673237153 |
| 7 | 28.174057965 | 29.196111994 | 38.543741140 |
| 1 | 27.423593041 | 28.704850771 | 38.045007342 |
| 6 | 29.482275730 | 29.205932761 | 38.217188982 |
| 1 | 29.906010666 | 28.661892945 | 37.376693884 |
| 7 | 30.176721390 | 29.947468708 | 39.066204469 |
| 6 | 29.277337881 | 30.424743390 | 39.989417427 |
| 1 | 29.612008327 | 31.028344022 | 40.829505487 |
| 6 | 33.381126497 | 31.562096807 | 43.261874480 |
| 1 | 33.857799012 | 30.680996340 | 43.726917929 |
| 1 | 34.057973610 | 32.407626042 | 43.461111858 |
| 6 | 33.359619877 | 31.322764003 | 41.745476819 |
| 8 | 32.274298839 | 30.915579472 | 41.191084443 |
| 8 | 34.428800532 | 31.490044038 | 41.134958481 |
| 6 | 31.735064683 | 25.989375003 | 40.732212286 |
| 7 | 31.663169265 | 26.717057756 | 41.899884739 |
| 1 | 31.406893914 | 26.369393511 | 42.831376173 |
| 6 | 31.993667154 | 27.989051794 | 41.604133136 |
| 1 | 32.005724685 | 28.808663113 | 42.314312061 |
| 7 | 32.280362809 | 28.122039577 | 40.317126446 |
| 6 | 32.121064295 | 26.877847125 | 39.755377004 |
| 1 | 32.281485278 | 26.718379646 | 38.691352927 |
| 6 | 36.635798835 | 34.781198897 | 41.874251652 |

|    |              |              |              |    |              |              |              |
|----|--------------|--------------|--------------|----|--------------|--------------|--------------|
| 1  | 36.643789554 | 35.834747534 | 41.579253699 | 6  | 33.357212676 | 31.567515571 | 43.259222979 |
| 1  | 36.349071683 | 34.720954639 | 42.934779434 | 1  | 33.841239887 | 30.696830266 | 43.736518421 |
| 7  | 35.697741211 | 34.051696600 | 41.033910746 | 1  | 34.024549728 | 32.422526112 | 43.448975257 |
| 1  | 35.559353148 | 33.042432732 | 41.180433952 | 6  | 33.353817824 | 31.304806838 | 41.745721293 |
| 6  | 34.820280394 | 34.616460368 | 40.195869718 | 8  | 32.294497154 | 30.818865667 | 41.197033644 |
| 7  | 34.689128745 | 35.953842737 | 40.116198866 | 8  | 34.417303759 | 31.510275072 | 41.144371581 |
| 1  | 34.913195780 | 36.524736114 | 40.933657804 | 6  | 31.772013828 | 25.996919991 | 40.703267455 |
| 1  | 33.984841368 | 36.345560761 | 39.499578664 | 7  | 31.693563375 | 26.720732881 | 41.873909042 |
| 7  | 34.089152453 | 33.840645658 | 39.391108600 | 1  | 31.431753476 | 26.370480917 | 42.802943685 |
| 1  | 34.191700585 | 32.822514065 | 39.372221412 | 6  | 32.030200313 | 27.992044185 | 41.586875798 |
| 1  | 33.338817760 | 34.228421375 | 38.831083318 | 1  | 32.038471326 | 28.809881374 | 42.298648123 |
| 6  | 31.769979671 | 33.339938087 | 36.584507012 | 7  | 32.327707085 | 28.130096459 | 40.302151534 |
| 8  | 31.833002839 | 32.746581522 | 35.589454057 | 6  | 32.169716630 | 26.888090505 | 39.733498774 |
| 8  | 31.698985388 | 33.983783675 | 37.553925632 | 1  | 32.342947813 | 26.734755549 | 38.670426592 |
| 6  | 33.489443011 | 29.561239157 | 36.674551553 | 6  | 36.634746333 | 34.780160112 | 41.869343068 |
| 8  | 32.704356147 | 28.952744954 | 37.406940693 | 1  | 36.641039991 | 35.840761475 | 41.602511070 |
| 6  | 34.103185641 | 29.039585523 | 35.408840988 | 1  | 36.344745035 | 34.693350986 | 42.927256502 |
| 6  | 34.409649808 | 27.544043573 | 35.428771158 | 7  | 35.699879458 | 34.069558607 | 41.009370834 |
| 6  | 34.960291539 | 27.057774672 | 34.069793097 | 1  | 35.541851520 | 33.063121483 | 41.153421634 |
| 8  | 34.324147142 | 27.437968363 | 33.052998529 | 6  | 34.849757371 | 34.651058850 | 40.153491431 |
| 8  | 35.970695667 | 26.315659419 | 34.090409318 | 7  | 34.748017176 | 35.993130126 | 40.075482413 |
| 1  | 33.478891767 | 26.984135614 | 35.632663173 | 1  | 34.949402701 | 36.552820143 | 40.906442229 |
| 1  | 35.131406130 | 27.296771850 | 36.221775270 | 1  | 34.057966895 | 36.394196670 | 39.448831371 |
| 1  | 35.006306184 | 29.621001732 | 35.179949417 | 7  | 34.119222850 | 33.896350570 | 39.331471499 |
| 1  | 33.398505345 | 29.251389029 | 34.587179186 | 1  | 34.169686918 | 32.871762708 | 39.305405889 |
| 26 | 32.315151667 | 30.069795512 | 39.313255159 | 1  | 33.379254776 | 34.306526185 | 38.772835857 |
| 8  | 33.246185225 | 31.362430812 | 38.103860906 | 6  | 31.166333191 | 33.793831278 | 36.744236164 |
| 8  | 33.876757968 | 30.798019751 | 36.949456785 | 8  | 30.728549129 | 33.304246076 | 35.788495189 |
| 8  | 28.810135871 | 33.272240865 | 38.025732733 | 8  | 31.609586586 | 34.305338696 | 37.692968446 |
| 6  | 28.042755024 | 33.569855748 | 38.907848219 | 6  | 33.504336053 | 29.670799814 | 36.673550641 |
| 7  | 28.503050006 | 33.992313864 | 40.179841230 | 8  | 32.793648473 | 28.999425150 | 37.471348284 |
| 6  | 29.963431282 | 33.995641277 | 40.404105490 | 6  | 34.049578642 | 29.084894356 | 35.387369060 |
| 6  | 27.677116162 | 34.370373124 | 41.201650927 | 6  | 34.370291758 | 27.593807782 | 35.437190548 |
| 7  | 28.161861715 | 34.847259713 | 42.324436417 | 6  | 34.915717707 | 27.082620004 | 34.084390266 |
| 6  | 26.265502179 | 34.210360439 | 41.013176190 | 8  | 34.294552269 | 27.462592690 | 33.058070899 |
| 6  | 25.794981878 | 33.819785099 | 39.805610334 | 8  | 35.912379297 | 26.321419174 | 34.116624151 |
| 7  | 26.636119884 | 33.532978867 | 38.759811567 | 1  | 33.449394389 | 27.028565802 | 35.669383555 |
| 1  | 30.329508620 | 35.023934174 | 40.519567023 | 1  | 35.103673713 | 27.372554552 | 36.227235580 |
| 1  | 30.442377761 | 33.536614040 | 39.537469459 | 1  | 34.934273190 | 29.662130837 | 35.088270893 |
| 1  | 29.138817957 | 35.155889410 | 42.519806044 | 1  | 33.300318845 | 29.274916742 | 34.601665085 |
| 1  | 24.720542678 | 33.747085908 | 39.661168600 | 26 | 32.314535477 | 30.085293118 | 39.260689041 |
| 1  | 25.570930803 | 34.463899901 | 41.811830693 | 8  | 33.120153392 | 31.425990471 | 38.413717443 |
| 1  | 30.184978491 | 33.422119128 | 41.315115584 | 8  | 33.818759659 | 30.895303532 | 36.863257002 |
| 1  | 27.516140570 | 35.101000971 | 43.062758687 | 8  | 28.806169127 | 33.289533022 | 38.142042791 |
| 1  | 27.082432262 | 30.013674561 | 40.231584150 | 6  | 28.018283047 | 33.587830418 | 39.007169471 |
| 1  | 32.436649705 | 31.734176326 | 43.778032932 | 7  | 28.453918465 | 34.007634789 | 40.285966484 |
| 1  | 31.390772587 | 24.957585187 | 40.661926864 | 6  | 29.910700605 | 34.002830219 | 40.542278676 |
| 1  | 37.667512872 | 34.454640860 | 41.743893224 | 6  | 27.606907454 | 34.410984748 | 41.281292892 |
| 1  | 26.279507564 | 33.200773408 | 37.886633646 | 7  | 28.068836430 | 34.909607424 | 42.404174555 |

**TS2**

**QM/MM (BS1) = -3425.105649 a.u.**

**QM/MM (BS2+ZPE) = -3427.116983 a.u.**

|   |              |              |              |   |              |              |              |
|---|--------------|--------------|--------------|---|--------------|--------------|--------------|
| 6 | 28.028933925 | 29.971653924 | 39.671382445 | 1 | 29.047154213 | 35.208734606 | 42.613438550 |
| 7 | 28.190129475 | 29.216515751 | 38.530236712 | 1 | 24.682926605 | 33.774675152 | 39.684108089 |
| 1 | 27.441238155 | 28.726152679 | 38.026688919 | 1 | 25.487478185 | 34.510336146 | 41.843734900 |
| 6 | 29.495659205 | 29.237984361 | 38.201276003 | 1 | 30.091694248 | 33.538581558 | 41.520794890 |
| 1 | 29.924697163 | 28.711214884 | 37.352657706 | 1 | 27.404885636 | 35.186634328 | 43.117412097 |
| 7 | 30.184640538 | 29.970224790 | 39.065841464 | 1 | 27.090566082 | 30.010466768 | 40.224579224 |
| 6 | 29.284527659 | 30.428161409 | 39.999058264 | 1 | 32.411673735 | 31.734895171 | 43.774982130 |
| 1 | 29.617078761 | 31.021265985 | 40.847208175 | 1 | 31.426092883 | 24.965827107 | 40.630786465 |

|   |              |              |              |
|---|--------------|--------------|--------------|
| 1 | 37.668072594 | 34.460198962 | 41.735443761 |
| 1 | 26.280953937 | 33.221363314 | 37.941572711 |

**IM2**

**QM/MM (BS1) = -3425.110527 a.u.**  
**QM/MM (BS2+ZPE) = -3427.123113 a.u.**

|    |              |              |              |
|----|--------------|--------------|--------------|
| 6  | 28.042722675 | 29.955511864 | 39.676054530 |
| 7  | 28.199973241 | 29.204414827 | 38.532449239 |
| 1  | 27.447327403 | 28.726927622 | 38.022070620 |
| 6  | 29.506868931 | 29.208919888 | 38.210028680 |
| 1  | 29.930569576 | 28.686669833 | 37.356060760 |
| 7  | 30.198730829 | 29.925211735 | 39.084787830 |
| 6  | 29.301511587 | 30.393204881 | 40.013996668 |
| 1  | 29.634371977 | 30.983184083 | 40.863980919 |
| 6  | 33.404204864 | 31.523283598 | 43.238113305 |
| 1  | 33.871644978 | 30.642950936 | 43.714174245 |
| 1  | 34.079255437 | 32.369090699 | 43.438477433 |
| 6  | 33.411205668 | 31.274548076 | 41.724354603 |
| 8  | 32.367826066 | 30.740154198 | 41.180733757 |
| 8  | 34.449849165 | 31.529499139 | 41.104881485 |
| 6  | 31.767323143 | 25.967597428 | 40.672308665 |
| 7  | 31.689537516 | 26.689115007 | 41.843575972 |
| 1  | 31.438880006 | 26.336809670 | 42.774752413 |
| 6  | 32.006740335 | 27.964342333 | 41.553593010 |
| 1  | 32.017729547 | 28.777407317 | 42.269660804 |
| 7  | 32.290460188 | 28.108771912 | 40.266637327 |
| 6  | 32.146104989 | 26.865224973 | 39.699502051 |
| 1  | 32.321512579 | 26.711366682 | 38.636710593 |
| 6  | 36.635259968 | 34.827604747 | 41.835924535 |
| 1  | 36.658586652 | 35.885322570 | 41.557549774 |
| 1  | 36.341360105 | 34.755882301 | 42.894125466 |
| 7  | 35.691589245 | 34.123154679 | 40.980817260 |
| 1  | 35.545809687 | 33.115231382 | 41.115072973 |
| 6  | 34.823582471 | 34.710847983 | 40.146755402 |
| 7  | 34.742425609 | 36.053859767 | 40.059952415 |
| 1  | 34.970055283 | 36.610791616 | 40.885893366 |
| 1  | 34.026162200 | 36.457686747 | 39.464320786 |
| 7  | 34.054259617 | 33.963405535 | 39.355179110 |
| 1  | 34.070450536 | 32.940381196 | 39.350905565 |
| 1  | 33.312199658 | 34.380456152 | 38.802930781 |
| 6  | 31.163793961 | 33.884937206 | 36.805513440 |
| 8  | 30.768126899 | 33.329860007 | 35.867368380 |
| 8  | 31.557210770 | 34.475493015 | 37.730512154 |
| 6  | 33.629340425 | 29.781322615 | 36.730178417 |
| 8  | 33.006050040 | 29.106284156 | 37.631238566 |
| 6  | 34.108940010 | 29.096225729 | 35.461114148 |
| 6  | 34.368688817 | 27.595746391 | 35.528501347 |
| 6  | 34.879150125 | 27.055422278 | 34.170527897 |
| 8  | 34.250020575 | 27.435567470 | 33.149381216 |
| 8  | 35.863716898 | 26.277102448 | 34.192994260 |
| 1  | 33.431776094 | 27.063940894 | 35.778113657 |
| 1  | 35.105176407 | 27.352948958 | 36.309634558 |
| 1  | 35.009018217 | 29.623026581 | 35.116665602 |
| 1  | 33.349669937 | 29.303961926 | 34.688523085 |
| 26 | 32.307273662 | 30.140061286 | 39.241793185 |
| 8  | 32.715033377 | 31.656511326 | 38.457953311 |
| 8  | 33.856032455 | 31.010487157 | 36.810027306 |
| 8  | 28.804724610 | 33.258911218 | 38.165530731 |
| 6  | 28.016350011 | 33.576760892 | 39.022391413 |
| 7  | 28.450716524 | 34.005181851 | 40.299162434 |
| 6  | 29.907575533 | 33.996147308 | 40.556975166 |

|   |              |              |              |
|---|--------------|--------------|--------------|
| 6 | 27.602516886 | 34.422815902 | 41.287173501 |
| 7 | 28.062324115 | 34.926824904 | 42.408732268 |
| 6 | 26.195136739 | 34.269516206 | 41.065380811 |
| 6 | 25.750497508 | 33.863042349 | 39.853186163 |
| 7 | 26.615083369 | 33.551796077 | 38.833540489 |
| 1 | 30.311642855 | 35.016058868 | 40.524206966 |
| 1 | 30.394047061 | 33.392500125 | 39.787741262 |
| 1 | 29.042501094 | 35.219208865 | 42.619160612 |
| 1 | 24.679214226 | 33.796007128 | 39.685206577 |
| 1 | 25.482489414 | 34.539004768 | 41.842663449 |
| 1 | 30.082000329 | 33.564329465 | 41.551286771 |
| 1 | 27.395631527 | 35.219082466 | 43.113216822 |
| 1 | 27.106115595 | 30.000154929 | 40.231789619 |
| 1 | 32.455958875 | 31.698107885 | 43.746378327 |
| 1 | 31.420671705 | 24.936327348 | 40.606111041 |
| 1 | 37.664211701 | 34.491097590 | 41.709083728 |
| 1 | 26.281385323 | 33.227477322 | 37.948421593 |

**IM3**

**QM/MM (BS1) = -3425.123364 a.u.**  
**QM/MM (BS2+ZPE) = -3427.140790 a.u.**

|   |              |              |              |
|---|--------------|--------------|--------------|
| 6 | 28.275017068 | 29.882160145 | 39.668316371 |
| 7 | 28.435021492 | 29.170442881 | 38.498961352 |
| 1 | 27.679077753 | 28.723743277 | 37.967429052 |
| 6 | 29.751003262 | 29.159773064 | 38.200186660 |
| 1 | 30.184585318 | 28.683564664 | 37.324483008 |
| 7 | 30.447545124 | 29.817617036 | 39.118501638 |
| 6 | 29.540252040 | 30.272363774 | 40.045369761 |
| 1 | 29.873994659 | 30.831184586 | 40.915043640 |
| 6 | 33.388825296 | 31.416719079 | 43.112141941 |
| 1 | 33.763347483 | 30.443214301 | 43.474527803 |
| 1 | 34.131754746 | 32.173439757 | 43.400452291 |
| 6 | 33.350225118 | 31.386690874 | 41.577866360 |
| 8 | 32.378204422 | 30.742021124 | 40.997015969 |
| 8 | 34.264797056 | 31.936271314 | 40.970133632 |
| 6 | 31.722825538 | 25.771306536 | 40.741430676 |
| 7 | 31.667513005 | 26.518992543 | 41.895148926 |
| 1 | 31.417010106 | 26.193431492 | 42.836615869 |
| 6 | 31.992269951 | 27.784875129 | 41.573355642 |
| 1 | 32.031318665 | 28.615927561 | 42.268858206 |
| 7 | 32.252418635 | 27.886177588 | 40.280227922 |
| 6 | 32.093374519 | 26.637702394 | 39.740440812 |
| 1 | 32.245360951 | 26.447174904 | 38.679745858 |
| 6 | 36.721373691 | 35.014519872 | 41.722714656 |
| 1 | 36.781176012 | 36.061104288 | 41.405883257 |
| 1 | 36.392743491 | 34.983783903 | 42.772473733 |
| 7 | 35.793302372 | 34.298809125 | 40.862245636 |
| 1 | 35.610686082 | 33.307387076 | 41.042298380 |
| 6 | 34.975989175 | 34.856459486 | 39.963600472 |
| 7 | 34.871841822 | 36.194780742 | 39.860944716 |
| 1 | 35.022814255 | 36.751500482 | 40.705169366 |
| 1 | 34.205134189 | 36.585684421 | 39.203518662 |
| 7 | 34.294305615 | 34.069847475 | 39.124236946 |
| 1 | 34.337739763 | 33.056597505 | 39.241907683 |
| 1 | 33.525366536 | 34.432955991 | 38.572170204 |
| 6 | 31.093919338 | 33.787135265 | 36.700336011 |
| 8 | 30.529729569 | 33.471387049 | 35.738771826 |
| 8 | 31.665165517 | 34.111007977 | 37.663928744 |
| 6 | 33.500725683 | 30.151705874 | 36.660875856 |
| 8 | 32.612426438 | 29.521699123 | 37.417658495 |
| 6 | 33.913143036 | 29.438050477 | 35.385222093 |



|    |              |              |              |    |              |              |              |
|----|--------------|--------------|--------------|----|--------------|--------------|--------------|
| 6  | 34.330026418 | 27.973721656 | 35.543337376 | 1  | 36.676690964 | 35.853773182 | 41.367375917 |
| 6  | 34.772734183 | 27.315453987 | 34.212523668 | 1  | 36.347304199 | 34.801336092 | 42.767958047 |
| 8  | 34.142503236 | 27.647380089 | 33.176302241 | 7  | 35.768084023 | 34.037773015 | 40.873160621 |
| 8  | 35.705450800 | 26.475541080 | 34.271662078 | 1  | 35.683480895 | 33.028528156 | 41.023893310 |
| 1  | 33.478874198 | 27.385849236 | 35.936607360 | 6  | 34.855268107 | 34.556945475 | 40.038432438 |
| 1  | 35.149576738 | 27.872227105 | 36.272266098 | 7  | 34.628836586 | 35.881270994 | 39.999946403 |
| 1  | 34.731020929 | 30.017860395 | 34.941026953 | 1  | 34.840547655 | 36.458204537 | 40.816156647 |
| 1  | 33.079092994 | 29.492792059 | 34.668957222 | 1  | 33.935343398 | 36.254887351 | 39.360523631 |
| 26 | 32.597728106 | 29.746739326 | 39.302842851 | 7  | 34.193099825 | 33.750645663 | 39.204405521 |
| 8  | 34.200610666 | 29.648999547 | 39.430065174 | 1  | 34.341098409 | 32.741992746 | 39.215941649 |
| 8  | 33.939679201 | 31.257915691 | 36.955965771 | 1  | 33.363703601 | 34.072210675 | 38.714460140 |
| 8  | 28.774403368 | 33.277302519 | 38.200800035 | 6  | 31.101084303 | 33.952784164 | 36.806595020 |
| 6  | 27.980939020 | 33.598203784 | 39.053133336 | 8  | 30.618892273 | 33.464108533 | 35.872295714 |
| 7  | 28.410824752 | 34.012808867 | 40.335290561 | 8  | 31.597053997 | 34.463284393 | 37.730436207 |
| 6  | 29.865729620 | 33.987098144 | 40.598169244 | 6  | 33.784766715 | 29.916332803 | 36.920628304 |
| 6  | 27.561216189 | 34.438311471 | 41.318761022 | 8  | 32.945854820 | 29.310421439 | 37.756007046 |
| 7  | 28.020092013 | 34.928086690 | 42.447276026 | 6  | 34.015628508 | 29.229244157 | 35.581916604 |
| 6  | 26.154159073 | 34.307816007 | 41.083944773 | 6  | 34.372099644 | 27.741466100 | 35.636562844 |
| 6  | 25.713684589 | 33.913134008 | 39.866302927 | 6  | 34.805534404 | 27.170607707 | 34.261869235 |
| 7  | 26.581945501 | 33.593886460 | 38.852309252 | 8  | 34.156753487 | 27.549588070 | 32.254398754 |
| 1  | 30.284302357 | 35.001051210 | 40.557189107 | 8  | 35.759766791 | 26.352898749 | 34.268611313 |
| 1  | 30.341992398 | 33.366675175 | 39.836006429 | 1  | 33.497811779 | 27.158043600 | 35.983137154 |
| 1  | 29.004467955 | 35.202379690 | 42.663995117 | 1  | 35.187207903 | 27.555630628 | 36.353950872 |
| 1  | 24.642794808 | 33.863042566 | 39.690795032 | 1  | 34.817017884 | 29.787341689 | 35.080150292 |
| 1  | 25.438583763 | 34.582725228 | 41.856681724 | 1  | 33.114903313 | 29.359891760 | 34.960439804 |
| 1  | 30.031557227 | 33.562853278 | 41.596879847 | 26 | 32.186629537 | 30.119323386 | 39.289955866 |
| 1  | 27.350079156 | 35.236839289 | 43.141492588 | 8  | 32.101634696 | 31.626173668 | 38.712417071 |
| 1  | 27.318244842 | 29.963976191 | 40.184029827 | 8  | 34.349871364 | 30.962254223 | 37.200100927 |
| 1  | 32.456874478 | 31.620067592 | 43.639573810 | 8  | 28.760492986 | 33.298961844 | 38.161006742 |
| 1  | 31.347468600 | 24.750322863 | 40.672388428 | 6  | 27.971108118 | 33.591715954 | 39.025536531 |
| 1  | 37.739325972 | 34.634857750 | 41.634981275 | 7  | 28.407436498 | 34.005208410 | 40.305862734 |
| 1  | 26.254820694 | 33.277070284 | 37.962034371 | 6  | 29.866363944 | 33.985966044 | 40.555185875 |

#### IM4

QM/MM (BS1) = -3425.131228 a.u.

QM/MM (BS2+ZPE) = -3427.147412 a.u.

|   |              |              |              |   |              |              |              |
|---|--------------|--------------|--------------|---|--------------|--------------|--------------|
| 6 | 27.926273337 | 29.928082622 | 39.667485124 | 1 | 29.005912858 | 35.227638151 | 42.612964592 |
| 7 | 28.088178911 | 29.147615471 | 38.545616243 | 1 | 24.635283105 | 33.788256142 | 39.698115782 |
| 1 | 27.335142371 | 28.677172896 | 38.030146066 | 1 | 25.441301919 | 34.538767808 | 41.852336634 |
| 6 | 29.401366704 | 29.116080994 | 38.247737861 | 1 | 30.037472048 | 33.624347003 | 41.576998065 |
| 1 | 29.826835584 | 28.576328048 | 37.405738280 | 1 | 27.358804108 | 35.232307320 | 43.116463721 |
| 7 | 30.089098533 | 29.834539489 | 39.120272752 | 1 | 26.991869170 | 29.974703038 | 40.226754926 |
| 6 | 29.188199085 | 30.349618065 | 40.016128829 | 1 | 32.461305137 | 31.679260746 | 43.707413265 |
| 1 | 29.515457250 | 30.962357381 | 40.851670187 | 1 | 31.392332930 | 24.975171932 | 40.543019307 |
| 6 | 33.401950971 | 31.490220148 | 43.190193400 | 1 | 37.705161262 | 34.488895535 | 41.634045367 |
| 1 | 33.869869863 | 30.612688792 | 43.670655073 | 1 | 26.236014163 | 33.225170808 | 37.957493575 |
| 1 | 34.085821029 | 32.333655455 | 43.370504055 |   |              |              |              |
| 6 | 33.389206780 | 31.224438896 | 41.679801466 |   |              |              |              |
| 8 | 32.319077009 | 30.702793569 | 41.169807692 |   |              |              |              |
| 8 | 34.416419350 | 31.444548818 | 41.035091785 |   |              |              |              |
| 6 | 31.713376411 | 26.014727980 | 40.608758420 |   |              |              |              |
| 7 | 31.644623063 | 26.714642596 | 41.793709367 |   |              |              |              |
| 1 | 31.423942037 | 26.340962410 | 42.724615176 |   |              |              |              |
| 6 | 31.920426720 | 28.000864813 | 41.521756172 |   |              |              |              |
| 1 | 31.931200092 | 28.800779742 | 42.250636300 |   |              |              |              |
| 7 | 32.169095248 | 28.173110484 | 40.229841093 |   |              |              |              |
| 6 | 32.045583760 | 26.936495972 | 39.641307392 |   |              |              |              |
| 1 | 32.205489472 | 26.805232032 | 38.573092634 |   |              |              |              |
| 6 | 36.668288974 | 34.815111047 | 41.714956574 |   |              |              |              |

#### 2OG rearrangement reaction state coordinates for AlkB-ssDNA

#### ES1

QM/MM (BS1) = -3274.903190 a.u.

QM/MM (BS2+ZPE) = -3276.725383 a.u.

|   |              |              |              |
|---|--------------|--------------|--------------|
| 6 | 27.983339902 | 29.969201568 | 39.678452190 |
| 7 | 28.130917065 | 29.212825708 | 38.536962528 |
| 1 | 27.375018650 | 28.736202417 | 38.031870792 |
| 6 | 29.438112714 | 29.212719608 | 38.209079748 |

|    |              |              |              |
|----|--------------|--------------|--------------|
| 1  | 29.849197149 | 28.678474190 | 37.356149403 |
| 7  | 30.141654454 | 29.931236159 | 39.070470908 |
| 6  | 29.247704918 | 30.406418225 | 40.000799257 |
| 1  | 29.590367751 | 30.991441957 | 40.850637265 |
| 6  | 33.323595061 | 31.624227259 | 43.269676188 |
| 1  | 33.830113279 | 30.760131427 | 43.734927227 |
| 1  | 33.983647919 | 32.488780961 | 43.442463704 |
| 6  | 33.267152630 | 31.357447560 | 41.760802078 |
| 8  | 32.179316275 | 30.911652379 | 41.245577666 |
| 8  | 34.312589048 | 31.535702499 | 41.108905148 |
| 6  | 31.727974734 | 25.988192493 | 40.762277973 |
| 7  | 31.647299260 | 26.710046586 | 41.933057803 |
| 1  | 31.388743452 | 26.357253035 | 42.862378424 |
| 6  | 31.970135832 | 27.984842792 | 41.646596843 |
| 1  | 31.972415998 | 28.800553138 | 42.361577347 |
| 7  | 32.260989360 | 28.125578201 | 40.360474059 |
| 6  | 32.113280172 | 26.882625787 | 39.791317828 |
| 1  | 32.284524205 | 26.728147480 | 38.728244085 |
| 6  | 36.621504196 | 34.732669618 | 41.899836552 |
| 1  | 36.630772937 | 35.802219422 | 41.679010177 |
| 1  | 36.334876101 | 34.605489291 | 42.953914028 |
| 7  | 35.675302222 | 34.058638897 | 41.021455358 |
| 1  | 35.484888510 | 33.056574026 | 41.160426512 |
| 6  | 34.867018900 | 34.664076277 | 40.144174319 |
| 7  | 34.853555128 | 36.004684124 | 40.007689595 |
| 1  | 35.098246953 | 36.576772536 | 40.819006537 |
| 1  | 34.144302301 | 36.419052469 | 39.411191533 |
| 7  | 34.071576752 | 33.919979080 | 39.365275034 |
| 1  | 34.091584552 | 32.898658311 | 39.386825222 |
| 1  | 33.531833601 | 34.342730588 | 38.620352761 |
| 6  | 33.522005081 | 31.157007908 | 36.987349300 |
| 8  | 34.024224495 | 31.928388779 | 36.184258884 |
| 8  | 33.022119793 | 31.449463271 | 38.136912841 |
| 6  | 33.458551468 | 29.625827288 | 36.672518767 |
| 8  | 32.854687931 | 28.922125816 | 37.484336310 |
| 6  | 34.117952253 | 29.098415978 | 35.447525385 |
| 6  | 34.321146638 | 27.587496470 | 35.412351788 |
| 6  | 34.906316010 | 27.108581355 | 34.066305157 |
| 8  | 34.301192428 | 27.504207665 | 33.036848145 |
| 8  | 35.908135555 | 26.354628915 | 34.104323928 |
| 1  | 33.348875245 | 27.080608209 | 35.552569397 |
| 1  | 34.984605265 | 27.267821330 | 36.230713656 |
| 1  | 35.069054398 | 29.634368241 | 35.304350161 |
| 1  | 33.514795088 | 29.428468887 | 34.578699735 |
| 26 | 32.261095571 | 30.067525230 | 39.371812686 |
| 8  | 28.875921784 | 33.315765619 | 37.872583466 |
| 6  | 28.131724695 | 33.578583606 | 38.784061739 |
| 7  | 28.626845054 | 33.980329586 | 40.050917211 |
| 6  | 30.094445509 | 33.988412266 | 40.225137004 |
| 6  | 27.827742322 | 34.313614102 | 41.109513284 |
| 7  | 28.339118536 | 34.759046791 | 42.232043874 |
| 6  | 26.412005942 | 34.144667571 | 40.960218755 |
| 6  | 25.908826664 | 33.772743221 | 39.760260331 |
| 7  | 26.721111233 | 33.519462013 | 38.683507811 |
| 1  | 30.455417017 | 35.011085866 | 40.394961540 |
| 1  | 30.545011827 | 33.581561096 | 39.315860214 |
| 1  | 29.311533468 | 35.090273474 | 42.405940144 |
| 1  | 24.831469210 | 33.686786960 | 39.644504946 |
| 1  | 25.741414488 | 34.378363124 | 41.784976963 |
| 1  | 30.357011062 | 33.358085892 | 41.086916463 |
| 1  | 27.720211897 | 34.965486763 | 43.007557572 |
| 1  | 27.051524321 | 30.011506696 | 40.242364697 |

|   |              |              |              |
|---|--------------|--------------|--------------|
| 1 | 32.385050981 | 31.778723631 | 43.801966709 |
| 1 | 31.384587421 | 24.956632181 | 40.684587578 |
| 1 | 37.655313966 | 34.421217273 | 41.750497647 |
| 1 | 26.336326732 | 33.184835838 | 37.823310910 |

**TS for 2OG rearrangement**

**QM/MM (BS1) = -3274.893943 a.u.**

**QM/MM (BS2+ZPE) = -3276.718908 a.u.**

|    |              |              |              |
|----|--------------|--------------|--------------|
| 6  | 27.926032218 | 29.906776549 | 39.703487306 |
| 7  | 28.092383081 | 29.149112873 | 38.566114172 |
| 1  | 27.343258918 | 28.680929837 | 38.043448529 |
| 6  | 29.407627511 | 29.130839568 | 38.269259727 |
| 1  | 29.837712928 | 28.616943735 | 37.413196351 |
| 7  | 30.097669770 | 29.829596788 | 39.158225371 |
| 6  | 29.186712356 | 30.322930783 | 40.061140640 |
| 1  | 29.513411276 | 30.915052877 | 40.911876493 |
| 6  | 33.236120543 | 31.655748183 | 43.288164683 |
| 1  | 33.736029798 | 30.776771861 | 43.731992945 |
| 1  | 33.893732836 | 32.511720869 | 43.508816456 |
| 6  | 33.250813689 | 31.462093975 | 41.767530762 |
| 8  | 32.160281971 | 31.132360006 | 41.152219105 |
| 8  | 34.346708000 | 31.592991328 | 41.213161406 |
| 6  | 31.719705112 | 26.124113045 | 40.714216767 |
| 7  | 31.656901710 | 26.841179730 | 41.888513604 |
| 1  | 31.419114114 | 26.478884480 | 42.819463625 |
| 6  | 31.964139164 | 28.122517710 | 41.595225549 |
| 1  | 31.981158044 | 28.929535092 | 42.319770540 |
| 7  | 32.224619880 | 28.273973758 | 40.305786294 |
| 6  | 32.074795328 | 27.029930577 | 39.739350220 |
| 1  | 32.218310056 | 26.873512010 | 38.671804770 |
| 6  | 36.666037705 | 34.707826858 | 41.902660771 |
| 1  | 36.663897025 | 35.782566022 | 41.709261801 |
| 1  | 36.369144006 | 34.551705969 | 42.950003789 |
| 7  | 35.739604481 | 34.040908168 | 40.998728847 |
| 1  | 35.526778949 | 33.044454110 | 41.147655787 |
| 6  | 34.966848934 | 34.650040808 | 40.094285393 |
| 7  | 34.942866262 | 35.993819956 | 39.983592165 |
| 1  | 35.139072506 | 36.555276605 | 40.815479327 |
| 1  | 34.273373664 | 36.414197342 | 39.347603880 |
| 7  | 34.214347916 | 33.912832356 | 39.266083558 |
| 1  | 34.284585988 | 32.888487636 | 39.208980253 |
| 1  | 33.713521497 | 34.367912492 | 38.512569769 |
| 6  | 33.855055112 | 31.079989292 | 37.116146184 |
| 8  | 34.270916430 | 31.939253947 | 36.352147441 |
| 8  | 33.729399212 | 31.158193043 | 38.397290157 |
| 6  | 33.367017304 | 29.719715398 | 36.577385773 |
| 8  | 32.431708057 | 29.202257186 | 37.194040393 |
| 6  | 34.040355125 | 29.138933519 | 35.379236966 |
| 6  | 34.228203274 | 27.620651018 | 35.402151753 |
| 6  | 34.826112229 | 27.107475184 | 34.070649284 |
| 8  | 34.254963223 | 27.516601097 | 33.027390345 |
| 8  | 35.801816490 | 26.324166647 | 34.134923100 |
| 1  | 33.250178555 | 27.127027924 | 35.547998856 |
| 1  | 34.888451717 | 27.321868716 | 36.231567139 |
| 1  | 35.002042762 | 29.648633351 | 35.228589829 |
| 1  | 33.436627676 | 29.413640483 | 34.493631333 |
| 26 | 32.167143299 | 30.301109810 | 39.298965103 |
| 8  | 28.875590800 | 33.263407325 | 37.916438173 |
| 6  | 28.125125580 | 33.553877342 | 38.815828609 |
| 7  | 28.613131839 | 33.986298663 | 40.074886205 |
| 6  | 30.080016285 | 34.023167797 | 40.248275094 |

|   |              |              |              |
|---|--------------|--------------|--------------|
| 6 | 27.808959149 | 34.315313454 | 41.131614186 |
| 7 | 28.312217434 | 34.767774136 | 42.254753018 |
| 6 | 26.394842602 | 34.137600499 | 40.976832640 |
| 6 | 25.897968116 | 33.761837507 | 39.775697664 |
| 7 | 26.716096178 | 33.502482843 | 38.704217618 |
| 1 | 30.405057425 | 35.035136316 | 40.518099573 |
| 1 | 30.535988338 | 33.735308196 | 39.298311432 |
| 1 | 29.282437250 | 35.101631126 | 42.436426135 |
| 1 | 24.821323157 | 33.674789527 | 39.654845175 |
| 1 | 25.719620423 | 34.369424426 | 41.798295027 |
| 1 | 30.376647576 | 33.314065706 | 41.035029162 |
| 1 | 27.685622347 | 34.975526335 | 43.023666109 |
| 1 | 26.987155915 | 29.962481155 | 40.254373507 |
| 1 | 32.288659197 | 31.794616740 | 43.808837170 |
| 1 | 31.408293821 | 25.081622461 | 40.648614103 |
| 1 | 37.703364245 | 34.407390560 | 41.755151438 |
| 1 | 26.334680589 | 33.169716408 | 37.841801744 |

**ES2**

**QM/MM (BS1) = -3274.906024 a.u.**

**QM/MM (BS2+ZPE) = -3276.727311 a.u.**

|   |              |              |              |
|---|--------------|--------------|--------------|
| 6 | 27.923549387 | 29.907144941 | 39.708879321 |
| 7 | 28.097440809 | 29.156442941 | 38.568408595 |
| 1 | 27.352671568 | 28.684236655 | 38.043188242 |
| 6 | 29.414087479 | 29.149371159 | 38.273933749 |
| 1 | 29.849424039 | 28.646878959 | 37.413741615 |
| 7 | 30.097871773 | 29.846649303 | 39.169251716 |
| 6 | 29.180913833 | 30.329188277 | 40.071879975 |
| 1 | 29.500217056 | 30.920352174 | 40.926112885 |
| 6 | 33.213997103 | 31.676072209 | 43.301050954 |
| 1 | 33.717823539 | 30.800483383 | 43.747090059 |
| 1 | 33.864389016 | 32.536525153 | 43.527174319 |
| 6 | 33.242788039 | 31.484807485 | 41.781293927 |
| 8 | 32.153656476 | 31.171322634 | 41.151106626 |
| 8 | 34.345900761 | 31.602620925 | 41.240952340 |
| 6 | 31.718438108 | 26.144532392 | 40.711673875 |
| 7 | 31.658956114 | 26.859849437 | 41.886938979 |
| 1 | 31.422368269 | 26.496103040 | 42.817618718 |
| 6 | 31.966138951 | 28.141788128 | 41.593913305 |
| 1 | 31.985665321 | 28.946901387 | 42.320663960 |
| 7 | 32.222382736 | 28.295138397 | 40.304004792 |
| 6 | 32.070323712 | 27.051989822 | 39.737034726 |
| 1 | 32.210284347 | 26.895475967 | 38.668993649 |
| 6 | 36.693352210 | 34.712742089 | 41.910224132 |
| 1 | 36.689369723 | 35.784998232 | 41.702868932 |
| 1 | 36.395453127 | 34.568887286 | 42.958879605 |
| 7 | 35.771045722 | 34.031491983 | 41.013347162 |
| 1 | 35.559088649 | 33.037736612 | 41.175504539 |
| 6 | 35.011768627 | 34.622289202 | 40.085759061 |
| 7 | 34.979891846 | 35.964358897 | 39.957658040 |
| 1 | 35.156343735 | 36.537649870 | 40.785945495 |
| 1 | 34.323752836 | 36.371685258 | 39.300025987 |
| 7 | 34.282650279 | 33.866260922 | 39.254194067 |
| 1 | 34.359024632 | 32.841345939 | 39.223577179 |
| 1 | 33.794575286 | 34.301634513 | 38.481122035 |
| 6 | 33.902369003 | 31.056066041 | 37.153125392 |
| 8 | 34.330278168 | 31.931971145 | 36.413373021 |
| 8 | 33.807904922 | 31.082123856 | 38.438378336 |
| 6 | 33.343770335 | 29.746208926 | 36.567686393 |
| 8 | 32.381218642 | 29.261121985 | 37.168125450 |
| 6 | 33.987056858 | 29.170593379 | 35.350097651 |

|    |              |              |              |
|----|--------------|--------------|--------------|
| 6  | 34.223583218 | 27.658002692 | 35.404563997 |
| 6  | 34.808445345 | 27.126377718 | 34.073977396 |
| 8  | 34.233275661 | 27.525717799 | 33.029434721 |
| 8  | 35.777593571 | 26.335780230 | 34.143192807 |
| 1  | 33.263864698 | 27.139787562 | 35.584772267 |
| 1  | 34.909453814 | 27.397616391 | 36.225939440 |
| 1  | 34.926590627 | 29.704531736 | 35.155740463 |
| 1  | 33.338974550 | 29.398710515 | 34.484915651 |
| 26 | 32.169267940 | 30.337988511 | 39.309138509 |
| 8  | 28.862577654 | 33.270275537 | 37.918139806 |
| 6  | 28.112659423 | 33.560246768 | 38.818387906 |
| 7  | 28.601767366 | 33.995955386 | 40.075822012 |
| 6  | 30.068942494 | 34.039703528 | 40.243898904 |
| 6  | 27.798774900 | 34.320203830 | 41.134957115 |
| 7  | 28.302366197 | 34.772899112 | 42.257906730 |
| 6  | 26.384900907 | 34.138070265 | 40.982498049 |
| 6  | 25.886811530 | 33.762650662 | 39.781744980 |
| 7  | 26.703790462 | 33.506039877 | 38.708762102 |
| 1  | 30.387067129 | 35.047354199 | 40.535907821 |
| 1  | 30.522073157 | 33.779739733 | 39.284536017 |
| 1  | 29.271615808 | 35.109839311 | 42.438713948 |
| 1  | 24.810174678 | 33.673902282 | 39.662208618 |
| 1  | 25.710452919 | 34.366981426 | 41.805412990 |
| 1  | 30.376135951 | 33.313943514 | 41.011357021 |
| 1  | 27.675934832 | 34.977302461 | 43.027836031 |
| 1  | 26.982134002 | 29.959600964 | 40.255736482 |
| 1  | 32.262538145 | 31.808404151 | 43.816105737 |
| 1  | 31.410983253 | 25.100891164 | 40.645705523 |
| 1  | 37.730552081 | 34.410367944 | 41.765816286 |
| 1  | 26.322259799 | 33.172821721 | 37.846571573 |

**Substrate hydroxylation step reaction states cartesian coordinates for AlkB-ssDNA**

**Snapshot 1**

**RC2**

**QM/MM (BS1) = -3371.376168 a.u.**

**QM/MM (BS2+ZPE) = -3373.322789 a.u.**

|   |              |              |              |
|---|--------------|--------------|--------------|
| 6 | 24.428634865 | 27.784285884 | 25.352006656 |
| 7 | 25.464882364 | 26.935186433 | 25.669233319 |
| 1 | 25.770322112 | 26.126901375 | 25.114739416 |
| 6 | 25.986888664 | 27.335373828 | 26.843976580 |
| 1 | 26.824167068 | 26.847491227 | 27.335946810 |
| 7 | 25.332726321 | 28.394620090 | 27.299268218 |
| 6 | 24.367710466 | 28.700352838 | 26.374735539 |
| 1 | 23.685920774 | 29.534780946 | 26.517340087 |
| 6 | 21.983414961 | 31.225851746 | 31.109367927 |
| 1 | 21.685973611 | 30.391751729 | 31.763637021 |
| 1 | 22.003428762 | 32.161623530 | 31.680702986 |
| 6 | 23.391224478 | 31.013519856 | 30.570833115 |
| 8 | 23.611468234 | 29.844084783 | 30.022857575 |
| 8 | 24.235475649 | 31.880423074 | 30.709885333 |
| 6 | 24.293225011 | 25.212480623 | 30.263139088 |
| 7 | 23.100310497 | 25.871276479 | 30.463884477 |
| 1 | 22.270311047 | 25.471407845 | 30.906568515 |
| 6 | 23.306237669 | 27.179963439 | 30.245556300 |
| 1 | 22.558400116 | 27.956289562 | 30.363085657 |
| 7 | 24.565429735 | 27.398130905 | 29.887250364 |

|    |              |              |              |    |              |              |               |
|----|--------------|--------------|--------------|----|--------------|--------------|---------------|
| 6  | 25.199093344 | 26.175387458 | 29.896010004 | 1  | 25.708489185 | 26.068969384 | 24.978094160  |
| 1  | 26.257540908 | 26.074824196 | 29.674748608 | 6  | 26.027996888 | 27.372287132 | 26.611247035  |
| 6  | 26.168050532 | 36.182217498 | 32.207509913 | 1  | 26.904630363 | 26.916850124 | 27.064783624  |
| 1  | 26.090388484 | 36.915545948 | 31.390194482 | 7  | 25.391810744 | 28.442527115 | 27.059789186  |
| 1  | 25.252914305 | 35.579613085 | 32.224095519 | 6  | 24.344219272 | 28.677286436 | 26.206285535  |
| 7  | 27.323672915 | 35.318430563 | 32.070327495 | 1  | 23.647624989 | 29.495863975 | 26.371009120  |
| 1  | 28.240201374 | 35.688565071 | 32.347902304 | 6  | 22.139818017 | 31.309110939 | 30.820524633  |
| 6  | 27.320386549 | 34.109252749 | 31.488918743 | 1  | 21.917608299 | 30.495679717 | 31.530245147  |
| 7  | 26.245060326 | 33.644328328 | 30.857194563 | 1  | 22.207401948 | 32.254706237 | 31.369888348  |
| 1  | 25.415994695 | 34.202323342 | 30.646865503 | 6  | 23.504419386 | 31.059008906 | 30.204230457  |
| 1  | 26.167466405 | 32.655404674 | 30.626662156 | 8  | 23.633580736 | 30.049721141 | 29.400390245  |
| 7  | 28.423790891 | 33.353246064 | 31.538299399 | 8  | 24.458753517 | 31.761281838 | 30.5262853625 |
| 1  | 29.123720297 | 33.480872128 | 32.267899562 | 6  | 24.355693417 | 25.399517258 | 26.371588319  |
| 1  | 28.406081477 | 32.433668871 | 31.090907266 | 7  | 23.170352524 | 26.083075852 | 30.326561055  |
| 26 | 25.243618407 | 29.283930572 | 29.200582187 | 1  | 22.325145611 | 25.703388488 | 30.754769099  |
| 8  | 25.579203785 | 30.722488583 | 28.527218981 | 6  | 23.402529931 | 27.382484436 | 30.057897237  |
| 8  | 27.919262480 | 30.867269441 | 30.271358253 | 1  | 22.654467621 | 28.166077321 | 30.116979220  |
| 6  | 27.998521934 | 29.675394554 | 29.969719971 | 7  | 24.668040950 | 27.571569188 | 29.711055100  |
| 8  | 26.967940420 | 28.880495622 | 29.902968939 | 6  | 25.278418114 | 26.341104071 | 29.783299865  |
| 6  | 29.324256969 | 29.063228305 | 29.550372497 | 1  | 26.338143483 | 26.211590717 | 29.580453551  |
| 6  | 29.507147871 | 27.559642453 | 29.807298471 | 6  | 26.175961123 | 36.408122260 | 32.228553710  |
| 6  | 30.233750060 | 27.263985346 | 31.130147559 | 1  | 26.160215512 | 37.185212102 | 31.449707148  |
| 8  | 29.636940767 | 26.616386759 | 32.020827176 | 1  | 25.241594548 | 35.842025484 | 32.175415456  |
| 8  | 31.420558445 | 27.701658069 | 31.208066247 | 7  | 27.303029784 | 35.511401524 | 32.081161595  |
| 1  | 30.150370627 | 27.145694000 | 29.015323291 | 1  | 28.237717745 | 35.851976239 | 32.334685996  |
| 1  | 28.540126281 | 27.039132572 | 29.786897603 | 6  | 27.224843999 | 34.251569969 | 31.628789455  |
| 1  | 30.137006648 | 29.637672683 | 30.016969107 | 7  | 26.096899475 | 33.787591008 | 31.907042846  |
| 1  | 29.378155847 | 29.293460843 | 28.470193232 | 1  | 25.350934305 | 34.389747531 | 30.740496295  |
| 8  | 26.659341018 | 30.116740059 | 23.287640349 | 1  | 25.962269957 | 32.794070259 | 30.906650579  |
| 6  | 25.706039571 | 30.869396353 | 23.301329889 | 7  | 28.276261311 | 33.437171908 | 31.728656738  |
| 7  | 25.557565278 | 31.860688234 | 24.296200660 | 1  | 29.042755051 | 33.604003313 | 32.376963025  |
| 6  | 26.608281425 | 31.940996089 | 25.333755332 | 1  | 28.241313245 | 32.521546913 | 31.272530487  |
| 6  | 24.524930403 | 32.767061867 | 24.314849268 | 26 | 25.441009094 | 29.566010569 | 28.856010316  |
| 7  | 24.440662233 | 33.672052935 | 25.270825204 | 8  | 25.873009249 | 30.993011079 | 27.888009970  |
| 6  | 23.548862739 | 32.70388505  | 23.274072615 | 8  | 28.151101160 | 31.031160435 | 30.266474227  |
| 6  | 23.636563444 | 31.722107709 | 22.347057682 | 6  | 28.149595074 | 29.854466791 | 29.909505151  |
| 7  | 24.679666000 | 30.827688433 | 22.349364757 | 8  | 27.059543658 | 29.155429741 | 29.752961964  |
| 1  | 26.234190999 | 31.585074180 | 26.304985125 | 6  | 29.436826332 | 29.154530383 | 29.516245994  |
| 1  | 26.937766744 | 32.983169146 | 25.436204836 | 6  | 29.536485166 | 27.647221817 | 29.801065372  |
| 1  | 24.795489671 | 33.550472541 | 26.245470026 | 6  | 30.264611566 | 27.326478538 | 31.119263737  |
| 1  | 22.872173347 | 31.612372270 | 21.580512813 | 8  | 29.664920543 | 26.670328727 | 32.001727126  |
| 1  | 22.709129376 | 33.396941917 | 23.273287120 | 8  | 31.457711795 | 27.745702301 | 31.199228759  |
| 1  | 27.449831083 | 31.316325799 | 25.026619127 | 1  | 30.151596265 | 27.186649837 | 29.011814158  |
| 1  | 23.659572674 | 34.333718567 | 25.195525572 | 1  | 28.542669914 | 27.178175540 | 29.793237247  |
| 8  | 28.912719310 | 32.124673528 | 27.712237529 | 1  | 30.275795367 | 29.691598295 | 29.978614367  |
| 1  | 29.851208562 | 31.808534668 | 27.713598647 | 1  | 29.503138464 | 29.356423437 | 28.431276801  |
| 1  | 28.562248948 | 31.789740922 | 28.554635061 | 8  | 26.542104884 | 29.970368155 | 23.582715319  |
| 8  | 24.335775349 | 33.199059657 | 27.926272216 | 6  | 25.630579297 | 30.767159261 | 23.523131025  |
| 1  | 24.709127811 | 32.402165356 | 28.350215001 | 7  | 25.477586645 | 31.787326556 | 24.509001908  |
| 1  | 24.185025425 | 33.856088595 | 28.672729849 | 6  | 26.462009457 | 31.827011378 | 25.566009137  |
| 1  | 23.670310045 | 27.565675365 | 24.600195357 | 6  | 24.502289792 | 32.767980657 | 24.424418868  |
| 1  | 21.227724132 | 31.311752909 | 30.328586476 | 7  | 24.433120081 | 33.728308895 | 25.320839455  |
| 1  | 24.347242504 | 24.124188674 | 30.290889201 | 6  | 23.577875025 | 32.709547629 | 23.338410805  |
| 1  | 26.217132468 | 36.751731785 | 33.135578744 | 6  | 23.667967356 | 31.708436954 | 22.433442068  |
| 1  | 24.684213220 | 30.106503347 | 21.656657107 | 7  | 24.673142155 | 30.772485964 | 22.503205865  |

**TS7**

**QM/MM (BS1) = -3371.336675 a.u.**

**QM/MM (BS2+ZPE) = -3373.285174 a.u.**

|   |              |              |              |   |              |              |              |
|---|--------------|--------------|--------------|---|--------------|--------------|--------------|
| 6 | 24.350133050 | 27.715431373 | 25.226912557 | 1 | 26.093009324 | 31.324011194 | 26.699009542 |
| 7 | 25.423423507 | 26.901576465 | 25.505308093 | 1 | 26.726493172 | 32.853063521 | 25.843698047 |
|   |              |              |              | 1 | 24.734828929 | 33.643368655 | 26.328992309 |
|   |              |              |              | 1 | 22.936263073 | 31.615635812 | 21.631949006 |
|   |              |              |              | 1 | 22.770632727 | 33.438051136 | 23.278612193 |
|   |              |              |              | 1 | 27.331037728 | 31.213609379 | 25.320187111 |
|   |              |              |              | 1 | 23.692086282 | 34.423662644 | 25.170248336 |

|   |              |              |              |
|---|--------------|--------------|--------------|
| 8 | 28.989604054 | 32.233884874 | 27.649258372 |
| 1 | 29.918406929 | 31.891470956 | 27.643967012 |
| 1 | 28.646995695 | 31.929218614 | 28.506472793 |
| 8 | 24.444209917 | 33.363496343 | 27.932408200 |
| 1 | 24.952856528 | 32.601221734 | 28.280960289 |
| 1 | 24.253333159 | 33.990279172 | 28.694094534 |
| 1 | 23.567795003 | 27.475247128 | 24.506963930 |
| 1 | 21.306780027 | 31.360437565 | 30.119467856 |
| 1 | 24.393145709 | 24.313582465 | 30.258671271 |
| 1 | 26.198197299 | 36.918226199 | 33.191552590 |
| 1 | 24.691571874 | 30.058373575 | 21.803437090 |

**Snapshot 2  
RC2**

**QM/MM (B1) = -3369.665144 a.u.**  
**QM/MM (B2+ZPE) = -3371.606048 a.u.**

|    |              |              |              |
|----|--------------|--------------|--------------|
| 6  | 43.336524795 | 30.520830215 | 31.354033780 |
| 7  | 42.488813868 | 29.446448970 | 31.496181404 |
| 1  | 42.752933345 | 28.485431219 | 31.735625489 |
| 6  | 41.242414197 | 29.860319809 | 31.202048390 |
| 1  | 40.369234085 | 29.214547090 | 31.220731686 |
| 7  | 41.247352373 | 31.140714181 | 30.867911032 |
| 6  | 42.547170154 | 31.574498351 | 30.954269626 |
| 1  | 42.828588520 | 32.590139815 | 30.681007173 |
| 6  | 40.781551461 | 35.173614218 | 27.353355980 |
| 1  | 40.572674278 | 34.823956641 | 26.329780006 |
| 1  | 40.183519478 | 36.087719655 | 27.494766259 |
| 6  | 40.262557969 | 34.114044671 | 28.303560528 |
| 8  | 41.039759298 | 33.435263521 | 29.047566960 |
| 8  | 39.028638250 | 33.858825929 | 28.311152301 |
| 6  | 40.606763956 | 29.085236464 | 26.973786987 |
| 7  | 41.313360700 | 30.153236895 | 26.458405807 |
| 1  | 41.917708418 | 30.159997356 | 25.640565221 |
| 6  | 41.048351480 | 31.232381407 | 27.215006298 |
| 1  | 41.501048038 | 32.200046508 | 27.036391503 |
| 7  | 40.200070608 | 30.926712261 | 28.187541639 |
| 6  | 39.911210507 | 29.586398583 | 28.047768793 |
| 1  | 39.217514009 | 29.091547151 | 28.721957563 |
| 6  | 35.737281256 | 38.390099183 | 29.756346952 |
| 1  | 36.005856024 | 38.893451159 | 30.696059736 |
| 1  | 36.502552898 | 38.631288611 | 29.017194398 |
| 7  | 35.653493415 | 36.952688306 | 29.957335715 |
| 1  | 34.912744757 | 36.620899151 | 30.587301116 |
| 6  | 36.455190412 | 36.033806468 | 29.409921505 |
| 7  | 37.400301148 | 36.340833706 | 28.514974878 |
| 1  | 37.693115865 | 37.294638961 | 28.274679452 |
| 1  | 37.983942727 | 35.570040824 | 28.191793933 |
| 7  | 36.281658158 | 34.736139873 | 29.728041832 |
| 1  | 35.850144936 | 34.472180440 | 30.628275522 |
| 1  | 36.996308408 | 34.098021104 | 29.390486555 |
| 26 | 39.658013878 | 32.180923730 | 29.856339983 |
| 8  | 39.272013614 | 33.229943288 | 31.031414572 |
| 8  | 37.830460512 | 31.309191696 | 32.370788257 |
| 6  | 37.582199350 | 30.751782275 | 31.309092989 |
| 8  | 38.306626563 | 30.894984931 | 30.212369817 |
| 6  | 36.451935649 | 29.743346623 | 31.203707430 |
| 6  | 35.743153774 | 29.590423664 | 29.867601452 |
| 6  | 34.843159706 | 28.339551244 | 29.805060808 |
| 8  | 34.290300992 | 28.135146419 | 28.693619502 |
| 8  | 34.743563510 | 27.628696576 | 30.832551154 |
| 1  | 36.466990382 | 29.511961103 | 29.040242163 |

|   |              |              |              |
|---|--------------|--------------|--------------|
| 1 | 35.121689267 | 30.470144057 | 29.626492660 |
| 1 | 35.743271230 | 29.950915076 | 32.017243122 |
| 1 | 36.878306766 | 28.759859069 | 31.462249675 |
| 8 | 41.815923540 | 31.355717611 | 35.117960366 |
| 6 | 42.257515498 | 32.407286469 | 34.706895183 |
| 7 | 41.398180150 | 33.431788763 | 34.254101272 |
| 6 | 39.951634738 | 33.153903851 | 34.369201753 |
| 6 | 41.841989642 | 34.603648029 | 33.697565623 |
| 7 | 40.998606570 | 35.502118056 | 33.230106237 |
| 6 | 43.259678209 | 34.826737997 | 33.637523389 |
| 6 | 44.101566128 | 33.878368085 | 34.112780043 |
| 7 | 43.626171227 | 32.703194825 | 34.645558640 |
| 1 | 39.811885392 | 32.432179491 | 35.179498008 |
| 1 | 39.553411781 | 32.734340277 | 33.432199378 |
| 1 | 41.394725512 | 36.407456116 | 32.933513169 |
| 1 | 45.184686953 | 34.009414136 | 34.064363595 |
| 1 | 43.639533693 | 35.745019012 | 33.192036358 |
| 1 | 39.424121942 | 34.084559867 | 34.609629753 |
| 1 | 39.970928281 | 35.387929025 | 33.139679783 |
| 8 | 38.285026320 | 35.427691790 | 32.430095649 |
| 1 | 37.384341157 | 35.220312756 | 32.742045045 |
| 1 | 38.472849286 | 34.705161302 | 31.795071218 |
| 8 | 35.457096365 | 34.086915087 | 32.343923378 |
| 1 | 35.623691147 | 33.292472925 | 32.919206026 |
| 1 | 34.503782143 | 34.246338486 | 32.492769984 |
| 1 | 44.422465245 | 30.448199664 | 31.413409441 |
| 1 | 41.843508862 | 35.409878789 | 27.420384740 |
| 1 | 40.726153318 | 28.070269352 | 26.594768159 |
| 1 | 34.805686024 | 38.825714968 | 29.395186967 |
| 1 | 44.275857646 | 32.006479657 | 34.949644181 |

**TS7**

**QM/MM (BS1) = -3369.626225 a.u.**  
**QM/MM (BS2+ZPE) = -3371.567654 a.u.**

|   |              |              |              |
|---|--------------|--------------|--------------|
| 6 | 43.440532080 | 30.457823943 | 31.398793629 |
| 7 | 42.596520044 | 29.382737458 | 31.548569026 |
| 1 | 42.860172861 | 28.415371543 | 31.759342319 |
| 6 | 41.343035468 | 29.801479209 | 31.296547223 |
| 1 | 40.471786271 | 29.153551945 | 31.328760380 |
| 7 | 41.338430536 | 31.085768707 | 30.980393789 |
| 6 | 42.641214550 | 31.516481067 | 31.035009284 |
| 1 | 42.918247418 | 32.534598392 | 30.764579215 |
| 6 | 40.782574953 | 35.152604569 | 27.444010943 |
| 1 | 40.565916225 | 34.789938334 | 26.425689646 |
| 1 | 40.193296631 | 36.073681630 | 27.572777225 |
| 6 | 40.248725381 | 34.112907882 | 28.413395807 |
| 8 | 41.035292020 | 33.387766883 | 29.109932605 |
| 8 | 39.009988181 | 33.925311160 | 28.471394544 |
| 6 | 40.593458122 | 29.080625298 | 27.057557264 |
| 7 | 41.286667253 | 30.157060021 | 26.542961198 |
| 1 | 41.870852583 | 30.176559742 | 25.711157043 |
| 6 | 41.039220082 | 31.224374431 | 27.320868376 |
| 1 | 41.487114293 | 32.195413710 | 27.151387127 |
| 7 | 40.214773967 | 30.902005896 | 28.309266171 |
| 6 | 39.922438134 | 29.563417187 | 28.156102653 |
| 1 | 39.243699329 | 29.057781346 | 28.837747102 |
| 6 | 35.721953631 | 38.398747701 | 29.761175800 |
| 1 | 35.987475174 | 38.898369597 | 30.703606888 |

|    |              |              |              |    |              |              |               |
|----|--------------|--------------|--------------|----|--------------|--------------|---------------|
| 1  | 36.491042933 | 38.641956565 | 29.026516464 | 7  | 37.196252692 | 38.605411028 | 34.491996699  |
| 7  | 35.633571342 | 36.960870746 | 29.954458224 | 6  | 37.496275417 | 39.759452420 | 35.179349806  |
| 1  | 34.884773649 | 36.625632170 | 30.572874601 | 1  | 36.817911999 | 40.607758169 | 35.199093325  |
| 6  | 36.439801773 | 36.045346564 | 29.407498831 | 6  | 33.967330723 | 42.121818180 | 32.359880231  |
| 7  | 37.389890432 | 36.357782448 | 28.520546574 | 1  | 34.347072445 | 42.070511720 | 31.330734460  |
| 1  | 37.680644924 | 37.313218745 | 28.285822814 | 1  | 32.878908681 | 42.284222217 | 32.351758667  |
| 1  | 38.000622743 | 35.592593845 | 28.232887012 | 6  | 34.245499676 | 40.813103977 | 33.081175190  |
| 7  | 36.266866537 | 34.745784525 | 29.718051458 | 8  | 35.249725358 | 40.151810553 | 32.580473557  |
| 1  | 35.833634976 | 34.473768649 | 30.614747725 | 8  | 33.548735093 | 40.451787985 | 34.020135103  |
| 1  | 36.975332848 | 34.108371706 | 29.365479676 | 6  | 39.197837881 | 38.813010671 | 30.361061951  |
| 26 | 39.744433603 | 32.119207661 | 29.987458628 | 7  | 38.770348925 | 40.123749225 | 30.434410792  |
| 8  | 39.451216679 | 33.269213658 | 31.252420011 | 1  | 39.219885490 | 40.944570233 | 30.025034520  |
| 8  | 37.776817148 | 31.714157580 | 32.491802130 | 6  | 37.631891719 | 40.138653084 | 31.154058634  |
| 6  | 37.570978930 | 30.757013314 | 31.419677408 | 1  | 37.059299657 | 41.029391086 | 31.387501150  |
| 8  | 38.337575425 | 30.901165509 | 30.354512647 | 7  | 37.311814547 | 38.912887484 | 31.544516581  |
| 6  | 36.440292527 | 29.752340810 | 31.272418047 | 6  | 38.280774740 | 38.072043812 | 31.054416452  |
| 6  | 35.774639995 | 29.594188209 | 29.914141622 | 1  | 38.241468830 | 37.003102007 | 31.236642258  |
| 6  | 34.869858624 | 28.346502913 | 29.828335680 | 6  | 28.445085068 | 38.731952025 | 32.265216930  |
| 8  | 34.320356428 | 28.158895449 | 28.712119983 | 1  | 27.972223655 | 38.943657104 | 33.238917102  |
| 8  | 34.765105379 | 27.619188430 | 30.843904774 | 1  | 28.786648164 | 39.684890684 | 31.837388623  |
| 1  | 36.525613410 | 29.506440736 | 29.111739507 | 7  | 29.552598111 | 37.793623198 | 32.380644871  |
| 1  | 35.166902647 | 30.475454478 | 29.645703826 | 1  | 29.347508917 | 36.809424949 | 32.200495769  |
| 1  | 35.705287427 | 29.966293871 | 32.060644028 | 6  | 30.788635205 | 38.113635530 | 32.798864928  |
| 1  | 36.851795552 | 28.767320473 | 31.547507358 | 7  | 31.069384506 | 39.357023055 | 33.205259471  |
| 8  | 41.757619045 | 31.293440482 | 34.710647118 | 1  | 30.403224657 | 40.139896900 | 33.170554974  |
| 6  | 42.218562221 | 32.378412066 | 34.432544228 | 1  | 32.024022586 | 39.610658218 | 33.484543882  |
| 7  | 41.387522997 | 33.420705331 | 33.927847761 | 7  | 31.759152371 | 37.195864271 | 32.781027950  |
| 6  | 40.000664391 | 33.106590806 | 33.733940860 | 1  | 31.544044766 | 36.206964657 | 32.641391489  |
| 6  | 41.866101556 | 34.663707451 | 33.566704651 | 1  | 32.676580829 | 37.400848958 | 33.190558398  |
| 7  | 41.050138617 | 35.592460328 | 33.113371297 | 26 | 35.797773036 | 38.357119841 | 32.928428892  |
| 6  | 43.272832365 | 34.903329985 | 33.687609307 | 8  | 34.490579091 | 37.911059277 | 33.786107613  |
| 6  | 44.074774842 | 33.930854985 | 34.183347708 | 8  | 34.354839967 | 35.454753972 | 32.495014775  |
| 7  | 43.569867726 | 32.713027700 | 34.577246868 | 6  | 35.546610205 | 35.530445756 | 32.218232282  |
| 1  | 39.749478334 | 32.118075762 | 34.116482654 | 8  | 36.265333230 | 36.619732638 | 32.322435199  |
| 1  | 39.704768767 | 33.029747311 | 32.391708179 | 6  | 36.332184827 | 34.359123753 | 31.659133166  |
| 1  | 41.456401962 | 36.522596841 | 32.923470348 | 6  | 35.636373764 | 33.020814101 | 31.808762711  |
| 1  | 45.152327462 | 34.079686637 | 34.270361360 | 6  | 36.087802921 | 31.962639422 | 30.792306801  |
| 1  | 43.681060994 | 35.860189165 | 33.366937620 | 8  | 36.615867347 | 32.354503171 | 29.731737855  |
| 1  | 39.327536044 | 33.912838595 | 34.047344530 | 8  | 35.822492229 | 30.757708208 | 31.089553472  |
| 1  | 40.030675276 | 35.484815436 | 32.956077599 | 1  | 34.553065891 | 33.167436617 | 31.659598371  |
| 8  | 38.309285789 | 35.542389275 | 32.302556830 | 1  | 35.744959443 | 32.625688038 | 32.8278755076 |
| 1  | 37.423854737 | 35.315484469 | 32.642208750 | 1  | 37.338703980 | 34.36331294  | 32.107481421  |
| 1  | 38.511075696 | 34.805980855 | 31.683721085 | 1  | 36.506436916 | 34.543243526 | 30.585099294  |
| 8  | 35.430537562 | 34.093802302 | 32.325616015 | 8  | 36.751541901 | 36.523673245 | 39.170070459  |
| 1  | 35.583846905 | 33.312946290 | 32.920409560 | 6  | 36.201204134 | 37.585002026 | 38.961758686  |
| 1  | 34.475128238 | 34.256019111 | 32.458797969 | 7  | 34.977099643 | 37.647452879 | 38.263704668  |
| 1  | 44.527820826 | 30.387242228 | 31.428605205 | 6  | 34.427503216 | 36.367948563 | 37.785005568  |
| 1  | 41.846645259 | 35.383428949 | 27.494427342 | 6  | 34.313523882 | 38.818819698 | 37.978688616  |
| 1  | 40.708328120 | 28.075204422 | 26.652586817 | 7  | 33.193711479 | 38.789436729 | 37.296455780  |
| 1  | 34.792479067 | 38.835679730 | 29.396162426 | 6  | 34.890513428 | 40.045265958 | 38.450573030  |
| 1  | 44.205932662 | 32.010880707 | 34.897221073 | 6  | 36.065995743 | 40.009310904 | 39.124885659  |

### Snapshot 3

#### RC2

QM/MM (BS1) = -3446.808270 a.u.

QM/MM (BS2+ZPE) = -3448.819020 a.u.

|   |              |              |              |   |              |              |              |
|---|--------------|--------------|--------------|---|--------------|--------------|--------------|
| 6 | 38.731158862 | 39.615048522 | 35.771533460 | 1 | 36.713495411 | 38.821004613 | 39.368575719 |
| 7 | 39.157576076 | 38.353465221 | 35.425596676 | 1 | 33.351752434 | 36.319324174 | 37.992728456 |
| 1 | 40.052357160 | 37.911441110 | 35.660772428 | 1 | 34.950918768 | 35.559411235 | 38.302028266 |
| 6 | 38.217381380 | 37.777040275 | 34.662437716 | 1 | 32.677879874 | 39.653273624 | 37.083311821 |
| 1 | 38.303622365 | 36.780397640 | 34.236708920 | 1 | 36.541390967 | 40.929080569 | 39.475926547 |
|   |              |              |              | 1 | 34.395196607 | 40.994713889 | 38.253773344 |
|   |              |              |              | 1 | 34.569736954 | 36.267398985 | 36.697834199 |
|   |              |              |              | 1 | 32.762034847 | 37.941710938 | 36.856304592 |
|   |              |              |              | 8 | 31.191282279 | 40.319638445 | 36.129406751 |
|   |              |              |              | 1 | 30.248210352 | 40.649848779 | 36.121048910 |
|   |              |              |              | 1 | 31.164643698 | 39.599827680 | 35.478311530 |

|   |              |              |              |
|---|--------------|--------------|--------------|
| 8 | 31.852308458 | 36.819341275 | 35.967747441 |
| 1 | 30.874181793 | 36.775839656 | 35.829930683 |
| 1 | 32.227728728 | 35.993448665 | 35.588052271 |
| 8 | 33.073533606 | 34.628354711 | 34.770702037 |
| 1 | 33.447923764 | 33.748216813 | 35.044519274 |
| 1 | 33.666840613 | 34.941132904 | 34.055082292 |
| 1 | 39.380008419 | 40.340446404 | 36.262307834 |
| 1 | 34.457446267 | 42.959690082 | 32.855687399 |
| 1 | 40.161084823 | 38.494874542 | 29.962298800 |
| 1 | 27.683422277 | 38.327107738 | 31.598855004 |
| 1 | 37.594642969 | 38.834924896 | 39.841183068 |

**TS7**

**QM/MM (BS1) = -3446.767386 a.u.**

**QM/MM (BS2+ZPE) = -3448.776399 a.u.**

|    |              |              |              |
|----|--------------|--------------|--------------|
| 6  | 38.891593482 | 39.688946865 | 35.933965977 |
| 7  | 39.314240778 | 38.420426828 | 35.614860740 |
| 1  | 40.224376735 | 37.990321805 | 35.802207510 |
| 6  | 38.339950283 | 37.799672139 | 34.936067773 |
| 1  | 38.413212915 | 36.785186498 | 34.552503201 |
| 7  | 37.298640579 | 38.607051462 | 34.790219078 |
| 6  | 37.623925987 | 39.794070889 | 35.407510329 |
| 1  | 36.939772116 | 40.637833476 | 35.425056302 |
| 6  | 33.957480517 | 41.972645346 | 32.503161644 |
| 1  | 34.341196730 | 41.868897268 | 31.478068445 |
| 1  | 32.871808281 | 42.153533434 | 32.475065465 |
| 6  | 34.199299433 | 40.688984940 | 33.293213990 |
| 8  | 35.215458687 | 40.001358952 | 32.870469335 |
| 8  | 33.450510218 | 40.376708481 | 34.213085432 |
| 6  | 39.122062170 | 38.721901695 | 30.548868904 |
| 7  | 38.636161730 | 40.012147193 | 30.593286429 |
| 1  | 39.031882181 | 40.831327376 | 30.133529133 |
| 6  | 37.534551352 | 40.007915993 | 31.369944801 |
| 1  | 36.930993378 | 40.880157741 | 31.593658372 |
| 7  | 37.294327498 | 38.786642996 | 31.828633963 |
| 6  | 38.279745941 | 37.970842854 | 31.324602327 |
| 1  | 38.305823674 | 36.911131244 | 31.557892652 |
| 6  | 28.439416241 | 38.733844913 | 32.244081633 |
| 1  | 27.967588756 | 38.935473045 | 33.220658127 |
| 1  | 28.762021070 | 39.693995137 | 31.816705805 |
| 7  | 29.564943213 | 37.815989838 | 32.354109056 |
| 1  | 29.385183146 | 36.832627122 | 32.145485413 |
| 6  | 30.762630557 | 38.149046225 | 32.864782098 |
| 7  | 30.973870500 | 39.373795857 | 33.354434929 |
| 1  | 30.296009361 | 40.143510254 | 33.281173101 |
| 1  | 31.905786810 | 39.648899435 | 33.692887665 |
| 7  | 31.764283331 | 37.261606426 | 32.857812633 |
| 1  | 31.586427763 | 36.278607901 | 32.644716765 |
| 1  | 32.619873327 | 37.450679177 | 33.386323103 |
| 26 | 35.870114651 | 38.243183603 | 33.285650306 |
| 8  | 34.573904013 | 37.773525004 | 34.326984130 |
| 8  | 34.390124580 | 35.572257764 | 32.401323266 |
| 6  | 35.618512275 | 35.524882303 | 32.357253734 |
| 8  | 36.402535741 | 36.475409147 | 32.792096354 |
| 6  | 36.354215921 | 34.352127839 | 31.738093275 |
| 6  | 35.559610396 | 33.059697473 | 31.776105897 |
| 6  | 36.049765094 | 31.992382322 | 30.788974868 |
| 8  | 36.608237569 | 32.380115376 | 29.743169682 |
| 8  | 35.783097231 | 30.787631568 | 31.087858200 |
| 1  | 34.512901195 | 33.287382965 | 31.510285846 |
| 1  | 35.531411435 | 32.646065495 | 32.793599773 |

|   |              |              |              |
|---|--------------|--------------|--------------|
| 1 | 37.343473994 | 34.249835061 | 32.208887525 |
| 1 | 36.558907528 | 34.602946239 | 30.682304922 |
| 8 | 37.211822002 | 36.880272892 | 38.109335277 |
| 6 | 36.482486697 | 37.837037582 | 38.265977516 |
| 7 | 35.229235779 | 37.911048270 | 37.597890641 |
| 6 | 34.909976562 | 36.849357320 | 36.691571868 |
| 6 | 34.359956836 | 38.982483336 | 37.724223475 |
| 7 | 33.181554034 | 38.926800226 | 37.155259924 |
| 6 | 34.816653805 | 40.120888371 | 38.461973333 |
| 6 | 35.998477563 | 40.056041753 | 39.125465452 |
| 7 | 36.779356081 | 38.924217455 | 39.091531575 |
| 1 | 33.899694780 | 36.445677498 | 36.819584617 |
| 1 | 35.704624114 | 36.103606672 | 36.666368923 |
| 1 | 32.540894697 | 39.729312373 | 37.161585253 |
| 1 | 36.370479268 | 40.915807655 | 39.686658200 |
| 1 | 34.211119935 | 41.024738459 | 38.501881632 |
| 1 | 34.801556568 | 37.349536450 | 35.383116512 |
| 1 | 32.799026692 | 38.103935325 | 36.636805271 |
| 8 | 30.882236955 | 40.182452932 | 36.315388948 |
| 1 | 29.981278721 | 40.603647832 | 36.192853225 |
| 1 | 30.842501306 | 39.435764280 | 35.695673123 |
| 8 | 31.845651816 | 36.860795084 | 35.909501325 |
| 1 | 30.862190398 | 36.823180313 | 35.811821327 |
| 1 | 32.197983511 | 36.040225541 | 35.497615747 |
| 8 | 33.079099577 | 34.695229492 | 34.680631534 |
| 1 | 33.445212132 | 33.812332421 | 34.956514457 |
| 1 | 33.666205410 | 35.014141405 | 33.962179564 |
| 1 | 39.556486867 | 40.438978366 | 36.362261267 |
| 1 | 34.454897606 | 42.829260220 | 32.957974260 |
| 1 | 40.069069578 | 38.440246808 | 30.088526841 |
| 1 | 27.680140717 | 38.318312849 | 31.581585516 |
| 1 | 37.629002660 | 38.898771173 | 39.618243715 |

**Snapshot 4**

**RC2**

**QM/MM (BS1) = -3370.511712 a.u.**

**QM/MM (BS2+ZPE) = -3372.448429 a.u.**

|   |              |              |              |
|---|--------------|--------------|--------------|
| 6 | 36.513129844 | 33.978991689 | 42.373119936 |
| 7 | 37.239677146 | 33.769299028 | 41.224526323 |
| 1 | 38.256358709 | 33.689311040 | 41.127223179 |
| 6 | 36.397099752 | 33.749850531 | 40.182499690 |
| 1 | 36.696984610 | 33.610757482 | 39.147278398 |
| 7 | 35.154462209 | 33.945158990 | 40.600066848 |
| 6 | 35.202465517 | 34.087953290 | 41.965959954 |
| 1 | 34.306739724 | 34.266235180 | 42.554515473 |
| 6 | 30.573235193 | 36.355770982 | 41.476410058 |
| 1 | 30.811665576 | 37.245542076 | 40.877557766 |
| 1 | 29.512529677 | 36.102092543 | 41.329856134 |
| 6 | 31.416469128 | 35.172234055 | 41.018672283 |
| 8 | 32.501387694 | 35.536571808 | 40.384233858 |
| 8 | 31.063578511 | 34.016204020 | 41.211948923 |
| 6 | 36.160160983 | 38.005167651 | 38.632506158 |
| 7 | 35.286401141 | 38.488297467 | 39.586732363 |
| 1 | 35.307615095 | 39.405222032 | 40.036535671 |
| 6 | 34.367578539 | 37.531144636 | 39.823309255 |
| 1 | 33.546199525 | 37.628576333 | 40.526391648 |
| 7 | 34.609531628 | 36.456805297 | 39.080029135 |
| 6 | 35.728927124 | 36.740541507 | 38.332212642 |
| 1 | 36.152110487 | 36.012329444 | 37.647716018 |
| 6 | 26.681996493 | 33.053241172 | 37.553514837 |

|    |              |              |              |    |              |              |               |
|----|--------------|--------------|--------------|----|--------------|--------------|---------------|
| 1  | 26.348737828 | 32.157218479 | 38.106895373 | 7  | 35.217310246 | 33.904050395 | 40.672350624  |
| 1  | 26.517331874 | 33.926845356 | 38.198473533 | 6  | 35.271318701 | 34.112225354 | 42.029484740  |
| 7  | 28.077724110 | 32.948319887 | 37.156510608 | 1  | 34.381060129 | 34.335011527 | 42.609990611  |
| 1  | 28.271917830 | 32.466524015 | 36.277546371 | 6  | 30.596970963 | 36.302632855 | 41.474206771  |
| 6  | 29.118880786 | 33.042538430 | 38.010928195 | 1  | 30.837053717 | 37.180748444 | 40.858774794  |
| 7  | 28.946402563 | 33.550022243 | 39.238139941 | 1  | 29.535530007 | 36.049096029 | 41.3322861188 |
| 1  | 28.083750290 | 34.013918197 | 39.543361583 | 6  | 31.437786499 | 35.108287022 | 41.039200005  |
| 1  | 29.730926584 | 33.580921770 | 39.892049919 | 8  | 32.522765470 | 35.436012790 | 40.408168735  |
| 7  | 30.324373156 | 32.621887053 | 37.636981673 | 8  | 31.059172830 | 33.957622390 | 41.261712889  |
| 1  | 30.521790418 | 32.145152264 | 36.733345384 | 6  | 36.149799713 | 37.949029300 | 38.639654242  |
| 1  | 31.140272815 | 32.860358049 | 38.206282126 | 7  | 35.255432942 | 38.429822296 | 39.573727293  |
| 26 | 33.650149606 | 34.548125170 | 39.245968505 | 1  | 35.253403855 | 39.354342370 | 40.006456617  |
| 8  | 32.778363157 | 33.175398073 | 39.196957325 | 6  | 34.356434013 | 37.456431227 | 39.822290340  |
| 8  | 32.992071997 | 34.374558853 | 36.424116949 | 1  | 33.526114840 | 37.551756460 | 40.514583015  |
| 6  | 34.190601659 | 34.121205286 | 36.565034834 | 7  | 34.632813675 | 36.372754651 | 39.104646381  |
| 8  | 34.769685249 | 34.099736782 | 37.727309102 | 6  | 35.754147712 | 36.667032569 | 38.363136792  |
| 6  | 35.109902648 | 33.882639984 | 35.380162936 | 1  | 36.205840616 | 35.934252305 | 37.702575781  |
| 6  | 34.685138097 | 32.694782446 | 34.483921978 | 6  | 26.705090693 | 33.054916383 | 37.549215505  |
| 6  | 34.895481402 | 33.106681952 | 33.020336386 | 1  | 26.366795637 | 32.162135530 | 38.104898755  |
| 8  | 33.955329110 | 33.747696367 | 32.480344267 | 1  | 26.537453749 | 33.931878938 | 38.88249268   |
| 8  | 36.015451627 | 32.870490180 | 32.502948534 | 7  | 28.105350845 | 32.943869374 | 37.165334067  |
| 1  | 33.627255102 | 32.461949188 | 34.657995771 | 1  | 28.303912781 | 32.447685898 | 36.295166889  |
| 1  | 35.293932222 | 31.811909316 | 34.724666495 | 6  | 29.131450857 | 33.019915669 | 38.040977276  |
| 1  | 36.147188266 | 33.771843471 | 35.723037799 | 7  | 28.938239391 | 33.534549487 | 39.261856411  |
| 1  | 35.059048910 | 34.814294314 | 34.792563063 | 1  | 28.074455191 | 34.008869015 | 39.546069595  |
| 8  | 35.796981620 | 29.351046350 | 41.914331934 | 1  | 29.706314767 | 33.560125840 | 39.932740956  |
| 6  | 35.008271633 | 29.869508300 | 42.670878639 | 7  | 30.338463405 | 32.579229641 | 37.694382159  |
| 7  | 33.690713376 | 30.182290668 | 42.257583339 | 1  | 30.545489091 | 32.106913614 | 36.790034820  |
| 6  | 33.357049192 | 29.908896201 | 40.848565716 | 1  | 31.144683486 | 32.767252662 | 38.296100121  |
| 6  | 32.741660724 | 30.718982446 | 43.085361403 | 26 | 33.726604627 | 34.477107662 | 39.278812404  |
| 7  | 31.540391517 | 30.987434360 | 42.606010605 | 8  | 32.879664838 | 32.969378368 | 39.282791494  |
| 6  | 33.098246951 | 30.983275673 | 44.443061834 | 8  | 33.070662740 | 34.347703652 | 36.563723401  |
| 6  | 34.373787106 | 30.743800139 | 44.846131070 | 6  | 34.271022186 | 34.069212399 | 36.651272909  |
| 7  | 35.311338788 | 30.219980317 | 43.992162558 | 8  | 34.879425360 | 34.000693311 | 37.796186559  |
| 1  | 33.218404260 | 30.857156494 | 40.301654346 | 6  | 35.146246044 | 33.858239150 | 35.429828089  |
| 1  | 32.444908791 | 29.297514192 | 40.794358423 | 6  | 34.707042601 | 32.679776916 | 34.529237019  |
| 1  | 31.343558859 | 30.944316982 | 41.612618356 | 6  | 34.904391186 | 33.102885894 | 33.065432633  |
| 1  | 34.693810714 | 30.985321922 | 45.860098223 | 8  | 33.957595518 | 33.743028013 | 32.535337727  |
| 1  | 32.368778960 | 31.423018490 | 45.121369111 | 8  | 36.020891167 | 32.873193058 | 32.537707277  |
| 1  | 34.185169691 | 29.347179033 | 40.408542943 | 1  | 33.650603799 | 32.447407529 | 34.712964438  |
| 1  | 30.753059243 | 31.286840318 | 43.198100197 | 1  | 35.317368530 | 31.794537765 | 34.758159245  |
| 8  | 30.986702730 | 31.359339316 | 35.254144274 | 1  | 36.196374328 | 33.750559052 | 35.732717716  |
| 1  | 31.715125665 | 30.686216182 | 35.196624496 | 1  | 35.064314319 | 34.798128992 | 34.859246694  |
| 1  | 31.244481712 | 32.095391462 | 34.649016458 | 8  | 35.944780159 | 30.534576171 | 41.591047710  |
| 8  | 31.628173043 | 33.716466692 | 33.986498174 | 6  | 35.096396721 | 30.636263056 | 42.447688509  |
| 1  | 32.010602011 | 34.083352496 | 34.810428833 | 7  | 33.743882629 | 30.927971395 | 42.100045631  |
| 1  | 32.385418410 | 33.747380544 | 33.344369147 | 6  | 33.423954257 | 30.936902426 | 40.702568814  |
| 1  | 36.982302261 | 34.162062580 | 43.339778928 | 6  | 32.755199655 | 31.145058747 | 43.039213479  |
| 1  | 30.745688974 | 36.610652861 | 42.522049692 | 7  | 31.564730829 | 31.541373829 | 42.630158381  |
| 1  | 37.071540860 | 38.509308339 | 38.311108879 | 6  | 33.074374808 | 30.934365656 | 44.412677545  |
| 1  | 26.028381050 | 33.172577918 | 36.689447179 | 6  | 34.350163041 | 30.622574183 | 44.761118634  |
| 1  | 36.267805356 | 30.168758426 | 44.279426407 | 7  | 35.333645996 | 30.455101992 | 43.816508965  |

**TS7**

**QM/MM (BS1) = -3370.472795 a.u.**

**QM/MM (BS2+ZPE) = -3372.413181 a.u.**

|   |              |              |              |   |              |              |              |
|---|--------------|--------------|--------------|---|--------------|--------------|--------------|
| 6 | 36.578788246 | 34.000734053 | 42.444048669 | 1 | 32.455084923 | 30.458752458 | 40.509482048 |
| 7 | 37.301280956 | 33.729012738 | 41.307971310 | 1 | 31.448981688 | 32.089116643 | 41.769953039 |
| 1 | 38.315684839 | 33.636280865 | 41.207635980 | 1 | 34.635909574 | 30.549937408 | 45.811773285 |
| 6 | 36.457569715 | 33.669620244 | 40.268456877 | 1 | 32.316059259 | 31.121279575 | 45.171061385 |
| 1 | 36.757095219 | 33.473944409 | 39.242627279 | 1 | 34.252766687 | 30.544712524 | 40.112151988 |
|   |              |              |              | 1 | 30.753621944 | 31.555015632 | 43.265450263 |
|   |              |              |              | 8 | 30.996628005 | 31.349879627 | 35.295559056 |
|   |              |              |              | 1 | 31.722330831 | 30.674232254 | 35.226389504 |
|   |              |              |              | 1 | 31.259602205 | 32.096075630 | 34.705717552 |



|   |              |              |              |
|---|--------------|--------------|--------------|
| 8 | 31.657380420 | 33.725443400 | 34.074716107 |
| 1 | 32.040320388 | 34.083186631 | 34.900968558 |
| 1 | 32.412946046 | 33.755346069 | 33.429060431 |
| 1 | 37.046630672 | 34.213950483 | 43.405157158 |
| 1 | 30.768682217 | 36.577532181 | 42.514885844 |
| 1 | 37.045692255 | 38.475384971 | 38.310422425 |
| 1 | 26.053008482 | 33.171557924 | 36.683622720 |
| 1 | 36.281398184 | 30.337877177 | 44.113151221 |

**IM10**

**QM/MM (BS1) = -3370.497094 a.u.**

**QM/MM (BS+ZPE) = -3372.433476 a.u.**

|    |              |              |              |
|----|--------------|--------------|--------------|
| 6  | 36.523982041 | 34.030838168 | 42.293123306 |
| 7  | 37.254117912 | 33.771476572 | 41.158490538 |
| 1  | 38.263221762 | 33.617273713 | 41.080391760 |
| 6  | 36.431157499 | 33.816444149 | 40.101364117 |
| 1  | 36.735981047 | 33.648550342 | 39.072161116 |
| 7  | 35.199219629 | 34.107033453 | 40.493392186 |
| 6  | 35.234934912 | 34.240812494 | 41.859934445 |
| 1  | 34.345195829 | 34.481176109 | 42.433699242 |
| 6  | 30.584517337 | 36.259747558 | 41.524416738 |
| 1  | 30.726876992 | 37.159521070 | 40.910478766 |
| 1  | 29.545379345 | 35.918468424 | 41.413669624 |
| 6  | 31.517266223 | 35.169190889 | 41.028183450 |
| 8  | 32.536227427 | 35.603132548 | 40.371140282 |
| 8  | 31.253047737 | 33.967481396 | 41.212941485 |
| 6  | 36.191204203 | 38.097061624 | 38.552211003 |
| 7  | 35.315064530 | 38.581002595 | 39.504277727 |
| 1  | 35.350524792 | 39.488672120 | 39.972372136 |
| 6  | 34.371348784 | 37.642685574 | 39.709304599 |
| 1  | 33.547790470 | 37.740350999 | 40.409941738 |
| 7  | 34.598149967 | 36.580647363 | 38.942187029 |
| 6  | 35.734010528 | 36.851977647 | 38.214162554 |
| 1  | 36.152682316 | 36.123404061 | 37.527352711 |
| 6  | 26.702596607 | 33.055917200 | 37.493118097 |
| 1  | 26.409148941 | 32.132143997 | 38.023100245 |
| 1  | 26.517460448 | 33.904713682 | 38.164355296 |
| 7  | 28.090838286 | 33.013107412 | 37.062457834 |
| 1  | 28.282280840 | 32.567054521 | 36.164737503 |
| 6  | 29.156403152 | 33.145462056 | 37.880719164 |
| 7  | 29.003354931 | 33.681171754 | 39.103311399 |
| 1  | 28.134420763 | 34.115009588 | 39.433213625 |
| 1  | 29.773380495 | 33.655503853 | 39.766275536 |
| 7  | 30.355326067 | 32.748340026 | 37.475703064 |
| 1  | 30.519027197 | 32.201244640 | 36.605337932 |
| 1  | 31.204271776 | 33.006194732 | 38.001306096 |
| 26 | 33.710163333 | 34.726921012 | 39.107014640 |
| 8  | 32.694073254 | 33.235216153 | 39.043052202 |
| 8  | 33.098984571 | 34.482284365 | 36.345887274 |
| 6  | 34.281932598 | 34.163563453 | 36.502594909 |
| 8  | 34.845235430 | 34.127431532 | 37.669004507 |
| 6  | 35.197281147 | 33.863969627 | 35.329367233 |
| 6  | 34.732172678 | 32.679246533 | 34.448623136 |
| 6  | 34.922115444 | 33.086742204 | 32.981841059 |
| 8  | 33.972871214 | 33.720021366 | 32.449130038 |
| 8  | 36.040221308 | 32.861637743 | 32.454001110 |
| 1  | 33.674624165 | 32.462529939 | 34.645271831 |
| 1  | 35.334372869 | 31.789533998 | 34.682007543 |
| 1  | 36.226592667 | 33.715317975 | 35.681981873 |
| 1  | 35.188153516 | 34.787331173 | 34.725928355 |
| 8  | 35.900884864 | 30.442978928 | 41.789318016 |

|   |              |              |              |
|---|--------------|--------------|--------------|
| 6 | 35.080794899 | 30.530964605 | 42.672641720 |
| 7 | 33.705255061 | 30.809141617 | 42.349176195 |
| 6 | 33.396839072 | 30.831709678 | 41.001724863 |
| 6 | 32.739762645 | 31.050472759 | 43.316877555 |
| 7 | 31.543234744 | 31.470367905 | 42.932785944 |
| 6 | 33.095684670 | 30.839675975 | 44.675143180 |
| 6 | 34.378225649 | 30.520478090 | 44.997064360 |
| 7 | 35.342821125 | 30.359580340 | 44.030259828 |
| 1 | 32.228192377 | 33.219519396 | 39.904092247 |
| 1 | 32.353272215 | 30.787412499 | 40.707580223 |
| 1 | 31.412382482 | 32.009956674 | 42.075638188 |
| 1 | 34.682188961 | 30.445122572 | 46.040126720 |
| 1 | 32.359224364 | 31.035360282 | 45.452693041 |
| 1 | 34.217355564 | 30.754785906 | 40.297622317 |
| 1 | 30.727681474 | 31.448050638 | 43.561406901 |
| 8 | 30.987281153 | 31.349744592 | 35.178783407 |
| 1 | 31.718499964 | 30.677638520 | 35.154095674 |
| 1 | 31.269294171 | 32.089156172 | 34.589162987 |
| 8 | 31.661727643 | 33.725590602 | 33.965934600 |
| 1 | 32.054758391 | 34.109464404 | 34.777364892 |
| 1 | 32.415460321 | 33.742857184 | 33.318930888 |
| 1 | 36.984057526 | 34.179338216 | 43.270029446 |
| 1 | 30.765624737 | 36.547285679 | 42.560075591 |
| 1 | 37.121961011 | 38.583131597 | 38.259815617 |
| 1 | 26.031958568 | 33.179335924 | 36.642777127 |
| 1 | 36.301071322 | 30.250650685 | 44.294576656 |

**TS8**

**QM/MM (BS1) = -3370.487244 a.u.**

**QM/MM (BS2+ZPE) = -3372.420750 a.u.**

|   |              |              |              |
|---|--------------|--------------|--------------|
| 6 | 36.653754237 | 34.040814525 | 42.473578267 |
| 7 | 37.381586154 | 33.802450644 | 41.332653243 |
| 1 | 38.392729030 | 33.682545853 | 41.235591610 |
| 6 | 36.548664101 | 33.823309658 | 40.282453895 |
| 1 | 36.850592324 | 33.657033218 | 39.251838218 |
| 7 | 35.315170259 | 34.080636208 | 40.686105067 |
| 6 | 35.356116000 | 34.212052864 | 42.050214248 |
| 1 | 34.465185082 | 34.431684696 | 42.630285939 |
| 6 | 30.588356306 | 36.316894827 | 41.515039426 |
| 1 | 30.789165631 | 37.210417693 | 40.907180817 |
| 1 | 29.532897768 | 36.033730505 | 41.392415336 |
| 6 | 31.460679797 | 35.175593600 | 41.025089594 |
| 8 | 32.562404223 | 35.527985695 | 40.475627796 |
| 8 | 31.071120451 | 33.994010665 | 41.128333420 |
| 6 | 36.191701307 | 38.014588525 | 38.593209000 |
| 7 | 35.308600481 | 38.499852576 | 39.537794422 |
| 1 | 35.326170410 | 39.417969182 | 39.984471160 |
| 6 | 34.390141752 | 37.542388891 | 39.771279997 |
| 1 | 33.567492157 | 37.635912709 | 40.473410496 |
| 7 | 34.640948024 | 36.466162812 | 39.032905366 |
| 6 | 35.766090210 | 36.747448593 | 38.293252539 |
| 1 | 36.196988862 | 36.012559832 | 37.620101401 |
| 6 | 26.716383473 | 33.034353143 | 37.498757591 |
| 1 | 26.397074180 | 32.123091367 | 38.035061424 |
| 1 | 26.531983612 | 33.893792247 | 38.156334540 |
| 7 | 28.117192260 | 32.958186693 | 37.109275738 |
| 1 | 28.325392175 | 32.479440829 | 36.231805364 |
| 6 | 29.143985532 | 33.060758955 | 37.980124433 |
| 7 | 28.944022732 | 33.592800329 | 39.191384755 |
| 1 | 28.073625245 | 34.061008558 | 39.466058117 |
| 1 | 29.700951365 | 33.632885923 | 39.874976968 |

|    |              |              |              |    |              |              |              |
|----|--------------|--------------|--------------|----|--------------|--------------|--------------|
| 7  | 30.354068006 | 32.624610977 | 37.633071704 | 8  | 31.004153477 | 33.871055416 | 41.028177936 |
| 1  | 30.555173755 | 32.123337260 | 36.740713987 | 6  | 36.255938106 | 38.023907982 | 38.672778234 |
| 1  | 31.168195488 | 32.838865394 | 38.209444309 | 7  | 35.386487641 | 38.516784947 | 39.624116815 |
| 26 | 33.793352362 | 34.548801035 | 39.306156664 | 1  | 35.391793659 | 39.448258642 | 40.041263880 |
| 8  | 32.962560507 | 32.872101778 | 39.576219543 | 6  | 34.498283145 | 37.537247039 | 39.907518792 |
| 8  | 33.041190065 | 34.246575240 | 36.568003704 | 1  | 33.690176425 | 37.639906214 | 40.626611294 |
| 6  | 34.251185839 | 34.003591705 | 36.659495196 | 7  | 34.756187086 | 36.447094116 | 39.200677007 |
| 8  | 34.877673344 | 33.995576924 | 37.793005087 | 6  | 35.852477597 | 36.735991170 | 38.425592265 |
| 6  | 35.124162636 | 33.795131308 | 35.432339151 | 1  | 36.283250638 | 35.994970922 | 37.756408147 |
| 6  | 34.682300501 | 32.634028384 | 34.512860877 | 6  | 26.657029228 | 32.968631906 | 37.473096088 |
| 6  | 34.887075760 | 33.078263324 | 33.056985070 | 1  | 26.349690485 | 32.039957325 | 37.984050087 |
| 8  | 33.943401852 | 33.726774514 | 32.530752692 | 1  | 26.487804064 | 33.804737357 | 38.161653851 |
| 8  | 36.006697437 | 32.858001163 | 32.531264634 | 7  | 28.045238082 | 32.903168781 | 37.046988062 |
| 1  | 33.624368043 | 32.405013267 | 34.690870166 | 1  | 28.237803514 | 32.387889054 | 36.186336894 |
| 1  | 35.288325828 | 31.742530416 | 34.730167430 | 6  | 29.116860181 | 33.202392304 | 37.802524515 |
| 1  | 36.173391335 | 33.680814237 | 35.735182999 | 7  | 28.993471149 | 33.914723228 | 38.928962609 |
| 1  | 35.049463436 | 34.743918069 | 34.874474087 | 1  | 28.097622111 | 34.277424104 | 39.273783606 |
| 8  | 35.925106270 | 30.611125835 | 41.555674486 | 1  | 29.734779957 | 33.863029924 | 39.630790555 |
| 6  | 35.084254739 | 30.657342276 | 42.421806005 | 7  | 30.325188893 | 32.780876754 | 37.419584335 |
| 7  | 33.695672613 | 30.868214420 | 42.071173107 | 1  | 30.480386542 | 32.151768377 | 36.602822403 |
| 6  | 33.399461727 | 30.891271461 | 40.715167482 | 1  | 31.161802820 | 33.284477755 | 37.711587268 |
| 6  | 32.702982551 | 31.017102090 | 43.031649843 | 26 | 34.028024295 | 34.401750165 | 39.548470425 |
| 7  | 31.466999639 | 31.291123103 | 42.636672923 | 8  | 33.005141061 | 32.448361070 | 40.316049607 |
| 6  | 33.059308803 | 30.868183727 | 44.397253113 | 8  | 32.950138859 | 33.967206261 | 36.688534226 |
| 6  | 34.350960183 | 30.614833542 | 44.740300060 | 6  | 34.183208111 | 33.820564535 | 36.759425536 |
| 7  | 35.330255171 | 30.479217229 | 43.782692782 | 8  | 34.826469238 | 33.761733990 | 37.873402013 |
| 1  | 32.247182024 | 33.125316971 | 40.204250526 | 6  | 35.028195617 | 33.758778239 | 35.496667266 |
| 1  | 32.394039183 | 30.604042538 | 40.421346503 | 6  | 34.682366018 | 32.586758314 | 34.551389505 |
| 1  | 31.286663039 | 31.741175918 | 41.743510475 | 6  | 34.908228446 | 33.046021612 | 33.103153334 |
| 1  | 34.653011789 | 30.564086132 | 45.787120351 | 8  | 33.970236091 | 33.700856444 | 32.572290709 |
| 1  | 32.300401999 | 31.025674222 | 45.161793596 | 8  | 36.029715404 | 32.824191224 | 32.582955721 |
| 1  | 34.240929553 | 30.760759878 | 40.046856580 | 1  | 33.630035626 | 32.307544569 | 34.689743358 |
| 1  | 30.669996185 | 31.290236911 | 43.290578271 | 1  | 35.321906537 | 31.722476027 | 34.783140390 |
| 8  | 30.973018450 | 31.333990297 | 35.272868359 | 1  | 36.094075904 | 33.741951074 | 35.762556364 |
| 1  | 31.696498695 | 30.654332078 | 35.216617167 | 1  | 34.834830821 | 34.707851665 | 34.970707272 |
| 1  | 31.244843489 | 32.076194378 | 34.680703872 | 8  | 35.782382191 | 30.611768780 | 41.584150615 |
| 8  | 31.644372333 | 33.705158396 | 34.068646793 | 6  | 34.973680554 | 30.721011676 | 42.476043471 |
| 1  | 32.035697395 | 34.035742430 | 34.903551848 | 7  | 33.615244064 | 31.040556549 | 42.204193059 |
| 1  | 32.399676906 | 33.739157325 | 33.422508100 | 6  | 33.228564437 | 31.156858468 | 40.754676729 |
| 1  | 37.113682848 | 34.241441823 | 43.441194764 | 6  | 32.654975501 | 31.149797799 | 43.179704499 |
| 1  | 30.775981995 | 36.590325348 | 42.553355214 | 7  | 31.410872152 | 31.460212396 | 42.858609110 |
| 1  | 37.102879774 | 38.525666784 | 38.282371205 | 6  | 33.037726489 | 30.925640227 | 44.535316241 |
| 1  | 26.060519302 | 33.158114075 | 36.637019382 | 6  | 34.336669836 | 30.648316232 | 44.820312983 |
| 1  | 36.279682215 | 30.367546595 | 44.076104527 | 7  | 35.280612657 | 30.524134228 | 43.833255763 |

**PD**

**QM/MM (BS1) = -3370.577826 a.u.**

**QM/MM (BS2+ZPE) = -3372.485246 a.u.**

|   |              |              |              |   |              |              |              |
|---|--------------|--------------|--------------|---|--------------|--------------|--------------|
| 6 | 36.890681544 | 33.969772802 | 42.641096544 | 1 | 34.068586234 | 30.730353496 | 40.198850674 |
| 7 | 37.632200494 | 33.736128521 | 41.509184762 | 1 | 30.634195031 | 31.372834606 | 43.530583543 |
| 1 | 38.647174813 | 33.697476721 | 41.401087704 | 8 | 30.932821368 | 31.256738372 | 35.206406581 |
| 6 | 36.799788774 | 33.668936393 | 40.457985434 | 1 | 31.662921483 | 30.582506559 | 35.192330164 |
| 1 | 37.122240586 | 33.494292248 | 39.434138394 | 1 | 31.227416978 | 31.995295612 | 34.621905126 |
| 7 | 35.553298915 | 33.856919959 | 40.852921009 | 8 | 31.661209430 | 33.656151714 | 34.089322928 |
| 6 | 35.586471016 | 34.041244725 | 42.211742677 | 1 | 32.044823613 | 33.917485756 | 34.952209087 |
| 1 | 34.683999223 | 34.236859450 | 42.783377780 | 1 | 32.427874316 | 33.706466744 | 33.451766352 |
| 6 | 30.623016755 | 36.180831837 | 41.574976518 | 1 | 37.329187071 | 34.244027399 | 43.600557138 |
| 1 | 30.823862275 | 37.052008002 | 40.932952744 | 1 | 30.820938142 | 36.502685843 | 42.597377830 |
| 1 | 29.565749218 | 35.902717627 | 41.469415340 | 1 | 37.153979246 | 38.540521795 | 38.334104948 |
| 6 | 31.499481771 | 35.034175986 | 41.107662412 | 1 | 25.990470887 | 33.121327266 | 36.624301988 |
| 8 | 32.676015271 | 35.319471433 | 40.750006649 | 1 | 36.240039045 | 30.409632496 | 44.090865651 |

**Snapshot 5****RC2****QM/MM (BS1) = -3369.803340 a.u.****QM/MM (BS2+ZPE) = -3371.752763 a.u.**

|    |              |              |              |
|----|--------------|--------------|--------------|
| 6  | 27.876122977 | 22.152655995 | 36.130907149 |
| 7  | 29.183237979 | 22.358925482 | 36.508160822 |
| 1  | 29.799117650 | 21.655490652 | 36.934042270 |
| 6  | 29.504247164 | 23.634600630 | 36.227433540 |
| 1  | 30.479623384 | 24.072597628 | 36.423391029 |
| 7  | 28.470194332 | 24.267193385 | 35.684773977 |
| 6  | 27.439538141 | 23.352999042 | 35.615300068 |
| 1  | 26.474859653 | 23.633963030 | 35.196291141 |
| 6  | 24.099329271 | 26.985660418 | 35.126197645 |
| 1  | 24.133967435 | 27.667703363 | 35.987031771 |
| 1  | 23.849179448 | 27.584387406 | 34.236890163 |
| 6  | 25.459584390 | 26.336041305 | 34.884707708 |
| 8  | 26.437929696 | 26.899175525 | 35.567146209 |
| 8  | 25.620843002 | 25.389351631 | 34.129760695 |
| 6  | 28.744303739 | 26.173446499 | 39.707386787 |
| 7  | 27.401683060 | 26.480281169 | 39.614320067 |
| 1  | 26.757370405 | 26.635021021 | 40.386249780 |
| 6  | 27.103406615 | 26.668943315 | 38.314817438 |
| 1  | 26.117168578 | 26.946849944 | 37.955948653 |
| 7  | 28.182662032 | 26.483498466 | 37.566197104 |
| 6  | 29.217300939 | 26.181294949 | 38.422268651 |
| 1  | 30.222889490 | 26.002656860 | 38.054411928 |
| 6  | 26.289576574 | 31.862606052 | 30.619661464 |
| 1  | 26.341992448 | 31.468355883 | 29.593720258 |
| 1  | 25.368802048 | 31.498689016 | 31.096929880 |
| 7  | 27.477494988 | 31.516594146 | 31.407110258 |
| 1  | 28.219075306 | 32.215652549 | 31.455893881 |
| 6  | 27.748558922 | 30.395415344 | 32.094167396 |
| 7  | 26.917613859 | 29.351437820 | 32.135466114 |
| 1  | 26.044766155 | 29.298064754 | 31.600133168 |
| 1  | 27.211253854 | 28.515222289 | 32.633307269 |
| 7  | 28.899805173 | 30.352578896 | 32.776706662 |
| 1  | 29.499006108 | 31.174946779 | 32.757147763 |
| 1  | 29.201177305 | 29.568028877 | 33.361629681 |
| 26 | 28.317247709 | 26.407441334 | 35.449018347 |
| 8  | 28.370287906 | 26.541500113 | 33.834497698 |
| 8  | 30.500407169 | 28.848917758 | 34.587366695 |
| 6  | 30.891616506 | 27.886472657 | 35.249226868 |
| 8  | 30.106947062 | 26.991273173 | 35.783328836 |
| 6  | 32.363935708 | 27.618628000 | 35.539356201 |
| 6  | 33.399286389 | 28.604400128 | 34.981805658 |
| 6  | 34.651678686 | 27.886156151 | 34.413367569 |
| 8  | 34.420325647 | 26.844381787 | 33.730771654 |
| 8  | 35.784833023 | 28.363897673 | 34.638029511 |
| 1  | 33.703883058 | 29.351209474 | 35.729971307 |
| 1  | 32.950280219 | 29.167744029 | 34.145565823 |
| 1  | 32.551154507 | 26.636887181 | 35.085627552 |
| 1  | 32.465963913 | 27.476151550 | 36.627949723 |
| 8  | 29.543475883 | 21.201387705 | 31.443638014 |
| 6  | 28.373856466 | 21.347103894 | 31.706397722 |
| 7  | 27.728400348 | 22.595948507 | 31.520986487 |
| 6  | 28.579329208 | 23.726536049 | 31.105120179 |
| 6  | 26.391067722 | 22.795099306 | 31.731536452 |
| 7  | 25.870902695 | 23.995379539 | 31.556563084 |
| 6  | 25.591710307 | 21.681349888 | 32.135872972 |
| 6  | 26.202370126 | 20.495436499 | 32.392570039 |

|   |              |              |              |
|---|--------------|--------------|--------------|
| 7 | 27.555675688 | 20.336340127 | 32.230538791 |
| 1 | 28.619892290 | 24.484969884 | 31.904674865 |
| 1 | 28.186008719 | 24.172255727 | 30.179336716 |
| 1 | 26.458140478 | 24.815581832 | 31.453053040 |
| 1 | 25.631401728 | 19.636947179 | 32.749900866 |
| 1 | 24.517699772 | 21.802761119 | 32.269636989 |
| 1 | 29.587387689 | 23.343819234 | 30.922126474 |
| 1 | 24.884787781 | 24.188818562 | 31.785866826 |
| 8 | 26.647010712 | 29.483422008 | 36.635842306 |
| 1 | 27.462083981 | 29.944892329 | 36.303736708 |
| 1 | 26.565727573 | 28.659565041 | 36.125337167 |
| 8 | 31.852331874 | 26.697729716 | 32.614957265 |
| 1 | 31.564276202 | 27.611352749 | 32.751517677 |
| 1 | 32.775474510 | 26.690509161 | 32.964278518 |
| 1 | 27.354783589 | 21.214048615 | 36.318760156 |
| 1 | 23.321336800 | 26.242348568 | 35.300216414 |
| 1 | 29.235788905 | 25.871784087 | 40.632324323 |
| 1 | 26.252043122 | 32.951283761 | 30.581722011 |
| 1 | 27.992827119 | 19.489404957 | 32.533147357 |

**TS7****QM/MM (BS1) = -3369.767004 a.u.****QM/MM (BS2+ZPE) = -3371.719255 a.u.**

|    |              |              |              |
|----|--------------|--------------|--------------|
| 6  | 27.809743914 | 21.829926174 | 36.205695775 |
| 7  | 29.118068324 | 22.042902639 | 36.569311804 |
| 1  | 29.741807738 | 21.360936519 | 37.015874313 |
| 6  | 29.443345044 | 23.305898731 | 36.248146739 |
| 1  | 30.421606025 | 23.740999505 | 36.432272724 |
| 7  | 28.409192663 | 23.923845866 | 35.692708180 |
| 6  | 27.372606125 | 23.014361845 | 35.661491770 |
| 1  | 26.395456691 | 23.298680272 | 35.277717877 |
| 6  | 24.128941035 | 26.907890598 | 35.172860167 |
| 1  | 24.198316484 | 27.590743179 | 36.033443114 |
| 1  | 23.892991890 | 27.538122381 | 34.300636024 |
| 6  | 25.474242891 | 26.236473806 | 34.916770150 |
| 8  | 26.528299607 | 26.993780537 | 35.130385654 |
| 8  | 25.582262234 | 25.080737592 | 34.518730046 |
| 6  | 28.678978120 | 26.058289761 | 39.515302468 |
| 7  | 27.343823497 | 26.392269092 | 39.424803506 |
| 1  | 26.717561448 | 26.606572177 | 40.196974079 |
| 6  | 27.033672156 | 26.512963823 | 36.115842485 |
| 1  | 26.045251876 | 26.804687947 | 37.772551699 |
| 7  | 28.090243253 | 26.255841990 | 37.360198143 |
| 6  | 29.127179794 | 25.980886592 | 38.221601130 |
| 1  | 30.124551927 | 25.757371542 | 37.853994337 |
| 6  | 26.272428760 | 31.885694267 | 30.563108561 |
| 1  | 26.275974453 | 31.503340368 | 29.531826295 |
| 1  | 25.370016976 | 31.523947525 | 31.074468328 |
| 7  | 27.485222653 | 31.510074773 | 31.292552771 |
| 1  | 28.270873403 | 32.157491952 | 31.244672824 |
| 6  | 27.699684016 | 30.455432882 | 32.093875258 |
| 7  | 26.813719527 | 29.464985054 | 32.225824007 |
| 1  | 25.976817791 | 29.368477073 | 31.641338962 |
| 1  | 26.984861275 | 28.733471026 | 32.906984402 |
| 7  | 28.840715521 | 30.429485829 | 32.790912748 |
| 1  | 29.445289469 | 31.247877871 | 32.743107733 |
| 1  | 29.167739600 | 29.631744231 | 33.347784526 |
| 26 | 28.270743120 | 25.988809201 | 35.117437751 |
| 8  | 28.282137581 | 25.613541827 | 33.408781761 |
| 8  | 30.393372212 | 28.770225836 | 34.448480782 |
| 6  | 30.776783953 | 27.761685857 | 35.045763195 |

|   |              |              |              |    |              |              |              |
|---|--------------|--------------|--------------|----|--------------|--------------|--------------|
| 8 | 29.996055493 | 26.782265093 | 35.400350206 | 6  | 42.572583505 | 27.244276610 | 26.735013640 |
| 6 | 32.227448809 | 27.564424776 | 35.481377187 | 1  | 41.971055433 | 26.835615235 | 25.928593186 |
| 6 | 33.287775889 | 28.527835890 | 34.919025440 | 7  | 42.444427983 | 28.460734765 | 27.243682529 |
| 6 | 34.556449059 | 27.800149862 | 34.395378982 | 6  | 43.404275295 | 28.588555868 | 28.220066111 |
| 8 | 34.348700850 | 26.736580417 | 33.737442325 | 1  | 43.508174088 | 29.506127585 | 28.793541978 |
| 8 | 35.682334559 | 28.293938504 | 34.623332719 | 6  | 33.383600999 | 32.044620588 | 25.929921161 |
| 1 | 33.583264930 | 29.290190337 | 35.654945821 | 1  | 33.357730084 | 33.141262711 | 25.872465302 |
| 1 | 32.865888439 | 29.079556746 | 34.061385057 | 1  | 32.723641535 | 31.681948204 | 25.128348764 |
| 1 | 32.485310649 | 26.544041455 | 35.177427490 | 7  | 34.700359659 | 31.505984275 | 25.669825855 |
| 1 | 32.224316122 | 27.564786353 | 36.585772079 | 1  | 34.744457909 | 30.621333257 | 25.147507822 |
| 8 | 29.669255389 | 21.439353025 | 31.686567831 | 6  | 35.903213593 | 31.942306485 | 26.083578274 |
| 6 | 28.484072001 | 21.524620213 | 31.889860479 | 7  | 36.066906616 | 33.084130465 | 26.766013504 |
| 7 | 27.812006417 | 22.780994197 | 31.797537285 | 1  | 35.342371060 | 33.807238855 | 26.810718996 |
| 6 | 28.619942413 | 23.948438850 | 31.555221228 | 1  | 37.017334467 | 33.332392173 | 27.052663703 |
| 6 | 26.445544413 | 22.913426614 | 31.905150146 | 7  | 36.949893615 | 31.157719334 | 25.819801683 |
| 7 | 25.923377112 | 24.124097385 | 31.864275527 | 1  | 36.786167815 | 30.308514709 | 25.270980893 |
| 6 | 25.660136212 | 21.732329146 | 32.058332640 | 1  | 37.916748610 | 31.434085713 | 26.000808105 |
| 6 | 26.291773405 | 20.545091995 | 32.260547819 | 26 | 41.095966171 | 29.967759242 | 26.517693794 |
| 7 | 27.660309371 | 20.443383805 | 32.230895467 | 6  | 39.798328115 | 32.330492066 | 27.576931579 |
| 1 | 28.561937702 | 24.769786521 | 32.555899676 | 8  | 38.946615205 | 33.179821492 | 27.815446640 |
| 1 | 28.243875082 | 24.546842833 | 30.713363567 | 8  | 39.839629325 | 31.554557603 | 26.542425496 |
| 1 | 26.499647680 | 24.927909816 | 32.121449240 | 6  | 40.992412724 | 32.105112417 | 28.541867396 |
| 1 | 25.725110907 | 19.637924643 | 32.477905628 | 8  | 41.892536266 | 31.362418514 | 28.135550197 |
| 1 | 24.574071908 | 21.805131288 | 32.102678392 | 6  | 41.048021739 | 32.862309184 | 29.840968363 |
| 1 | 29.676305141 | 23.682582179 | 31.470929965 | 6  | 42.082413165 | 32.355451123 | 30.852514921 |
| 1 | 24.907453744 | 24.260062907 | 31.971390829 | 6  | 42.010613009 | 33.097943838 | 32.213062665 |
| 8 | 26.682418369 | 29.392115500 | 36.595580094 | 8  | 41.533337841 | 32.456391615 | 33.183836323 |
| 1 | 27.497766917 | 29.879320574 | 36.303756087 | 8  | 42.442443124 | 34.278504641 | 32.248606109 |
| 1 | 26.628314118 | 28.610053313 | 36.015929628 | 1  | 43.092929553 | 32.488826735 | 30.433171718 |
| 8 | 31.829454431 | 26.581084678 | 32.566225279 | 1  | 41.920777816 | 31.280719828 | 31.019393893 |
| 1 | 31.598352000 | 27.519697530 | 32.622290090 | 1  | 40.028214734 | 32.852938730 | 30.259891209 |
| 1 | 32.738846491 | 26.550161004 | 32.952819661 | 1  | 41.233353968 | 33.925318537 | 29.591677798 |
| 1 | 27.266107500 | 20.915713648 | 36.443902040 | 8  | 40.084527131 | 29.368527763 | 28.270174635 |
| 1 | 23.326717268 | 26.191969820 | 35.351638785 | 8  | 39.563639534 | 30.184155446 | 29.083592892 |
| 1 | 29.182748485 | 25.821010588 | 40.452309055 | 8  | 44.872894760 | 35.313321097 | 23.973951458 |
| 1 | 26.247677880 | 32.975167123 | 30.540667440 | 6  | 44.094829628 | 34.718441608 | 23.251651279 |
| 1 | 28.094795272 | 19.591406455 | 32.523006902 | 7  | 42.741775145 | 34.593958751 | 23.622222946 |

**Dioxygen activation step reaction states cartesian coordinates for AlkB-dsDNA**

**RC1**

**QM/MM (BS1) = -3412.915331 a.u.**

**QM/MM (BS2+ZPE) = -3414.926892 a.u.**

|   |              |              |              |
|---|--------------|--------------|--------------|
| 6 | 44.351819855 | 30.348043233 | 23.773765187 |
| 7 | 44.848874081 | 31.121427882 | 24.804058722 |
| 1 | 45.801263582 | 31.507500225 | 24.871066448 |
| 6 | 43.869955417 | 31.282940584 | 25.716041460 |
| 1 | 43.991825758 | 31.830645466 | 26.647504646 |
| 7 | 42.760615755 | 30.655116255 | 25.328300790 |
| 6 | 43.050390983 | 30.066504828 | 24.111726364 |
| 1 | 42.309251115 | 29.479193405 | 23.574289214 |
| 6 | 38.799762279 | 27.301256167 | 23.895628902 |
| 1 | 38.525344584 | 26.344675885 | 24.369584637 |
| 1 | 37.863991083 | 27.722202651 | 23.495658671 |
| 6 | 39.192737115 | 28.236747487 | 25.049625229 |
| 8 | 40.374618437 | 28.780152196 | 25.105501754 |
| 8 | 38.332156714 | 28.432115817 | 25.909685428 |
| 6 | 44.121528266 | 27.420440304 | 28.292152647 |
| 7 | 43.569308094 | 26.579396692 | 27.347673410 |
| 1 | 43.847022436 | 25.617777018 | 27.120093416 |

**TS1**

**QM/MM (BS1) = -3412.895796 a.u.**

**QM/MM (BS2+ZPE) = -3414.905834 a.u.**

|   |              |              |              |
|---|--------------|--------------|--------------|
| 6 | 44.364245735 | 30.329393640 | 23.759372661 |
| 7 | 44.846202514 | 31.122683524 | 24.783071203 |

|    |              |              |              |
|----|--------------|--------------|--------------|
| 1  | 45.794526129 | 31.519036157 | 24.848011010 |
| 6  | 43.863657769 | 31.279775469 | 25.690958776 |
| 1  | 43.960334473 | 31.840426746 | 26.617985356 |
| 7  | 42.767769591 | 30.626690949 | 25.304468489 |
| 6  | 43.067808017 | 30.027742441 | 24.096917942 |
| 1  | 42.336843232 | 29.423470866 | 23.565275420 |
| 6  | 38.826579929 | 27.354731349 | 23.935751804 |
| 1  | 38.542236531 | 26.397547571 | 24.403399455 |
| 1  | 37.895057729 | 27.782736813 | 23.532224698 |
| 6  | 39.215930340 | 28.281184946 | 25.103012636 |
| 8  | 40.407297884 | 28.795209141 | 25.199419322 |
| 8  | 38.338787754 | 28.489319761 | 25.942831895 |
| 6  | 44.170759213 | 27.396924122 | 28.306512538 |
| 7  | 43.614882162 | 26.553426742 | 27.365408002 |
| 1  | 43.882291428 | 25.587644691 | 27.144706148 |
| 6  | 42.631485325 | 27.225438953 | 26.738908554 |
| 1  | 42.024395187 | 26.825503066 | 25.933430035 |
| 7  | 42.518694279 | 28.445898297 | 27.235375155 |
| 6  | 43.468272737 | 28.572908309 | 28.220164517 |
| 1  | 43.574479585 | 29.496802387 | 28.783722740 |
| 6  | 33.327509115 | 32.045771655 | 25.906301335 |
| 1  | 33.286637274 | 33.142167594 | 25.851753834 |
| 1  | 32.656202091 | 31.677372281 | 25.117010020 |
| 7  | 34.644615333 | 31.523855697 | 25.618061667 |
| 1  | 34.690881750 | 30.636590717 | 25.100458874 |
| 6  | 35.848719258 | 31.973904865 | 26.012252500 |
| 7  | 36.008799017 | 33.119356324 | 26.689252481 |
| 1  | 35.276148242 | 33.833828066 | 26.750869097 |
| 1  | 36.956663920 | 33.380706600 | 26.968295270 |
| 7  | 36.898190823 | 31.196861839 | 25.735789535 |
| 1  | 36.727906680 | 30.348798438 | 25.186972877 |
| 1  | 37.869005688 | 31.478726233 | 25.879960082 |
| 26 | 41.176522803 | 29.995391169 | 26.581367285 |
| 6  | 39.665951605 | 32.269524036 | 27.536665006 |
| 8  | 38.894100803 | 33.174876479 | 27.802518840 |
| 8  | 39.755821058 | 31.561437923 | 26.469273436 |
| 6  | 40.795767220 | 31.709803147 | 28.627546383 |
| 8  | 41.859057116 | 31.316236294 | 27.977305662 |
| 6  | 40.918849694 | 32.586359225 | 29.873170296 |
| 6  | 42.071354705 | 32.225740434 | 30.824088297 |
| 6  | 42.015027067 | 33.017483612 | 32.161579836 |
| 8  | 41.485141049 | 32.423805007 | 33.138018977 |
| 8  | 42.491639071 | 34.180160701 | 32.179006172 |
| 1  | 43.028496936 | 32.435919202 | 30.321666107 |
| 1  | 42.028451945 | 31.149559426 | 31.046809794 |
| 1  | 39.951763365 | 32.540889352 | 30.399531089 |
| 1  | 41.022148776 | 33.626797670 | 29.525533224 |
| 8  | 40.287975125 | 29.421252560 | 28.295940545 |
| 8  | 39.998245538 | 30.467679345 | 29.049142078 |
| 8  | 44.897381034 | 35.309794617 | 23.986222095 |
| 6  | 44.115188744 | 34.718287300 | 23.265765008 |
| 7  | 42.764824328 | 34.589139984 | 23.644167334 |
| 6  | 42.376066252 | 35.299433237 | 24.863481639 |
| 6  | 41.849960538 | 33.837255177 | 22.952797925 |
| 7  | 40.616497918 | 33.721998414 | 23.415749319 |
| 6  | 42.268083898 | 33.189108696 | 21.759719128 |
| 6  | 43.551362582 | 33.348473001 | 21.343605705 |
| 7  | 44.436997002 | 34.123473599 | 22.052732836 |
| 1  | 43.035594801 | 36.164022103 | 24.975493487 |
| 1  | 42.463738693 | 34.643296835 | 25.744543148 |
| 1  | 40.333649646 | 34.086626780 | 24.315375238 |
| 1  | 43.912299059 | 32.829628817 | 20.452777066 |

|   |              |              |              |
|---|--------------|--------------|--------------|
| 1 | 41.574491209 | 32.576469664 | 21.187882948 |
| 1 | 41.347820675 | 35.661786448 | 24.763095381 |
| 1 | 39.920715715 | 33.159948352 | 22.902585058 |
| 1 | 44.985827154 | 29.952211094 | 22.947315284 |
| 1 | 39.484865748 | 27.114759341 | 23.100802378 |
| 1 | 45.072967464 | 27.168286990 | 28.873797873 |
| 1 | 32.902129460 | 31.708941297 | 26.851639786 |
| 1 | 45.377902129 | 34.209704503 | 21.725266392 |

**IMI**

**QM/MM (BS1) = -3412.989066 a.u.**

**QM/MM (BS2+ZPE) = -3414.994183 a.u.**

|    |              |              |              |
|----|--------------|--------------|--------------|
| 6  | 44.403438222 | 30.402143188 | 23.709171192 |
| 7  | 44.904872459 | 31.169541873 | 24.741349382 |
| 1  | 45.864401047 | 31.531520215 | 24.822957843 |
| 6  | 43.910514726 | 31.365776805 | 25.633447443 |
| 1  | 44.033171832 | 31.921771847 | 26.560725610 |
| 7  | 42.791584689 | 30.772039265 | 25.230655147 |
| 6  | 43.087215243 | 30.165926904 | 24.025236079 |
| 1  | 42.338947701 | 29.589682228 | 23.484598819 |
| 6  | 38.777161172 | 27.278493920 | 23.840535973 |
| 1  | 38.488878615 | 26.337601441 | 24.336101973 |
| 1  | 37.846025790 | 27.720654924 | 23.451185927 |
| 6  | 39.258450843 | 28.230269739 | 24.950526566 |
| 8  | 40.402074529 | 28.800382605 | 24.868890651 |
| 8  | 38.473935755 | 28.402976339 | 25.904336394 |
| 6  | 43.967767894 | 27.479422056 | 28.235891109 |
| 7  | 43.439868963 | 26.650815200 | 27.267239669 |
| 1  | 43.756579149 | 25.711412291 | 27.004763378 |
| 6  | 42.401616930 | 27.295473985 | 26.696241378 |
| 1  | 41.822655580 | 26.897511881 | 25.867675121 |
| 7  | 42.214864103 | 28.483504035 | 27.255122468 |
| 6  | 43.191673811 | 28.612985585 | 28.218463546 |
| 1  | 43.267671199 | 29.513864453 | 28.820901913 |
| 6  | 33.358158585 | 31.888372544 | 25.944919494 |
| 1  | 33.333439578 | 32.982371167 | 25.835969895 |
| 1  | 32.706043365 | 31.489941071 | 25.154816242 |
| 7  | 34.676436148 | 31.333431634 | 25.722476959 |
| 1  | 34.738908004 | 30.461433508 | 25.179485940 |
| 6  | 35.856463365 | 31.753060985 | 26.205097321 |
| 7  | 35.949630688 | 32.908015890 | 28.93562150  |
| 1  | 35.233888814 | 33.640629464 | 26.842235386 |
| 1  | 36.852253348 | 33.195018219 | 27.248965607 |
| 7  | 36.921179436 | 30.977089580 | 26.031993642 |
| 1  | 36.813246074 | 30.125409744 | 25.473797398 |
| 1  | 37.886582448 | 31.240963926 | 26.298539476 |
| 26 | 41.075496675 | 30.095369860 | 26.320679554 |
| 6  | 38.786072385 | 35.058234003 | 26.710541584 |
| 8  | 38.084899173 | 34.993403700 | 27.636880630 |
| 8  | 39.497906824 | 35.122210485 | 25.796721024 |
| 6  | 40.728587713 | 31.833741380 | 28.760557122 |
| 8  | 41.699817998 | 31.257117226 | 28.285479309 |
| 6  | 40.617589933 | 32.347548618 | 30.179406345 |
| 6  | 41.839431636 | 33.121985768 | 30.678298875 |
| 6  | 41.831125130 | 33.410347681 | 32.199998205 |
| 8  | 41.301322695 | 32.561858609 | 32.960578680 |
| 8  | 42.394166289 | 34.473838977 | 32.561222803 |
| 1  | 41.950028485 | 34.081680026 | 30.151213258 |
| 1  | 42.750359448 | 32.536717049 | 30.460833231 |
| 1  | 40.486366067 | 31.464955983 | 30.828330637 |
| 1  | 39.699400058 | 32.946802085 | 30.268691930 |

|   |              |              |              |
|---|--------------|--------------|--------------|
| 8 | 39.636265571 | 31.469194640 | 26.743808550 |
| 8 | 39.613085168 | 32.030941394 | 28.068989446 |
| 8 | 45.020920813 | 35.299577824 | 23.849431522 |
| 6 | 44.237755667 | 34.696136501 | 23.138029701 |
| 7 | 42.884816730 | 34.594090252 | 23.503455818 |
| 6 | 42.483084164 | 35.356143919 | 24.683353455 |
| 6 | 41.966987854 | 33.830014074 | 22.828955367 |
| 7 | 40.725543304 | 33.761210173 | 23.275633756 |
| 6 | 42.392783390 | 33.127262729 | 21.670882931 |
| 6 | 43.676880574 | 33.272861214 | 21.255304739 |
| 7 | 44.561452358 | 34.067578860 | 21.944622914 |
| 1 | 43.205143668 | 36.163345921 | 24.824506041 |
| 1 | 42.457827751 | 34.710203583 | 25.575659322 |
| 1 | 40.424882476 | 34.200906142 | 24.136716331 |
| 1 | 44.037826036 | 32.731666064 | 20.379326729 |
| 1 | 41.700101013 | 32.496276831 | 21.118626124 |
| 1 | 41.496256586 | 35.791033176 | 24.510909285 |
| 1 | 40.026860311 | 33.184198582 | 22.783348025 |
| 1 | 45.017326361 | 29.996414598 | 22.905061131 |
| 1 | 39.423512906 | 27.024083189 | 23.000552679 |
| 1 | 44.865123114 | 27.253750396 | 28.811992865 |
| 1 | 32.899289593 | 31.606015079 | 26.892432468 |
| 1 | 45.502863309 | 34.152520662 | 21.618275230 |

**TS2**

**QM/MM (BS1) = -3412.976382 a.u.**

**QM/MM (BS2+ZPE) = -3414.994860 a.u.**

|   |              |              |              |
|---|--------------|--------------|--------------|
| 6 | 44.388843439 | 30.385732597 | 23.715280443 |
| 7 | 44.880767070 | 31.157011173 | 24.749903474 |
| 1 | 45.837592648 | 31.527723834 | 24.832617508 |
| 6 | 43.886492143 | 31.343164183 | 25.641019726 |
| 1 | 43.999936558 | 31.898538473 | 26.569568818 |
| 7 | 42.774288102 | 30.734685923 | 25.234330537 |
| 6 | 43.076301677 | 30.130673714 | 24.028503039 |
| 1 | 42.334006646 | 29.547520285 | 23.487633873 |
| 6 | 38.808986056 | 27.298401182 | 23.833422243 |
| 1 | 38.500004720 | 26.356315043 | 24.313920583 |
| 1 | 37.887892087 | 27.762797224 | 23.445710165 |
| 6 | 39.291286011 | 28.217622302 | 24.971650888 |
| 8 | 40.451911606 | 28.767110623 | 24.932847505 |
| 8 | 38.493042462 | 28.374831941 | 25.911726767 |
| 6 | 43.950358820 | 27.472008410 | 28.259174892 |
| 7 | 43.431804894 | 26.650280207 | 27.278931216 |
| 1 | 43.758062640 | 25.717128739 | 27.005427569 |
| 6 | 42.382663357 | 27.285262584 | 26.720112575 |
| 1 | 41.809909642 | 26.892071627 | 25.885649505 |
| 7 | 42.178817406 | 28.461968447 | 27.298300834 |
| 6 | 43.155687551 | 28.592609869 | 28.262568977 |
| 1 | 43.212922976 | 29.485506495 | 28.878857247 |
| 6 | 33.361671746 | 31.914914948 | 25.941458045 |
| 1 | 33.348795958 | 33.010356823 | 25.848849116 |
| 1 | 32.700255891 | 31.536953236 | 25.148885414 |
| 7 | 34.671553980 | 31.348343791 | 25.699996102 |
| 1 | 34.717023323 | 30.482862784 | 25.146128331 |
| 6 | 35.860000831 | 31.721852143 | 26.203173497 |
| 7 | 35.984625190 | 32.857704998 | 26.917724055 |
| 1 | 35.291956592 | 33.612781368 | 26.877041734 |
| 1 | 36.891620236 | 33.099521083 | 27.296630941 |
| 7 | 36.898588288 | 30.915697558 | 26.015905865 |
| 1 | 36.754843496 | 30.090361525 | 25.426231512 |
| 1 | 37.878774639 | 31.135232799 | 26.272578585 |

|    |              |              |              |
|----|--------------|--------------|--------------|
| 26 | 41.085800502 | 30.110035520 | 26.366911235 |
| 6  | 38.780023709 | 35.022617543 | 26.752551410 |
| 8  | 38.066755088 | 34.997026992 | 27.670537732 |
| 8  | 39.499960476 | 35.053394810 | 25.842337262 |
| 6  | 40.691354458 | 31.873958460 | 28.728519419 |
| 8  | 41.637977763 | 31.183020933 | 28.305224722 |
| 6  | 40.635326161 | 32.397419345 | 30.161535706 |
| 6  | 41.898703631 | 33.088810509 | 30.674822922 |
| 6  | 41.876332372 | 33.391960041 | 32.194846474 |
| 8  | 41.329463246 | 32.556222474 | 32.957725605 |
| 8  | 42.441284427 | 34.455742787 | 32.554990280 |
| 1  | 42.079581866 | 34.036696240 | 30.146357903 |
| 1  | 42.772006708 | 32.442198282 | 28.472797226 |
| 1  | 40.439763401 | 31.519479544 | 30.801266534 |
| 1  | 39.760347529 | 33.057529323 | 30.254663441 |
| 8  | 39.644126086 | 31.181931230 | 26.588518602 |
| 8  | 39.645344708 | 32.159470567 | 28.030222625 |
| 8  | 45.005185251 | 35.303043887 | 23.853542086 |
| 6  | 44.221681029 | 34.702322615 | 23.140459894 |
| 7  | 42.868090771 | 34.602394276 | 23.504666199 |
| 6  | 42.466155387 | 35.367155145 | 24.683274402 |
| 6  | 41.949640842 | 33.839329282 | 22.829421006 |
| 7  | 40.708423139 | 33.769242824 | 23.275804469 |
| 6  | 42.376180020 | 33.136756010 | 21.670912988 |
| 6  | 43.660987989 | 33.280298482 | 21.256635366 |
| 7  | 44.546314423 | 34.073167797 | 21.947298609 |
| 1  | 43.180452067 | 36.182742098 | 24.816244145 |
| 1  | 42.451375022 | 34.726939269 | 25.579753457 |
| 1  | 40.406904679 | 34.202442598 | 24.140307900 |
| 1  | 44.022279829 | 32.738145066 | 20.381218453 |
| 1  | 41.682825381 | 32.507991106 | 21.116920628 |
| 1  | 41.473629544 | 35.790312976 | 24.514580823 |
| 1  | 40.010267561 | 33.194009724 | 22.780386464 |
| 1  | 45.008399389 | 29.986843962 | 22.912095781 |
| 1  | 39.452227905 | 27.038553398 | 22.992716369 |
| 1  | 44.853863747 | 27.250623509 | 28.827272514 |
| 1  | 32.904623705 | 31.623066932 | 26.886973327 |
| 1  | 45.488170872 | 34.156588066 | 21.621845097 |

**IM2**

**QM/MM (BS1) = -3412.986491 a.u.**

**QM/MM (BS2+ZPE) = -3414.995616 a.u.**

|   |              |              |              |
|---|--------------|--------------|--------------|
| 6 | 44.400980310 | 30.385265503 | 23.704762098 |
| 7 | 44.885473652 | 31.161639161 | 24.738407887 |
| 1 | 45.841088996 | 31.536668184 | 24.823504325 |
| 6 | 43.888188902 | 31.350778895 | 25.623909187 |
| 1 | 43.995139402 | 31.916259587 | 26.547075160 |
| 7 | 42.780849360 | 30.735544497 | 25.212366046 |
| 6 | 43.088208847 | 30.126535966 | 24.010761959 |
| 1 | 42.351067950 | 29.543645099 | 23.463156181 |
| 6 | 38.808465382 | 27.318969058 | 23.863555459 |
| 1 | 38.491882844 | 26.379265238 | 24.343321438 |
| 1 | 37.892016437 | 27.790197578 | 23.471709707 |
| 6 | 39.290132902 | 28.237639400 | 24.997229024 |
| 8 | 40.439728533 | 28.821593987 | 24.927721238 |
| 8 | 38.525923679 | 28.387964495 | 25.960951586 |
| 6 | 43.918311402 | 27.519890034 | 28.211569493 |
| 7 | 43.409919997 | 26.687902508 | 27.234297692 |
| 1 | 43.729199074 | 25.745461180 | 26.985602319 |
| 6 | 42.388910045 | 27.332434121 | 26.635538858 |
| 1 | 41.826086680 | 26.927751477 | 25.800756631 |

|    |              |              |              |    |              |              |              |
|----|--------------|--------------|--------------|----|--------------|--------------|--------------|
| 7  | 42.192738991 | 28.523674255 | 27.184458652 | 1  | 43.798722789 | 31.692787754 | 26.636500008 |
| 6  | 43.142346839 | 28.653442535 | 28.174561895 | 7  | 42.654265204 | 30.454638962 | 25.306535767 |
| 1  | 43.187170290 | 29.550348769 | 28.785837205 | 6  | 42.976070002 | 29.897301954 | 24.086163002 |
| 6  | 33.368101651 | 31.945583309 | 25.937752080 | 1  | 42.262084240 | 29.288850889 | 23.537105003 |
| 1  | 33.344483534 | 33.041313475 | 25.852160284 | 6  | 38.787634256 | 27.318088830 | 23.890803086 |
| 1  | 32.708364812 | 31.565702970 | 25.144554093 | 1  | 38.595952017 | 26.369163202 | 24.419866472 |
| 7  | 34.683906077 | 31.395907417 | 25.688384974 | 1  | 37.818653827 | 27.642765102 | 23.484679180 |
| 1  | 34.735066563 | 30.527820488 | 25.139839404 | 6  | 39.108747303 | 28.356137516 | 24.981139983 |
| 6  | 35.876441151 | 31.809246427 | 26.149113188 | 8  | 40.299517549 | 28.871005458 | 25.072768944 |
| 7  | 35.994629926 | 32.942799489 | 26.862588315 | 8  | 38.169883357 | 28.627560407 | 25.737521796 |
| 1  | 35.284297297 | 33.682207952 | 26.853413980 | 6  | 44.117195119 | 27.396625052 | 28.330335267 |
| 1  | 36.902835105 | 33.191933899 | 27.235795978 | 7  | 43.574172641 | 26.552075329 | 27.385882045 |
| 7  | 36.932797057 | 33.070737686 | 25.924563178 | 1  | 43.870756639 | 25.599452425 | 25.99450056  |
| 1  | 36.779436865 | 30.208667286 | 25.332058129 | 6  | 42.551214581 | 27.195507037 | 26.792855512 |
| 1  | 37.916809994 | 31.325576627 | 26.051005065 | 1  | 41.953439387 | 26.778380054 | 25.987604069 |
| 26 | 41.032119497 | 30.208313626 | 26.276412612 | 7  | 42.399921150 | 28.400812670 | 27.317029369 |
| 6  | 38.813187390 | 35.057623883 | 26.832810035 | 6  | 43.368992661 | 28.547962057 | 28.278552554 |
| 8  | 38.025997988 | 35.072184105 | 27.688003693 | 1  | 43.464488675 | 29.463814477 | 28.856532666 |
| 8  | 39.597141338 | 35.065537819 | 25.976400709 | 6  | 33.797652001 | 31.930035500 | 26.077982833 |
| 6  | 40.464990243 | 31.835646635 | 28.658750791 | 1  | 33.748908183 | 33.016330414 | 25.913566123 |
| 8  | 41.276903393 | 30.956098891 | 28.194114603 | 1  | 33.310060760 | 31.462128758 | 25.211572793 |
| 6  | 40.552398286 | 32.154465217 | 30.157348078 | 7  | 35.161354144 | 31.421212773 | 26.100112867 |
| 6  | 41.746822421 | 33.026172729 | 30.573519706 | 1  | 35.326780419 | 30.611667898 | 25.479218713 |
| 6  | 41.829487909 | 33.341626003 | 32.093963049 | 6  | 36.233795489 | 31.957122305 | 26.696090494 |
| 8  | 41.327374345 | 32.520218001 | 32.901432385 | 7  | 36.155368007 | 33.153111736 | 27.317420363 |
| 8  | 42.430808051 | 34.402100629 | 32.404151480 | 1  | 35.408126789 | 33.830673059 | 27.130329011 |
| 1  | 41.742759838 | 33.987635386 | 30.036571769 | 1  | 36.967485891 | 33.498654161 | 27.814374617 |
| 1  | 42.690174177 | 32.522988868 | 30.293537871 | 7  | 37.389253917 | 31.291122563 | 26.719167120 |
| 1  | 40.611243664 | 31.197829202 | 30.696439818 | 1  | 37.497960021 | 30.347451449 | 26.329064727 |
| 1  | 39.614558858 | 32.650610381 | 30.447802643 | 1  | 38.220487990 | 31.698745825 | 27.162575564 |
| 8  | 39.759151530 | 31.437049598 | 26.011910847 | 26 | 41.065550709 | 29.866127270 | 26.587475154 |
| 8  | 39.597723089 | 32.422495140 | 27.978918086 | 6  | 38.962295780 | 35.099117873 | 26.918021543 |
| 8  | 44.999865686 | 35.292559764 | 23.891003951 | 8  | 38.382818858 | 35.328798346 | 27.898613756 |
| 6  | 44.210267660 | 34.692279096 | 23.183903632 | 8  | 39.538610762 | 34.880049985 | 25.933718500 |
| 7  | 42.867178305 | 34.565322679 | 23.575145370 | 6  | 40.800569726 | 32.084191971 | 28.483269001 |
| 6  | 42.470791472 | 35.326152539 | 24.758798060 | 8  | 41.529299626 | 31.435707282 | 27.609793386 |
| 6  | 41.948771081 | 33.786032888 | 22.917563002 | 6  | 41.473169255 | 32.280503294 | 29.844410460 |
| 7  | 40.733431712 | 33.654364677 | 23.416133644 | 6  | 41.138664949 | 33.573661130 | 30.591485019 |
| 6  | 42.353315573 | 33.134653150 | 21.719971545 | 6  | 41.598032723 | 33.586706165 | 32.071661604 |
| 6  | 43.626583149 | 33.305438201 | 21.280712004 | 8  | 41.281388964 | 32.606237519 | 32.793236186 |
| 7  | 44.519720461 | 34.088790163 | 21.973036520 | 8  | 42.232801307 | 34.602259611 | 32.460731509 |
| 1  | 43.170938127 | 36.156572589 | 24.874744595 | 1  | 40.043314204 | 33.703657670 | 30.586316757 |
| 1  | 42.482601089 | 34.691475492 | 25.659094188 | 1  | 41.575831271 | 34.446950591 | 30.082219472 |
| 1  | 40.465630124 | 34.006220832 | 24.329040066 | 1  | 42.560993407 | 32.160367904 | 29.719682546 |
| 1  | 43.975444034 | 32.786597726 | 20.386214368 | 1  | 41.138540688 | 31.426106800 | 30.462449629 |
| 1  | 41.657380597 | 32.508403367 | 21.166104547 | 8  | 39.881262445 | 29.486163035 | 27.622565253 |
| 1  | 41.465728197 | 35.725143649 | 24.605216175 | 8  | 39.659594879 | 32.492117186 | 28.259071756 |
| 1  | 40.032964666 | 33.078571083 | 22.924776974 | 8  | 44.979344224 | 35.291298820 | 23.862795380 |
| 1  | 45.022874017 | 29.986191248 | 22.903478579 | 6  | 44.192341061 | 34.690798278 | 23.153805628 |
| 1  | 39.453249995 | 27.059695680 | 23.023854661 | 7  | 42.839826863 | 34.594763222 | 23.522081269 |
| 1  | 44.806860011 | 27.293291965 | 28.800807990 | 6  | 42.444726444 | 35.358253415 | 24.704311182 |
| 1  | 32.915526185 | 31.643002436 | 26.882044189 | 6  | 41.917915052 | 33.833570119 | 22.850173766 |
| 1  | 45.459568704 | 34.173343956 | 21.642115940 | 7  | 40.676216173 | 33.772855396 | 23.296751897 |

**IM3**

**QM/MM (BS1) = -3413.001422 a.u.**

**QM/MM (BS2+ZPE) = -3415.021109 a.u.**

|   |              |              |              |   |              |              |              |
|---|--------------|--------------|--------------|---|--------------|--------------|--------------|
| 6 | 44.263701153 | 30.249137449 | 23.755945757 | 1 | 40.373725488 | 34.222099670 | 24.152556379 |
| 7 | 44.719185792 | 31.032952796 | 24.798491661 | 1 | 43.984122895 | 32.711911078 | 20.405462471 |
| 1 | 45.654498706 | 31.454000902 | 24.876537786 | 1 | 41.644966284 | 32.490906545 | 21.146349969 |
| 6 | 43.726867477 | 31.137128909 | 25.705508557 | 1 | 41.452632944 | 35.784610578 | 24.540111000 |

|   |              |              |              |
|---|--------------|--------------|--------------|
| 1 | 39.976086590 | 33.201209900 | 22.800480181 |
| 1 | 44.906061309 | 29.905159114 | 22.945316581 |
| 1 | 39.453309358 | 27.085429903 | 23.059650994 |
| 1 | 45.029109767 | 27.177567801 | 28.885756655 |
| 1 | 33.190914233 | 31.669082699 | 26.945070046 |
| 1 | 45.452516142 | 34.139529339 | 21.632156004 |

**IM4**

**QM/MM (BS1) = -3413.006828 a.u.**

**QM/MM (BS2+ZPE) = -3415.027170 a.u.**

|    |              |              |              |
|----|--------------|--------------|--------------|
| 6  | 44.433352135 | 30.356812060 | 23.684492641 |
| 7  | 44.926587676 | 31.121621079 | 24.720577529 |
| 1  | 45.876241579 | 31.512774148 | 24.793694347 |
| 6  | 43.945153473 | 31.273008197 | 25.633090190 |
| 1  | 44.063505362 | 31.826713674 | 26.561966149 |
| 7  | 42.844812613 | 30.643417532 | 25.234512796 |
| 6  | 43.131755266 | 30.068332162 | 24.014903782 |
| 1  | 42.392837271 | 29.486863533 | 23.468152456 |
| 6  | 38.788849523 | 27.292539099 | 23.894143920 |
| 1  | 38.513319497 | 26.347493584 | 24.389895217 |
| 1  | 37.852005488 | 27.728674817 | 23.513564902 |
| 6  | 39.253552276 | 28.242810319 | 25.006949524 |
| 8  | 40.455785385 | 28.701945117 | 24.997368008 |
| 8  | 38.441330494 | 28.512448268 | 25.908546613 |
| 6  | 43.953634883 | 27.509564479 | 28.172570083 |
| 7  | 43.442077341 | 26.659125860 | 27.212981650 |
| 1  | 43.748121960 | 25.704670616 | 26.992314382 |
| 6  | 42.443262719 | 27.303020698 | 26.580306718 |
| 1  | 41.876384861 | 26.889014210 | 25.753750874 |
| 7  | 42.266797939 | 28.513528229 | 27.091743406 |
| 6  | 43.203413465 | 28.657215489 | 28.090806514 |
| 1  | 43.261664926 | 29.570273435 | 28.676279142 |
| 6  | 33.663549760 | 31.939604289 | 26.037076749 |
| 1  | 33.609503581 | 33.028953191 | 25.895833621 |
| 1  | 33.132121529 | 31.491631416 | 25.185858414 |
| 7  | 35.023593378 | 31.430613099 | 25.986566273 |
| 1  | 35.169624872 | 30.608067153 | 25.380002847 |
| 6  | 36.122254540 | 31.929636749 | 26.566517862 |
| 7  | 36.092045912 | 33.105542776 | 27.225877429 |
| 1  | 35.357199554 | 33.806372139 | 27.079806871 |
| 1  | 36.924274213 | 33.408499826 | 27.718357025 |
| 7  | 37.257567862 | 31.232559851 | 26.534253470 |
| 1  | 37.329417787 | 30.333035608 | 26.057037797 |
| 1  | 38.133924911 | 31.625170163 | 26.895685706 |
| 26 | 41.083984927 | 30.089515651 | 26.267987655 |
| 6  | 38.957587065 | 35.035715130 | 26.992872109 |
| 8  | 38.341077642 | 35.208879246 | 27.963520605 |
| 8  | 39.571509781 | 34.876853686 | 26.020543485 |
| 6  | 40.396514130 | 31.643621859 | 28.746997680 |
| 8  | 41.078755782 | 30.742835517 | 28.085697520 |
| 6  | 40.875540029 | 31.825808214 | 30.195025440 |
| 6  | 41.229606965 | 33.260458601 | 30.604563095 |
| 6  | 41.601654359 | 33.443428048 | 32.101691323 |
| 8  | 41.239870262 | 32.557928341 | 32.918313648 |
| 8  | 42.226606763 | 34.495842061 | 32.393465730 |
| 1  | 40.370329207 | 33.924091756 | 30.400465177 |
| 1  | 42.066052767 | 33.655164074 | 30.005599575 |
| 1  | 41.722024689 | 31.149422861 | 30.380802284 |
| 1  | 40.052380862 | 31.482519725 | 30.844587089 |
| 8  | 40.158375732 | 31.253517074 | 25.644967722 |
| 8  | 39.428040118 | 32.267950956 | 28.313281726 |

|   |              |              |              |
|---|--------------|--------------|--------------|
| 8 | 44.974918313 | 35.298236735 | 23.887851399 |
| 6 | 44.190554750 | 34.695043951 | 23.176978945 |
| 7 | 42.842715367 | 34.576619026 | 23.554928254 |
| 6 | 42.442305231 | 35.341671128 | 24.734415112 |
| 6 | 41.926777754 | 33.799847410 | 22.889666857 |
| 7 | 40.700884252 | 33.688749139 | 23.364128946 |
| 6 | 42.344869057 | 33.129778120 | 21.707068521 |
| 6 | 43.623215645 | 33.292006635 | 21.280487702 |
| 7 | 44.510767714 | 34.080871856 | 21.974747895 |
| 1 | 43.129509930 | 36.184572215 | 24.838954718 |
| 1 | 42.471392363 | 34.715163228 | 25.639902580 |
| 1 | 40.420398519 | 34.055762734 | 24.266043023 |
| 1 | 43.980718984 | 32.764757295 | 20.394265191 |
| 1 | 41.652053676 | 32.500520198 | 21.152671653 |
| 1 | 41.430179308 | 35.725059124 | 24.584534118 |
| 1 | 40.004940815 | 33.109019211 | 22.870506979 |
| 1 | 45.050123496 | 29.962621767 | 22.876857561 |
| 1 | 39.431427265 | 27.043428772 | 23.049688348 |
| 1 | 44.833277122 | 27.284296370 | 28.775522096 |
| 1 | 33.100786721 | 31.661725838 | 26.928226927 |
| 1 | 45.451449093 | 34.167068337 | 21.646630230 |

**2OG Rearrangement Coordinates for AlkB-dsDNA**

**ES1**

**QM/MM (BS1) = -3269.997721 a.u.**

**QM/MM (BS2+ZPE) = -3271.827539 a.u.**

|   |              |              |              |
|---|--------------|--------------|--------------|
| 6 | 31.621630967 | 27.064892502 | 30.383328851 |
| 7 | 31.290609156 | 28.283254955 | 30.937978508 |
| 1 | 30.455212897 | 28.506277606 | 31.492304826 |
| 6 | 32.242764866 | 29.172789475 | 30.605992482 |
| 1 | 32.209514944 | 30.218875533 | 30.900156606 |
| 7 | 33.185627254 | 28.596320020 | 29.867525478 |
| 6 | 32.807341411 | 27.275346458 | 29.719890402 |
| 1 | 33.407468094 | 26.583483338 | 29.136043475 |
| 6 | 36.059488890 | 26.076296070 | 26.055058722 |
| 1 | 35.926350111 | 26.212964154 | 24.970603831 |
| 1 | 37.092688836 | 25.735600200 | 26.199046099 |
| 6 | 35.963643174 | 27.452846404 | 26.725924396 |
| 8 | 34.978828936 | 27.678311917 | 27.515598634 |
| 8 | 36.848151193 | 28.283939488 | 26.461746773 |
| 6 | 31.135259935 | 30.671443003 | 26.365917382 |
| 7 | 31.442302021 | 29.475351658 | 25.755019539 |
| 1 | 30.862070016 | 28.947175257 | 25.091511826 |
| 6 | 32.641230783 | 29.071596397 | 26.212502474 |
| 1 | 33.116329636 | 28.136198910 | 25.929676491 |
| 7 | 33.137275059 | 29.950262960 | 27.077962122 |
| 6 | 32.201396180 | 30.955704750 | 27.185220958 |
| 1 | 32.357511131 | 31.798837225 | 27.852794547 |
| 6 | 42.559020644 | 28.450845263 | 29.156063981 |
| 1 | 42.716478970 | 28.607381386 | 30.228772439 |
| 1 | 42.949226364 | 27.443958047 | 28.942641685 |
| 7 | 41.160705224 | 28.471248951 | 28.794057910 |
| 1 | 40.901073032 | 27.863304229 | 28.005773779 |
| 6 | 40.109645672 | 28.973376363 | 29.465771221 |
| 7 | 40.252895933 | 29.829089249 | 30.493192515 |
| 1 | 41.146156157 | 29.969660391 | 30.971966874 |
| 1 | 39.404996851 | 30.125913770 | 30.978888957 |
| 7 | 38.895976530 | 28.642439469 | 29.026931577 |
| 1 | 38.821152481 | 27.797918173 | 28.448147903 |
| 1 | 38.040510293 | 28.970608142 | 29.486364852 |



|    |              |              |              |
|----|--------------|--------------|--------------|
| 26 | 34.629653768 | 29.375192639 | 28.534618207 |
| 6  | 36.483869284 | 31.011270827 | 30.208305159 |
| 8  | 37.389588219 | 31.327876352 | 30.986370084 |
| 8  | 36.312646937 | 29.894915703 | 29.622080761 |
| 6  | 35.404945481 | 32.073748579 | 29.826822011 |
| 8  | 34.419353686 | 31.685959304 | 29.215607968 |
| 6  | 35.632782968 | 33.497685814 | 30.234483214 |
| 6  | 34.817011433 | 34.552394043 | 29.492816327 |
| 6  | 35.050913836 | 35.984172251 | 30.009846138 |
| 8  | 35.273999989 | 36.137062983 | 31.238518731 |
| 8  | 34.989024170 | 36.921996195 | 29.164935352 |
| 1  | 33.740379751 | 34.334444757 | 29.607161916 |
| 1  | 35.017608124 | 34.525964190 | 28.411113973 |
| 1  | 36.716789741 | 33.692351920 | 30.188557264 |
| 1  | 35.402222171 | 33.541618480 | 31.314738548 |
| 8  | 33.153910968 | 28.118377443 | 35.391288723 |
| 6  | 33.445972946 | 27.159572536 | 34.705137611 |
| 7  | 34.641517355 | 27.157427744 | 33.943602468 |
| 6  | 35.506816541 | 28.334237304 | 34.076400965 |
| 6  | 34.996582504 | 26.149427228 | 33.075441851 |
| 7  | 36.047032121 | 26.282825600 | 32.291085437 |
| 6  | 34.196018995 | 24.975235524 | 33.064442907 |
| 6  | 33.065127525 | 24.949836402 | 33.805682483 |
| 7  | 32.674244850 | 26.010807428 | 34.584553615 |
| 1  | 35.083528009 | 28.979228958 | 34.851128263 |
| 1  | 35.563534055 | 28.881199481 | 33.122422662 |
| 1  | 36.652253823 | 27.110601166 | 32.260053652 |
| 1  | 32.421361224 | 24.079850505 | 33.794397741 |
| 1  | 34.482691202 | 24.121940776 | 32.459041576 |
| 1  | 36.516981963 | 28.018646645 | 34.373711090 |
| 1  | 36.285566899 | 25.578814353 | 31.579813217 |
| 1  | 30.969532273 | 26.192002242 | 30.413282390 |
| 1  | 35.370647445 | 25.291660790 | 26.367968076 |
| 1  | 30.186981755 | 31.192316334 | 26.233528570 |
| 1  | 43.171432294 | 29.151480047 | 28.588498833 |
| 1  | 31.775401880 | 25.960891561 | 35.019941050 |

**TS for 2OG rearrangement**  
**QM/MM (BS1) = -3269.991780 a.u.**  
**QM/MM (BS2+ZPE) = -3271.820336 a.u.**

|   |              |              |              |
|---|--------------|--------------|--------------|
| 6 | 31.586386090 | 27.132211019 | 30.369041013 |
| 7 | 31.251395084 | 28.366857271 | 30.883251838 |
| 1 | 30.416884012 | 28.598178660 | 31.437217284 |
| 6 | 32.196090707 | 29.250820952 | 30.511399731 |
| 1 | 32.168695661 | 30.306614650 | 30.768748243 |
| 7 | 33.133894553 | 28.653826712 | 29.782679934 |
| 6 | 32.764237405 | 27.327169649 | 29.686828942 |
| 1 | 33.361365807 | 26.621806989 | 29.116311260 |
| 6 | 36.096829727 | 26.043363777 | 26.065189222 |
| 1 | 35.922290734 | 26.199775205 | 24.988897563 |
| 1 | 37.124949270 | 25.671786060 | 26.160088451 |
| 6 | 36.073288864 | 27.411826743 | 26.756591117 |
| 8 | 35.100667769 | 27.688190286 | 27.546207045 |
| 8 | 37.006108570 | 28.190291467 | 26.497757348 |
| 6 | 31.177435557 | 30.649315948 | 26.379680282 |
| 7 | 31.488303495 | 29.463462336 | 25.751813387 |
| 1 | 30.909323448 | 28.943899132 | 25.080537341 |
| 6 | 32.689153001 | 29.055811388 | 26.207476539 |
| 1 | 33.166586938 | 28.126990787 | 25.905148601 |
| 7 | 33.181448675 | 29.921115406 | 27.086685016 |

|    |              |              |              |
|----|--------------|--------------|--------------|
| 6  | 32.242771851 | 30.922451415 | 27.205196362 |
| 1  | 32.390102777 | 31.755336892 | 27.888465830 |
| 6  | 42.608503898 | 28.404804582 | 29.043989675 |
| 1  | 42.744752318 | 28.513321813 | 30.125779729 |
| 1  | 43.002177602 | 27.408441188 | 28.796071811 |
| 7  | 41.221330759 | 28.440005194 | 28.649641830 |
| 1  | 40.955123085 | 27.817357251 | 27.876321365 |
| 6  | 40.191244677 | 29.069191191 | 29.235660225 |
| 7  | 40.366897196 | 29.895663901 | 30.281460834 |
| 1  | 41.214058187 | 29.854205150 | 30.855378395 |
| 1  | 39.528423354 | 30.227790090 | 30.759873141 |
| 7  | 38.982714973 | 28.897054441 | 28.704738543 |
| 1  | 38.844193859 | 28.228330024 | 27.94730580  |
| 1  | 38.143450572 | 29.406769466 | 29.001019683 |
| 26 | 34.704917235 | 29.367303125 | 28.558092886 |
| 6  | 36.617992348 | 31.281649275 | 29.699149765 |
| 8  | 37.600770619 | 31.562969558 | 30.389822624 |
| 8  | 36.494111145 | 30.322352921 | 28.868865391 |
| 6  | 35.347146149 | 32.157376666 | 29.795554461 |
| 8  | 34.277613814 | 31.631401013 | 29.517192099 |
| 6  | 35.514373150 | 33.580028218 | 30.240487142 |
| 6  | 34.663537384 | 34.626655275 | 29.519472022 |
| 6  | 34.972976241 | 36.054750012 | 30.008414698 |
| 8  | 35.258342893 | 36.206825256 | 31.224409733 |
| 8  | 34.921899772 | 36.983700601 | 29.153154586 |
| 1  | 33.591830627 | 34.430292737 | 29.698709474 |
| 1  | 34.811836757 | 34.585973154 | 28.429557568 |
| 1  | 36.584354196 | 33.827043300 | 30.187429551 |
| 1  | 35.264356612 | 33.600517484 | 31.315999821 |
| 8  | 32.945365776 | 28.112147344 | 35.361265794 |
| 6  | 33.198053601 | 27.103254630 | 34.736938438 |
| 7  | 34.289887889 | 27.071719408 | 33.832257315 |
| 6  | 35.111146706 | 28.283599682 | 33.742257822 |
| 6  | 34.531024897 | 26.022315535 | 32.980426303 |
| 7  | 35.378180003 | 26.126032138 | 31.977103953 |
| 6  | 33.843701736 | 24.803663633 | 33.217329242 |
| 6  | 32.842286578 | 24.796106326 | 34.119949739 |
| 7  | 32.480396635 | 25.916296588 | 34.823066062 |
| 1  | 34.859290663 | 28.924905182 | 34.591769714 |
| 1  | 34.915150307 | 28.817632630 | 32.799488611 |
| 1  | 35.860921329 | 26.990820679 | 31.714620523 |
| 1  | 32.286260288 | 23.887978883 | 34.297685332 |
| 1  | 34.103128448 | 23.904346843 | 32.669842741 |
| 1  | 36.174300689 | 28.007480100 | 33.785070071 |
| 1  | 35.346252607 | 25.383069048 | 31.264650286 |
| 1  | 30.940940985 | 26.255645792 | 30.424730737 |
| 1  | 35.398602636 | 25.273875233 | 26.394481846 |
| 1  | 30.235182040 | 31.180079713 | 26.243608751 |
| 1  | 43.227952716 | 29.131498790 | 28.518379546 |
| 1  | 31.576144764 | 25.900170520 | 35.249728682 |

**ES2**  
**QM/MM (BS1) = -3269.999004 a.u.**  
**QM/MM (BS2+ZPE) = -3271.830009 a.u.**

|   |              |              |              |
|---|--------------|--------------|--------------|
| 6 | 31.653611334 | 27.117420980 | 30.345688939 |
| 7 | 31.321170396 | 28.344856558 | 30.879582989 |
| 1 | 30.477979193 | 28.572994252 | 31.421989245 |
| 6 | 32.280738482 | 29.226887530 | 30.538111720 |
| 1 | 32.255249728 | 30.278807682 | 30.811252982 |
| 7 | 33.226431837 | 28.635415297 | 29.814895133 |
| 6 | 32.843367073 | 27.315236464 | 29.685026125 |

|    |              |              |              |
|----|--------------|--------------|--------------|
| 1  | 33.437859966 | 26.615379766 | 29.104469395 |
| 6  | 36.127778267 | 26.029331410 | 26.043909983 |
| 1  | 35.965839614 | 26.183108254 | 24.965439500 |
| 1  | 37.152687328 | 25.654388087 | 26.153381246 |
| 6  | 36.099483000 | 27.398879278 | 26.729883769 |
| 8  | 35.117766963 | 27.684699256 | 27.503019392 |
| 8  | 37.038417169 | 28.173724446 | 26.481082957 |
| 6  | 31.214984070 | 30.649302613 | 26.377394946 |
| 7  | 31.525414251 | 29.466529220 | 25.743935980 |
| 1  | 30.943290532 | 28.947391622 | 25.075111919 |
| 6  | 32.724271732 | 29.054886709 | 26.201045712 |
| 1  | 33.200513180 | 28.125639194 | 25.899367700 |
| 7  | 33.216352825 | 29.915503058 | 27.085022971 |
| 6  | 32.278891892 | 30.917310649 | 27.206349614 |
| 1  | 32.425565352 | 31.746169171 | 27.894545203 |
| 6  | 42.607166408 | 28.407886855 | 29.074248368 |
| 1  | 42.742556936 | 28.547399912 | 30.152730186 |
| 1  | 43.023652282 | 27.414353506 | 28.854494466 |
| 7  | 41.219618823 | 28.387276602 | 28.681193293 |
| 1  | 40.964687536 | 27.722490603 | 27.940135987 |
| 6  | 40.187457663 | 29.098144425 | 29.159219809 |
| 7  | 40.339166239 | 30.000642364 | 30.144851827 |
| 1  | 41.141064890 | 29.967967553 | 30.779819726 |
| 1  | 39.494174177 | 30.474358700 | 30.467937340 |
| 7  | 39.001219497 | 28.922713478 | 28.582030329 |
| 1  | 38.884848001 | 28.221387478 | 27.853423506 |
| 1  | 38.159678687 | 29.464167777 | 28.809828916 |
| 26 | 34.761631383 | 29.361127187 | 28.533666889 |
| 6  | 36.688914075 | 31.353910984 | 29.556494406 |
| 8  | 37.711800891 | 31.675494120 | 30.175167889 |
| 8  | 36.548877349 | 30.395996688 | 28.735059733 |
| 6  | 35.390648477 | 32.172311175 | 29.760025654 |
| 8  | 34.329296714 | 31.615431867 | 29.514104361 |
| 6  | 35.524289085 | 33.582609983 | 30.252439113 |
| 6  | 34.681757131 | 34.632078283 | 29.523709203 |
| 6  | 34.986358059 | 36.056458551 | 30.024853647 |
| 8  | 35.273107547 | 36.198930265 | 31.240927678 |
| 8  | 34.931892168 | 36.990540916 | 29.174541189 |
| 1  | 33.607696218 | 34.433819201 | 29.685777700 |
| 1  | 34.846442695 | 34.597927369 | 28.436039285 |
| 1  | 36.590072295 | 33.848480042 | 30.231241267 |
| 1  | 35.236235207 | 33.577918446 | 31.318277649 |
| 8  | 32.878833448 | 28.107698307 | 35.307865491 |
| 6  | 33.133225927 | 27.091310174 | 34.696287063 |
| 7  | 34.203844436 | 27.060141734 | 33.767815999 |
| 6  | 35.005660625 | 28.280756413 | 33.633963090 |
| 6  | 34.451061780 | 25.994918907 | 32.939254493 |
| 7  | 35.277518351 | 26.094946938 | 31.916580374 |
| 6  | 33.800350583 | 24.767866687 | 33.222468172 |
| 6  | 32.811345875 | 24.764384679 | 34.140127828 |
| 7  | 32.437446847 | 25.893803692 | 34.821063391 |
| 1  | 34.786496353 | 28.923203555 | 34.491697195 |
| 1  | 34.760699158 | 28.808833428 | 32.698941526 |
| 1  | 35.649693674 | 26.986008950 | 31.577092727 |
| 1  | 32.273628546 | 23.850992055 | 34.343924179 |
| 1  | 34.064494402 | 23.863522755 | 32.685155702 |
| 1  | 36.071662882 | 28.013997849 | 33.629409885 |
| 1  | 35.233525078 | 25.339821667 | 31.216573496 |
| 1  | 31.003672180 | 26.243050162 | 30.379186462 |
| 1  | 35.424259800 | 25.262499123 | 26.368097174 |
| 1  | 30.273735280 | 31.181886002 | 26.241479627 |
| 1  | 43.212770197 | 29.131972144 | 28.529260420 |

|   |              |              |              |
|---|--------------|--------------|--------------|
| 1 | 31.536542144 | 25.877689298 | 35.254749383 |
|---|--------------|--------------|--------------|

**Substrate hydroxylation step reaction states cartesian coordinates for AlkB-dsDNA**

**Snapshot 1**

**RC2**

**QM/MM (BS1) = -3375.982529 a.u.**

**QM/MM (BS2+ZPE) = -3377.931323 a.u.**

|    |              |               |              |
|----|--------------|---------------|--------------|
| 6  | 27.513498642 | 22.629163518  | 37.006586909 |
| 7  | 27.067532430 | 23.585801841  | 37.891787747 |
| 1  | 26.274960111 | 23.489520226  | 38.536976848 |
| 6  | 27.893289656 | 24.641015571  | 37.845554246 |
| 1  | 27.754109097 | 25.543113378  | 38.434624120 |
| 7  | 28.866604148 | 24.4122289781 | 36.972199008 |
| 6  | 28.660234260 | 23.153007899  | 36.454852215 |
| 1  | 29.361204744 | 22.709916326  | 35.757497679 |
| 6  | 31.459532509 | 24.418974189  | 32.197653092 |
| 1  | 30.988141812 | 25.296891850  | 31.737316088 |
| 1  | 32.508067451 | 24.349266120  | 31.873235720 |
| 6  | 31.498535661 | 24.510642474  | 33.712235284 |
| 8  | 30.704245896 | 25.443262415  | 34.214181802 |
| 8  | 32.270499707 | 23.830301452  | 34.363428218 |
| 6  | 26.399296206 | 27.450541292  | 34.872800151 |
| 7  | 26.664435656 | 26.626605526  | 33.799122336 |
| 1  | 26.045748970 | 26.424118640  | 33.006263060 |
| 6  | 27.890105300 | 26.094460979  | 33.983858336 |
| 1  | 28.372308633 | 25.413398593  | 33.288954552 |
| 7  | 28.425092661 | 26.534698254  | 35.114663084 |
| 6  | 27.507270315 | 27.383523147  | 35.682001977 |
| 1  | 27.715320203 | 27.885073089  | 36.624344613 |
| 6  | 35.714964168 | 27.862752652  | 35.916142526 |
| 1  | 34.657037023 | 28.166793817  | 35.999336111 |
| 1  | 36.012711198 | 27.502203253  | 36.913939344 |
| 7  | 35.880640315 | 26.854135053  | 34.875885662 |
| 1  | 36.406904782 | 27.079165831  | 34.022698935 |
| 6  | 35.109657289 | 25.751696264  | 34.795354563 |
| 7  | 34.206266819 | 25.456190633  | 35.727279171 |
| 1  | 33.885209240 | 26.140022823  | 36.411493659 |
| 1  | 33.573424784 | 24.66378792   | 35.563031062 |
| 7  | 35.211816608 | 24.987286096  | 33.688303645 |
| 1  | 36.094298418 | 25.030201376  | 33.163205999 |
| 1  | 34.773835105 | 24.058668164  | 33.661741683 |
| 26 | 30.183773317 | 25.714738827  | 36.050047632 |
| 8  | 31.436353741 | 25.027006490  | 36.794326437 |
| 8  | 32.578597597 | 27.629576852  | 37.280597100 |
| 6  | 31.426872213 | 28.065347040  | 37.330509829 |
| 8  | 30.380026891 | 27.487034615  | 36.828978074 |
| 6  | 31.125008306 | 29.442254140  | 37.914703795 |
| 6  | 31.961812308 | 29.889972118  | 39.118212369 |
| 6  | 31.711888317 | 31.382772459  | 39.357705614 |
| 8  | 30.884369392 | 31.707227578  | 40.249859540 |
| 8  | 32.311007675 | 32.191381580  | 38.591952887 |
| 1  | 33.026447690 | 29.707227688  | 38.917674507 |
| 1  | 31.672424871 | 29.315045930  | 40.012228978 |
| 1  | 30.050284424 | 29.488113894  | 38.145564233 |
| 1  | 31.310163552 | 30.146215422  | 37.083234391 |
| 8  | 29.117790850 | 21.875809588  | 41.428275000 |
| 6  | 29.567584707 | 21.217007123  | 40.506056170 |
| 7  | 30.758324641 | 21.605413429  | 39.862559607 |

|   |              |              |              |
|---|--------------|--------------|--------------|
| 6 | 31.469557544 | 22.757280071 | 40.417076921 |
| 6 | 31.245512813 | 21.011718577 | 38.716864420 |
| 7 | 32.328833386 | 21.478355235 | 38.139916097 |
| 6 | 30.532872686 | 19.890540278 | 38.195135647 |
| 6 | 29.451972490 | 19.429673726 | 38.867818850 |
| 7 | 28.983983499 | 20.062814392 | 39.999976635 |
| 1 | 31.395331248 | 23.619205049 | 39.732831682 |
| 1 | 32.527006599 | 22.498066094 | 40.568200254 |
| 1 | 32.782500513 | 22.311469549 | 38.494550040 |
| 1 | 28.917501103 | 18.549974495 | 38.513560633 |
| 1 | 30.890409182 | 19.388533090 | 37.299046680 |
| 1 | 31.018701412 | 23.005588177 | 41.381253765 |
| 1 | 32.623907044 | 21.152844800 | 37.155177732 |
| 8 | 34.786376219 | 28.164111248 | 38.930001050 |
| 1 | 34.554419585 | 27.952840364 | 39.857753100 |
| 1 | 33.985446445 | 27.925572082 | 38.426915917 |
| 8 | 32.742523633 | 21.039239292 | 35.655893001 |
| 1 | 33.385513842 | 20.652654457 | 35.021367944 |
| 1 | 31.838857672 | 20.799279683 | 35.293645774 |
| 1 | 26.900753372 | 21.777642737 | 36.710744187 |
| 1 | 30.928542928 | 23.543028264 | 31.825045897 |
| 1 | 25.443338849 | 27.950291492 | 35.029205361 |
| 1 | 36.277928549 | 28.767427949 | 35.686575481 |
| 1 | 28.144514491 | 19.731491156 | 40.430661197 |

**TS7**

**QM/MM (BS1) = -3375.952287 a.u.**

**QM/MM (BS2+ZPE) = -3377.893800 a.u.**

|   |              |              |              |
|---|--------------|--------------|--------------|
| 6 | 27.399831014 | 22.422807490 | 36.932698112 |
| 7 | 26.992417768 | 23.324799826 | 37.889399814 |
| 1 | 26.204323452 | 23.214975798 | 38.535258932 |
| 6 | 27.857786271 | 24.346160045 | 37.923822164 |
| 1 | 27.758844593 | 25.199474325 | 38.588952182 |
| 7 | 28.818475398 | 24.151869883 | 37.031633402 |
| 6 | 28.563036237 | 22.946033421 | 36.416855680 |
| 1 | 29.247148197 | 22.530268254 | 35.685191910 |
| 6 | 31.426533968 | 24.247394774 | 32.421369627 |
| 1 | 31.007101397 | 25.175894351 | 32.012221854 |
| 1 | 32.472730661 | 24.147782020 | 32.092342184 |
| 6 | 31.474578521 | 24.266708421 | 33.942112416 |
| 8 | 30.898750000 | 25.326525882 | 34.483418381 |
| 8 | 32.085926132 | 23.423529119 | 34.580248933 |
| 6 | 26.445927416 | 27.376078809 | 34.944827594 |
| 7 | 26.740438918 | 26.559404937 | 33.874237544 |
| 1 | 26.138906454 | 26.358435335 | 33.070646362 |
| 6 | 27.953750496 | 26.008536643 | 34.105465215 |
| 1 | 28.443656924 | 25.323373886 | 33.419404041 |
| 7 | 28.454056644 | 26.425763948 | 35.257904153 |
| 6 | 27.524025729 | 27.280197913 | 35.794774517 |
| 1 | 27.695363252 | 27.764352714 | 36.754421831 |
| 6 | 35.721150187 | 27.751503301 | 35.896838118 |
| 1 | 34.663595524 | 28.047352812 | 36.002560229 |
| 1 | 36.043462810 | 27.393861662 | 36.888063963 |
| 7 | 35.865084351 | 26.738717235 | 34.854533265 |
| 1 | 36.395360150 | 26.960121096 | 34.001310681 |
| 6 | 35.099114428 | 25.635328975 | 34.785752261 |
| 7 | 34.204709143 | 25.340684363 | 35.729182272 |
| 1 | 33.895473956 | 26.011681957 | 36.433239266 |
| 1 | 33.604546963 | 24.521728023 | 35.605507802 |
| 7 | 35.181669058 | 24.862731959 | 33.676379224 |
| 1 | 36.062156409 | 24.920601402 | 33.147592804 |

|    |              |              |              |
|----|--------------|--------------|--------------|
| 1  | 34.809001018 | 23.902077387 | 33.704325767 |
| 26 | 30.300965170 | 25.467282554 | 36.335188802 |
| 8  | 31.508946149 | 24.612446662 | 37.264647550 |
| 8  | 32.661998413 | 27.519123150 | 37.297521273 |
| 6  | 31.502047223 | 27.916170439 | 37.449424037 |
| 8  | 30.443782526 | 27.260114583 | 37.103778793 |
| 6  | 31.207328870 | 29.316553418 | 37.980920003 |
| 6  | 32.083526843 | 29.830254000 | 39.129988642 |
| 6  | 31.786677986 | 31.319381406 | 39.342622602 |
| 8  | 30.936715631 | 31.627691793 | 40.219150268 |
| 8  | 32.369738163 | 32.138295556 | 38.575637326 |
| 1  | 33.143380410 | 29.674547209 | 38.887963871 |
| 1  | 31.853352208 | 29.273215537 | 40.052167149 |
| 1  | 30.143305169 | 29.359333837 | 38.256755703 |
| 1  | 31.352083650 | 29.985193892 | 37.112152780 |
| 8  | 29.561006520 | 22.207467857 | 40.485555897 |
| 6  | 29.885819929 | 21.383502447 | 39.657829417 |
| 7  | 30.981686612 | 21.642381465 | 38.774730095 |
| 6  | 31.764810789 | 22.807120339 | 39.042046014 |
| 6  | 31.297403522 | 20.835482958 | 37.684619649 |
| 7  | 32.221893781 | 21.217700678 | 36.834533171 |
| 6  | 30.590729926 | 19.605251155 | 37.561596331 |
| 6  | 29.630660127 | 19.289248923 | 38.466296632 |
| 7  | 29.278412645 | 20.142540331 | 39.491890661 |
| 1  | 31.590256831 | 23.725032196 | 38.168725718 |
| 1  | 32.841890531 | 22.603112778 | 38.961116969 |
| 1  | 32.532827585 | 22.184717273 | 36.806014026 |
| 1  | 29.097372689 | 18.346228231 | 38.384366537 |
| 1  | 30.811688113 | 18.933876930 | 36.734977647 |
| 1  | 31.467210786 | 23.261616454 | 39.990677350 |
| 1  | 32.505652598 | 20.638511734 | 35.978170756 |
| 8  | 34.877187147 | 28.102502104 | 38.918323087 |
| 1  | 34.640147680 | 27.893463586 | 39.844787395 |
| 1  | 34.083414272 | 27.845828548 | 38.413113599 |
| 8  | 32.855582897 | 20.104090905 | 34.488730262 |
| 1  | 32.904338875 | 19.108891595 | 34.409875581 |
| 1  | 31.878336613 | 20.213125332 | 34.291837781 |
| 1  | 26.755324531 | 21.614295335 | 36.587753451 |
| 1  | 30.861025282 | 23.424017385 | 31.985116353 |
| 1  | 25.493290716 | 27.893748400 | 35.056938408 |
| 1  | 36.272299844 | 28.660275081 | 35.655104310 |
| 1  | 28.489542265 | 19.917606255 | 40.063782849 |

**Snapshot 2**

**RC2**

**QM/MM (BS1) = -3528.063820 a.u.**

**QM/MM (BS2+ZPE) = -3530.159254 a.u.**

|   |              |              |              |
|---|--------------|--------------|--------------|
| 6 | 27.871007140 | 21.612468272 | 41.928123500 |
| 7 | 27.900134029 | 22.615105189 | 42.873033905 |
| 1 | 27.596506486 | 22.535973156 | 43.851587029 |
| 6 | 28.398035458 | 23.724078830 | 42.295826418 |
| 1 | 28.515861472 | 24.672075656 | 42.814111961 |
| 7 | 28.691520198 | 23.488139989 | 41.023065163 |
| 6 | 28.373652579 | 22.168375676 | 40.776960843 |
| 1 | 28.499560564 | 21.723543047 | 39.794174269 |
| 6 | 28.916651647 | 22.926306439 | 35.728216460 |
| 1 | 28.225006627 | 23.391707077 | 35.009958825 |
| 1 | 29.914530065 | 22.975595696 | 35.262996388 |
| 6 | 28.974914062 | 23.787229398 | 36.974894790 |
| 8 | 28.728027083 | 23.281822326 | 38.124685873 |
| 8 | 29.289691720 | 24.999181440 | 36.903898032 |

|    |              |              |              |
|----|--------------|--------------|--------------|
| 6  | 24.970855058 | 25.764235325 | 40.069949642 |
| 7  | 24.806850450 | 24.746505516 | 39.152053926 |
| 1  | 23.924953842 | 24.334653599 | 38.823136721 |
| 6  | 26.030607965 | 24.344843389 | 38.759650411 |
| 1  | 26.207850752 | 23.538743516 | 38.055748608 |
| 7  | 26.972172880 | 25.063914899 | 39.357901256 |
| 6  | 26.323685011 | 25.954938725 | 40.182848259 |
| 1  | 26.871837831 | 26.680600809 | 40.774597431 |
| 6  | 34.557709834 | 27.283698061 | 36.418512645 |
| 1  | 33.681079831 | 27.846317576 | 36.782073946 |
| 1  | 35.207613798 | 27.114480369 | 37.293372900 |
| 7  | 34.148424401 | 26.039611471 | 35.793446981 |
| 1  | 34.508716853 | 25.815229628 | 34.865918878 |
| 6  | 33.301187643 | 25.161812092 | 36.362785983 |
| 7  | 32.923921662 | 25.322416398 | 37.631987267 |
| 1  | 33.367365423 | 25.979888580 | 38.294059413 |
| 1  | 32.147841405 | 24.776801231 | 38.008751393 |
| 7  | 32.798643446 | 24.155928746 | 35.637261776 |
| 1  | 33.106741580 | 24.062658208 | 34.659819633 |
| 1  | 32.566558830 | 23.261280771 | 36.111594031 |
| 26 | 29.084190095 | 24.788734898 | 39.378270506 |
| 8  | 30.689559164 | 24.557981581 | 39.409698941 |
| 8  | 28.663610421 | 28.704027408 | 39.059470778 |
| 6  | 29.440695041 | 27.768828834 | 39.286950494 |
| 8  | 29.045996452 | 26.664593525 | 39.841832570 |
| 6  | 30.906729056 | 27.903070254 | 38.934734398 |
| 6  | 31.312726457 | 29.314610465 | 38.531545171 |
| 6  | 31.162698373 | 30.402003961 | 39.613826620 |
| 8  | 31.153877798 | 30.059099612 | 40.825990136 |
| 8  | 31.097238946 | 31.592627418 | 39.194169450 |
| 1  | 30.743526178 | 29.648852574 | 37.651250515 |
| 1  | 32.374542050 | 29.309941714 | 38.226093241 |
| 1  | 31.108328163 | 27.191961544 | 38.116819409 |
| 1  | 31.496147923 | 27.529913630 | 39.783151565 |
| 8  | 31.652253380 | 21.730879296 | 44.099143121 |
| 6  | 31.545515286 | 20.861791074 | 43.257241221 |
| 7  | 32.007218065 | 21.068674374 | 41.931542059 |
| 6  | 32.649310986 | 22.356236383 | 41.652452523 |
| 6  | 31.854868004 | 20.157172659 | 40.913927356 |
| 7  | 32.291795773 | 20.444164521 | 39.697817442 |
| 6  | 31.227479167 | 18.919519653 | 41.208135947 |
| 6  | 30.829595990 | 18.681882762 | 42.482991659 |
| 7  | 30.980974397 | 19.610947579 | 43.483188693 |
| 1  | 32.764273474 | 22.881634444 | 42.604884468 |
| 1  | 32.030586813 | 22.963449242 | 40.970463796 |
| 1  | 32.677502714 | 21.339949836 | 39.423313396 |
| 1  | 30.369820337 | 17.736584130 | 42.743996700 |
| 1  | 31.083068395 | 18.162876188 | 40.437831385 |
| 1  | 33.640959813 | 22.184003556 | 41.207841873 |
| 1  | 32.149111939 | 19.780579198 | 38.926020563 |
| 8  | 32.780654621 | 21.581776917 | 36.674533577 |
| 1  | 33.318427571 | 21.405634047 | 35.862041126 |
| 1  | 32.217445512 | 20.769352010 | 36.786609138 |
| 8  | 28.300252827 | 29.894343609 | 41.847029468 |
| 1  | 29.119404407 | 29.613180592 | 41.401182273 |
| 1  | 27.608878041 | 29.664799150 | 41.202834327 |
| 8  | 26.093335980 | 29.127539243 | 39.662668695 |
| 1  | 26.125553048 | 30.073198344 | 39.433111901 |
| 1  | 26.977820535 | 28.807029595 | 39.354588422 |
| 8  | 34.136887792 | 26.830958963 | 39.643562195 |
| 1  | 34.539609591 | 26.066163554 | 40.132080872 |
| 1  | 33.801310500 | 27.438968482 | 40.345098332 |

|   |              |              |              |
|---|--------------|--------------|--------------|
| 1 | 27.357377092 | 20.661201283 | 42.067201229 |
| 1 | 28.626680268 | 21.884103516 | 35.861621806 |
| 1 | 24.166690127 | 26.224234751 | 40.644220148 |
| 1 | 35.093028413 | 27.917982638 | 35.711982805 |
| 1 | 30.619090752 | 19.391316509 | 44.389154982 |

**TS7**

**QM/MM (BS1) = -3528.029559 a.u.**

**QM/MM (BS2+ZPE) = -3530.125014 a.u.**

|    |              |              |              |
|----|--------------|--------------|--------------|
| 6  | 27.799647387 | 21.462995257 | 41.977020298 |
| 7  | 27.848875481 | 22.460587687 | 42.926188178 |
| 1  | 27.542133714 | 22.389649958 | 43.903336521 |
| 6  | 28.386493420 | 23.555674240 | 42.360724737 |
| 1  | 28.538286003 | 24.493019215 | 42.889732543 |
| 7  | 28.683333778 | 23.318187815 | 41.090005582 |
| 6  | 28.326834030 | 22.010806911 | 40.834434445 |
| 1  | 28.440198015 | 21.569602327 | 39.848644801 |
| 6  | 28.931794176 | 22.842701186 | 35.752125799 |
| 1  | 28.227380024 | 23.365845650 | 35.086972228 |
| 1  | 29.914930605 | 22.891562497 | 35.257981106 |
| 6  | 29.048316487 | 23.597087567 | 37.060353693 |
| 8  | 28.723682565 | 23.050722027 | 38.159632426 |
| 8  | 29.493613305 | 24.783666676 | 37.101174310 |
| 6  | 25.065399993 | 25.730832514 | 40.090944728 |
| 7  | 24.877494126 | 24.728069288 | 39.161869201 |
| 1  | 23.987462481 | 24.327641361 | 38.843066039 |
| 6  | 26.095395003 | 24.306458946 | 38.763670952 |
| 1  | 26.248726074 | 23.500108787 | 38.053746678 |
| 7  | 27.056433657 | 24.993937521 | 39.365151900 |
| 6  | 26.426705476 | 25.887644005 | 40.200104353 |
| 1  | 26.992272948 | 26.590743205 | 40.805317854 |
| 6  | 34.521594175 | 27.254171727 | 36.437195750 |
| 1  | 33.661431056 | 27.837681515 | 36.809768861 |
| 1  | 35.173089899 | 27.066013332 | 37.306857749 |
| 7  | 34.084592560 | 26.020695464 | 35.809729161 |
| 1  | 34.370983440 | 25.832534143 | 34.849352630 |
| 6  | 33.283188849 | 25.113614829 | 36.403780429 |
| 7  | 32.964581721 | 25.232473040 | 37.692779737 |
| 1  | 33.395966400 | 25.920611880 | 38.329371961 |
| 1  | 32.267910940 | 24.616083406 | 38.123714462 |
| 7  | 32.770472404 | 24.119139349 | 35.668857865 |
| 1  | 33.089984653 | 24.024231092 | 34.695351552 |
| 1  | 32.503695028 | 23.228527900 | 36.127618836 |
| 26 | 29.288597058 | 24.539982257 | 39.429061600 |
| 8  | 30.976635731 | 23.940287588 | 39.593544764 |
| 8  | 28.661514731 | 28.385707015 | 39.209995347 |
| 6  | 29.579979858 | 27.570911405 | 39.352194582 |
| 8  | 29.437106854 | 26.410236178 | 39.909176439 |
| 6  | 30.977548160 | 27.903400244 | 38.863737184 |
| 6  | 31.183240775 | 29.354526749 | 38.459331956 |
| 6  | 31.120506510 | 30.408347251 | 39.583617626 |
| 8  | 31.153777397 | 30.036572552 | 40.783859938 |
| 8  | 31.066809963 | 31.611465906 | 39.193178952 |
| 1  | 30.442529667 | 29.649290134 | 37.700509249 |
| 1  | 32.169445659 | 29.466482319 | 37.973904303 |
| 1  | 31.169228256 | 27.233319704 | 38.008127371 |
| 1  | 31.690417083 | 27.581632118 | 39.633288081 |
| 8  | 31.282132027 | 21.980933681 | 43.794571827 |
| 6  | 31.267643107 | 21.049374285 | 43.018289451 |
| 7  | 31.696157926 | 21.228436108 | 41.663726591 |
| 6  | 32.219175340 | 22.519415856 | 41.302580756 |

|   |              |              |              |
|---|--------------|--------------|--------------|
| 6 | 31.641754371 | 20.224204054 | 40.713137420 |
| 7 | 32.030383789 | 20.484566654 | 39.477925324 |
| 6 | 31.182559829 | 18.944256927 | 41.112704905 |
| 6 | 30.827542444 | 18.745749016 | 42.408754695 |
| 7 | 30.873428102 | 19.754319492 | 43.342893433 |
| 1 | 32.275029358 | 23.157969364 | 42.187641987 |
| 1 | 31.498457215 | 23.162124813 | 40.488645318 |
| 1 | 32.208199346 | 21.418283299 | 39.118354294 |
| 1 | 30.479242334 | 17.771290564 | 42.737698533 |
| 1 | 31.106218926 | 18.128033221 | 40.395172629 |
| 1 | 33.178242591 | 22.430427176 | 40.772841187 |
| 1 | 31.964034773 | 19.759254948 | 38.752864131 |
| 8 | 32.630282534 | 21.518492049 | 36.606642237 |
| 1 | 33.233853511 | 21.368780688 | 35.835585756 |
| 1 | 32.081492278 | 20.689650805 | 36.659274503 |
| 8 | 28.245047045 | 29.891569440 | 41.820154958 |
| 1 | 29.022278035 | 29.536356058 | 41.355214747 |
| 1 | 27.511572421 | 29.649772839 | 41.227958440 |
| 8 | 26.118179793 | 30.085176212 | 39.682545503 |
| 1 | 26.237027553 | 30.005439679 | 39.389692363 |
| 1 | 26.972252183 | 28.658521567 | 39.432477460 |
| 8 | 34.154162207 | 26.799781903 | 39.679118578 |
| 1 | 34.519628753 | 26.025468278 | 40.182656004 |
| 1 | 33.829892723 | 27.427252413 | 40.368366393 |
| 1 | 27.249437633 | 20.529603511 | 42.095832751 |
| 1 | 28.614141186 | 21.804024239 | 35.843307500 |
| 1 | 24.258132590 | 26.201847611 | 40.651775757 |
| 1 | 35.067763613 | 27.879819121 | 35.731269691 |
| 1 | 30.548017230 | 19.556315251 | 44.267487713 |

**Snapshot 3  
RC2**

**QM/MM (BS1) = -3453.536340 a.u.**

**QM/MM (BS2+ZPE) = -3455.550390 a.u.**

|   |              |              |              |
|---|--------------|--------------|--------------|
| 6 | 29.743526712 | 21.863207163 | 45.728228760 |
| 7 | 30.202554378 | 22.989525843 | 46.378482468 |
| 1 | 30.619257765 | 23.020710480 | 47.318835382 |
| 6 | 30.027438350 | 24.050857450 | 45.572083519 |
| 1 | 30.265929106 | 25.080985220 | 45.837575317 |
| 7 | 29.486359074 | 23.653045325 | 44.424099704 |
| 6 | 29.302573555 | 22.290506314 | 44.500758384 |
| 1 | 28.860408546 | 21.714677529 | 43.690637415 |
| 6 | 25.935071453 | 22.473129124 | 40.389531642 |
| 1 | 25.144928205 | 23.167540381 | 40.698542278 |
| 1 | 26.019133603 | 22.511340150 | 39.297841057 |
| 6 | 27.291575981 | 22.836629591 | 40.988835492 |
| 8 | 27.214863028 | 23.715028348 | 41.984959629 |
| 8 | 28.327453760 | 22.374405382 | 40.560416993 |
| 6 | 26.103374626 | 25.814580344 | 46.107095593 |
| 7 | 25.371799668 | 24.789316485 | 45.543616318 |
| 1 | 24.511276032 | 24.357383334 | 45.904150863 |
| 6 | 26.012678837 | 24.385616655 | 44.433568458 |
| 1 | 25.668573737 | 23.597489546 | 43.770199965 |
| 7 | 27.113310855 | 25.104186679 | 44.251837693 |
| 6 | 27.194621400 | 25.999942493 | 45.293318289 |
| 1 | 28.053280751 | 26.665789106 | 45.392294284 |
| 6 | 31.306993933 | 26.555017327 | 37.088426620 |
| 1 | 31.278556816 | 26.818351225 | 38.160682250 |

|    |              |              |               |
|----|--------------|--------------|---------------|
| 1  | 32.333220218 | 26.228448680 | 36.856345492  |
| 7  | 30.342412237 | 25.527220741 | 36.756007728  |
| 1  | 29.434497735 | 25.837899243 | 36.389993674  |
| 6  | 30.420575325 | 24.233021108 | 37.107659059  |
| 7  | 31.474584103 | 23.760469164 | 37.777763978  |
| 1  | 32.110618733 | 24.372188861 | 38.306642612  |
| 1  | 31.463466301 | 22.777174336 | 38.031640769  |
| 7  | 29.394139069 | 23.435072898 | 36.786660146  |
| 1  | 28.699491962 | 23.804212278 | 36.122217339  |
| 1  | 29.514308411 | 22.416309854 | 36.659221728  |
| 26 | 28.604369335 | 24.667177549 | 42.862470226  |
| 8  | 29.839802972 | 24.304128005 | 41.856606502  |
| 8  | 30.904368524 | 27.202632991 | 42.6711106233 |
| 6  | 29.820887277 | 27.148651487 | 42.080488177  |
| 8  | 28.758047721 | 26.594263551 | 42.584172841  |
| 6  | 29.636365250 | 27.809698590 | 40.714876969  |
| 6  | 29.214584471 | 29.280245387 | 40.826475635  |
| 6  | 30.268012170 | 30.183838490 | 41.488452815  |
| 8  | 29.839513332 | 31.021518588 | 42.336412582  |
| 8  | 31.464050703 | 30.044120409 | 41.141112209  |
| 1  | 28.275141710 | 29.392458566 | 41.382918160  |
| 1  | 29.034837083 | 29.671703135 | 39.807796498  |
| 1  | 28.898832593 | 27.231026430 | 40.148003286  |
| 1  | 30.583090765 | 27.769305908 | 40.163114287  |
| 8  | 34.282201468 | 22.268058477 | 45.174578926  |
| 6  | 33.593980473 | 21.446253174 | 44.601921998  |
| 7  | 32.885124682 | 21.782541257 | 43.423458446  |
| 6  | 33.034004833 | 23.160520983 | 42.935534369  |
| 6  | 32.079584557 | 20.902476930 | 42.735747128  |
| 7  | 31.361051236 | 21.337833698 | 41.715476766  |
| 6  | 32.045567683 | 19.546372957 | 43.169909147  |
| 6  | 32.683240493 | 19.210209220 | 44.320765749  |
| 7  | 33.427687719 | 20.127841825 | 45.029473725  |
| 1  | 33.305860347 | 23.157765821 | 41.869208514  |
| 1  | 33.828283956 | 23.633820628 | 43.519296769  |
| 1  | 30.820256774 | 20.686865761 | 41.119927963  |
| 1  | 32.585080722 | 18.203475476 | 44.728387724  |
| 1  | 31.449404400 | 18.809603199 | 42.634689170  |
| 1  | 32.095582834 | 23.723658774 | 43.056978372  |
| 1  | 31.184504307 | 22.326114789 | 41.547187007  |
| 8  | 28.771433514 | 24.945555242 | 39.376055502  |
| 1  | 28.627456349 | 24.103842978 | 38.914865925  |
| 1  | 29.232996997 | 24.665415961 | 40.194042665  |
| 8  | 33.243572793 | 25.313062110 | 39.492962329  |
| 1  | 33.172596513 | 26.139519877 | 40.028319871  |
| 1  | 34.192669805 | 25.144732928 | 39.406271200  |
| 8  | 30.302348074 | 27.452958669 | 45.429579616  |
| 1  | 29.901690849 | 28.329089335 | 45.252349090  |
| 1  | 30.622837390 | 27.211218532 | 44.533523642  |
| 1  | 29.560204266 | 20.906940365 | 46.218141015  |
| 1  | 25.620151706 | 21.476004339 | 40.697159734  |
| 1  | 25.848800448 | 26.274854630 | 47.061771922  |
| 1  | 31.081685707 | 27.454643622 | 36.515734676  |
| 1  | 33.734182540 | 19.892586289 | 45.951801348  |

**TS7**

**QM/MM (BS1) = -3453.499251 a.u.**

**QM/MM (BS2+ZPE) = -3455.515109 a.u.**

|   |              |              |              |
|---|--------------|--------------|--------------|
| 6 | 29.673496258 | 21.777341079 | 45.862805282 |
| 7 | 30.165934138 | 22.887367228 | 46.514824552 |
| 1 | 30.604268851 | 22.905673083 | 47.444379154 |



|   |              |              |              |
|---|--------------|--------------|--------------|
| 1 | 28.274906020 | 29.442508362 | 41.460338749 |
| 1 | 28.958478097 | 29.835869952 | 39.877471837 |
| 1 | 28.905475677 | 27.393830049 | 40.019269215 |
| 1 | 30.583206300 | 27.950411059 | 40.085992455 |
| 8 | 34.373293712 | 22.273623321 | 45.159893496 |
| 6 | 33.666424537 | 21.471345219 | 44.587162556 |
| 7 | 33.000970536 | 21.844872479 | 43.367373844 |
| 6 | 33.289245367 | 23.114517154 | 42.887614771 |
| 6 | 32.123827686 | 20.996393255 | 42.689815480 |
| 7 | 31.400635679 | 21.483755087 | 41.697068822 |
| 6 | 32.058016493 | 19.643350112 | 43.121529207 |
| 6 | 32.671515973 | 19.276484644 | 44.278974177 |
| 7 | 33.431783058 | 20.169394960 | 45.007398472 |
| 1 | 33.039622902 | 23.357597936 | 41.857240530 |
| 1 | 33.974139731 | 23.702505417 | 43.489918870 |
| 1 | 30.850452104 | 20.844966253 | 41.094861096 |
| 1 | 32.535724746 | 18.272079470 | 44.684095970 |
| 1 | 31.434811919 | 18.929189791 | 42.585130752 |
| 1 | 31.010049380 | 24.855239873 | 42.004138378 |
| 1 | 31.163534701 | 22.485122381 | 41.612403155 |
| 8 | 28.983533883 | 25.040993322 | 39.441219082 |
| 1 | 28.733401572 | 24.148419631 | 39.144945398 |
| 1 | 29.567589035 | 24.812909238 | 40.202852789 |
| 8 | 33.129797536 | 25.254047814 | 39.657993229 |
| 1 | 33.115067998 | 26.141759662 | 40.090588306 |
| 1 | 34.068946159 | 25.041464014 | 39.553291118 |
| 8 | 30.313049250 | 27.427591219 | 45.294251546 |
| 1 | 29.918649514 | 28.310920151 | 45.138223703 |
| 1 | 30.632031347 | 27.192299831 | 44.397976917 |
| 1 | 29.539760567 | 20.844063821 | 46.232669640 |
| 1 | 25.584351283 | 21.464588144 | 40.657421475 |
| 1 | 25.851638934 | 26.266165306 | 47.032673709 |
| 1 | 31.058252934 | 27.420427217 | 36.511040943 |
| 1 | 33.727133767 | 19.918072598 | 45.929123764 |

**TSS**

**QM/MM (BS1) = -3453.514459 a.u.**

**QM/MM (BS2+ZPE) = -3455.525257 a.u.**

|   |              |              |              |
|---|--------------|--------------|--------------|
| 6 | 29.681312153 | 21.665218559 | 45.884433068 |
| 7 | 30.197430545 | 22.766727319 | 46.531857122 |
| 1 | 30.629420355 | 22.785758899 | 47.463536112 |
| 6 | 30.047969612 | 23.837025596 | 45.732525362 |
| 1 | 30.339613402 | 24.852852527 | 45.994738203 |
| 7 | 29.463566187 | 23.476035117 | 44.597930970 |
| 6 | 29.227247809 | 22.124648697 | 44.674212367 |
| 1 | 28.730173955 | 21.576506709 | 43.878371886 |
| 6 | 26.072706561 | 22.389111895 | 40.354567604 |
| 1 | 25.314944002 | 23.122106466 | 40.661022045 |
| 1 | 26.143030433 | 22.393478677 | 39.261964474 |
| 6 | 27.441509596 | 22.741310301 | 40.928288957 |
| 8 | 27.429104263 | 23.462717324 | 42.016005733 |
| 8 | 28.472819840 | 22.404353894 | 40.348640602 |
| 6 | 26.114436208 | 25.821386590 | 46.119539889 |
| 7 | 25.402738614 | 24.788383884 | 45.547923863 |
| 1 | 24.547069623 | 24.343838206 | 45.903030378 |
| 6 | 26.057119549 | 24.411402896 | 44.430385388 |
| 1 | 25.730700241 | 23.614072103 | 43.767385383 |
| 7 | 27.143025365 | 25.149776247 | 44.249702552 |
| 6 | 27.199900092 | 26.032999687 | 45.300817752 |
| 1 | 28.046790006 | 26.711448916 | 45.407992253 |
| 6 | 31.272235159 | 26.512655265 | 37.072299954 |
| 1 | 31.246646576 | 26.765783122 | 38.146940448 |

|    |              |              |              |
|----|--------------|--------------|--------------|
| 1  | 32.297111544 | 26.187043195 | 36.831279371 |
| 7  | 30.304855167 | 25.491573472 | 36.730880815 |
| 1  | 29.400693686 | 25.804883621 | 36.361263308 |
| 6  | 30.387394425 | 24.186605035 | 37.050866662 |
| 7  | 31.458855522 | 23.704631206 | 37.691686933 |
| 1  | 32.071707399 | 24.308780753 | 38.252069208 |
| 1  | 31.453055538 | 22.716293071 | 37.922080790 |
| 7  | 29.375222998 | 23.393036661 | 36.709146569 |
| 1  | 28.661416871 | 23.765461359 | 36.069644410 |
| 1  | 29.475411275 | 22.369052109 | 36.612822932 |
| 26 | 28.793165352 | 24.511041797 | 42.917000565 |
| 8  | 30.580435211 | 24.199993627 | 42.111794144 |
| 8  | 31.057150722 | 26.978511392 | 42.366983284 |
| 6  | 29.911058631 | 27.085382769 | 41.863872100 |
| 8  | 28.885969410 | 26.489912851 | 42.327365964 |
| 6  | 29.696496063 | 27.940362147 | 40.612985916 |
| 6  | 29.219008557 | 29.364426745 | 40.898036873 |
| 6  | 30.282338570 | 30.273401486 | 41.533455895 |
| 8  | 29.858340120 | 31.126111698 | 42.369833846 |
| 8  | 31.474198058 | 30.128160799 | 41.177153053 |
| 1  | 28.329610681 | 29.379191050 | 41.542553119 |
| 1  | 28.921179123 | 29.835018633 | 39.942211641 |
| 1  | 28.970404937 | 27.407883674 | 39.989920029 |
| 1  | 30.635719231 | 28.004156555 | 40.050517201 |
| 8  | 33.525449035 | 22.543502491 | 45.102002372 |
| 6  | 33.025946083 | 21.607202196 | 44.522677223 |
| 7  | 32.367471792 | 21.822210727 | 43.251177877 |
| 6  | 32.451481040 | 23.091341884 | 42.700057504 |
| 6  | 31.684842740 | 20.809936683 | 42.567086105 |
| 7  | 30.963840352 | 21.144795341 | 41.520122745 |
| 6  | 31.805878992 | 19.485654292 | 43.065792857 |
| 6  | 32.464999286 | 19.261374321 | 44.234267828 |
| 7  | 33.066197231 | 20.282258572 | 44.946082037 |
| 1  | 32.591546374 | 23.160379195 | 41.623149528 |
| 1  | 32.865305158 | 23.848635819 | 43.360044173 |
| 1  | 30.505127547 | 20.426329179 | 40.930286284 |
| 1  | 32.493873017 | 18.258226679 | 44.661604762 |
| 1  | 31.312317996 | 18.661336015 | 42.554110504 |
| 1  | 31.088262073 | 25.026635981 | 42.232525928 |
| 1  | 30.675886309 | 22.110295753 | 41.337382574 |
| 8  | 29.181415964 | 24.929053230 | 39.588026461 |
| 1  | 28.923654625 | 24.000613610 | 39.421600497 |
| 1  | 29.787123694 | 24.794616512 | 40.342477169 |
| 8  | 33.188752088 | 25.201717952 | 39.525883134 |
| 1  | 33.176050194 | 26.090708541 | 39.955450741 |
| 1  | 34.127117540 | 24.989964029 | 39.412037862 |
| 8  | 30.406870291 | 27.381976394 | 45.192840309 |
| 1  | 30.003632835 | 28.259019119 | 45.025784687 |
| 1  | 30.738159707 | 27.133690085 | 44.306372308 |
| 1  | 29.446843551 | 20.717741909 | 46.369592623 |
| 1  | 25.712504968 | 21.416886726 | 40.690871563 |
| 1  | 25.848278594 | 26.275034868 | 47.074228681 |
| 1  | 31.048725887 | 27.419241945 | 36.509973074 |
| 1  | 33.449987777 | 20.085867115 | 45.848361209 |

**PD**

**QM/MM (BS1) = -3453.609297 a.u.**

**QM/MM (BS2+ZPE) = -3455.604508 a.u.**

|   |              |              |              |
|---|--------------|--------------|--------------|
| 6 | 29.782674594 | 21.702401093 | 45.631315212 |
| 7 | 30.220690415 | 22.849663343 | 46.260875920 |
| 1 | 30.590031893 | 22.916538991 | 47.218408954 |

|    |              |              |              |
|----|--------------|--------------|--------------|
| 6  | 30.116568960 | 23.871731829 | 45.391619710 |
| 1  | 30.355444020 | 24.904858273 | 45.642250565 |
| 7  | 29.643395010 | 23.442415502 | 44.223545607 |
| 6  | 29.436841434 | 22.083744576 | 44.357955384 |
| 1  | 29.050599718 | 21.473513835 | 43.543529807 |
| 6  | 26.278122522 | 22.211502294 | 40.139318377 |
| 1  | 25.422670800 | 22.883352402 | 39.973682532 |
| 1  | 26.764686667 | 22.002773080 | 39.177420932 |
| 6  | 27.237213110 | 22.920949424 | 41.075200378 |
| 8  | 26.735550395 | 23.623478790 | 42.025445281 |
| 8  | 28.479019723 | 22.909663412 | 40.915518132 |
| 6  | 26.052816735 | 25.943401772 | 46.179259849 |
| 7  | 25.262657755 | 24.957886241 | 45.627909412 |
| 1  | 24.362365347 | 24.599932319 | 45.967403086 |
| 6  | 25.890562571 | 24.493240681 | 44.533182244 |
| 1  | 25.488885955 | 23.730982439 | 43.870245179 |
| 7  | 27.041366234 | 25.129863280 | 44.348557726 |
| 6  | 27.165601786 | 26.035755119 | 45.377038512 |
| 1  | 28.057170262 | 26.659597478 | 45.480651226 |
| 6  | 31.349914235 | 26.549620799 | 37.048837140 |
| 1  | 31.353238151 | 26.803570865 | 38.125385688 |
| 1  | 32.358756396 | 26.194576954 | 36.776177393 |
| 7  | 30.341299986 | 25.567513048 | 36.721722937 |
| 1  | 29.468493177 | 25.906239490 | 36.299797973 |
| 6  | 30.348266006 | 24.276544842 | 37.090893348 |
| 7  | 31.378218344 | 23.767198346 | 37.794958831 |
| 1  | 31.933888201 | 24.370561260 | 38.398180254 |
| 1  | 31.295278505 | 22.796817544 | 38.088114825 |
| 7  | 29.337981916 | 23.505710600 | 36.720938480 |
| 1  | 28.645089742 | 23.868947426 | 36.054518487 |
| 1  | 29.406354983 | 22.473522525 | 36.742388976 |
| 26 | 28.416150508 | 24.423871444 | 42.854268529 |
| 8  | 33.178849187 | 23.772602188 | 42.359226149 |
| 8  | 30.495400189 | 27.561698217 | 42.741531337 |
| 6  | 29.765450859 | 27.134418418 | 41.834221309 |
| 8  | 29.142586604 | 26.015209590 | 41.846432371 |
| 6  | 29.571739669 | 27.979345630 | 40.563422577 |
| 6  | 29.148759525 | 29.416469354 | 40.861251180 |
| 6  | 30.220319144 | 30.287728790 | 41.533185766 |
| 8  | 29.807886043 | 31.127696314 | 42.384320094 |
| 8  | 31.411973026 | 30.151641828 | 41.163402769 |
| 1  | 28.241420736 | 29.451240818 | 41.482540365 |
| 1  | 28.893853702 | 29.913213049 | 39.905639355 |
| 1  | 28.846412670 | 27.483216865 | 39.906728518 |
| 1  | 30.526668024 | 28.013408319 | 40.015260735 |
| 8  | 34.854171276 | 22.115466630 | 45.192050359 |
| 6  | 34.137547121 | 21.355030229 | 44.570718088 |
| 7  | 33.685826646 | 21.665866500 | 43.265271899 |
| 6  | 34.227013356 | 22.887173104 | 42.638685787 |
| 6  | 32.807525665 | 20.874196724 | 42.549663097 |
| 7  | 32.347672340 | 21.320845500 | 41.394744785 |
| 6  | 32.448955367 | 19.608514983 | 43.082722623 |
| 6  | 32.902905186 | 19.270010383 | 44.315182405 |
| 7  | 33.703784588 | 20.119361929 | 45.047013199 |
| 1  | 34.754101413 | 22.569854443 | 41.720501536 |
| 1  | 34.954806950 | 23.295210203 | 43.352772611 |
| 1  | 31.680207005 | 20.765911348 | 40.832201857 |
| 1  | 32.613896169 | 18.320140951 | 44.766231825 |
| 1  | 31.789317252 | 18.940767644 | 42.531778959 |
| 1  | 33.389300598 | 24.340505802 | 41.584572285 |
| 1  | 32.393104905 | 22.324707775 | 41.229470998 |
| 8  | 28.851234020 | 25.078332703 | 39.318110551 |

|   |              |              |              |
|---|--------------|--------------|--------------|
| 1 | 28.783914249 | 24.114301944 | 39.449870844 |
| 1 | 29.056397320 | 25.376841436 | 40.227288924 |
| 8 | 33.312348600 | 25.397595884 | 40.081368308 |
| 1 | 33.133478826 | 26.299643859 | 40.465583996 |
| 1 | 34.178223774 | 25.479987104 | 39.653954723 |
| 8 | 30.102558786 | 27.621271928 | 45.488786496 |
| 1 | 29.722051731 | 28.512040341 | 45.341957706 |
| 1 | 30.346549985 | 27.387673564 | 44.567326289 |
| 1 | 29.574081411 | 20.766418331 | 46.149477817 |
| 1 | 25.870559301 | 21.280487252 | 40.533235296 |
| 1 | 25.837885622 | 26.406020276 | 47.142512702 |
| 1 | 31.139302119 | 27.461368396 | 36.489886183 |
| 1 | 33.919598544 | 19.865012503 | 45.989723756 |

**Snapshot 4**  
**RC2**  
**QM/MM (BS1) = -3387.649551 a.u.**  
**QM/MM (BS2+ZPE) = -3389.601928 a.u.**

|    |              |              |              |
|----|--------------|--------------|--------------|
| 6  | 28.147647136 | 43.730064062 | 43.113309518 |
| 7  | 29.412446532 | 43.278708386 | 43.408698698 |
| 1  | 30.052598939 | 43.655280431 | 44.123849237 |
| 6  | 29.691071329 | 42.259639563 | 42.579589182 |
| 1  | 30.631143705 | 41.713879185 | 42.594106689 |
| 7  | 28.670312531 | 42.030694016 | 41.765234270 |
| 6  | 27.693176056 | 42.942850276 | 42.081938848 |
| 1  | 26.764334986 | 42.999031749 | 41.519358840 |
| 6  | 25.885963190 | 42.097265350 | 37.195442225 |
| 1  | 26.395165549 | 42.499997447 | 36.307275158 |
| 1  | 25.267421954 | 41.251756747 | 36.860492612 |
| 6  | 26.935677240 | 41.543949443 | 38.143210490 |
| 8  | 27.005108354 | 41.983973343 | 39.346881463 |
| 8  | 27.746154917 | 40.687080061 | 37.747134553 |
| 6  | 31.468356518 | 43.859757897 | 38.754516656 |
| 7  | 30.294490062 | 44.402947209 | 38.287671402 |
| 1  | 30.161278288 | 45.323400185 | 37.851606234 |
| 6  | 29.304782870 | 43.541164146 | 38.565178047 |
| 1  | 28.262211576 | 43.733031921 | 38.348039090 |
| 7  | 29.772589492 | 42.458171616 | 39.164817612 |
| 6  | 31.127981975 | 42.641053908 | 39.299541780 |
| 1  | 31.744889208 | 41.892615897 | 39.790121882 |
| 6  | 22.610906892 | 38.892616784 | 34.069814105 |
| 1  | 21.526553800 | 38.968449545 | 33.869426074 |
| 1  | 23.062084955 | 39.849250222 | 33.757533524 |
| 7  | 22.904868569 | 38.613091105 | 35.456701048 |
| 1  | 23.334612349 | 37.721475040 | 35.725800030 |
| 6  | 22.764562556 | 39.523282477 | 36.438398840 |
| 7  | 22.237524865 | 40.733488556 | 36.205120305 |
| 1  | 21.633674103 | 40.938154885 | 35.403168165 |
| 1  | 22.087002307 | 41.290333330 | 37.055197792 |
| 7  | 23.188521248 | 39.245276039 | 37.660453584 |
| 1  | 23.599371438 | 38.355537357 | 37.966402454 |
| 1  | 23.039171363 | 39.970090747 | 38.372323410 |
| 26 | 28.558360750 | 40.869029106 | 39.989604539 |
| 8  | 27.568350240 | 39.762843705 | 40.625857624 |
| 8  | 29.377001722 | 37.744913126 | 39.591015259 |
| 6  | 30.289436255 | 38.555548376 | 39.659146476 |
| 8  | 30.159267642 | 39.840435902 | 39.865622590 |
| 6  | 31.739229630 | 38.109719258 | 39.526760886 |
| 6  | 32.239880786 | 37.493421019 | 40.832363917 |
| 6  | 33.578202127 | 36.756572180 | 40.736558673 |
| 8  | 34.210249529 | 36.781154839 | 39.648496784 |



|   |              |              |              |    |              |              |              |
|---|--------------|--------------|--------------|----|--------------|--------------|--------------|
| 8 | 33.947164990 | 36.139919561 | 41.767887428 | 1  | 23.146327745 | 39.838245600 | 33.664015368 |
| 1 | 31.500656323 | 36.770285777 | 41.212742673 | 7  | 22.976244319 | 38.583629876 | 35.347393968 |
| 1 | 32.326915325 | 38.259197083 | 41.622215303 | 1  | 23.373546714 | 37.672785758 | 35.603278103 |
| 1 | 32.366575921 | 38.959920615 | 39.225849276 | 6  | 22.857651798 | 39.484305275 | 36.337326139 |
| 1 | 31.792426666 | 37.359513208 | 38.725045309 | 7  | 22.362822401 | 40.709517017 | 36.109804968 |
| 8 | 26.467207845 | 41.248784835 | 45.453745834 | 1  | 21.745447360 | 40.920882142 | 35.319446800 |
| 6 | 25.603062387 | 42.077191535 | 45.287985881 | 1  | 22.221461981 | 41.263027905 | 36.963430467 |
| 7 | 24.599877337 | 41.897484841 | 44.299452665 | 7  | 23.276566775 | 39.181026592 | 37.556510483 |
| 6 | 24.646285309 | 40.626301503 | 43.562382767 | 1  | 23.634621644 | 38.263630821 | 37.848415073 |
| 6 | 23.631613213 | 42.825251047 | 44.030250022 | 1  | 23.124205681 | 39.888376207 | 38.283940480 |
| 7 | 22.804979886 | 42.654059222 | 43.010379320 | 26 | 28.202000376 | 40.775971435 | 40.506818493 |
| 6 | 23.520714637 | 43.960346020 | 44.892449997 | 8  | 26.952278504 | 39.962160327 | 41.495802404 |
| 6 | 24.454782270 | 44.146015700 | 45.860568243 | 8  | 29.044409169 | 37.617359601 | 39.873499082 |
| 7 | 25.499668942 | 43.269147985 | 46.015606059 | 6  | 29.940141821 | 38.441242883 | 40.028437920 |
| 1 | 25.107477876 | 40.759181408 | 42.573099527 | 8  | 29.767658782 | 39.657574608 | 40.463198650 |
| 1 | 23.629246700 | 40.230270923 | 43.449490125 | 6  | 31.397972637 | 38.077238639 | 39.756703561 |
| 1 | 22.098223569 | 43.365231719 | 42.836105551 | 6  | 32.064715253 | 37.530529468 | 41.022335116 |
| 1 | 24.402935584 | 45.005375115 | 46.534057774 | 6  | 33.385781976 | 36.779177405 | 40.823721770 |
| 1 | 22.687523752 | 44.649925656 | 44.774784806 | 8  | 33.967253902 | 36.825306489 | 39.708297443 |
| 1 | 25.248551578 | 39.922552029 | 44.144741139 | 8  | 33.799770822 | 36.129681114 | 41.818238119 |
| 1 | 22.857831908 | 41.883044356 | 42.331376482 | 1  | 31.386403790 | 36.834890551 | 41.539726878 |
| 8 | 24.239346708 | 37.166931886 | 39.227323992 | 1  | 32.243008414 | 38.344266596 | 41.745159699 |
| 1 | 23.513389242 | 37.026848322 | 39.858225296 | 1  | 31.939757650 | 38.959332303 | 39.383010114 |
| 1 | 24.647337583 | 38.002921838 | 39.589011218 | 1  | 31.419780698 | 37.314477928 | 38.966950963 |
| 8 | 24.831880978 | 39.642420421 | 39.992912140 | 8  | 26.810320029 | 40.969369066 | 45.590165506 |
| 1 | 24.104532903 | 40.161445870 | 40.424494653 | 6  | 25.937203339 | 41.729659668 | 45.253906475 |
| 1 | 25.698100520 | 39.921583899 | 40.346809040 | 7  | 25.088673774 | 41.408783936 | 44.141536373 |
| 1 | 27.750721505 | 44.676124332 | 43.481395555 | 6  | 25.366858867 | 40.153762534 | 43.493342112 |
| 1 | 25.242409581 | 42.872970346 | 37.610397444 | 6  | 24.075120290 | 42.245661669 | 43.724361595 |
| 1 | 32.378278592 | 44.459094502 | 38.784596202 | 7  | 23.348940300 | 41.968876895 | 42.660073300 |
| 1 | 23.025895756 | 38.107529967 | 33.437761692 | 6  | 23.803523872 | 43.424870566 | 44.483651370 |
| 1 | 26.218220430 | 43.458748991 | 46.684715707 | 6  | 24.601072436 | 43.744248695 | 45.534790684 |
|   |              |              |              | 7  | 25.671110120 | 42.956604064 | 45.873440845 |
|   |              |              |              | 1  | 26.200651872 | 40.216037340 | 42.532886845 |
|   |              |              |              | 1  | 24.468260980 | 39.705208328 | 43.055846108 |
|   |              |              |              | 1  | 22.707260407 | 42.689239010 | 42.300907795 |
|   |              |              |              | 1  | 24.405344176 | 44.637064183 | 46.134933745 |
|   |              |              |              | 1  | 22.941031590 | 44.042475255 | 44.231379361 |
|   |              |              |              | 1  | 25.876426051 | 39.477997721 | 44.187810405 |
|   |              |              |              | 1  | 23.432556830 | 41.151191337 | 42.050566103 |
|   |              |              |              | 8  | 24.151741203 | 36.914203885 | 39.026360798 |
|   |              |              |              | 1  | 23.404390968 | 36.782790045 | 39.630984895 |
|   |              |              |              | 1  | 24.616006480 | 37.702662878 | 39.441553622 |
|   |              |              |              | 8  | 24.892523389 | 39.226792486 | 39.921873127 |
|   |              |              |              | 1  | 24.076726136 | 39.685577260 | 40.258534989 |
|   |              |              |              | 1  | 25.650953754 | 39.470781997 | 40.508761499 |
|   |              |              |              | 1  | 27.715572610 | 44.926003099 | 43.611942725 |
|   |              |              |              | 1  | 25.238113138 | 42.862693999 | 37.759388235 |
|   |              |              |              | 1  | 32.278765609 | 44.347375163 | 38.840908679 |
|   |              |              |              | 1  | 23.085086337 | 38.096316696 | 33.330180508 |
|   |              |              |              | 1  | 26.311203079 | 43.254975977 | 46.581415212 |

**TS7**

**QM/MM (BS1) = -3387.608678 a.u.**

**QM/MM (BS2+ZPE) = -3389.562261 a.u.**

|   |              |              |              |   |              |              |              |
|---|--------------|--------------|--------------|---|--------------|--------------|--------------|
| 6 | 28.084061499 | 43.949678208 | 43.297184139 | 6 | 30.556341623 | 22.656880214 | 48.650120925 |
| 7 | 29.345598920 | 43.483807550 | 43.583351453 | 7 | 31.469747296 | 23.627821023 | 48.995964055 |
| 1 | 30.015170275 | 43.871134964 | 44.262760027 | 1 | 32.202435574 | 23.543577365 | 49.713515694 |
| 6 | 29.583560981 | 42.421508930 | 42.801741532 | 6 | 31.253901807 | 24.702055204 | 48.216952802 |
| 1 | 30.513223969 | 41.859073743 | 42.813389591 |   |              |              |              |
| 7 | 28.535881978 | 42.175979852 | 42.030709172 |   |              |              |              |
| 6 | 27.586997742 | 43.125553711 | 42.319192715 |   |              |              |              |
| 1 | 26.651235160 | 43.179749410 | 41.768155334 |   |              |              |              |
| 6 | 25.880942314 | 42.034255823 | 37.461851421 |   |              |              |              |
| 1 | 26.534943470 | 42.368587818 | 36.641522252 |   |              |              |              |
| 1 | 25.275560917 | 41.200418400 | 37.079084372 |   |              |              |              |
| 6 | 26.741009297 | 41.501137823 | 38.597637102 |   |              |              |              |
| 8 | 26.792037621 | 42.106657389 | 39.713781915 |   |              |              |              |
| 8 | 27.452980773 | 40.476677228 | 38.435004037 |   |              |              |              |
| 6 | 31.367509395 | 43.750222656 | 38.873898255 |   |              |              |              |
| 7 | 30.186104205 | 44.290052873 | 38.426459497 |   |              |              |              |
| 1 | 30.054937718 | 45.204757926 | 37.978335676 |   |              |              |              |
| 6 | 29.199156705 | 43.440059292 | 38.761737550 |   |              |              |              |
| 1 | 28.152306684 | 43.644606312 | 38.580449542 |   |              |              |              |
| 7 | 29.667348970 | 42.369637129 | 39.380114625 |   |              |              |              |
| 6 | 31.027350470 | 42.548790960 | 39.465529807 |   |              |              |              |
| 1 | 31.661545717 | 41.817580045 | 39.962721790 |   |              |              |              |
| 6 | 22.681893258 | 38.885030377 | 33.965344567 |   |              |              |              |
| 1 | 21.597777464 | 38.977139948 | 33.769379659 |   |              |              |              |

**Snapshot 5**

**RC2**

**QM/MM (BS1) = -3454.993953 a.u.**

**QM/MM (BS2+ZPE) = -3457.012097 a.u.**

|   |              |              |              |
|---|--------------|--------------|--------------|
| 6 | 30.556341623 | 22.656880214 | 48.650120925 |
| 7 | 31.469747296 | 23.627821023 | 48.995964055 |
| 1 | 32.202435574 | 23.543577365 | 49.713515694 |
| 6 | 31.253901807 | 24.702055204 | 48.216952802 |

|    |              |              |              |                                            |              |              |              |
|----|--------------|--------------|--------------|--------------------------------------------|--------------|--------------|--------------|
| 1  | 31.830220261 | 25.620774738 | 48.284393585 | 1                                          | 28.530283049 | 22.995805129 | 41.885558964 |
| 7  | 30.244817950 | 24.477971113 | 47.382675743 | 8                                          | 28.421972447 | 27.145117372 | 42.699053994 |
| 6  | 29.797310414 | 23.196950830 | 47.635419052 | 1                                          | 28.518917169 | 26.752177250 | 41.812397563 |
| 1  | 28.983609905 | 22.754182585 | 47.061798905 | 1                                          | 28.941775438 | 26.564507481 | 43.288608319 |
| 6  | 25.489304614 | 24.019734720 | 45.195384191 | 8                                          | 31.875955178 | 25.751465908 | 43.001536065 |
| 1  | 24.921444450 | 24.898513427 | 45.524752932 | 1                                          | 31.130238874 | 25.133409397 | 43.033280873 |
| 1  | 25.311598623 | 23.867061004 | 44.120344586 | 1                                          | 31.736885730 | 26.323415977 | 43.788319772 |
| 6  | 26.992506209 | 24.219456755 | 45.385449376 | 1                                          | 30.427151035 | 21.740243675 | 49.225581239 |
| 8  | 27.320269670 | 25.298291524 | 46.073103358 | 1                                          | 25.100149083 | 23.149409097 | 45.723738808 |
| 8  | 27.811193166 | 23.435846741 | 44.931969187 | 1                                          | 28.287639786 | 27.641411197 | 51.324392799 |
| 6  | 28.130104746 | 27.238075658 | 50.324107598 | 1                                          | 29.690993652 | 27.910839645 | 36.987181238 |
| 7  | 27.124923333 | 26.336502165 | 50.040853172 | 1                                          | 33.861309140 | 19.648763437 | 47.097410369 |
| 1  | 26.386274884 | 26.020826113 | 50.675770529 | <b>TS7</b>                                 |              |              |              |
| 6  | 27.296824541 | 25.907753921 | 48.779178652 | <b>QM/MM (BS1) = -3454.951357 a.u.</b>     |              |              |              |
| 1  | 26.658510400 | 25.198075138 | 48.268672523 | <b>QM/MM (BS2+ZPE) = -3456.971787 a.u.</b> |              |              |              |
| 7  | 28.349876688 | 26.489938998 | 48.228231051 | 6                                          | 30.615522303 | 22.506379447 | 48.834224712 |
| 6  | 28.88522987  | 27.322002429 | 49.180889717 | 7                                          | 31.555510000 | 23.449714698 | 49.176680557 |
| 1  | 29.778866391 | 27.906701018 | 48.970707049 | 1                                          | 32.285088086 | 23.356638807 | 49.894128900 |
| 6  | 29.868800525 | 27.324628000 | 37.888739861 | 6                                          | 31.385186508 | 24.520469634 | 48.387150927 |
| 1  | 29.572792446 | 27.932971081 | 38.759108470 | 1                                          | 31.996562827 | 25.415655497 | 48.450708358 |
| 1  | 30.959839196 | 27.164388769 | 37.960880442 | 7                                          | 30.374848532 | 24.322209150 | 47.551376439 |
| 7  | 29.145929300 | 26.065657173 | 37.873987347 | 6                                          | 29.880983413 | 23.060736765 | 47.810577129 |
| 1  | 28.795941660 | 25.721655189 | 36.979276320 | 1                                          | 29.053256627 | 22.642195572 | 47.238338452 |
| 6  | 28.957584857 | 25.264685604 | 38.940413629 | 6                                          | 25.639088192 | 24.000174414 | 45.247697633 |
| 7  | 29.512340010 | 25.574831966 | 40.138510778 | 1                                          | 25.128063712 | 24.907823433 | 45.589827319 |
| 1  | 30.344792428 | 26.174472770 | 40.182185105 | 1                                          | 25.423596675 | 23.873376877 | 44.174535252 |
| 1  | 29.459348676 | 24.852719862 | 40.863755236 | 6                                          | 27.159853900 | 24.117325530 | 45.383426268 |
| 7  | 28.219473465 | 24.171820325 | 38.826563609 | 8                                          | 27.601514265 | 25.287292771 | 45.797967913 |
| 1  | 27.565888015 | 24.035094836 | 38.043958978 | 8                                          | 27.900177189 | 23.186484445 | 45.089302944 |
| 1  | 27.997139606 | 23.609741724 | 39.658737771 | 6                                          | 28.224692999 | 27.189549623 | 50.248301084 |
| 26 | 29.115549155 | 25.957557337 | 46.315840640 | 7                                          | 27.203225558 | 26.327742816 | 49.909613933 |
| 8  | 29.624153167 | 25.618133445 | 44.808557379 | 1                                          | 26.430007154 | 26.028572538 | 50.510315007 |
| 8  | 31.714996651 | 27.639001573 | 45.045321615 | 6                                          | 27.429757363 | 25.901650475 | 48.648580189 |
| 6  | 30.922241893 | 28.244607161 | 45.756408714 | 1                                          | 26.780952369 | 25.221556913 | 48.108369086 |
| 8  | 29.932871449 | 27.695027192 | 46.427953026 | 7                                          | 28.532557638 | 26.438660802 | 48.155084012 |
| 6  | 31.030557977 | 29.758157140 | 45.931010583 | 6                                          | 29.043571979 | 27.244908358 | 49.142450647 |
| 6  | 32.442835073 | 30.255385038 | 46.244205328 | 1                                          | 29.968041924 | 27.799152463 | 48.997325644 |
| 6  | 32.748149961 | 31.716325865 | 45.810167423 | 6                                          | 29.874800601 | 27.309336317 | 37.885038811 |
| 8  | 31.996341510 | 32.225996276 | 44.937369758 | 1                                          | 29.570314801 | 27.909493937 | 38.758494931 |
| 8  | 33.742139519 | 32.261526887 | 46.336751227 | 1                                          | 30.966465638 | 27.155983640 | 37.960984483 |
| 1  | 33.162135108 | 29.614683313 | 45.707173279 | 7                                          | 29.161949057 | 26.044520358 | 37.855561781 |
| 1  | 32.691968081 | 30.154976136 | 47.313592336 | 1                                          | 28.784855809 | 25.725674190 | 36.962828030 |
| 1  | 30.293124440 | 30.108979468 | 46.667799222 | 6                                          | 28.994460679 | 25.217194936 | 38.904516287 |
| 1  | 30.749974976 | 30.208281997 | 44.965175562 | 7                                          | 29.575647452 | 25.494928112 | 40.097407094 |
| 8  | 34.067300640 | 22.045261261 | 46.280494489 | 1                                          | 30.392762166 | 26.115552259 | 40.151756820 |
| 6  | 33.306547801 | 21.193337638 | 45.860974006 | 1                                          | 29.549762012 | 24.751838876 | 40.800247896 |
| 7  | 32.358476885 | 21.501621370 | 44.857637209 | 7                                          | 28.250425687 | 24.128839994 | 38.779048102 |
| 6  | 32.353136529 | 22.877233668 | 44.350756547 | 1                                          | 27.579992705 | 24.017093475 | 38.006763401 |
| 6  | 31.448806583 | 20.602096227 | 44.350015233 | 1                                          | 28.024633831 | 23.555981930 | 39.602281470 |
| 7  | 30.594866811 | 20.963923293 | 43.418006582 | 26                                         | 29.481454511 | 25.699001545 | 46.184249625 |
| 6  | 31.468629351 | 19.274767019 | 44.878343359 | 8                                          | 30.305238101 | 24.896191778 | 44.835395376 |
| 6  | 32.366946308 | 18.955234699 | 45.840722398 | 8                                          | 32.154832424 | 27.819611763 | 45.080715413 |
| 7  | 33.284674895 | 19.869537889 | 46.310820208 | 6                                          | 31.171822961 | 28.246756568 | 45.685576217 |
| 1  | 32.519285056 | 22.879420504 | 43.264413356 | 8                                          | 30.136477047 | 27.535700585 | 46.051050769 |
| 1  | 33.161736648 | 23.420215093 | 44.844112915 | 6                                          | 31.088975478 | 29.734455080 | 46.038716230 |
| 1  | 29.942923584 | 20.257412435 | 43.037340721 | 6                                          | 32.426381941 | 30.363250597 | 46.438850770 |
| 1  | 32.356696801 | 17.958933070 | 46.277221485 | 6                                          | 32.718799706 | 31.780524930 | 45.871396432 |
| 1  | 30.747826987 | 18.541543304 | 44.520942522 | 8                                          | 31.961602695 | 32.216032032 | 44.963905319 |
| 1  | 31.396155733 | 23.366524547 | 44.582843073 | 8                                          | 33.717210847 | 32.368971210 | 46.343122717 |
| 1  | 30.381705055 | 21.924129975 | 43.099608103 | 1                                          | 33.239310683 | 29.720956906 | 46.066688132 |
| 8  | 29.277530660 | 23.370967038 | 42.459366678 |                                            |              |              |              |
| 1  | 28.809430171 | 23.532171362 | 43.305909817 |                                            |              |              |              |

|   |              |              |              |
|---|--------------|--------------|--------------|
| 1 | 32.558778750 | 30.403959461 | 47.532433508 |
| 1 | 30.294881129 | 29.898452141 | 46.782038938 |
| 1 | 30.772539152 | 30.270032076 | 45.125967609 |
| 8 | 33.558251653 | 22.354823649 | 46.457652681 |
| 6 | 32.912981203 | 21.444719798 | 45.981737308 |
| 7 | 31.981165669 | 21.704039479 | 44.923452830 |
| 6 | 31.973115433 | 23.033089883 | 44.385093155 |
| 6 | 31.178634795 | 20.716749628 | 44.361910471 |
| 7 | 30.366963204 | 20.999649886 | 43.375895291 |
| 6 | 31.289925654 | 19.395298049 | 44.893441315 |
| 6 | 32.191368403 | 19.129932143 | 45.868404273 |
| 7 | 33.023866152 | 20.107820970 | 46.374209827 |
| 1 | 31.870594940 | 23.028738327 | 43.294415177 |
| 1 | 32.846531807 | 23.590708711 | 44.728280206 |
| 1 | 29.798986700 | 20.236318218 | 42.969316356 |
| 1 | 32.249470028 | 18.128550079 | 46.292830129 |
| 1 | 30.637245098 | 18.611904976 | 44.511610481 |
| 1 | 31.016200901 | 23.801434886 | 44.732227313 |
| 1 | 30.077644343 | 21.943765313 | 43.035249508 |
| 8 | 29.125014416 | 23.291469502 | 42.434055664 |
| 1 | 28.685673181 | 23.395763384 | 43.303531678 |
| 1 | 28.374795904 | 22.939896499 | 41.839341676 |
| 8 | 28.513707202 | 26.729724889 | 42.713848700 |
| 1 | 28.516977173 | 26.463169217 | 41.775605901 |
| 1 | 28.968807156 | 25.992194697 | 43.154488938 |
| 8 | 32.232710630 | 25.970994523 | 43.080864751 |
| 1 | 31.438845382 | 25.514601144 | 43.417060937 |
| 1 | 32.334585839 | 26.649133924 | 43.784742576 |
| 1 | 30.444318360 | 21.610041523 | 49.430324415 |
| 1 | 25.212335279 | 23.146288099 | 45.773841564 |
| 1 | 28.337296070 | 27.607471028 | 51.248665804 |
| 1 | 29.697176384 | 27.900989122 | 36.987005445 |
| 1 | 33.651224947 | 19.892976038 | 47.122698369 |

## References

1. Yi, C.; Chen, B.; Qi, B. Zhang, W.; Jia, G.; Zhang, L.; Li, C. J.; Dinner, A. R.; Yang, C. G.; He, C. Duplex interrogation by a direct DNA repair protein in search of base damage. *Nat. Struct. Mol. Biol.* 2012, 19(7), 671-676.
2. Yi, C.; Jia, G.; Hou, G.; Dai, Q.; Zhang, W.; Zheng, G.; Jian, X.; Yang, C. G.; Cui, Q.; He, C. Iron-catalysed oxidation intermediates captured in a DNA repair dioxygenase. *Nature.* 2010, 468(7321), 330-333.
